# Supplementary material for: Catalytic activation of unstrained C(aryl)–C(aryl) bonds in 2,2′-biphenols
Source: Springer Nature journal article supplement (doi:10.1038/s41557-018-0157-x), 2018-10-31
Supplement: 41557_2018_157_MOESM131_ESM.cif [file 41557_2018_157_MOESM131_ESM.cif]

data_mo_0350_ky_jun_0m
_audit_creation_date              2017-01-07
_audit_creation_method
;
Olex2 1.2
(compiled 2016.11.30 svn.r3356 for OlexSys, GUI svn.r5269)
;
_publ_contact_author_address      ?
_publ_contact_author_email        ?
_publ_contact_author_id_orcid     ?
_publ_contact_author_name         ''
_publ_contact_author_phone        ?
_publ_section_references
;
Dolomanov, O.V., Bourhis, L.J., Gildea, R.J, Howard, J.A.K. & Puschmann, H.
 (2009), J. Appl. Cryst. 42, 339-341.

Sheldrick, G.M. (2015). Acta Cryst. A71, 3-8.

Sheldrick, G.M. (2015). Acta Cryst. C71, 3-8.
;
_chemical_name_common             ?
_chemical_name_systematic         C38H48O2P2
_chemical_formula_moiety          'C38 H48 O2 P2'
_chemical_formula_sum             'C38 H48 O2 P2'
_chemical_formula_weight          598.70
_chemical_melting_point           ?
loop_
  _atom_type_symbol
  _atom_type_description
  _atom_type_scat_dispersion_real
  _atom_type_scat_dispersion_imag
  _atom_type_scat_source
 'C' 'C' 0.0033 0.0016 'International Tables Vol C Tables 4.2.6.8 and 6.1.1.4'
 'H' 'H' 0.0000 0.0000 'International Tables Vol C Tables 4.2.6.8 and 6.1.1.4'
 'O' 'O' 0.0106 0.0060 'International Tables Vol C Tables 4.2.6.8 and 6.1.1.4'
 'P' 'P' 0.1023 0.0942 'International Tables Vol C Tables 4.2.6.8 and 6.1.1.4'

_shelx_space_group_comment
;
The symmetry employed for this shelxl refinement is uniquely defined
by the following loop, which should always be used as a source of
symmetry information in preference to the above space-group names.
They are only intended as comments.
;
_space_group_crystal_system       'orthorhombic'
_space_group_IT_number            56
_space_group_name_H-M_alt         'P c c n'
_space_group_name_Hall            '-P 2ab 2ac'
loop_
  _space_group_symop_operation_xyz
 'x, y, z'
 '-x+1/2, -y+1/2, z'
 '-x, y+1/2, -z+1/2'
 'x+1/2, -y, -z+1/2'
 '-x, -y, -z'
 'x-1/2, y-1/2, -z'
 'x, -y-1/2, z-1/2'
 '-x-1/2, y, z-1/2'

_cell_length_a                    11.9826(7)
_cell_length_b                    15.2141(9)
_cell_length_c                    18.7565(10)
_cell_angle_alpha                 90
_cell_angle_beta                  90
_cell_angle_gamma                 90
_cell_volume                      3419.4(3)
_cell_formula_units_Z             4
_cell_measurement_reflns_used     8923
_cell_measurement_temperature     100
_cell_measurement_theta_max       27.86
_cell_measurement_theta_min       2.421
_shelx_estimated_absorpt_T_max    ?
_shelx_estimated_absorpt_T_min    ?
_exptl_absorpt_coefficient_mu     0.158
_exptl_absorpt_correction_T_max   0.7456
_exptl_absorpt_correction_T_min   0.6086
_exptl_absorpt_correction_type    multi-scan
_exptl_absorpt_process_details
;
SADABS-2016/2 (Bruker,2016/2) was used for absorption correction.
wR2(int) was 0.0843 before and 0.0460 after correction.
The Ratio of minimum to maximum transmission is 0.8163.
The \l/2 correction factor is Not present.
;
_exptl_absorpt_special_details    ?
_exptl_crystal_colour             'clear white'
_exptl_crystal_colour_lustre      clear
_exptl_crystal_colour_modifier    .
_exptl_crystal_colour_primary     white
_exptl_crystal_density_diffrn     1.163
_exptl_crystal_density_meas       ?
_exptl_crystal_density_method     ?
_exptl_crystal_description        prism
_exptl_crystal_F_000              1288
_exptl_crystal_preparation        'slow evaporation in DCM'
_exptl_crystal_recrystallization_method none
_exptl_crystal_size_max           0.2
_exptl_crystal_size_mid           0.1
_exptl_crystal_size_min           0.09
_exptl_transmission_factor_max    ?
_exptl_transmission_factor_min    ?
_diffrn_reflns_av_R_equivalents   0.0332
_diffrn_reflns_av_unetI/netI      0.0317
_diffrn_reflns_Laue_measured_fraction_full 1.000
_diffrn_reflns_Laue_measured_fraction_max 0.987
_diffrn_reflns_limit_h_max        12
_diffrn_reflns_limit_h_min        -15
_diffrn_reflns_limit_k_max        14
_diffrn_reflns_limit_k_min        -19
_diffrn_reflns_limit_l_max        24
_diffrn_reflns_limit_l_min        -24
_diffrn_reflns_number             21821
_diffrn_reflns_point_group_measured_fraction_full 1.000
_diffrn_reflns_point_group_measured_fraction_max 0.987
_diffrn_reflns_theta_full         25.242
_diffrn_reflns_theta_max          27.863
_diffrn_reflns_theta_min          2.163
_diffrn_ambient_temperature       100.02
_diffrn_detector                  'Bruker APEX2 area detector'
_diffrn_detector_area_resol_mean  7.9
_diffrn_detector_type             'CCD area detector'
_diffrn_measured_fraction_theta_full 1.000
_diffrn_measured_fraction_theta_max 0.987
_diffrn_measurement_device        'three-circle diffractometer'
_diffrn_measurement_device_type   'Bruker SMART APEX2 area detector'
_diffrn_measurement_method        '\w and \f scans'
_diffrn_radiation_monochromator   'mirror optics'
_diffrn_radiation_probe           x-ray
_diffrn_radiation_type            MoK\a
_diffrn_radiation_wavelength      0.71073
_diffrn_source                    'microfocus sealed X-ray tube'
_diffrn_source_type               'Incoatec I\ms'
_diffrn_special_details           none
_diffrn_standards_number          0
_reflns_Friedel_coverage          0.000
_reflns_Friedel_fraction_full     .
_reflns_Friedel_fraction_max      .
_reflns_number_gt                 3182
_reflns_number_total              4028
_reflns_special_details
;
 Reflections were merged by SHELXL according to the crystal
 class for the calculation of statistics and refinement.
 
 _reflns_Friedel_fraction is defined as the number of unique
 Friedel pairs measured divided by the number that would be
 possible theoretically, ignoring centric projections and
 systematic absences.
;
_reflns_threshold_expression      'I > 2\s(I)'
_computing_cell_refinement        'SAINT v8.37A (Bruker, 2015)'
_computing_data_collection        ?
_computing_data_reduction         'SAINT v8.37A (Bruker, 2015)'
_computing_molecular_graphics     'Olex2 (Dolomanov et al., 2009)'
_computing_publication_material   'Olex2 (Dolomanov et al., 2009)'
_computing_structure_refinement   'ShelXL (Sheldrick, 2015)'
_computing_structure_solution     'ShelXT (Sheldrick, 2015)'
_refine_diff_density_max          0.434
_refine_diff_density_min          -0.278
_refine_diff_density_rms          0.054
_refine_ls_extinction_coef        .
_refine_ls_extinction_method      none
_refine_ls_goodness_of_fit_ref    1.032
_refine_ls_hydrogen_treatment     constr
_refine_ls_matrix_type            full
_refine_ls_number_parameters      195
_refine_ls_number_reflns          4028
_refine_ls_number_restraints      0
_refine_ls_R_factor_all           0.0618
_refine_ls_R_factor_gt            0.0427
_refine_ls_restrained_S_all       1.032
_refine_ls_shift/su_max           0.001
_refine_ls_shift/su_mean          0.000
_refine_ls_structure_factor_coef  Fsqd
_refine_ls_weighting_details
'w=1/[\s^2^(Fo^2^)+(0.0510P)^2^+1.5010P] where P=(Fo^2^+2Fc^2^)/3'
_refine_ls_weighting_scheme       calc
_refine_ls_wR_factor_gt           0.0980
_refine_ls_wR_factor_ref          0.1065
_refine_special_details           none
_olex2_refinement_description
;
1. Fixed Uiso
 At 1.2 times of:
  All C(H) groups
 At 1.5 times of:
  All C(H,H,H) groups
2.a Ternary CH refined with riding coordinates:
 C15(H15), C18(H18)
2.b Aromatic/amide H refined with riding coordinates:
 C8(H8), C12(H12), C5(H5), C1(H1), C3(H3), C4(H4), C2(H2)
2.c Idealised Me refined as rotating group:
 C13(H13A,H13B,H13C), C16(H16A,H16B,H16C), C14(H14A,H14B,H14C), C19(H19A,H19B,
 H19C), C17(H17A,H17B,H17C)
;
_atom_sites_solution_hydrogens    geom
_atom_sites_solution_primary      dual
_atom_sites_solution_secondary    ?
loop_
  _atom_site_label
  _atom_site_type_symbol
  _atom_site_fract_x
  _atom_site_fract_y
  _atom_site_fract_z
  _atom_site_U_iso_or_equiv
  _atom_site_adp_type
  _atom_site_occupancy
  _atom_site_site_symmetry_order
  _atom_site_calc_flag
  _atom_site_refinement_flags_posn
  _atom_site_refinement_flags_adp
  _atom_site_refinement_flags_occupancy
  _atom_site_disorder_assembly
  _atom_site_disorder_group
 P1 P 0.49167(3) 0.25485(3) 0.55795(2) 0.01959(12) Uani 1 1 d . . . . .
 O1 O 0.35687(8) 0.27954(7) 0.54390(5) 0.0180(2) Uani 1 1 d . . . . .
 C9 C 0.26500(12) 0.29734(9) 0.43165(7) 0.0158(3) Uani 1 1 d . . . . .
 C8 C 0.23487(12) 0.35151(9) 0.37481(7) 0.0166(3) Uani 1 1 d . . . . .
 H8 H 0.196979 0.326843 0.335076 0.020 Uiso 1 1 calc R . . . .
 C10 C 0.32457(12) 0.33412(9) 0.48866(7) 0.0159(3) Uani 1 1 d . . . . .
 C7 C 0.25927(12) 0.44120(9) 0.37514(7) 0.0172(3) Uani 1 1 d . . . . .
 C6 C 0.22419(13) 0.49995(9) 0.31600(7) 0.0188(3) Uani 1 1 d . . . . .
 C12 C 0.31376(12) 0.47566(9) 0.43442(7) 0.0175(3) Uani 1 1 d . . . . .
 H12 H 0.329771 0.536803 0.435491 0.021 Uiso 1 1 calc R . . . .
 C11 C 0.34564(12) 0.42410(9) 0.49209(7) 0.0174(3) Uani 1 1 d . . . . .
 C5 C 0.12247(13) 0.48812(10) 0.28131(7) 0.0218(3) Uani 1 1 d . . . . .
 H5 H 0.075559 0.440471 0.294483 0.026 Uiso 1 1 calc R . . . .
 C13 C 0.39450(13) 0.46537(10) 0.55790(8) 0.0222(3) Uani 1 1 d . . . . .
 H13A H 0.346413 0.452722 0.598899 0.033 Uiso 1 1 calc GR . . . .
 H13B H 0.399833 0.529112 0.551195 0.033 Uiso 1 1 calc GR . . . .
 H13C H 0.469087 0.441172 0.566494 0.033 Uiso 1 1 calc GR . . . .
 C1 C 0.29116(14) 0.57031(10) 0.29569(8) 0.0245(3) Uani 1 1 d . . . . .
 H1 H 0.360613 0.579634 0.318918 0.029 Uiso 1 1 calc R . . . .
 C15 C 0.46713(13) 0.19372(10) 0.64162(7) 0.0216(3) Uani 1 1 d . . . . .
 H15 H 0.539081 0.164862 0.655098 0.026 Uiso 1 1 calc R . . . .
 C16 C 0.37856(14) 0.12170(11) 0.63698(8) 0.0273(4) Uani 1 1 d . . . . .
 H16A H 0.307635 0.147395 0.621410 0.041 Uiso 1 1 calc GR . . . .
 H16B H 0.368878 0.094549 0.683951 0.041 Uiso 1 1 calc GR . . . .
 H16C H 0.402366 0.076970 0.602596 0.041 Uiso 1 1 calc GR . . . .
 C3 C 0.15686(16) 0.61450(10) 0.20784(8) 0.0292(4) Uani 1 1 d . . . . .
 H3 H 0.134159 0.653269 0.170879 0.035 Uiso 1 1 calc R . . . .
 C4 C 0.08895(15) 0.54524(10) 0.22770(8) 0.0262(4) Uani 1 1 d . . . . .
 H4 H 0.019208 0.536723 0.204631 0.031 Uiso 1 1 calc R . . . .
 C18 C 0.51455(14) 0.16592(11) 0.49230(8) 0.0242(3) Uani 1 1 d . . . . .
 H18 H 0.445267 0.129667 0.487953 0.029 Uiso 1 1 calc R . . . .
 C14 C 0.43792(15) 0.25920(12) 0.70093(8) 0.0306(4) Uani 1 1 d . . . . .
 H14A H 0.495970 0.304442 0.703741 0.046 Uiso 1 1 calc GR . . . .
 H14B H 0.433175 0.228094 0.746581 0.046 Uiso 1 1 calc GR . . . .
 H14C H 0.365963 0.286897 0.690358 0.046 Uiso 1 1 calc GR . . . .
 C2 C 0.25754(15) 0.62712(11) 0.24177(8) 0.0294(4) Uani 1 1 d . . . . .
 H2 H 0.304147 0.674816 0.228274 0.035 Uiso 1 1 calc R . . . .
 C19 C 0.54292(15) 0.20661(13) 0.41979(9) 0.0343(4) Uani 1 1 d . . . . .
 H19A H 0.481997 0.245389 0.404761 0.051 Uiso 1 1 calc GR . . . .
 H19B H 0.552837 0.159800 0.384467 0.051 Uiso 1 1 calc GR . . . .
 H19C H 0.612052 0.240668 0.423785 0.051 Uiso 1 1 calc GR . . . .
 C17 C 0.61145(16) 0.10764(12) 0.51664(9) 0.0360(4) Uani 1 1 d . . . . .
 H17A H 0.675381 0.144614 0.529390 0.054 Uiso 1 1 calc GR . . . .
 H17B H 0.632646 0.067823 0.477868 0.054 Uiso 1 1 calc GR . . . .
 H17C H 0.588371 0.073182 0.558247 0.054 Uiso 1 1 calc GR . . . .

loop_
  _atom_site_aniso_label
  _atom_site_aniso_U_11
  _atom_site_aniso_U_22
  _atom_site_aniso_U_33
  _atom_site_aniso_U_23
  _atom_site_aniso_U_13
  _atom_site_aniso_U_12
 P1 0.0162(2) 0.0226(2) 0.02006(19) 0.00421(15) -0.00155(15) 0.00150(16)
 O1 0.0171(5) 0.0207(5) 0.0163(5) 0.0034(4) -0.0019(4) 0.0022(4)
 C9 0.0153(7) 0.0152(7) 0.0169(6) -0.0008(5) 0.0025(5) 0.0025(5)
 C8 0.0163(8) 0.0172(7) 0.0163(6) -0.0022(5) -0.0002(5) 0.0008(6)
 C10 0.0139(7) 0.0184(7) 0.0155(6) 0.0018(5) 0.0012(5) 0.0030(6)
 C7 0.0176(8) 0.0163(7) 0.0177(6) 0.0007(5) 0.0018(6) 0.0029(6)
 C6 0.0253(8) 0.0152(7) 0.0158(6) -0.0013(5) 0.0027(6) 0.0041(6)
 C12 0.0170(8) 0.0133(7) 0.0224(7) -0.0011(5) 0.0009(6) 0.0008(5)
 C11 0.0140(7) 0.0187(7) 0.0195(7) -0.0024(5) 0.0013(6) 0.0011(6)
 C5 0.0300(9) 0.0177(7) 0.0176(7) -0.0021(5) -0.0013(6) 0.0010(6)
 C13 0.0231(8) 0.0216(8) 0.0220(7) -0.0019(6) -0.0038(6) -0.0034(6)
 C1 0.0258(9) 0.0212(8) 0.0266(8) 0.0029(6) 0.0022(7) 0.0025(7)
 C15 0.0209(8) 0.0262(8) 0.0178(7) 0.0040(6) -0.0023(6) 0.0033(6)
 C16 0.0291(9) 0.0291(9) 0.0236(8) 0.0078(6) -0.0006(7) -0.0016(7)
 C3 0.0468(11) 0.0221(8) 0.0186(7) 0.0039(6) 0.0022(7) 0.0102(7)
 C4 0.0352(10) 0.0256(8) 0.0177(7) -0.0027(6) -0.0054(7) 0.0071(7)
 C18 0.0235(8) 0.0288(8) 0.0202(7) 0.0026(6) 0.0022(6) 0.0070(7)
 C14 0.0334(10) 0.0367(10) 0.0217(7) -0.0025(7) -0.0023(7) 0.0046(8)
 C2 0.0379(10) 0.0209(8) 0.0293(8) 0.0076(6) 0.0083(8) 0.0016(7)
 C19 0.0274(10) 0.0520(11) 0.0235(8) 0.0070(7) 0.0057(7) 0.0098(8)
 C17 0.0356(10) 0.0419(11) 0.0303(9) 0.0018(7) 0.0015(8) 0.0191(8)

_geom_special_details
;
 All esds (except the esd in the dihedral angle between two l.s. planes)
 are estimated using the full covariance matrix.  The cell esds are taken
 into account individually in the estimation of esds in distances, angles
 and torsion angles; correlations between esds in cell parameters are only
 used when they are defined by crystal symmetry.  An approximate (isotropic)
 treatment of cell esds is used for estimating esds involving l.s. planes.
;
loop_
  _geom_bond_atom_site_label_1
  _geom_bond_atom_site_label_2
  _geom_bond_distance
  _geom_bond_site_symmetry_2
  _geom_bond_publ_flag
 P1 O1 1.6793(11) . ?
 P1 C15 1.8478(15) . ?
 P1 C18 1.8500(16) . ?
 O1 C10 1.3830(16) . ?
 C9 C9 1.485(3) 2 ?
 C9 C8 1.3950(19) . ?
 C9 C10 1.4021(19) . ?
 C8 H8 0.9500 . ?
 C8 C7 1.395(2) . ?
 C10 C11 1.394(2) . ?
 C7 C6 1.4854(19) . ?
 C7 C12 1.3919(19) . ?
 C6 C5 1.393(2) . ?
 C6 C1 1.391(2) . ?
 C12 H12 0.9500 . ?
 C12 C11 1.3899(19) . ?
 C11 C13 1.5034(19) . ?
 C5 H5 0.9500 . ?
 C5 C4 1.388(2) . ?
 C13 H13A 0.9800 . ?
 C13 H13B 0.9800 . ?
 C13 H13C 0.9800 . ?
 C1 H1 0.9500 . ?
 C1 C2 1.390(2) . ?
 C15 H15 1.0000 . ?
 C15 C16 1.528(2) . ?
 C15 C14 1.534(2) . ?
 C16 H16A 0.9800 . ?
 C16 H16B 0.9800 . ?
 C16 H16C 0.9800 . ?
 C3 H3 0.9500 . ?
 C3 C4 1.382(2) . ?
 C3 C2 1.377(3) . ?
 C4 H4 0.9500 . ?
 C18 H18 1.0000 . ?
 C18 C19 1.532(2) . ?
 C18 C17 1.531(2) . ?
 C14 H14A 0.9800 . ?
 C14 H14B 0.9800 . ?
 C14 H14C 0.9800 . ?
 C2 H2 0.9500 . ?
 C19 H19A 0.9800 . ?
 C19 H19B 0.9800 . ?
 C19 H19C 0.9800 . ?
 C17 H17A 0.9800 . ?
 C17 H17B 0.9800 . ?
 C17 H17C 0.9800 . ?

loop_
  _geom_angle_atom_site_label_1
  _geom_angle_atom_site_label_2
  _geom_angle_atom_site_label_3
  _geom_angle
  _geom_angle_site_symmetry_1
  _geom_angle_site_symmetry_3
  _geom_angle_publ_flag
 O1 P1 C15 95.33(6) . . ?
 O1 P1 C18 101.63(6) . . ?
 C15 P1 C18 102.75(7) . . ?
 C10 O1 P1 121.40(9) . . ?
 C8 C9 C9 120.70(10) . 2 ?
 C8 C9 C10 118.60(13) . . ?
 C10 C9 C9 120.70(10) . 2 ?
 C9 C8 H8 119.3 . . ?
 C9 C8 C7 121.34(13) . . ?
 C7 C8 H8 119.3 . . ?
 O1 C10 C9 118.31(12) . . ?
 O1 C10 C11 120.29(12) . . ?
 C11 C10 C9 121.30(12) . . ?
 C8 C7 C6 121.73(13) . . ?
 C12 C7 C8 118.04(13) . . ?
 C12 C7 C6 120.17(13) . . ?
 C5 C6 C7 121.23(13) . . ?
 C1 C6 C7 120.28(14) . . ?
 C1 C6 C5 118.44(14) . . ?
 C7 C12 H12 118.7 . . ?
 C11 C12 C7 122.55(13) . . ?
 C11 C12 H12 118.7 . . ?
 C10 C11 C13 121.25(13) . . ?
 C12 C11 C10 117.94(13) . . ?
 C12 C11 C13 120.69(13) . . ?
 C6 C5 H5 119.7 . . ?
 C4 C5 C6 120.69(15) . . ?
 C4 C5 H5 119.7 . . ?
 C11 C13 H13A 109.5 . . ?
 C11 C13 H13B 109.5 . . ?
 C11 C13 H13C 109.5 . . ?
 H13A C13 H13B 109.5 . . ?
 H13A C13 H13C 109.5 . . ?
 H13B C13 H13C 109.5 . . ?
 C6 C1 H1 119.7 . . ?
 C2 C1 C6 120.70(16) . . ?
 C2 C1 H1 119.7 . . ?
 P1 C15 H15 107.4 . . ?
 C16 C15 P1 115.03(10) . . ?
 C16 C15 H15 107.4 . . ?
 C16 C15 C14 110.40(13) . . ?
 C14 C15 P1 108.99(11) . . ?
 C14 C15 H15 107.4 . . ?
 C15 C16 H16A 109.5 . . ?
 C15 C16 H16B 109.5 . . ?
 C15 C16 H16C 109.5 . . ?
 H16A C16 H16B 109.5 . . ?
 H16A C16 H16C 109.5 . . ?
 H16B C16 H16C 109.5 . . ?
 C4 C3 H3 120.1 . . ?
 C2 C3 H3 120.1 . . ?
 C2 C3 C4 119.82(15) . . ?
 C5 C4 H4 119.9 . . ?
 C3 C4 C5 120.13(16) . . ?
 C3 C4 H4 119.9 . . ?
 P1 C18 H18 109.6 . . ?
 C19 C18 P1 109.15(12) . . ?
 C19 C18 H18 109.6 . . ?
 C17 C18 P1 109.73(11) . . ?
 C17 C18 H18 109.6 . . ?
 C17 C18 C19 109.30(13) . . ?
 C15 C14 H14A 109.5 . . ?
 C15 C14 H14B 109.5 . . ?
 C15 C14 H14C 109.5 . . ?
 H14A C14 H14B 109.5 . . ?
 H14A C14 H14C 109.5 . . ?
 H14B C14 H14C 109.5 . . ?
 C1 C2 H2 119.9 . . ?
 C3 C2 C1 120.22(16) . . ?
 C3 C2 H2 119.9 . . ?
 C18 C19 H19A 109.5 . . ?
 C18 C19 H19B 109.5 . . ?
 C18 C19 H19C 109.5 . . ?
 H19A C19 H19B 109.5 . . ?
 H19A C19 H19C 109.5 . . ?
 H19B C19 H19C 109.5 . . ?
 C18 C17 H17A 109.5 . . ?
 C18 C17 H17B 109.5 . . ?
 C18 C17 H17C 109.5 . . ?
 H17A C17 H17B 109.5 . . ?
 H17A C17 H17C 109.5 . . ?
 H17B C17 H17C 109.5 . . ?

_shelx_res_file
;
TITL mo_0350_ky_jun_0m_a.res in Pccn
    mo_0350_ky_jun_0m.res
    created by SHELXL-2016/6 at 16:10:18 on 07-Jan-2017
REM Old TITL mo_0350_KY_Jun_0m in Pccn
REM SHELXT solution in Pccn
REM R1 0.118, Rweak 0.003, Alpha 0.023, Orientation as input
REM Formula found by SHELXT: C19 O P
CELL 0.71073 11.9826 15.2141 18.7565 90 90 90
ZERR 4 0.0007 0.0009 0.001 0 0 0
LATT 1
SYMM 0.5-X,0.5-Y,+Z
SYMM -X,0.5+Y,0.5-Z
SYMM 0.5+X,-Y,0.5-Z
SFAC C H O P
UNIT 152 192 8 8

L.S. 10
PLAN  20
TEMP -173.13
BOND $H
list 4
fmap 2
acta
REM <olex2.extras>
REM <HklSrc "%.\\mo_0350_KY_Jun_0m.hkl">
REM </olex2.extras>

WGHT    0.051000    1.501000
FVAR       0.33585
P1    4    0.491673    0.254855    0.557951    11.00000    0.01615    0.02256 =
         0.02006    0.00421   -0.00155    0.00150
O1    3    0.356866    0.279544    0.543897    11.00000    0.01714    0.02070 =
         0.01628    0.00340   -0.00186    0.00215
C9    1    0.265000    0.297340    0.431651    11.00000    0.01531    0.01524 =
         0.01693   -0.00078    0.00251    0.00246
C8    1    0.234874    0.351510    0.374812    11.00000    0.01633    0.01723 =
         0.01626   -0.00216   -0.00016    0.00078
AFIX  43
H8    2    0.196979    0.326843    0.335076    11.00000   -1.20000
AFIX   0
C10   1    0.324570    0.334119    0.488656    11.00000    0.01386    0.01837 =
         0.01551    0.00177    0.00118    0.00302
C7    1    0.259273    0.441196    0.375138    11.00000    0.01760    0.01629 =
         0.01766    0.00067    0.00181    0.00288
C6    1    0.224188    0.499951    0.315996    11.00000    0.02529    0.01525 =
         0.01578   -0.00135    0.00271    0.00409
C12   1    0.313757    0.475662    0.434416    11.00000    0.01697    0.01327 =
         0.02236   -0.00106    0.00093    0.00082
AFIX  43
H12   2    0.329771    0.536803    0.435491    11.00000   -1.20000
AFIX   0
C11   1    0.345644    0.424104    0.492095    11.00000    0.01396    0.01871 =
         0.01945   -0.00236    0.00134    0.00112
C5    1    0.122469    0.488119    0.281314    11.00000    0.03002    0.01773 =
         0.01763   -0.00215   -0.00129    0.00101
AFIX  43
H5    2    0.075559    0.440471    0.294483    11.00000   -1.20000
AFIX   0
C13   1    0.394496    0.465369    0.557898    11.00000    0.02305    0.02156 =
         0.02205   -0.00191   -0.00384   -0.00341
AFIX 137
H13A  2    0.346413    0.452722    0.598899    11.00000   -1.50000
H13B  2    0.399833    0.529112    0.551195    11.00000   -1.50000
H13C  2    0.469087    0.441172    0.566494    11.00000   -1.50000
AFIX   0
C1    1    0.291163    0.570310    0.295690    11.00000    0.02578    0.02123 =
         0.02656    0.00286    0.00219    0.00249
AFIX  43
H1    2    0.360613    0.579634    0.318918    11.00000   -1.20000
AFIX   0
C15   1    0.467128    0.193716    0.641619    11.00000    0.02086    0.02622 =
         0.01779    0.00401   -0.00234    0.00331
AFIX  13
H15   2    0.539081    0.164862    0.655098    11.00000   -1.20000
AFIX   0
C16   1    0.378562    0.121702    0.636978    11.00000    0.02910    0.02911 =
         0.02362    0.00781   -0.00061   -0.00159
AFIX 137
H16A  2    0.307635    0.147395    0.621410    11.00000   -1.50000
H16B  2    0.368878    0.094549    0.683951    11.00000   -1.50000
H16C  2    0.402366    0.076970    0.602596    11.00000   -1.50000
AFIX   0
C3    1    0.156864    0.614495    0.207835    11.00000    0.04678    0.02210 =
         0.01860    0.00390    0.00216    0.01018
AFIX  43
H3    2    0.134159    0.653269    0.170879    11.00000   -1.20000
AFIX   0
C4    1    0.088951    0.545243    0.227705    11.00000    0.03516    0.02557 =
         0.01772   -0.00272   -0.00541    0.00706
AFIX  43
H4    2    0.019208    0.536723    0.204631    11.00000   -1.20000
AFIX   0
C18   1    0.514548    0.165917    0.492299    11.00000    0.02352    0.02882 =
         0.02022    0.00263    0.00225    0.00702
AFIX  13
H18   2    0.445267    0.129667    0.487953    11.00000   -1.20000
AFIX   0
C14   1    0.437923    0.259198    0.700928    11.00000    0.03337    0.03674 =
         0.02165   -0.00246   -0.00226    0.00461
AFIX 137
H14A  2    0.495970    0.304442    0.703741    11.00000   -1.50000
H14B  2    0.433175    0.228094    0.746581    11.00000   -1.50000
H14C  2    0.365963    0.286897    0.690358    11.00000   -1.50000
AFIX   0
C2    1    0.257537    0.627123    0.241767    11.00000    0.03789    0.02094 =
         0.02926    0.00760    0.00828    0.00158
AFIX  43
H2    2    0.304147    0.674816    0.228274    11.00000   -1.20000
AFIX   0
C19   1    0.542915    0.206611    0.419794    11.00000    0.02744    0.05200 =
         0.02355    0.00703    0.00569    0.00984
AFIX 137
H19A  2    0.481997    0.245389    0.404761    11.00000   -1.50000
H19B  2    0.552837    0.159800    0.384467    11.00000   -1.50000
H19C  2    0.612052    0.240668    0.423785    11.00000   -1.50000
AFIX   0
C17   1    0.611451    0.107643    0.516640    11.00000    0.03561    0.04190 =
         0.03034    0.00183    0.00152    0.01905
AFIX 137
H17A  2    0.675381    0.144614    0.529390    11.00000   -1.50000
H17B  2    0.632646    0.067823    0.477868    11.00000   -1.50000
H17C  2    0.588371    0.073182    0.558247    11.00000   -1.50000
AFIX   0
HKLF 4


REM  mo_0350_ky_jun_0m_a.res in Pccn
REM R1 =  0.0427 for    3182 Fo > 4sig(Fo)  and  0.0618 for all    4028 data
REM    195 parameters refined using      0 restraints

END

WGHT      0.0515      1.4969

REM Highest difference peak  0.434,  deepest hole -0.278,  1-sigma level  0.054
Q1    1   0.2500  0.2500  0.4352  10.50000  0.05    0.43
Q2    1   0.4176  0.2663  0.5447  11.00000  0.05    0.39
Q3    1   0.2373  0.4689  0.3470  11.00000  0.05    0.36
Q4    1   0.4812  0.2204  0.6040  11.00000  0.05    0.34
Q5    1   0.2369  0.4016  0.3782  11.00000  0.05    0.34
Q6    1   0.5060  0.2091  0.5209  11.00000  0.05    0.31
Q7    1   0.1653  0.5066  0.3087  11.00000  0.05    0.30
Q8    1   0.3062  0.4479  0.4674  11.00000  0.05    0.29
Q9    1   0.2624  0.5904  0.2671  11.00000  0.05    0.29
Q10   1   0.3372  0.3826  0.4900  11.00000  0.05    0.29
Q11   1   0.2463  0.5384  0.3147  11.00000  0.05    0.28
Q12   1   0.3455  0.3066  0.5119  11.00000  0.05    0.28
Q13   1   0.1232  0.5151  0.2516  11.00000  0.05    0.27
Q14   1   0.2600  0.4613  0.4062  11.00000  0.05    0.27
Q15   1   0.3140  0.3029  0.4493  11.00000  0.05    0.27
Q16   1   0.2641  0.3181  0.4702  11.00000  0.05    0.26
Q17   1   0.5586  0.2930  0.5563  11.00000  0.05    0.26
Q18   1   0.4587  0.2283  0.6681  11.00000  0.05    0.25
Q19   1   0.1136  0.5864  0.2286  11.00000  0.05    0.25
Q20   1   0.1884  0.4872  0.2942  11.00000  0.05    0.25
;
_shelx_res_checksum               71191
_shelx_hkl_file
;
   2   0   0   55.39    1.80
   2   0   0   58.99    1.80
  -2   0   0   54.79    1.80
  -2   0   0   56.49    1.80
  -4   0   0  307.77    7.90
  -4   0   0  313.97    7.90
   4   0   0  313.07    7.90
   4   0   0  293.97    7.90
  -5   0   0   -2.50    1.20
   5   0   0    1.40    1.20
  -5   0   0    0.80    1.00
   5   0   0    0.30    1.00
   6   0   0  201.78    6.30
  -6   0   0  231.58    6.40
  -6   0   0  216.58    6.30
  -7   0   0    0.30    1.10
  -7   0   0    0.60    1.20
  -8   0   0 1629.64   39.30
  -8   0   0 1636.44   39.20
  -9   0   0    1.60    1.90
  -9   0   0   -1.10    1.90
 -10   0   0   -0.70    2.20
 -10   0   0   -0.30    2.20
 -11   0   0   -4.80    2.30
 -12   0   0  117.89    6.20
 -13   0   0    3.20    3.40
 -14   0   0    2.60    4.70
   1   1   0 2327.07   54.99
  -1   1   0 2321.97   53.99
  -2  -1   0    2.40    0.80
  -2   1   0   -0.80    0.40
   2  -1   0   -0.30    0.50
  -2  -1   0    0.50    0.50
   2   1   0    1.40    0.70
   2   1   0   -0.10    0.50
  -3  -1   0    5.10    0.70
   3  -1   0    5.50    0.70
   3   1   0    5.50    0.70
   3  -1   0    4.60    0.60
  -3  -1   0    5.90    0.80
   3   1   0    4.50    0.60
  -3   1   0    7.20    0.70
   4  -1   0   -0.50    0.80
  -4  -1   0   -0.10    0.80
   4   1   0    1.80    0.80
  -4  -1   0   -0.10    0.80
   4  -1   0   -0.20    0.80
   4   1   0    0.60    0.70
  -4   1   0   -0.40    0.70
  -4   1   0    1.50    0.80
  -5   1   0    2.50    1.20
  -5  -1   0    2.30    1.20
   5   1   0    1.20    1.00
  -5  -1   0    0.80    1.50
   5  -1   0    2.10    1.10
   5  -1   0    1.30    1.20
  -5   1   0   -2.20    1.00
  -6  -1   0    0.80    1.10
   6   1   0   -1.30    1.10
  -6   1   0    1.00    1.10
   6  -1   0    0.10    1.20
  -6  -1   0   -0.50    1.40
  -6   1   0   -0.10    1.10
  -7   1   0   30.50    2.20
  -7  -1   0   24.70    2.40
  -7   1   0   26.50    2.30
  -8  -1   0   -2.90    1.60
  -8  -1   0   -0.20    1.60
  -8   1   0    1.20    1.70
  -9   1   0  292.17    8.70
  -9  -1   0  297.87    9.10
  -9  -1   0  288.27    9.00
 -10   1   0   -0.90    1.90
 -10  -1   0    0.80    2.20
 -10  -1   0    3.40    2.20
 -11  -1   0    6.30    2.90
 -11   1   0    1.90    2.40
 -11  -1   0    6.10    2.70
 -12  -1   0   -4.20    2.90
 -12   1   0   -1.50    2.80
 -12  -1   0    0.50    2.90
 -13   1   0   50.89    5.30
 -13  -1   0   41.30    4.50
 -14  -1   0    5.20    4.00
   0  -2   0  303.27    7.30
   0  -2   0  313.27    7.40
  -1  -2   0    0.00    0.30
   1  -2   0   -0.50    0.20
   1  -2   0   -0.30    0.30
  -1   2   0    0.30    0.20
  -1   2   0    0.40    0.20
   1   2   0    0.10    0.30
   1  -2   0    0.00    0.20
   1   2   0   -0.20    0.30
  -1  -2   0    0.10    0.30
  -2   2   0 6530.35  152.28
   2  -2   0 6601.54  152.38
  -2  -2   0 6594.74  153.78
  -2  -2   0 6491.95  153.28
   2   2   0 6746.02  152.28
   2   2   0 6511.45  153.08
  -3   2   0    0.20    0.40
   3   2   0   -1.00    0.50
   3  -2   0    0.40    0.40
  -3  -2   0    0.40    0.50
   3   2   0    0.00    0.50
  -3  -2   0   -0.40    0.60
   4   2   0 2793.62   68.99
   4  -2   0 3054.79   68.79
   4   2   0 3109.59   69.09
  -4   2   0 2943.91   68.79
  -4  -2   0 2964.90   69.19
  -4  -2   0 2996.20   69.09
   4  -2   0 2905.81   68.99
  -5  -2   0   -1.50    1.50
   5   2   0   -0.40    1.10
  -5  -2   0    1.30    1.10
   5  -2   0   -0.70    1.00
  -5   2   0   -2.40    0.90
   5  -2   0    0.50    1.20
   6  -2   0 1272.77   32.00
  -6   2   0 1407.66   32.10
  -6  -2   0 1333.57   32.50
  -6  -2   0 1381.76   32.30
  -7  -2   0    0.80    1.70
  -7  -2   0    0.10    1.20
  -7   2   0    0.30    1.10
  -8  -2   0  152.68    5.90
  -8   2   0  160.08    5.40
  -8  -2   0  155.38    5.60
  -9  -2   0   -3.20    1.80
  -9  -2   0    0.50    2.20
  -9   2   0   -0.20    1.70
 -10  -2   0   23.60    3.20
 -10   2   0   21.40    2.70
 -10  -2   0   23.00    3.00
 -11   2   0    5.90    2.20
 -11  -2   0   -0.20    2.50
 -11  -2   0   -0.80    2.60
 -12  -2   0   88.89    6.30
 -12   2   0   95.99    5.70
 -12  -2   0   89.99    6.20
 -13  -2   0   -0.60    3.60
 -13  -2   0    5.80    3.60
 -14  -2   0   97.89    7.50
 -14  -2   0   94.69    7.90
 -15  -2   0    0.80    4.50
   0   3   0    0.80    0.50
   0   3   0    0.40    0.40
   0  -3   0    1.10    0.50
   0  -3   0    0.20    0.50
  -1   3   0  645.34   14.90
  -1   3   0  639.44   14.70
   1  -3   0  615.74   14.90
   1  -3   0  627.24   14.70
   1  -3   0  618.14   14.70
   1   3   0  610.84   14.80
  -1  -3   0  620.54   14.90
  -1  -3   0  625.64   14.90
   2   3   0   -0.70    0.40
   2   3   0   -0.10    0.50
  -2   3   0    0.00    0.30
  -2  -3   0   -0.40    0.40
   2  -3   0    0.40    0.30
   2  -3   0    0.10    0.40
  -2  -3   0    0.40    0.50
   3  -3   0  165.38    4.20
  -3  -3   0  161.98    4.50
  -3   3   0  159.88    4.20
   3   3   0  165.18    4.50
   3   3   0  147.69    4.40
   4  -3   0   -0.60    0.70
  -4  -3   0    1.20    1.30
  -4   3   0   -0.70    0.60
  -4  -3   0    0.30    0.90
   4   3   0    0.90    0.90
  -5  -3   0   95.59    3.50
   5  -3   0   91.09    3.50
   5  -3   0   96.69    3.20
  -5   3   0   93.79    3.10
   5   3   0   96.19    3.60
  -5  -3   0   99.19    4.00
  -6  -3   0   -1.50    1.00
   6  -3   0   -0.90    1.30
  -6   3   0   -1.00    0.80
  -6  -3   0    1.50    1.70
  -7  -3   0   51.29    3.50
  -7  -3   0   54.39    2.90
  -7   3   0   55.69    2.80
  -8  -3   0   -1.00    2.10
  -8  -3   0    0.10    1.70
  -8   3   0   -1.60    1.40
  -9  -3   0   38.30    4.00
  -9  -3   0   40.70    3.70
 -10   3   0    0.50    1.90
 -10  -3   0    0.20    2.50
 -10  -3   0   -0.30    2.10
 -11  -3   0   42.00    4.70
 -11   3   0   41.90    4.00
 -11  -3   0   45.40    4.80
 -12  -3   0    0.70    3.20
 -12   3   0    0.40    2.70
 -12  -3   0   -0.80    3.00
 -13  -3   0   15.60    3.80
 -13  -3   0   14.00    4.20
 -14  -3   0    2.80    4.20
 -14  -3   0    0.70    4.10
 -15  -3   0  142.79    9.40
   0   4   0 1590.14   36.00
   0  -4   0 1525.05   35.80
   0  -4   0 1528.95   36.00
   0   4   0 1513.45   35.90
  -1   4   0    0.20    0.50
   1  -4   0   -0.10    0.30
  -1  -4   0    0.40    0.50
   1   4   0    0.30    0.40
  -1   4   0   -0.10    0.40
   1  -4   0   -0.30    0.40
  -1  -4   0   -0.10    0.40
   1   4   0    0.20    0.40
   1  -4   0    0.20    0.40
  -2   4   0 2523.45   56.49
   2  -4   0 2415.76   56.39
   2   4   0 2514.75   56.79
   2   4   0 2242.38   56.59
  -2   4   0 2438.06   56.39
  -2  -4   0 2419.76   56.79
   2  -4   0 2474.75   56.79
   2  -4   0 2467.25   56.49
  -3  -4   0    1.40    1.00
   3   4   0   -0.60    0.80
   3  -4   0   -0.60    0.50
  -3   4   0    0.10    0.50
   3  -4   0    0.30    0.50
  -3  -4   0   -0.50    0.70
   4  -4   0  363.16    8.90
   4   4   0  362.36    9.40
  -4   4   0  351.56    8.90
  -4  -4   0  361.16    9.60
  -4  -4   0  353.86    9.40
  -5   4   0    1.70    0.80
   5  -4   0   -1.20    0.90
  -5  -4   0    1.50    1.70
  -5  -4   0    0.10    1.00
   5   4   0   -1.20    1.00
  -6  -4   0  179.58    6.10
   6  -4   0  178.58    5.30
  -6   4   0  174.98    5.10
  -6  -4   0  182.88    5.70
  -7   4   0   -0.60    1.20
   7  -4   0   -0.20    1.70
  -7  -4   0    0.70    2.00
  -8  -4   0   47.50    4.00
  -8   4   0   51.09    3.20
  -8  -4   0   58.99    3.70
  -9  -4   0    0.50    2.40
  -9  -4   0    0.00    2.00
  -9   4   0   -2.70    1.70
 -10  -4   0  189.88    7.80
 -10   4   0  196.98    6.60
 -10  -4   0  179.68    7.10
 -11   4   0    3.80    2.30
 -11  -4   0    1.20    3.00
 -11  -4   0   -2.20    2.70
 -12  -4   0   16.40    4.30
 -12  -4   0   16.70    3.50
 -13  -4   0    0.80    3.90
 -13  -4   0   -1.20    3.60
 -14  -4   0  105.19    8.10
 -14  -4   0  119.29    9.10
 -15  -4   0    1.40    5.30
   0  -5   0    0.30    0.60
   0  -5   0    0.60    0.50
   0   5   0    0.90    0.60
   0   5   0    0.30    0.60
  -1   5   0  471.75   11.40
   1  -5   0  454.15   11.10
   1  -5   0  462.75   11.20
   1   5   0  426.16   11.20
  -1  -5   0  459.65   11.40
  -1   5   0  467.15   11.20
   1   5   0  464.05   11.40
   1  -5   0  460.25   11.40
  -1  -5   0  463.15   11.30
  -2  -5   0    0.10    0.80
  -2  -5   0    0.40    0.90
   2  -5   0    0.10    0.70
  -2   5   0    0.50    0.60
   2   5   0    0.30    0.80
   2  -5   0    0.00    0.70
   2  -5   0    0.70    0.60
  -3  -5   0  195.28    5.70
   3  -5   0  198.68    5.60
  -3  -5   0  205.78    5.90
   3   5   0  205.18    5.80
   3  -5   0  198.68    5.20
  -3   5   0  192.58    5.20
   3  -5   0  199.48    5.30
   4   5   0    0.50    1.00
  -4  -5   0    1.10    1.50
  -4   5   0   -0.30    0.70
  -4  -5   0   -0.20    0.90
   4  -5   0    0.10    0.80
   4  -5   0    0.30    0.60
  -5   5   0    8.10    1.00
   5   5   0    5.60    1.50
   5  -5   0   11.50    1.20
  -5  -5   0    5.90    1.60
   5  -5   0    8.20    1.10
  -5  -5   0    7.20    1.40
  -6   5   0   -0.80    0.90
  -6  -5   0   -1.60    1.70
   6  -5   0   -0.40    1.20
  -7  -5   0   48.20    3.40
   7  -5   0   44.80    3.10
  -7  -5   0   46.50    3.70
  -7   5   0   47.00    2.60
  -8  -5   0   -1.80    2.30
  -8  -5   0    1.30    1.80
  -8   5   0    0.80    1.60
  -9   5   0  422.96   11.30
  -9  -5   0  419.46   12.10
  -9  -5   0  419.86   12.60
 -10  -5   0    0.50    2.90
 -10  -5   0   -2.40    2.30
 -11  -5   0    7.30    2.80
 -11  -5   0    5.80    3.20
 -12  -5   0    5.30    3.40
 -12  -5   0   -5.10    3.10
 -13  -5   0   82.49    7.60
 -15  -5   0   41.20    6.80
   0   6   0  246.78    6.60
   0  -6   0  248.78    6.40
   0  -6   0  246.08    6.60
   0   6   0  222.38    6.30
  -1  -6   0    0.60    0.80
  -1  -6   0   -0.20    0.90
   1   6   0    0.90    0.90
  -1   6   0    0.00    0.70
  -1   6   0    0.10    0.80
   1  -6   0    0.70    0.70
   1  -6   0   -0.10    0.80
   2   6   0  931.41   22.60
  -2  -6   0  945.21   22.60
   2  -6   0  913.01   22.60
  -2  -6   0  927.41   22.60
  -2   6   0  969.90   22.30
   2  -6   0  924.91   22.30
   2  -6   0  938.81   22.10
   3  -6   0    1.10    1.00
   3  -6   0    0.90    0.70
  -3  -6   0    0.90    1.10
  -3  -6   0    0.20    1.30
   3   6   0   -0.30    0.90
   3  -6   0    0.10    0.80
   4  -6   0   12.20    1.50
   4  -6   0   15.70    1.50
  -4  -6   0   17.40    1.90
  -4  -6   0   19.30    1.90
  -4   6   0   16.50    1.40
   4   6   0   18.40    1.80
   4  -6   0   17.20    1.30
   5  -6   0   -0.80    1.00
  -5  -6   0    2.20    1.50
  -5  -6   0    0.70    1.10
  -5   6   0    1.30    0.90
   5  -6   0   -0.20    0.70
   6  -6   0  141.09    4.10
  -6   6   0  134.49    4.20
   6  -6   0  129.59    4.20
  -6  -6   0  130.09    5.30
  -6  -6   0  135.39    5.00
  -7   6   0   -0.50    1.20
   7  -6   0    1.00    1.10
   7  -6   0   -1.20    1.60
  -7  -6   0   -0.50    2.10
  -7  -6   0    0.60    1.70
  -8  -6   0  193.38    6.90
  -8   6   0  190.48    5.90
  -8  -6   0  196.48    7.50
  -9  -6   0   -3.10    2.60
  -9  -6   0   -0.50    2.20
  -9   6   0   -0.30    1.70
 -10  -6   0   22.40    3.80
 -10   6   0   20.70    2.60
 -10  -6   0   22.30    3.30
 -11  -6   0    1.90    2.90
 -12  -6   0   78.29    6.50
 -12  -6   0  110.19    7.20
 -13  -6   0   -3.10    3.80
 -13  -6   0    0.70    4.30
 -14  -6   0  221.98   11.30
 -15  -6   0   14.50    5.90
   0  -7   0   -0.20    0.90
   0  -7   0    0.00    0.90
   0   7   0   -0.50    1.00
   1  -7   0  876.01   20.40
   1   7   0  853.31   20.80
  -1  -7   0  858.61   20.60
   1  -7   0  822.82   20.50
  -1  -7   0  870.31   20.80
   1  -7   0  880.71   20.90
  -1   7   0  875.21   20.80
  -1   7   0  787.92   20.40
   2  -7   0   -0.80    0.70
   2  -7   0    0.90    1.00
  -2  -7   0    0.70    1.00
  -2   7   0   -0.50    0.80
  -2  -7   0   -1.50    1.00
   2  -7   0   -1.00    0.80
   2   7   0    0.10    1.10
   3  -7   0  590.74   14.80
  -3  -7   0  593.04   14.80
  -3   7   0  591.34   14.30
  -3  -7   0  594.64   14.90
   3  -7   0  564.14   14.30
   3  -7   0  596.24   14.20
   3   7   0  564.74   14.80
   4  -7   0   -0.90    1.10
  -4  -7   0    1.40    1.10
   4  -7   0    0.80    0.80
   4  -7   0   -0.50    1.10
  -4  -7   0    0.40    1.30
  -5  -7   0  127.49    5.00
   5  -7   0  123.09    4.00
   5  -7   0  128.49    4.60
  -5  -7   0  127.99    4.60
  -5   7   0  123.19    3.80
   5  -7   0  123.49    3.80
   6  -7   0   -0.50    1.00
  -6  -7   0   -0.90    1.90
   6  -7   0    1.50    1.30
  -6  -7   0   -1.50    1.40
  -6   7   0    1.00    1.10
  -7   7   0  121.99    4.10
   7  -7   0  112.59    4.30
  -7  -7   0  122.19    5.10
   7  -7   0  127.59    4.00
  -7  -7   0  115.99    5.50
  -8   7   0    0.50    1.50
  -8  -7   0   -2.10    2.00
   8  -7   0    0.40    1.30
  -8  -7   0   -1.00    2.70
  -9  -7   0   36.10    4.20
  -9   7   0   31.20    3.10
  -9  -7   0   27.40    3.80
   9  -7   0   31.30    2.70
 -10  -7   0   -0.20    2.70
 -10  -7   0    2.20    3.10
 -11  -7   0   38.90    4.20
 -11  -7   0   32.60    4.70
 -12  -7   0   -5.10    3.60
 -12  -7   0   -2.60    3.60
 -13  -7   0    7.80    4.70
 -13  -7   0    0.90    4.20
 -14  -7   0   11.10    5.20
   0  -8   0  289.47    7.80
   0   8   0  291.27    8.20
   0  -8   0  302.87    8.20
   1  -8   0   -1.30    1.10
   1  -8   0    0.70    0.80
  -1  -8   0    0.10    1.00
  -1  -8   0    0.00    1.10
   1   8   0   -0.20    1.20
  -1   8   0    0.40    1.20
  -2  -8   0  141.99    4.80
   2  -8   0  143.39    4.70
  -2  -8   0  144.99    4.70
   2  -8   0  131.59    4.50
   2   8   0  135.99    4.80
   2  -8   0  141.59    4.10
   3  -8   0    0.40    1.10
   3  -8   0    1.30    0.90
  -3   8   0   -0.50    1.10
   3  -8   0    0.90    1.20
  -3  -8   0    0.80    1.40
  -3  -8   0    0.10    1.20
   4  -8   0    3.30    1.30
  -4  -8   0    3.50    1.30
  -4  -8   0    3.00    1.60
   4  -8   0    4.00    1.00
   4  -8   0    2.30    1.30
  -5  -8   0    0.80    1.80
   5  -8   0    0.80    1.40
   5  -8   0    0.60    1.00
   5  -8   0    0.20    1.40
  -6  -8   0  109.19    5.20
   6  -8   0  121.79    4.80
  -6   8   0  109.79    3.70
   6  -8   0  110.19    3.60
   6  -8   0  104.09    3.90
  -6  -8   0  100.79    4.70
  -7  -8   0    2.10    1.90
  -7   8   0    0.20    1.30
   7  -8   0   -0.30    2.30
  -7  -8   0   -1.70    2.30
   7  -8   0    0.00    1.30
   8  -8   0  369.86    9.60
  -8  -8   0  377.76   11.10
  -8  -8   0  365.46   11.60
  -8   8   0  348.57    9.60
  -9  -8   0   -3.40    2.30
  -9  -8   0    0.00    3.10
 -10  -8   0  121.89    7.00
 -10  -8   0  129.09    6.60
 -11  -8   0    8.40    3.80
 -11  -8   0    1.60    3.20
 -12  -8   0   26.90    4.90
 -12  -8   0   27.20    4.70
 -13  -8   0   13.20    4.70
 -14  -8   0   97.79    8.70
   0   9   0   -1.20    1.40
   0  -9   0   -0.10    0.90
   0  -9   0    1.40    1.20
   1   9   0   37.80    3.10
   1  -9   0   42.70    2.80
   1  -9   0   35.80    2.10
  -1  -9   0   38.20    2.60
  -1  -9   0   41.70    2.60
  -1   9   0   44.10    3.10
   2  -9   0   -0.40    0.90
  -2  -9   0    0.10    1.20
  -2  -9   0    0.00    1.40
  -2   9   0   -0.20    1.30
   2  -9   0    0.40    1.30
  -3  -9   0  126.89    4.80
   3  -9   0  126.69    4.70
  -3  -9   0  125.19    4.80
   3  -9   0  128.49    4.00
  -4  -9   0    1.20    1.70
   4  -9   0    0.00    1.40
   4  -9   0    2.10    1.10
  -4  -9   0   -0.70    1.70
   4  -9   0   -0.40    1.60
   5  -9   0    6.20    1.70
  -5  -9   0    4.10    2.00
   5  -9   0    7.00    1.90
   5  -9   0    6.80    1.30
  -5  -9   0    6.50    1.90
  -6  -9   0   -2.40    2.20
  -6  -9   0   -0.10    1.70
   6  -9   0   -0.10    1.20
   6  -9   0   -1.40    1.60
   6  -9   0    1.10    1.80
   7  -9   0   28.30    3.10
  -7  -9   0   23.60    2.80
   7  -9   0   24.00    2.30
  -7  -9   0   27.40    3.40
  -8  -9   0   -0.30    2.80
  -8  -9   0   -0.50    2.40
  -9  -9   0   19.90    3.40
 -10  -9   0    1.10    3.50
 -10  -9   0    5.20    3.10
 -11  -9   0  249.68    9.80
 -11  -9   0  238.58   10.10
 -12  -9   0    1.10    4.40
 -12  -9   0    3.90    4.30
 -13  -9   0   10.40    4.70
 -14  -9   0   10.70    5.90
   0 -10   0  294.57    8.20
   0 -10   0  293.97    8.60
   1 -10   0    1.60    1.60
  -1 -10   0   -0.40    1.30
  -1 -10   0    0.00    1.30
   2 -10   0  273.57    7.40
  -2 -10   0  260.97    8.00
   2 -10   0  267.57    8.10
  -2 -10   0  270.17    8.10
  -3 -10   0    1.20    1.70
   3 -10   0    0.20    1.50
   3 -10   0    0.80    1.20
   4 -10   0  396.46   11.40
  -4 -10   0  416.56   11.70
   4 -10   0  418.96   10.50
  -4 -10   0  415.86   11.60
  -5 -10   0   -0.70    2.00
   5 -10   0    2.20    2.00
  -5 -10   0   -1.30    2.10
   5 -10   0    1.30    1.30
  -6 -10   0   52.19    4.50
  -6 -10   0   54.69    4.20
   6 -10   0   52.39    2.80
   6 -10   0   54.69    4.20
  -7 -10   0   -1.50    2.60
   7 -10   0    2.30    1.50
   7 -10   0    2.00    2.90
  -7 -10   0   -1.80    2.20
   8 -10   0   39.90    4.60
  -8 -10   0   40.30    4.80
  -8 -10   0   40.70    5.10
  -9 -10   0    9.50    3.30
  -9 -10   0   -0.40    3.30
 -10 -10   0  159.08    8.30
 -10 -10   0  163.08    8.00
 -11 -10   0   -0.80    3.70
 -11 -10   0    3.10    3.60
 -12 -10   0  331.87   12.80
 -13 -10   0    4.70    4.90
   0 -11   0   -0.80    1.40
   0 -11   0    2.60    1.60
   1 -11   0    2.70    1.50
  -1 -11   0    3.40    1.90
   1 -11   0    5.60    2.00
  -1 -11   0    2.60    1.70
   2 -11   0    1.80    1.40
  -2 -11   0   -1.60    2.10
  -2 -11   0   -1.60    1.70
   2 -11   0   -1.60    1.80
  -3 -11   0    1.60    2.00
  -3 -11   0   -0.30    1.90
   3 -11   0    1.70    1.50
   3 -11   0   -0.80    1.80
   4 -11   0   -0.20    1.40
   4 -11   0   -2.70    1.80
  -4 -11   0   -1.10    2.10
  -4 -11   0   -0.70    1.90
  -5 -11   0   56.89    4.50
   5 -11   0   46.80    4.10
   5 -11   0   57.89    3.00
  -5 -11   0   50.09    4.30
   6 -11   0    5.30    3.30
  -6 -11   0   -1.80    2.50
   6 -11   0   -1.70    1.40
  -6 -11   0    1.80    2.30
   7 -11   0   43.30    4.70
  -7 -11   0   44.30    4.90
  -7 -11   0   32.90    3.50
  -8 -11   0    1.80    2.60
  -8 -11   0    1.10    3.00
  -9 -11   0   68.49    6.40
  -9 -11   0   53.99    5.90
 -10 -11   0   -0.60    3.70
 -10 -11   0   -2.10    3.30
 -11 -11   0  114.79    8.00
 -12 -11   0   -2.30    4.70
   0 -12   0   38.60    3.20
   0 -12   0   35.50    3.60
   1 -12   0   -0.60    2.50
   1 -12   0    0.80    1.70
  -1 -12   0    0.70    1.90
  -1 -12   0   -0.90    1.80
  -2 -12   0  196.88    7.00
  -2 -12   0  196.38    7.00
   2 -12   0  194.58    6.20
   3 -12   0    0.90    1.60
  -3 -12   0   -2.60    2.00
   3 -12   0    0.40    3.20
  -3 -12   0   -1.80    2.00
  -4 -12   0  324.07   10.20
   4 -12   0  310.57   10.00
  -4 -12   0  328.47   10.20
  -5 -12   0   -0.80    2.60
  -5 -12   0    2.20    2.50
   5 -12   0   -0.10    1.60
   5 -12   0    0.40    2.20
  -6 -12   0  485.15   14.60
   6 -12   0  492.45   14.20
  -6 -12   0  510.25   14.40
  -7 -12   0    2.10    3.00
  -7 -12   0   -2.10    2.70
  -8 -12   0    4.40    3.60
  -8 -12   0    0.10    3.10
  -9 -12   0   -0.50    3.40
  -9 -12   0   -4.70    3.50
 -10 -12   0  153.88    8.70
 -11 -12   0    6.60    4.30
 -12 -12   0   62.79    8.10
   0 -13   0    1.10    2.10
   0 -13   0    1.20    2.20
  -1 -13   0    6.50    2.20
  -1 -13   0    8.10    2.40
   1 -13   0    2.40    2.10
   1 -13   0    6.10    2.00
   2 -13   0   -0.60    2.40
  -2 -13   0    0.00    2.10
   2 -13   0   -1.50    1.70
  -2 -13   0    0.40    2.30
  -3 -13   0   27.20    3.30
  -3 -13   0   34.40    3.70
   3 -13   0   26.30    3.20
   3 -13   0   28.50    3.20
   4 -13   0   -0.90    2.60
   4 -13   0    1.70    1.80
  -4 -13   0   -1.70    2.60
  -4 -13   0    1.90    2.60
   5 -13   0    0.30    2.20
  -5 -13   0   -1.20    2.60
  -5 -13   0    2.00    2.50
   5 -13   0   -0.40    2.60
  -6 -13   0   -2.80    2.80
  -6 -13   0   -0.80    2.90
  -7 -13   0  151.28    7.40
  -7 -13   0  147.29    7.60
  -8 -13   0    1.20    3.20
  -8 -13   0   -1.80    3.30
  -9 -13   0   45.00    5.30
 -10 -13   0   -4.10    3.90
 -11 -13   0   42.40    6.00
   0 -14   0   32.60    3.90
   0 -14   0   38.00    3.80
  -1 -14   0    2.80    2.50
   1 -14   0   -3.30    2.50
   1 -14   0   -3.30    2.10
  -1 -14   0   -1.20    2.40
   2 -14   0  778.32   20.70
  -2 -14   0  787.62   20.60
   2 -14   0  790.22   19.80
  -2 -14   0  762.32   20.70
   3 -14   0    3.20    2.90
  -3 -14   0   -1.30    2.80
  -3 -14   0   -1.50    2.60
   3 -14   0   -2.30    2.00
   4 -14   0    0.60    3.40
  -4 -14   0    1.40    3.00
  -4 -14   0    0.60    2.90
   4 -14   0    0.70    2.10
  -5 -14   0    2.60    2.70
  -5 -14   0    0.70    3.00
  -6 -14   0  132.79    7.50
  -6 -14   0  137.69    7.20
  -7 -14   0   -2.10    3.10
  -7 -14   0   -0.10    3.60
  -8 -14   0   -3.10    3.90
  -9 -14   0   -7.50    4.00
 -10 -14   0  261.47   11.70
   0 -15   0   -0.70    2.70
   0 -15   0    1.60    2.50
   1 -15   0  158.18    6.60
  -1 -15   0  153.38    6.70
  -1 -15   0  159.48    7.40
   1 -15   0  162.38    7.30
  -2 -15   0    0.90    2.70
  -2 -15   0   -4.30    2.80
   2 -15   0   -1.90    3.00
   2 -15   0   -0.50    2.40
   3 -15   0   -0.30    2.50
  -3 -15   0    7.10    3.00
  -3 -15   0    0.60    3.30
  -4 -15   0   -1.90    3.20
  -4 -15   0   -2.20    3.20
  -5 -15   0  152.08    7.90
  -5 -15   0  181.48    8.20
  -7 -15   0   29.00    5.00
  -8 -15   0   -1.20    4.10
  -9 -15   0   -7.40    4.30
   0 -16   0  205.58    8.10
  -1 -16   0    0.00    3.20
   1 -16   0   -1.80    2.80
   2 -16   0   16.20    3.30
  -3 -16   0   -4.30    3.30
  -4 -16   0  303.67   11.30
  -5 -16   0   -4.20    4.00
  -6 -16   0   -6.10    3.90
  -7 -16   0    1.10    4.40
  -8 -16   0  109.59    8.60
   0 -17   0   -5.30    3.50
   1 -17   0    0.80    3.50
  -1 -17   0   -4.30    3.50
  -2 -17   0   -3.60    3.70
  -3 -17   0  123.79    7.60
  -4 -17   0   -3.10    3.90
  -5 -17   0    7.10    4.50
  -6 -17   0   -2.10    4.40
  -7 -17   0    9.30    5.20
   0 -18   0   -5.30    4.20
  -1 -18   0   -2.70    4.30
  -2 -18   0   97.19    8.00
  -3 -18   0   -1.80    4.30
  -4 -18   0  101.19    8.90
  -5 -18   0  -10.00    4.40
  -6 -18   0   17.30    5.50
  -1 -19   0   -5.60    4.90
  -2 -19   0   -5.00    5.00
  -3 -19   0   21.10    5.70
  -4 -19   0  -10.50    5.00
  -2   0   1    0.20    0.50
  -2   0   1   -1.20    0.60
   2   0   1   -0.10    0.50
   2   0   1    0.70    0.40
   2   0  -1   -0.90    0.60
   2   0  -1    0.20    0.50
  -2   0  -1    1.20    0.50
  -2   0  -1    1.40    0.50
   3   0  -1    0.50    0.50
   3   0   1   -0.40    0.40
  -3   0   1    0.60    0.40
   3   0   1   -0.60    0.40
  -3   0   1    0.50    0.50
  -3   0  -1   -0.10    0.40
  -3   0  -1   -0.60    0.40
   3   0  -1    0.00    0.50
  -4   0   1    0.20    0.70
  -4   0  -1    0.30    0.90
   4   0   1   -0.80    0.60
   4   0   1    0.20    0.70
  -4   0  -1   -1.10    0.60
   4   0  -1    0.60    0.90
   4   0  -1    0.00    0.70
  -4   0   1   -0.50    0.70
   5   0  -1    1.00    1.40
   5   0   1    1.00    1.00
   5   0  -1    0.10    0.90
  -5   0  -1   -1.00    1.00
  -5   0  -1   -0.40    1.30
   5   0   1    0.50    1.00
  -5   0   1    1.20    1.10
  -5   0   1   -2.00    1.20
   6   0  -1   -2.30    1.10
  -6   0   1    0.30    1.10
  -6   0   1   -0.80    1.10
  -6   0  -1    1.70    1.20
  -6   0  -1    0.40    1.20
  -7   0   1   -1.20    1.10
  -7   0   1    1.10    1.20
  -7   0  -1    1.60    1.60
  -7   0  -1    0.60    1.10
  -8   0  -1    0.90    1.90
  -8   0   1   -1.60    1.60
  -8   0  -1    0.10    1.60
  -9   0  -1    0.40    1.90
  -9   0   1    0.10    1.90
  -9   0  -1    4.70    1.90
  -9   0   1    2.30    2.00
 -10   0  -1    3.70    2.20
 -10   0  -1   -3.80    2.10
 -10   0   1   -3.70    2.10
 -10   0   1   -3.50    2.10
 -11   0   1    2.60    2.50
 -11   0  -1   -4.30    2.30
 -12   0   1    0.80    2.80
 -12   0  -1   -6.00    2.60
 -13   0   1    3.20    3.50
 -13   0  -1    0.00    3.20
 -14   0   1    0.90    3.80
  -1   1   1    3.70    0.40
   1   1  -1    3.50    0.40
   1   1  -1    4.10    0.40
   1  -1  -1    3.40    0.40
   1   1   1    3.70    0.30
   1   1   1    3.00    0.30
  -2   1   1  572.04   13.70
   2  -1   1  599.04   13.50
  -2  -1  -1  574.94   13.70
   2   1  -1  571.74   13.90
   2  -1   1  555.64   13.60
  -2  -1  -1  568.44   13.70
   2   1  -1  583.14   13.70
   2  -1  -1  580.44   13.70
   2  -1  -1  581.44   13.70
  -2  -1   1  579.84   13.70
  -2  -1   1  571.64   13.90
   2   1   1  551.34   13.60
  -2   1  -1  593.84   13.50
   2   1   1  580.24   13.70
  -3   1   1 1392.86   31.90
   3   1  -1 1358.36   32.00
   3   1  -1 1367.16   32.10
  -3  -1  -1 1338.67   31.90
  -3  -1  -1 1345.27   31.90
   3  -1   1 1405.86   31.70
   3  -1   1 1315.07   31.90
  -3   1  -1 1384.46   31.70
   3  -1  -1 1382.46   31.90
   3  -1  -1 1333.57   31.90
  -3  -1   1 1366.56   32.00
  -3  -1   1 1352.56   32.10
   3   1   1 1362.46   31.80
   3   1   1 1354.66   31.90
  -4  -1  -1  176.08    5.00
   4   1  -1  173.48    5.00
   4  -1   1  180.08    4.70
   4   1  -1  168.18    5.00
  -4   1   1  176.68    5.00
  -4  -1  -1  176.68    4.90
   4  -1   1  168.28    4.90
  -4   1   1  179.38    4.90
  -4  -1   1  186.58    5.00
   4  -1  -1  170.58    4.90
   4   1   1  171.98    4.80
   4  -1  -1  181.48    5.00
  -4  -1   1  173.18    5.10
   4   1   1  172.78    4.90
  -4   1  -1  176.78    4.70
  -5  -1  -1  117.99    3.90
  -5   1   1  112.09    3.80
  -5   1   1  111.49    3.80
   5  -1   1  106.89    3.70
  -5  -1  -1  112.49    4.10
   5  -1   1  113.19    3.60
   5  -1  -1  103.19    3.90
  -5  -1   1  104.39    4.00
   5   1   1  102.59    3.60
  -5   1  -1  116.19    3.80
  -5   1  -1  107.49    3.60
   5  -1  -1  113.09    3.80
  -5  -1   1  112.69    3.80
   5   1   1  108.29    3.80
  -6   1   1  201.28    5.90
  -6  -1  -1  202.08    6.00
  -6  -1  -1  198.98    6.10
  -6   1   1  200.68    6.00
   6  -1   1  190.48    5.60
   6   1  -1  189.38    6.00
  -6  -1   1  197.98    6.10
   6  -1  -1  188.88    6.00
  -6   1  -1  202.38    6.00
  -6  -1   1  212.18    6.00
  -6   1  -1  202.88    5.70
  -7   1   1    8.20    1.40
  -7  -1  -1   10.20    2.00
  -7  -1  -1    5.80    1.50
  -7   1   1    8.60    1.60
  -7  -1   1    6.80    1.70
  -7  -1   1    8.40    1.60
  -7   1  -1    7.40    1.40
  -8  -1  -1    8.50    2.00
  -8  -1  -1   14.50    2.10
  -8   1   1   12.50    2.00
  -8   1  -1   11.40    1.80
  -8  -1   1   10.80    2.00
  -9   1   1   82.19    4.20
  -9  -1  -1   86.89    4.30
  -9  -1  -1   82.89    4.60
  -9  -1   1   91.89    4.70
  -9  -1   1   83.69    4.50
  -9   1  -1   80.09    4.10
 -10  -1  -1    4.10    2.20
 -10  -1  -1    0.80    2.30
 -10   1   1   -0.50    2.20
 -10  -1   1   -2.80    2.20
 -10   1  -1   -3.90    2.00
 -10  -1   1    2.00    2.20
 -11  -1  -1   35.20    3.70
 -11   1   1   31.60    3.40
 -11  -1  -1   38.80    3.70
 -11  -1   1   39.80    3.90
 -11  -1   1   36.90    4.40
 -11   1  -1   31.00    3.40
 -12   1   1    7.80    2.90
 -12  -1  -1    2.70    3.00
 -12  -1  -1    2.30    3.10
 -12   1  -1    4.00    2.90
 -12  -1   1   -1.00    3.00
 -12  -1   1    0.00    3.00
 -13  -1  -1    8.80    3.70
 -13   1   1   10.20    3.60
 -13   1  -1    7.40    3.40
 -13  -1   1    4.50    3.40
 -14  -1  -1   12.20    5.10
 -14  -1   1   15.80    4.50
   0  -2   1    0.20    0.20
   0   2   1   -0.30    0.20
   0  -2   1    0.20    0.20
   0  -2  -1    0.20    0.30
   0  -2  -1    0.20    0.20
   0   2  -1    0.10    0.20
   0   2   1    0.10    0.20
   0  -2  -1    0.10    0.20
   0   2  -1   -0.30    0.20
   1   2  -1  261.97    6.40
  -1   2   1  255.27    6.40
  -1  -2  -1  254.97    6.40
  -1   2   1  269.97    6.40
  -1  -2  -1  256.67    6.40
   1   2  -1  267.47    6.50
  -1  -2   1  264.77    6.50
   1   2   1  264.87    6.40
   1  -2  -1  261.87    6.30
  -1  -2   1  258.07    6.40
   1   2   1  250.57    6.40
   1  -2  -1  262.37    6.40
  -1   2  -1  260.47    6.10
  -2   2   1 1206.78   28.40
  -2  -2  -1 1181.78   28.40
   2  -2   1 1236.48   28.10
  -2  -2  -1 1209.48   28.40
   2   2  -1 1207.28   28.50
   2   2  -1 1258.37   28.50
   2   2   1 1251.87   28.40
   2  -2  -1 1233.38   28.40
   2   2   1 1204.28   28.40
  -2   2  -1 1183.68   28.10
  -2  -2   1 1221.08   28.50
  -2  -2   1 1186.98   28.60
  -3  -2  -1   47.00    1.80
   3   2  -1   51.39    1.90
  -3   2   1   45.80    1.70
   3  -2   1   50.59    1.50
   3   2  -1   46.50    1.90
  -3  -2  -1   47.00    1.80
   3   2   1   48.50    1.80
  -3  -2   1   46.80    1.90
   3   2   1   45.50    1.70
  -3  -2   1   48.10    2.10
   3  -2  -1   50.49    1.70
  -3   2  -1   46.60    1.50
   4  -2   1   47.60    2.20
  -4  -2  -1   56.99    2.40
   4   2  -1   49.50    2.60
  -4   2   1   52.39    2.10
   4  -2   1   54.49    2.00
  -4  -2  -1   55.89    2.30
  -4  -2   1   56.79    2.80
   4   2   1   48.80    2.10
  -4  -2   1   55.79    2.30
   4   2   1   53.59    2.30
  -4   2  -1   52.09    1.90
   4  -2  -1   55.19    2.30
   4  -2  -1   50.39    2.10
  -5  -2  -1  191.38    5.80
   5  -2   1  194.98    5.20
   5  -2   1  174.28    5.40
   5   2  -1  182.68    5.60
  -5  -2  -1  186.88    5.50
  -5   2   1  188.28    5.30
   5   2   1  181.08    5.50
  -5  -2   1  186.68    5.90
  -5  -2   1  191.38    5.50
  -5   2  -1  195.78    5.20
   5  -2  -1  180.18    5.40
   5  -2  -1  191.08    5.50
   6  -2   1    1.90    1.20
  -6   2   1    2.40    1.00
  -6  -2  -1    3.40    1.30
   6   2  -1    3.50    1.40
  -6  -2  -1    3.50    1.70
   6  -2  -1    2.90    1.30
  -6  -2   1    3.10    1.30
  -6   2  -1    3.70    1.00
  -6  -2   1    2.20    1.50
  -7   2   1  101.89    3.80
  -7  -2  -1  103.39    4.10
  -7  -2  -1  101.19    4.60
  -7  -2   1  106.79    4.20
  -7  -2   1  102.29    4.30
  -7   2  -1  107.49    3.80
  -8   2   1   73.09    4.20
  -8  -2  -1   86.39    3.90
  -8  -2  -1   80.69    4.40
  -8  -2   1   73.79    4.40
  -8   2  -1   87.29    3.70
  -8  -2   1   80.69    4.20
  -9  -2  -1   22.70    2.90
  -9  -2  -1   21.70    2.60
  -9   2   1   22.80    2.80
  -9  -2   1   20.00    2.50
  -9  -2   1   18.20    2.80
 -10   2   1    2.80    2.00
 -10  -2  -1    3.20    2.10
 -10  -2  -1    4.10    2.50
 -10  -2   1    0.30    2.30
 -10  -2   1   -0.10    2.30
 -10   2  -1    0.60    2.00
 -11  -2  -1    5.00    2.70
 -11   2   1    4.90    2.40
 -11  -2  -1    6.40    3.00
 -11   2  -1   10.10    2.60
 -11  -2   1   10.50    3.00
 -11  -2   1    3.70    2.70
 -12  -2  -1    8.80    3.30
 -12  -2  -1    9.40    3.40
 -12   2   1    8.10    3.00
 -12  -2   1   10.30    3.40
 -12   2  -1   15.50    2.90
 -12  -2   1    7.30    3.20
 -13  -2  -1    9.40    4.70
 -13   2   1    4.20    3.30
 -13  -2  -1    4.00    3.80
 -13  -2   1    8.50    3.80
 -14  -2  -1   28.00    4.80
 -14  -2  -1   23.70    4.60
 -14  -2   1   24.20    4.60
 -15  -2   1    3.90    5.00
   0   3  -1    0.10    0.40
   0   3   1   -0.30    0.40
   0   3  -1    0.50    0.40
   0  -3   1   -0.20    0.40
   0   3   1    0.70    0.40
   0  -3  -1    0.10    0.40
   0  -3  -1    0.40    0.40
   0  -3   1    0.30    0.40
   1   3  -1 1548.25   36.50
   1  -3   1 1551.34   36.50
  -1  -3  -1 1549.94   36.50
  -1   3   1 1553.84   36.40
  -1  -3  -1 1579.04   36.50
  -1   3   1 1613.24   36.50
   1   3  -1 1523.35   36.50
   1  -3   1 1587.94   36.40
  -1   3   1 1597.04   36.50
   1   3   1 1517.65   36.50
   1  -3  -1 1572.94   36.50
   1  -3  -1 1534.75   36.40
   1  -3  -1 1612.04   36.50
  -1   3  -1 1568.34   36.50
  -1  -3   1 1552.94   36.50
  -1  -3   1 1538.65   36.50
   1   3   1 1616.54   36.50
  -1   3  -1 1572.44   36.20
   2  -3   1  520.65   12.20
  -2  -3  -1  531.35   12.60
  -2   3   1  514.15   12.50
  -2  -3  -1  522.95   12.60
   2   3  -1  519.65   12.70
   2   3  -1  527.55   12.70
   2  -3   1  530.95   12.20
   2   3   1  525.15   12.60
  -2  -3   1  519.05   12.70
   2  -3  -1  532.45   12.50
   2   3   1  508.05   12.60
  -2   3  -1  511.35   12.20
   2  -3  -1  519.95   12.50
   3   3  -1  314.87    8.40
   3  -3   1  348.07    7.90
  -3   3   1  329.67    8.20
  -3  -3  -1  326.77    8.30
   3   3  -1  332.17    8.40
  -3  -3  -1  331.07    8.40
   3   3   1  300.37    8.20
  -3  -3   1  339.77    8.40
   3   3   1  331.47    8.30
  -3  -3   1  332.27    8.60
  -3   3  -1  316.87    7.80
   3  -3  -1  336.37    8.20
  -4  -3  -1  335.47    8.70
   4  -3   1  349.96    8.30
  -4   3   1  324.87    8.50
   4   3  -1  332.47    8.80
  -4  -3  -1  339.37    8.90
  -4  -3   1  349.87    9.20
  -4   3  -1  330.27    8.20
   4  -3  -1  341.17    8.50
   4   3   1  331.47    8.70
  -4  -3   1  333.67    8.80
   5   3  -1    4.40    1.10
  -5  -3  -1    2.60    1.20
  -5   3   1    2.00    0.90
  -5  -3  -1    4.20    1.40
   5  -3   1    1.60    1.20
   5  -3   1    4.10    1.10
  -5   3  -1    2.40    0.80
   5  -3  -1   -0.10    1.10
  -5  -3   1    3.10    1.70
   5  -3  -1    1.90    1.00
   5   3   1    3.10    1.20
  -5  -3   1    2.10    1.20
  -6  -3  -1   -0.50    1.10
  -6   3   1    0.80    1.00
   6   3  -1    3.50    1.40
   6  -3   1   -0.70    1.20
   6  -3  -1   -0.50    1.20
  -6  -3   1   -2.00    1.00
   6  -3  -1    0.00    1.20
  -6   3  -1    1.30    0.90
  -6  -3   1    0.20    1.60
  -7   3   1   14.70    1.70
  -7  -3  -1   13.80    2.20
  -7  -3  -1   15.00    1.90
   7  -3   1   11.60    1.80
  -7   3  -1   11.20    1.50
  -7  -3   1   11.30    2.20
  -7  -3   1   15.00    1.90
  -8  -3  -1   36.80    3.80
  -8  -3  -1   35.00    3.10
  -8   3   1   39.20    2.90
  -8  -3   1   33.70    3.40
  -8   3  -1   34.00    2.70
  -8  -3   1   34.20    3.30
  -9  -3  -1   27.20    3.30
  -9  -3  -1   31.70    3.00
  -9   3   1   28.80    3.00
  -9   3  -1   24.90    2.50
  -9  -3   1   32.60    4.00
  -9  -3   1   29.60    3.40
 -10  -3  -1   83.39    4.90
 -10   3   1   85.69    4.40
 -10  -3  -1   84.69    5.50
 -10  -3   1   79.29    5.10
 -10   3  -1   79.79    4.40
 -10  -3   1   91.79    5.10
 -11  -3  -1    5.40    2.50
 -11   3   1   -3.40    2.30
 -11  -3  -1    7.00    3.00
 -11  -3   1    4.00    3.10
 -11   3  -1    3.10    2.30
 -11  -3   1    1.80    2.60
 -12  -3  -1    5.70    3.10
 -12   3   1    2.10    2.90
 -12  -3  -1    6.20    3.50
 -12  -3   1    2.30    3.20
 -12  -3   1   10.20    3.40
 -13  -3  -1   73.59    6.40
 -13  -3   1   69.79    6.40
 -13  -3   1   70.29    6.70
 -14  -3  -1    1.60    4.60
 -14  -3  -1    8.60    4.20
 -14  -3   1    0.20    4.30
 -15  -3  -1   11.10    5.10
 -15  -3   1    4.90    4.80
   0   4  -1    0.70    0.50
   0  -4  -1    0.30    0.40
   0  -4   1   -0.20    0.30
   0   4   1    0.20    0.40
   0   4   1   -0.20    0.40
   0  -4  -1    0.30    0.40
   0   4  -1   -0.30    0.30
   0  -4   1    0.50    0.50
  -1  -4  -1   76.79    2.40
   1   4  -1   77.39    2.40
  -1   4   1   77.59    2.30
  -1   4   1   77.99    2.50
   1  -4   1   73.69    2.10
   1   4  -1   68.99    2.30
   1  -4   1   74.19    2.40
  -1  -4  -1   76.79    2.40
  -1   4  -1   75.99    2.40
   1  -4  -1   72.69    2.20
   1   4   1   75.49    2.40
  -1  -4   1   76.79    2.40
   1  -4  -1   73.99    2.40
   1  -4  -1   74.79    2.40
   1   4   1   72.59    2.30
  -1  -4   1   71.69    2.40
  -1   4  -1   74.79    2.10
  -2   4   1    4.20    0.70
   2   4  -1    3.00    0.70
   2   4  -1    5.60    0.90
  -2  -4  -1    4.40    0.70
   2  -4   1    4.00    0.50
   2  -4   1    4.10    0.40
   2  -4   1    4.00    0.70
  -2  -4  -1    3.60    0.70
  -2   4   1    4.10    0.60
  -2   4  -1    3.90    0.50
   2  -4  -1    4.30    0.80
   2   4   1    3.00    0.70
   2  -4  -1    3.30    0.60
  -2  -4   1    3.60    0.90
   2  -4  -1    3.80    0.70
  -2  -4   1    3.80    0.80
   2   4   1    3.30    0.70
  -3   4   1    0.80    0.70
   3  -4   1    0.40    0.50
   3   4  -1    0.30    0.70
  -3  -4  -1    1.40    0.80
  -3  -4  -1    1.50    1.00
   3  -4   1    1.10    0.40
  -3  -4   1   -0.90    0.70
   3  -4  -1    0.90    0.60
   3  -4  -1    0.70    0.70
  -3  -4   1    1.60    1.30
   3   4   1    0.20    0.80
  -3   4  -1    0.30    0.40
   4   4  -1    0.40    1.00
  -4  -4  -1    0.60    1.00
  -4   4   1   -0.20    0.80
  -4  -4  -1    2.50    1.30
   4  -4   1    0.90    0.50
  -4   4  -1    0.40    0.60
   4  -4  -1   -0.60    0.80
  -4  -4   1    0.10    1.00
  -4  -4   1    3.20    1.70
   4   4   1    0.40    1.00
  -5  -4  -1   41.40    2.70
  -5  -4  -1   44.30    2.40
  -5   4   1   41.40    2.00
   5  -4   1   42.10    2.00
  -5  -4   1   39.20    2.40
  -5   4  -1   39.80    1.80
   5  -4  -1   45.10    2.20
  -6  -4  -1   49.90    2.70
  -6  -4  -1   45.50    3.20
   6  -4   1   49.10    2.60
   6   4  -1   46.40    3.10
  -6   4   1   49.20    2.40
  -6  -4   1   49.70    3.50
   6  -4  -1   48.50    2.70
  -6   4  -1   44.30    2.20
  -6  -4   1   50.49    2.90
   7  -4   1    1.70    1.60
  -7  -4  -1    2.20    2.00
  -7  -4  -1    1.60    1.50
  -7   4   1   -0.30    1.30
  -7   4  -1    1.70    1.20
  -7  -4   1    1.50    1.90
  -7  -4   1    3.10    1.50
  -8   4   1   50.99    3.20
  -8  -4  -1   49.30    3.50
  -8  -4  -1   47.70    4.00
  -8   4  -1   47.80    2.80
  -8  -4   1   44.50    4.00
  -8  -4   1   47.10    3.40
  -9   4   1    2.80    1.90
  -9  -4  -1   -0.20    1.90
  -9  -4  -1    0.00    2.60
  -9  -4   1   -1.30    2.30
  -9  -4   1    1.30    2.10
  -9   4  -1    4.80    1.80
 -10  -4  -1    6.20    2.40
 -10  -4  -1    1.60    3.00
 -10   4   1    5.70    2.30
 -10  -4   1    4.20    2.50
 -10   4  -1    2.00    2.80
 -10  -4   1    2.10    2.70
 -11   4   1    1.80    2.50
 -11  -4  -1    4.30    2.80
 -11  -4  -1    6.00    3.10
 -11  -4   1    2.30    2.80
 -11   4  -1    5.50    2.30
 -11  -4   1    2.80    2.70
 -12  -4  -1    6.70    3.10
 -12  -4  -1    2.30    3.50
 -12   4   1    2.20    3.40
 -12  -4   1    5.20    3.10
 -13  -4  -1   24.50    4.50
 -13  -4  -1   29.10    4.70
 -13  -4   1   28.50    4.50
 -14  -4  -1    1.80    4.20
 -14  -4  -1   12.00    4.70
 -14  -4   1    3.30    4.50
 -15  -4  -1    0.90    6.00
 -15  -4   1  -10.70    4.80
   0  -5  -1   -0.20    0.50
   0   5  -1   -0.10    0.50
   0   5  -1    0.10    0.60
   0  -5  -1   -0.50    0.60
   0  -5   1    0.70    0.70
   0   5   1    0.60    0.50
   0   5   1   -0.40    0.60
   0  -5   1    0.50    0.60
  -1  -5  -1   85.09    2.70
  -1  -5  -1   85.09    2.80
   1  -5   1   86.39    2.50
   1   5  -1   85.49    2.80
   1   5  -1   81.19    2.60
  -1   5   1   83.79    2.80
   1  -5   1   83.19    2.80
  -1   5   1   83.79    2.70
   1  -5  -1   79.59    2.70
  -1  -5   1   85.99    2.80
  -1  -5   1   84.89    2.90
   1  -5  -1   87.19    2.70
  -1   5  -1   83.09    2.50
   1  -5  -1   85.49    2.80
  -1   5  -1   85.29    2.80
   1   5   1   77.19    2.70
   1   5   1   83.49    2.90
  -2   5   1  244.88    6.30
   2  -5   1  238.48    6.00
   2  -5   1  241.48    6.50
  -2  -5  -1  243.08    6.50
   2  -5   1  246.48    6.10
  -2  -5  -1  232.08    6.50
  -2   5   1  241.48    6.30
  -2  -5   1  238.68    6.50
   2   5   1  241.18    6.50
  -2   5  -1  248.68    6.10
  -2  -5   1  247.38    6.60
   2  -5  -1  240.38    6.30
   2  -5  -1  239.08    6.50
   2  -5  -1  235.38    6.20
   3   5  -1  817.32   20.60
  -3  -5  -1  849.41   20.60
   3  -5   1  864.11   20.00
   3  -5   1  838.62   20.50
   3  -5   1  850.11   19.90
  -3   5   1  859.71   20.30
  -3  -5  -1  857.81   20.60
   3  -5  -1  858.51   20.40
   3  -5  -1  842.82   20.20
   3   5   1  854.71   20.60
   3  -5  -1  830.62   20.50
  -3  -5   1  875.81   20.70
   4   5  -1   42.20    2.40
   4  -5   1   41.70    1.70
  -4   5   1   43.50    2.00
  -4  -5  -1   44.00    2.70
   4  -5   1   42.50    1.60
   4  -5  -1   40.80    2.10
  -4   5  -1   43.80    1.70
  -4  -5   1   50.39    3.00
  -4  -5   1   45.30    2.40
   4   5   1   44.20    2.40
   4  -5  -1   41.80    1.90
   5  -5   1  137.39    3.80
   5  -5   1  141.89    3.90
  -5  -5  -1  140.69    4.90
  -5   5   1  137.89    4.20
  -5  -5  -1  139.79    4.60
   5   5  -1  138.29    4.80
  -5   5  -1  132.99    3.80
  -5  -5   1  135.19    4.60
   5  -5  -1  135.19    4.20
   5  -5  -1  138.09    4.10
  -5  -5   1  145.69    5.20
   6  -5   1   88.39    3.20
  -6  -5  -1   91.99    4.10
  -6   5   1   87.29    3.30
  -6  -5   1   82.79    4.30
  -6  -5   1   80.69    3.60
   6  -5  -1   86.89    3.40
  -6   5  -1   81.69    2.90
   7  -5   1   14.90    1.90
  -7   5   1   14.10    1.70
  -7  -5  -1   11.30    2.20
  -7  -5  -1   14.90    2.00
  -7  -5   1   11.60    2.00
  -7  -5   1    8.30    2.30
  -7   5  -1   15.10    1.90
  -8  -5  -1  166.68    6.60
  -8   5   1  166.58    5.60
  -8  -5  -1  166.18    6.00
   8  -5   1  157.18    5.50
  -8  -5   1  165.28    6.10
  -8  -5   1  167.28    6.80
  -8   5  -1  161.88    5.20
  -9  -5  -1   78.09    4.60
  -9  -5  -1   71.09    5.20
  -9   5   1   78.09    4.80
  -9  -5   1   71.39    5.10
  -9  -5   1   73.39    4.50
  -9   5  -1   71.69    3.70
 -10  -5  -1   56.09    4.70
 -10  -5  -1   57.59    5.10
 -10   5   1   54.29    4.10
 -10  -5   1   58.39    5.00
 -10  -5   1   56.39    4.80
 -10   5  -1   47.80    3.80
 -11   5   1   35.20    4.10
 -11  -5  -1   25.60    4.00
 -11  -5  -1   27.20    3.40
 -11  -5   1   35.90    4.10
 -11  -5   1   29.70    3.60
 -12  -5  -1   10.90    3.50
 -12  -5  -1   14.20    3.90
 -12  -5   1    7.20    3.60
 -12  -5   1   14.70    3.80
 -13  -5  -1   -1.80    3.40
 -13  -5  -1    4.80    4.20
 -13  -5   1    1.10    3.90
 -13  -5   1    6.10    3.60
 -14  -5  -1    8.00    4.90
 -14  -5  -1    3.40    4.20
 -14  -5   1    5.90    4.90
 -15  -5  -1   27.80    6.00
 -15  -5   1    5.70    5.10
   0   6  -1    0.10    0.80
   0  -6   1   -1.50    0.80
   0  -6   1    0.90    0.80
   0  -6  -1    1.00    0.90
   0   6   1    0.30    0.90
   0   6  -1   -0.90    0.70
   0  -6  -1    1.10    0.90
   0   6   1   -0.20    0.90
  -1   6   1  145.69    4.40
   1  -6   1  152.48    4.20
  -1   6   1  154.98    4.60
  -1  -6  -1  151.98    4.60
   1  -6   1  151.68    4.60
  -1  -6  -1  155.38    4.50
   1   6  -1  153.78    4.60
  -1  -6   1  154.68    4.60
   1  -6  -1  145.89    4.40
  -1  -6   1  153.98    4.60
   1   6   1  147.59    4.60
  -1   6  -1  147.79    4.50
  -1   6  -1  148.79    4.20
   1  -6  -1  148.99    4.30
   1  -6  -1  151.78    4.60
  -2   6   1 1005.90   23.30
   2  -6   1  952.60   23.40
   2  -6   1  981.80   22.90
  -2  -6  -1  980.80   23.40
   2   6  -1  971.80   23.50
  -2  -6  -1  975.40   23.50
   2  -6   1  979.10   23.00
   2  -6  -1  996.60   23.20
   2  -6  -1  969.50   23.50
  -2   6  -1  970.60   23.00
  -2  -6   1  969.60   23.50
  -2  -6   1  983.50   23.50
   2   6   1  968.90   23.50
   2  -6  -1  930.21   23.20
  -3  -6  -1  238.58    6.70
   3  -6   1  232.88    6.10
   3  -6   1  234.48    5.90
  -3   6   1  236.88    6.30
   3  -6   1  236.88    6.60
   3   6  -1  238.18    6.70
   3  -6  -1  232.38    6.40
  -3  -6   1  230.48    6.90
  -3  -6   1  244.38    6.70
   3  -6  -1  235.08    6.20
   3   6   1  224.48    6.60
  -3   6  -1  241.78    6.10
   3  -6  -1  246.98    6.70
  -4  -6  -1  101.19    3.90
  -4   6   1   98.79    3.20
   4  -6   1   96.79    3.00
   4  -6   1  100.19    3.70
   4  -6   1   96.29    2.90
  -4  -6  -1  104.49    3.70
   4   6  -1   96.29    3.80
   4  -6  -1  100.89    3.20
   4  -6  -1   98.49    3.40
  -4  -6   1  101.69    3.80
  -4  -6   1  100.19    4.20
  -5   6   1   29.30    1.90
   5  -6   1   33.80    1.80
  -5  -6  -1   30.80    2.70
   5   6  -1   30.90    2.80
  -5  -6  -1   36.60    2.40
   5  -6   1   28.90    1.50
   5  -6  -1   33.00    1.80
   5  -6  -1   30.70    2.20
  -5   6  -1   31.20    1.60
  -5  -6   1   31.80    3.00
  -5  -6   1   33.00    2.50
  -6  -6  -1    0.50    1.70
  -6   6   1   -0.40    1.10
  -6  -6  -1   -1.70    1.30
   6  -6   1   -0.30    1.10
   6  -6   1    0.70    0.80
   6  -6  -1    0.10    1.40
  -6  -6   1   -0.90    1.90
  -6  -6   1   -1.50    1.30
   6  -6  -1   -1.00    0.90
  -6   6  -1    1.50    0.90
  -7   6   1  185.38    5.80
   7  -6   1  191.58    5.70
   7  -6   1  199.48    5.40
  -7  -6  -1  197.58    6.50
  -7  -6  -1  188.88    6.90
  -7  -6   1  194.68    7.10
   7  -6  -1  193.18    5.70
  -7  -6   1  189.78    6.80
  -7   6  -1  190.68    5.50
  -8  -6  -1    4.10    2.70
  -8  -6  -1    5.40    2.00
   8  -6   1    4.40    2.10
  -8   6   1    2.60    1.60
  -8  -6   1    6.60    2.60
  -8  -6   1    4.30    2.00
  -8   6  -1    2.70    1.50
  -9  -6  -1    6.50    2.30
  -9   6   1    6.30    2.10
  -9  -6  -1    3.20    2.90
  -9  -6   1    6.50    3.00
  -9  -6   1    6.60    2.30
  -9   6  -1    3.90    1.80
 -10  -6  -1   40.60    5.00
 -10  -6  -1   38.00    4.40
 -10   6   1   36.90    3.80
 -10  -6   1   42.40    5.00
 -10  -6   1   36.80    3.80
 -11  -6  -1    0.00    2.90
 -11  -6  -1    0.00    5.00
 -11  -6   1    1.70    3.50
 -11  -6   1   -0.40    2.80
 -12  -6  -1   31.20    4.20
 -12  -6  -1   34.60    4.70
 -12  -6   1   27.80    4.20
 -12  -6   1   48.60    6.30
 -13  -6  -1   16.90    4.20
 -13  -6  -1   21.60    4.80
 -13  -6   1   19.30    4.70
 -14  -6  -1    9.20    4.60
 -14  -6  -1   22.90    5.50
 -14  -6   1   27.20    5.30
 -15  -6  -1   48.10    6.80
 -15  -6   1   33.70    6.70
   0   7   1    0.20    0.90
   0  -7   1    0.50    0.90
   0   7  -1    0.40    1.00
   0  -7  -1    1.10    0.90
   0  -7   1    0.70    1.00
   0  -7  -1    1.40    0.90
  -1  -7  -1  239.18    6.80
   1   7  -1  241.58    6.80
   1  -7   1  239.48    6.30
  -1   7   1  240.38    6.80
  -1  -7  -1  240.38    6.60
   1  -7   1  243.98    6.80
  -1  -7   1  231.88    6.70
   1  -7  -1  253.67    6.80
  -1   7  -1  242.78    6.80
  -1   7  -1  227.88    6.30
   1  -7  -1  241.78    6.50
  -1  -7   1  242.88    6.70
   2  -7   1   66.29    2.90
  -2  -7  -1   69.39    2.90
  -2   7   1   62.69    2.60
  -2  -7  -1   69.89    2.90
   2  -7   1   69.59    2.30
   2  -7   1   62.89    2.50
   2   7  -1   66.29    3.00
   2  -7  -1   70.39    2.90
  -2  -7   1   70.39    3.00
   2  -7  -1   66.79    2.50
   2   7   1   68.99    2.90
  -2  -7   1   70.89    3.00
   2  -7  -1   67.09    2.80
  -2   7  -1   66.79    2.90
  -2   7  -1   63.79    2.40
   3   7  -1  246.28    7.20
  -3  -7  -1  244.48    7.10
  -3   7   1  251.87    6.80
   3  -7   1  254.57    6.60
   3  -7   1  248.78    6.40
  -3  -7  -1  248.88    7.10
   3  -7   1  251.37    7.10
   3  -7  -1  239.28    6.80
   3  -7  -1  250.97    7.10
  -3  -7   1  246.98    7.20
  -3   7  -1  254.17    6.50
   3  -7  -1  258.17    6.70
  -3  -7   1  254.47    7.40
   4  -7   1  102.49    3.80
   4  -7   1  100.89    3.30
  -4  -7  -1  100.49    3.80
  -4  -7  -1  104.49    4.10
   4  -7   1  102.89    3.00
   4   7  -1   93.79    4.10
  -4   7   1   99.09    3.30
   4  -7  -1  104.09    3.30
   4  -7  -1   94.29    3.60
   4  -7  -1  107.59    3.90
  -4  -7   1   99.59    4.20
  -4  -7   1  105.09    4.00
   5  -7   1   47.10    1.90
  -5   7   1   50.99    2.50
   5  -7   1   50.99    3.00
   5  -7   1   46.70    2.20
  -5  -7  -1   50.09    3.20
  -5  -7  -1   48.20    3.80
   5  -7  -1   44.20    2.60
   5  -7  -1   50.49    2.30
  -5  -7   1   53.29    3.00
  -5  -7   1   45.90    3.50
  -6  -7  -1  131.09    5.40
  -6  -7  -1  146.69    5.30
   6  -7   1  139.69    4.00
   6  -7   1  142.19    4.20
  -6   7   1  140.79    4.50
  -6  -7   1  143.49    5.70
   6  -7  -1  143.19    5.00
  -6  -7   1  137.99    5.30
   6  -7  -1  134.79    4.40
  -6   7  -1  135.09    4.00
   7  -7   1   88.19    3.10
  -7   7   1   87.59    3.70
  -7  -7  -1   87.19    4.90
   7  -7   1   86.59    3.60
  -7  -7  -1   86.79    4.50
  -7  -7   1   91.19    4.50
  -7  -7   1   86.99    5.00
  -7   7  -1   82.79    3.10
   7  -7  -1   87.99    3.50
  -8  -7  -1   38.50    3.90
  -8  -7  -1   32.20    4.20
  -8   7   1   30.50    2.90
   8  -7   1   35.40    2.20
  -8   7  -1   34.80    2.50
   8  -7  -1   30.40    2.60
  -8  -7   1   32.30    3.70
  -8  -7   1   40.70    4.50
  -9  -7  -1  156.38    6.30
  -9  -7  -1  144.49    7.00
   9  -7   1  145.29    6.30
  -9   7   1  143.39    5.50
  -9  -7   1  138.69    6.80
  -9  -7   1  151.78    6.40
   9  -7  -1  149.59    5.20
  -9   7  -1  152.08    6.20
 -10  -7  -1  114.39    6.70
 -10  -7  -1  114.39    6.10
 -10  -7   1  110.79    6.60
 -11  -7  -1  102.29    6.50
 -11  -7  -1  102.59    7.10
 -11  -7   1   89.89    6.30
 -11  -7   1   97.99    6.60
 -12  -7  -1   19.50    4.50
 -12  -7  -1   23.30    4.30
 -12  -7   1   22.00    4.30
 -12  -7   1   21.10    4.20
 -13  -7  -1  212.78    9.90
 -13  -7  -1  201.48    9.70
 -13  -7   1  221.58   10.00
 -14  -7  -1   12.10    5.30
 -14  -7   1   22.10    5.60
   0   8  -1   -1.40    1.20
   0   8   1    0.40    1.10
   0  -8   1   -0.40    0.90
   0  -8  -1   -0.70    1.00
   0  -8   1    1.20    0.90
   0  -8  -1    0.40    0.90
  -1  -8  -1   27.70    2.00
   1  -8   1   29.90    2.20
   1  -8   1   31.10    1.80
  -1  -8  -1   27.30    2.10
  -1   8  -1   27.50    2.50
  -1  -8   1   29.60    2.10
   1  -8  -1   29.50    1.80
   1  -8  -1   31.60    2.20
   1   8   1   20.80    2.30
  -1  -8   1   32.70    2.20
   2  -8   1   44.20    2.60
  -2  -8  -1   46.10    2.60
   2   8  -1   44.30    3.00
   2  -8   1   41.30    2.30
   2  -8   1   46.10    2.00
  -2  -8  -1   50.99    2.60
  -2  -8   1   42.10    2.60
  -2   8  -1   47.80    2.80
  -2   8  -1   44.60    2.20
   2  -8  -1   49.80    2.20
  -2  -8   1   45.50    2.70
   2  -8  -1   49.90    2.50
  -3  -8  -1   18.20    2.30
  -3  -8  -1   20.80    2.10
   3  -8   1   18.90    2.20
   3  -8   1   19.90    1.90
   3  -8   1   21.00    1.50
   3   8  -1   20.50    2.20
  -3  -8   1   18.90    1.90
   3  -8  -1   20.70    2.10
  -3  -8   1   20.90    2.20
  -3   8  -1   17.20    1.70
   3  -8  -1   18.00    1.60
   4  -8   1    8.70    1.40
   4  -8   1    9.30    1.10
  -4  -8  -1    9.90    1.80
   4  -8   1   10.00    1.70
  -4  -8  -1    9.50    2.10
  -4  -8   1   10.50    2.00
   4  -8  -1   11.30    1.80
  -4  -8   1   10.80    1.80
   4  -8  -1   10.90    1.30
   5  -8   1    5.70    1.30
   5  -8   1    8.00    1.00
   5  -8   1    8.10    1.80
  -5  -8  -1    4.90    1.90
  -5   8   1    6.40    1.30
  -5  -8  -1    9.90    1.60
   5  -8  -1    8.40    1.30
  -5  -8   1    5.90    2.10
   5  -8  -1    9.60    1.70
  -5  -8   1    5.10    1.70
   6  -8   1   45.20    3.50
  -6   8   1   41.70    2.60
  -6  -8  -1   42.40    3.60
  -6  -8  -1   41.50    3.50
   6  -8   1   43.20    2.50
   6  -8   1   44.90    2.10
   6  -8  -1   43.60    3.40
   6  -8  -1   39.70    2.40
  -6  -8   1   37.40    3.50
  -6  -8   1   40.80    3.80
  -7  -8  -1    0.90    2.30
  -7   8   1    6.60    1.70
  -7  -8  -1    4.90    1.90
   7  -8   1    4.80    1.20
  -7   8  -1    5.70    1.30
  -7  -8   1    2.90    2.60
  -7  -8   1    5.30    2.10
   7  -8  -1    7.50    1.50
  -8  -8  -1   10.00    2.50
   8  -8   1    3.00    1.30
  -8   8   1    4.30    1.70
  -8  -8  -1    0.80    2.70
  -8  -8   1   -2.50    2.70
  -8  -8   1    4.00    2.30
   8  -8  -1    1.20    1.50
  -8   8  -1    2.30    1.50
  -9  -8  -1   23.60    3.20
  -9   8   1   27.00    3.30
  -9  -8  -1   27.80    3.90
  -9  -8   1   29.00    3.90
   9  -8  -1   28.90    2.90
  -9  -8   1   19.10    3.10
 -10  -8  -1   60.09    5.90
 -10  -8  -1   72.49    5.50
 -10  -8   1   64.69    5.40
 -10  -8   1   61.99    5.90
 -11  -8  -1   19.50    4.20
 -11  -8  -1   23.70    3.60
 -11  -8   1   16.50    4.10
 -11  -8   1   25.50    4.00
 -12  -8  -1  179.98    9.70
 -12  -8  -1  158.78    9.10
 -12  -8   1  199.18    9.00
 -13  -8  -1    1.60    4.40
 -13  -8  -1    0.80    3.90
 -13  -8   1   11.20    4.50
 -14  -8  -1   11.40    5.40
 -14  -8   1   17.80    5.50
   0  -9   1   -0.70    1.10
   0  -9   1   -0.10    1.00
   0   9  -1   -0.90    1.50
   0  -9  -1   -0.50    1.10
  -1  -9  -1    6.00    1.30
   1   9  -1    5.10    1.60
   1  -9   1    5.80    1.10
   1  -9   1    5.60    1.50
  -1  -9  -1    3.00    1.20
  -1  -9   1    6.10    1.40
   1  -9  -1    6.00    1.10
  -1  -9   1    5.90    1.50
  -1   9  -1    5.20    1.60
   1  -9  -1    4.60    1.40
   2  -9   1   49.99    3.00
  -2  -9  -1   52.99    3.00
  -2  -9  -1   54.89    2.90
   2  -9   1   52.89    2.40
   2   9  -1   50.89    3.40
  -2   9  -1   50.49    3.20
  -2  -9   1   54.09    3.00
   2  -9  -1   49.10    2.40
  -2  -9   1   51.19    3.00
   2  -9  -1   51.09    3.00
   3  -9   1  163.08    5.50
   3  -9   1  157.58    5.00
   3  -9   1  167.28    4.70
  -3  -9  -1  161.68    5.50
  -3  -9   1  163.38    5.60
   3  -9  -1  156.08    5.40
   3  -9  -1  164.78    4.90
  -3   9  -1  161.58    4.90
  -3  -9   1  160.08    5.70
  -4  -9  -1  165.18    5.70
   4  -9   1  152.68    4.90
  -4  -9  -1  161.88    5.70
   4  -9   1  162.68    4.60
   4  -9   1  165.08    5.70
  -4  -9   1  152.58    5.60
   4  -9  -1  150.68    5.60
   4  -9  -1  161.28    4.90
  -4  -9   1  157.38    5.90
  -5  -9  -1   77.09    4.20
  -5  -9  -1   82.29    4.20
   5  -9   1   81.19    4.10
   5  -9   1   69.39    3.20
   5  -9   1   81.69    2.90
   5  -9  -1   84.09    3.20
  -5  -9   1   87.49    4.60
  -5  -9   1   85.29    6.10
   5  -9  -1   79.29    3.90
  -6  -9  -1    4.20    2.00
  -6  -9  -1    7.80    2.40
   6  -9   1    6.80    1.60
   6  -9   1    8.30    1.20
   6  -9   1   10.10    2.10
   6  -9  -1    6.10    1.50
  -6  -9   1    5.50    2.60
  -6  -9   1    5.10    2.10
   6  -9  -1    8.20    2.10
  -7  -9  -1   85.69    5.30
  -7  -9  -1   94.09    4.90
  -7   9   1   83.09    3.70
   7  -9   1   90.49    3.20
   7  -9   1   90.89    4.90
  -7  -9   1   83.69    5.50
  -7  -9   1   88.39    5.10
   7  -9  -1   83.49    5.40
   7  -9  -1   88.29    3.60
   8  -9   1    5.70    2.70
  -8   9   1    8.50    2.00
  -8  -9  -1    5.70    3.00
  -8  -9  -1    4.70    2.50
  -8  -9   1    5.00    3.00
   8  -9  -1    6.20    1.80
  -8  -9   1    6.30    2.70
  -9  -9  -1    2.80    2.70
  -9  -9   1    4.40    4.40
  -9  -9   1    4.50    2.80
 -10  -9  -1   16.70    3.30
 -10  -9  -1   10.10    3.80
 -10  -9   1   18.40    3.70
 -10  -9   1   12.40    3.20
 -11  -9  -1   -1.60    3.80
 -11  -9  -1    3.90    3.50
 -11  -9   1   -1.10    3.60
 -11  -9   1    1.30    3.50
 -12  -9  -1   14.20    4.20
 -12  -9  -1   23.60    4.90
 -12  -9   1   24.80    4.80
 -13  -9  -1   62.19    8.00
 -13  -9   1   65.59    7.70
 -14  -9  -1    8.60    5.50
 -14  -9   1    3.10    6.50
   0 -10  -1    0.90    1.30
   0 -10  -1    0.60    1.30
   0  10  -1    1.10    1.60
   0 -10   1   -0.50    1.30
   0 -10   1    0.80    1.50
  -1 -10  -1    7.30    1.60
   1 -10   1    4.90    1.40
  -1 -10  -1    5.20    1.60
   1 -10   1    5.70    1.70
   1  10  -1    4.70    1.80
  -1 -10   1    4.90    1.60
  -1 -10   1    6.50    1.70
   1 -10  -1    6.30    1.70
  -1  10  -1    7.00    1.90
   1 -10  -1    6.40    1.40
   2 -10   1   19.20    2.10
   2 -10   1   17.50    2.20
  -2 -10  -1   13.90    2.30
  -2 -10  -1   17.50    2.00
   2 -10  -1   18.10    2.10
  -2 -10   1   16.60    2.10
  -2  10  -1   21.90    2.50
   2 -10  -1   18.60    2.10
  -2 -10   1   17.50    2.20
  -3 -10  -1   79.79    4.00
   3 -10   1   73.79    4.00
   3 -10   1   75.79    3.10
  -3 -10  -1   77.29    4.00
   3 -10  -1   85.39    4.00
  -3 -10   1   76.49    4.10
   3 -10  -1   81.89    3.30
  -3 -10   1   79.79    4.10
   4 -10   1    2.10    1.70
   4 -10   1    2.90    1.20
   4 -10   1   -0.40    1.80
  -4 -10  -1    1.50    1.90
  -4 -10  -1    4.10    1.90
   4 -10  -1    1.20    1.80
  -4 -10   1    3.00    2.10
  -4 -10   1    6.10    2.10
   4 -10  -1    2.00    1.30
   5 -10   1   16.50    2.10
  -5 -10  -1   21.90    2.80
  -5 -10  -1   15.90    2.60
   5 -10   1   16.20    2.50
   5 -10   1   20.90    2.00
  -5 -10   1   20.20    2.70
   5 -10  -1   21.10    3.40
  -5 -10   1   12.90    2.70
   5 -10  -1   18.30    2.20
  -6 -10  -1    2.80    2.10
  -6 -10  -1   -0.80    2.30
   6 -10   1    1.60    2.10
   6 -10   1    1.40    1.20
   6 -10  -1   -0.50    1.90
   6 -10  -1    0.30    1.50
  -6 -10   1   -2.90    1.90
  -6 -10   1   -0.40    2.40
  -7 -10  -1    7.40    2.90
  -7 -10  -1    8.30    2.60
   7 -10   1    4.00    2.50
  -7 -10   1    6.60    2.50
   7 -10  -1    5.90    2.50
  -7 -10   1    8.50    3.10
   7 -10  -1    9.90    1.80
  -8 -10  -1   16.90    3.20
  -8 -10  -1   12.60    3.50
   8 -10  -1    9.80    2.90
  -8 -10   1   14.10    2.90
  -8 -10   1    9.10    3.60
  -9 -10  -1    8.40    3.00
  -9 -10  -1   -0.30    3.30
  -9 -10   1    5.90    3.00
  -9 -10   1    3.80    3.40
 -10 -10  -1   11.10    3.50
 -10 -10  -1    8.20    4.00
 -10 -10   1    8.90    3.70
 -10 -10   1    5.20    3.40
 -11 -10  -1    4.30    4.10
 -11 -10   1   13.90    4.20
 -12 -10  -1    6.90    4.60
 -12 -10  -1    3.20    4.10
 -12 -10   1    7.50    4.40
 -13 -10  -1    3.60    4.90
 -13 -10   1    8.70    5.10
   0 -11   1   -1.30    1.50
   0 -11   1   -0.60    1.60
   0 -11  -1    0.40    1.60
   0 -11  -1    1.20    1.50
  -1 -11  -1  236.78    7.40
   1 -11   1  224.28    7.40
  -1 -11  -1  239.18    7.20
   1 -11   1  232.08    6.90
   1 -11  -1  233.28    6.90
  -1 -11   1  234.28    7.50
  -1 -11   1  235.58    7.30
   1 -11  -1  206.18    8.20
   2 -11   1   15.70    2.00
  -2 -11  -1   17.60    2.30
  -2 -11  -1   13.50    2.30
   2 -11   1   13.60    2.20
  -2 -11   1   13.90    2.20
  -2 -11   1   15.90    2.40
   2 -11  -1   15.60    1.80
  -2  11  -1   11.90    2.70
  -3 -11  -1   20.30    2.70
  -3 -11  -1   19.20    2.50
   3 -11   1   19.40    1.90
   3 -11   1   18.80    2.50
   3 -11  -1   16.20    2.70
  -3 -11   1   16.20    2.60
   3 -11  -1   19.20    1.90
   4 -11   1   56.39    3.00
  -4 -11  -1   64.19    4.30
   4 -11   1   61.09    4.10
  -4 -11  -1   61.19    4.40
   4 -11  -1   58.99    4.00
  -4 -11   1   62.29    4.20
  -4 -11   1   54.49    4.30
  -5 -11  -1   -2.30    2.30
  -5 -11  -1    0.20    1.80
   5 -11   1    1.40    1.40
   5 -11   1    0.80    2.10
  -5 -11   1   -1.70    2.40
   5 -11  -1    0.90    2.00
  -5 -11   1   -1.80    2.10
   5 -11  -1    3.10    1.60
   6 -11   1    4.80    2.00
   6 -11   1    6.60    2.60
  -6 -11  -1    4.70    2.50
  -6 -11  -1    3.90    2.60
  -6 -11   1    2.30    2.70
   6 -11  -1    3.20    1.70
  -6 -11   1    4.70    2.60
   6 -11  -1    3.90    2.30
  -7 -11  -1   25.60    3.50
  -7 -11  -1   28.10    3.30
  -7 -11   1   26.90    3.40
   7 -11  -1   24.60    3.10
  -7 -11   1   32.30    4.00
  -8 -11  -1   12.00    3.40
  -8 -11  -1   16.50    3.20
  -8 -11   1   11.00    3.60
  -8 -11   1   15.70    3.50
  -9 -11  -1   62.89    6.10
  -9 -11  -1   63.29    6.20
  -9 -11   1   65.09    6.40
  -9 -11   1   54.29    6.00
 -10 -11  -1   18.50    4.30
 -10 -11  -1   27.50    4.40
 -10 -11   1   22.00    4.40
 -11 -11  -1   -1.30    4.30
 -11 -11  -1    0.40    3.50
 -11 -11   1    6.00    4.40
 -12 -11  -1    7.00    4.70
 -12 -11   1   12.40    4.60
   0 -12   1    0.70    1.80
   0 -12   1    0.20    2.10
   0 -12  -1   -0.90    1.70
   0 -12  -1    0.20    1.90
  -1 -12  -1   55.19    3.90
  -1 -12  -1   57.89    3.70
   1 -12   1   57.29    3.50
   1 -12   1   56.59    4.10
   1 -12  -1   55.49    3.40
   1 -12  -1   64.89    4.20
  -1 -12   1   53.59    4.10
  -1 -12   1   54.29    3.90
  -2 -12  -1    6.50    2.00
   2 -12   1    7.70    2.50
   2 -12   1    6.60    1.80
  -2 -12  -1    7.00    2.20
   2 -12  -1    4.80    1.70
  -2 -12   1    7.00    2.40
   2 -12  -1    6.10    2.30
  -2 -12   1    8.00    2.30
   3 -12   1    2.60    2.50
  -3 -12  -1   -0.10    2.00
  -3 -12  -1    3.00    2.20
  -3 -12   1    3.20    2.20
   3 -12  -1   -1.30    1.90
  -3 -12   1    0.70    2.30
   3 -12  -1   -0.20    1.50
   4 -12   1    5.90    2.50
  -4 -12  -1    6.10    2.40
   4 -12   1    6.50    1.80
  -4 -12  -1    3.00    2.50
  -4 -12   1    2.10    2.50
   4 -12  -1    4.90    1.70
   4 -12  -1    8.80    2.50
  -4 -12   1    6.80    2.50
  -5 -12  -1   80.09    5.20
   5 -12   1   81.99    5.10
  -5 -12  -1   81.19    4.90
   5 -12   1   80.49    3.60
  -5 -12   1   84.69    5.10
   5 -12  -1   85.09    3.80
   5 -12  -1   91.09    4.90
  -5 -12   1   77.09    5.40
  -6 -12  -1    9.40    3.20
  -6 -12  -1   11.90    2.80
  -6 -12   1   17.10    3.50
   6 -12  -1   18.00    2.70
  -6 -12   1   16.30    3.00
   6 -12  -1   12.50    2.80
  -7 -12  -1   -1.90    2.90
  -7 -12  -1    3.00    2.70
  -7 -12   1    3.10    3.30
  -7 -12   1    2.60    2.80
   7 -12  -1    3.70    2.90
  -8 -12  -1  120.79    7.10
  -8 -12  -1  127.59    6.80
  -8 -12   1  112.49    7.50
  -8 -12   1  123.19    7.20
  -9 -12  -1    1.20    3.60
  -9 -12  -1   -0.20    3.40
  -9 -12   1   -4.90    3.40
 -10 -12  -1   -2.10    4.10
 -10 -12  -1    3.70    5.30
 -10 -12   1    6.60    4.00
 -11 -12  -1   -1.70    4.60
 -11 -12   1   10.40    4.60
 -12 -12  -1   21.20    5.40
 -12 -12   1   21.70    5.60
   0 -13  -1   -1.10    1.70
   0 -13  -1    0.30    2.20
   0 -13   1    1.60    2.10
   0 -13   1    0.40    2.10
  -1 -13  -1   80.59    4.80
  -1 -13  -1   83.69    4.60
   1 -13   1   74.09    5.50
   1 -13   1   89.09    4.40
   1 -13  -1   88.79    4.30
   1 -13  -1   73.99    4.70
  -1 -13   1   84.39    5.00
  -1 -13   1   76.39    4.50
  -2 -13  -1    1.20    2.20
   2 -13   1    0.30    2.00
  -2 -13  -1   -0.90    2.20
  -2 -13   1    1.40    2.50
   2 -13  -1    3.40    2.40
  -2 -13   1    1.60    2.40
   2 -13  -1    2.20    1.80
  -3 -13  -1   -1.40    2.20
  -3 -13  -1    0.40    2.40
   3 -13   1   -0.20    1.90
   3 -13  -1   -0.10    1.80
  -3 -13   1    0.50    2.70
   3 -13  -1   -2.10    2.20
  -3 -13   1    1.80    2.30
  -4 -13  -1    0.00    2.60
   4 -13   1    2.10    2.00
  -4 -13  -1   -2.00    2.40
   4 -13   1    1.10    3.10
  -4 -13   1    2.40    2.60
   4 -13  -1    2.10    1.80
  -4 -13   1    2.40    2.80
   4 -13  -1    2.80    2.50
  -5 -13  -1    0.60    2.80
  -5 -13  -1    6.00    2.60
  -5 -13   1    3.60    2.60
   5 -13  -1    2.40    2.70
  -5 -13   1   -0.30    3.10
   5 -13  -1    1.20    1.90
  -6 -13  -1   20.40    3.40
  -6 -13  -1   19.30    3.60
   6 -13  -1   24.70    3.40
  -6 -13   1   25.30    3.70
  -6 -13   1   18.60    3.80
  -7 -13  -1  168.28    7.60
  -7 -13  -1  159.68    7.90
  -7 -13   1  158.28    8.10
  -7 -13   1  163.98    7.80
  -8 -13  -1    0.10    3.30
  -8 -13  -1   -3.00    3.40
  -8 -13   1    0.70    3.50
  -9 -13  -1   32.40    4.80
  -9 -13  -1   27.20    4.70
  -9 -13   1   22.30    4.60
 -10 -13  -1   67.19    7.40
 -10 -13   1   80.69    7.60
 -11 -13  -1   -0.20    4.70
 -11 -13   1    3.60    4.60
   0 -14   1   -1.10    2.40
   0 -14  -1    0.90    2.40
   0 -14  -1   -2.40    2.20
   0 -14   1   -3.10    2.30
  -1 -14  -1  138.49    6.40
   1 -14   1  134.39    5.80
  -1 -14  -1  132.49    6.00
   1 -14   1  137.89    6.50
   1 -14  -1  136.59    6.20
  -1 -14   1  135.89    6.20
   1 -14  -1  134.79    5.60
  -1 -14   1  128.69    6.40
  -2 -14  -1   96.79    5.50
  -2 -14  -1   98.29    5.50
   2 -14   1  105.09    5.90
   2 -14   1   94.19    4.90
   2 -14  -1  106.29    5.80
   2 -14  -1   97.19    4.80
  -2 -14   1   99.79    5.80
  -2 -14   1   86.19    5.40
   3 -14   1    3.10    2.20
  -3 -14  -1    3.50    2.70
   3 -14   1    4.20    4.00
  -3 -14  -1    0.20    2.50
   3 -14  -1   -0.20    2.70
   3 -14  -1    2.70    2.00
  -3 -14   1    2.60    2.70
  -3 -14   1    4.30    2.90
  -4 -14  -1    5.30    3.00
  -4 -14  -1    5.10    3.00
   4 -14  -1    7.20    2.20
   4 -14  -1    3.40    2.80
  -4 -14   1    0.70    3.00
  -4 -14   1   -0.30    3.10
  -5 -14  -1    5.90    2.70
  -5 -14  -1    4.50    3.20
  -5 -14   1   -1.40    3.30
  -5 -14   1    8.00    3.20
  -6 -14  -1    3.00    3.30
  -6 -14  -1   -1.80    3.10
  -6 -14   1   -0.40    3.70
  -6 -14   1   -3.60    3.40
  -7 -14  -1   -1.50    3.60
  -7 -14  -1    2.30    3.10
  -7 -14   1    3.80    3.80
  -8 -14  -1   92.19    7.00
  -8 -14  -1   94.09    7.20
  -8 -14   1   83.89    7.30
  -9 -14  -1   19.90    4.90
  -9 -14   1   15.00    4.70
 -10 -14  -1   12.20    4.70
 -10 -14   1   11.00    5.00
   0 -15   1   -1.90    2.70
   0 -15  -1   -2.00    2.50
   0 -15  -1    0.60    2.80
  -1 -15  -1   95.69    6.00
   1 -15   1   83.59    5.10
  -1 -15  -1   87.49    5.20
  -1 -15   1   78.99    5.70
  -1 -15   1   90.49    6.30
   1 -15  -1   90.69    5.30
   1 -15  -1   89.19    5.90
   2 -15   1   28.80    3.30
  -2 -15  -1   26.10    3.60
  -2 -15  -1   26.00    3.60
  -2 -15   1   26.80    3.90
  -2 -15   1   21.30    4.00
   2 -15  -1   24.60    3.00
   2 -15  -1   23.40    3.50
   3 -15   1   -1.80    3.30
  -3 -15  -1    4.90    2.90
   3 -15  -1   -0.40    2.50
  -3 -15   1   -0.30    3.00
   3 -15  -1    0.00    3.20
  -4 -15  -1   12.40    3.50
  -4 -15  -1   17.40    3.60
  -4 -15   1    9.90    3.90
  -5 -15  -1   19.00    3.60
  -5 -15  -1    8.30    3.60
  -5 -15   1    3.00    3.70
  -6 -15  -1   12.90    4.00
  -6 -15  -1   10.10    3.70
  -6 -15   1    9.10    4.00
  -7 -15  -1    3.50    4.20
  -7 -15   1    8.50    4.40
  -8 -15  -1   -5.80    3.90
  -8 -15   1   -8.40    4.10
  -9 -15  -1    8.70    4.90
  -9 -15   1    4.30    4.80
   0 -16  -1   -0.20    3.20
   0 -16  -1   -0.40    3.00
   0 -16   1   -2.50    3.10
  -1 -16  -1    3.50    3.20
   1 -16   1    6.50    3.30
  -1 -16  -1   -0.20    3.30
   1 -16  -1    1.20    2.90
  -1 -16   1    2.70    3.60
  -2 -16  -1    3.60    3.20
   2 -16   1    0.30    3.00
  -2 -16  -1   -0.40    3.20
  -2 -16   1    0.90    3.80
   2 -16  -1    1.80    2.80
  -3 -16  -1   68.39    6.30
  -3 -16  -1   61.29    5.80
   3 -16  -1   65.99    6.60
  -3 -16   1   58.19    6.40
  -4 -16  -1   19.90    5.20
  -4 -16  -1    7.50    3.80
  -4 -16   1    7.70    4.20
  -5 -16  -1    7.70    4.00
  -5 -16   1   19.20    4.40
  -6 -16  -1   -7.60    3.80
  -6 -16   1    4.20    4.20
  -7 -16  -1   -6.80    4.00
  -7 -16   1    1.60    4.70
  -8 -16  -1   -8.90    4.50
  -8 -16   1    1.60    4.70
   0 -17   1   -1.00    3.70
   1 -17   1    0.70    3.60
  -1 -17  -1    3.30    3.60
   1 -17  -1    1.90    3.40
  -2 -17  -1    3.80    3.80
   2 -17  -1    9.30    3.70
  -2 -17   1    8.50    4.10
  -3 -17  -1   52.59    6.30
  -3 -17   1   61.09    6.80
  -4 -17  -1   -4.30    3.90
  -5 -17  -1   29.80    5.30
  -5 -17   1   30.10    5.30
  -6 -17  -1    4.30    4.80
  -6 -17   1    7.90    4.80
  -7 -17  -1    1.30    5.00
  -7 -17   1   -3.50    4.90
   0 -18   1   -4.60    4.10
   0 -18  -1   -2.90    3.90
  -1 -18  -1   14.80    4.50
  -1 -18   1   16.60    4.70
   1 -18  -1   21.50    4.90
  -2 -18  -1   -5.50    4.30
  -2 -18   1   -2.40    4.60
  -3 -18  -1   -1.10    4.50
  -3 -18   1   -6.60    4.70
  -4 -18  -1   -2.00    4.50
  -4 -18   1   -3.00    4.60
  -5 -18  -1   -7.90    4.80
  -5 -18   1    1.30    5.10
  -6 -18  -1   -9.70    4.90
  -6 -18   1    7.40    5.60
   0 -19  -1   -1.40    5.70
  -1 -19  -1   50.19    6.20
  -1 -19   1   55.39    6.80
  -2 -19  -1   12.90    5.40
  -2 -19   1    9.40    5.60
  -3 -19  -1   -0.20    5.20
  -3 -19   1    3.00    5.60
  -4 -19  -1   13.30    5.60
  -4 -19   1   16.30    6.00
   0   0  -2 2436.76   58.29
   1   0  -2  807.82   17.80
  -1   0  -2  771.22   17.80
  -1   0  -2  721.53   17.70
   1   0  -2  773.12   18.00
   1   0   2  770.42   17.80
   1   0   2  785.82   17.70
  -1   0  -2  759.92   17.80
  -1   0   2  727.63   18.00
   2   0  -2 1403.66   33.50
  -2   0  -2 1437.36   33.30
   2   0  -2 1470.65   33.50
  -2   0   2 1437.86   33.60
   2   0   2 1412.16   33.30
  -2   0  -2 1472.95   33.40
   2   0   2 1409.66   33.30
   3   0   2 9677.73  228.18
  -3   0  -2 9724.63  227.98
   3   0   2 9821.62  227.88
  -3   0   2 9871.91  228.18
  -3   0  -2 9913.11  228.18
  -3   0   2 9970.70  229.58
   3   0  -2 9663.43  227.88
   3   0  -2 9999.00  228.78
  -4   0   2    1.20    0.80
   4   0   2    1.60    0.60
  -4   0  -2    0.90    0.70
  -4   0  -2    2.80    0.90
   4   0  -2    1.20    0.90
  -4   0   2    0.70    0.80
   4   0   2    1.30    0.60
   4   0  -2    1.00    0.70
   5   0  -2  237.18    6.90
  -5   0   2  254.67    6.90
  -5   0   2  246.88    7.00
  -5   0  -2  251.87    6.80
  -5   0  -2  258.77    6.90
   5   0   2  234.58    6.40
   6   0  -2 2348.76   57.39
  -6   0  -2 2447.96   57.39
  -6   0   2 2476.25   57.49
  -6   0   2 2464.55   57.49
  -6   0  -2 2478.35   57.29
  -7   0   2  360.06   11.00
  -7   0  -2  393.56   10.20
  -7   0   2  383.26   10.40
  -7   0  -2  383.96   10.30
  -8   0   2  256.57    7.90
  -8   0  -2  245.48    8.30
  -8   0  -2  262.17    7.90
  -8   0   2  272.07    8.10
  -9   0   2  118.59    5.30
  -9   0  -2  117.69    5.00
  -9   0   2  115.29    5.20
  -9   0  -2  123.79    5.20
 -10   0  -2   67.09    4.60
 -10   0   2   63.49    4.80
 -10   0   2   73.59    4.60
 -10   0  -2   67.69    4.60
 -11   0   2  138.89    6.40
 -11   0  -2  139.89    6.10
 -12   0  -2  164.28    7.30
 -12   0   2  169.18    7.40
 -13   0  -2    0.30    3.30
 -13   0   2    5.70    3.40
 -14   0   2    7.90    4.30
   0   1   2  587.94   13.20
   0   1  -2  581.84   13.30
   0  -1  -2  596.04   13.40
   0   1  -2  564.54   13.10
   0  -1   2  475.35   13.10
   0   1   2  582.94   13.30
  -1  -1  -2 2484.75   56.69
   1   1  -2 2497.75   56.99
  -1   1   2 2381.96   56.59
  -1  -1  -2 2495.55   56.99
   1   1  -2 2386.76   56.49
  -1   1  -2 2465.45   56.69
   1   1   2 2487.15   56.99
   1  -1  -2 2441.36   56.59
  -1  -1   2 2348.27   56.59
  -1   1  -2 2418.76   56.59
   1   1   2 2488.95   56.69
   2   1  -2 2937.51   69.99
   2  -1   2 2843.72   69.69
  -2   1   2 2936.11   69.89
   2   1  -2 3103.89   69.79
  -2  -1  -2 2989.80   69.89
   2  -1   2 3126.69   69.99
  -2  -1  -2 3021.70   70.49
  -2   1  -2 3116.89   69.99
   2   1   2 2971.40   70.19
  -2  -1   2 2979.90   69.99
   2  -1  -2 3101.49   69.79
   2   1   2 3058.59   69.79
   2  -1  -2 3049.69   69.89
   3   1  -2 1020.90   24.00
  -3  -1  -2 1019.90   23.90
   3  -1   2 1004.50   23.90
  -3  -1  -2 1006.80   23.90
  -3   1   2 1021.80   24.10
   3   1  -2  991.60   24.20
   3  -1   2 1005.90   23.60
   3   1   2  991.70   23.80
  -3  -1   2 1016.20   24.20
  -3   1  -2 1026.90   23.70
   3  -1  -2 1034.20   24.00
   3  -1  -2 1045.50   24.00
   3   1   2  995.90   23.90
  -3  -1   2 1025.30   24.00
   4  -1   2  121.09    3.30
  -4  -1  -2  131.69    3.70
   4   1  -2  125.49    3.80
  -4   1   2  120.69    3.70
  -4   1   2  119.79    3.80
   4   1  -2  113.59    4.00
   4  -1   2  120.09    3.60
  -4  -1  -2  127.09    3.70
  -4  -1   2  120.19    3.90
  -4   1  -2  122.29    3.50
   4   1   2  116.59    3.50
   4   1   2  118.49    3.60
   4  -1  -2  123.99    3.80
  -4  -1   2  123.09    3.80
   4  -1  -2  119.89    3.80
   5  -1   2  379.96    9.30
   5   1  -2  371.66    9.80
  -5  -1  -2  379.86    9.70
  -5  -1  -2  387.76    9.80
  -5   1   2  381.66    9.80
  -5   1   2  379.66    9.80
  -5   1  -2  378.56    9.50
   5  -1  -2  360.06    9.80
  -5  -1   2  379.86   10.00
  -5  -1   2  380.86    9.80
   5   1   2  343.67    9.40
   6  -1   2  611.24   15.90
  -6   1   2  662.23   16.50
   6   1  -2  634.24   16.50
  -6  -1  -2  678.53   16.40
  -6  -1  -2  661.03   16.40
  -6   1   2  682.13   16.50
   6  -1  -2  636.24   16.50
  -6   1  -2  675.23   16.10
  -6  -1   2  677.63   16.50
  -6  -1   2  651.43   16.60
  -7  -1  -2    5.40    1.40
  -7   1   2    6.00    1.40
  -7  -1  -2    6.30    1.50
  -7   1   2    6.20    1.70
   7   1  -2    3.50    1.70
   7  -1  -2    4.30    1.70
  -7  -1   2    4.80    1.40
  -7  -1   2    5.80    1.70
  -7   1  -2    4.70    1.30
  -8  -1  -2   82.29    4.00
  -8   1   2   92.79    4.10
  -8  -1  -2   89.29    4.30
  -8   1  -2   86.19    3.90
  -8  -1   2   84.49    4.30
  -8  -1   2   89.29    4.40
  -9   1   2   96.79    4.50
  -9  -1  -2   99.09    4.90
  -9  -1  -2   91.19    4.60
  -9  -1   2   89.89    4.70
  -9   1  -2  102.89    4.40
  -9  -1   2   88.19    4.90
 -10  -1  -2  161.18    6.60
 -10  -1  -2  155.98    6.30
 -10   1   2  161.88    6.30
 -10  -1   2  156.48    6.40
 -10  -1   2  152.78    6.50
 -10   1  -2  152.08    6.00
 -11  -1  -2   27.40    3.30
 -11   1   2   23.30    3.10
 -11  -1  -2   25.20    3.40
 -11  -1   2   14.60    3.10
 -11   1  -2   19.10    3.00
 -11  -1   2   27.40    3.70
 -12   1   2   -0.30    2.80
 -12  -1  -2    9.60    3.10
 -12  -1  -2   -3.00    2.80
 -12  -1   2    2.30    2.90
 -12  -1   2   -5.20    2.90
 -12   1  -2   -1.10    2.70
 -13  -1  -2   52.59    6.50
 -13   1   2   46.90    5.90
 -13  -1   2   48.30    5.70
 -14   1   2   66.29    8.30
 -14  -1   2   87.39    7.30
 -15  -1   2   84.29    8.10
   0   2   2 4283.27   98.29
   0  -2  -2 4315.07   98.79
   0   2  -2 4199.18   98.39
   0  -2  -2 4172.38   98.89
   0   2   2 4266.97   98.99
   0   2  -2 4183.68   98.49
   0   2   2 4252.77   98.59
   0  -2   2 4120.49   98.39
   0  -2  -2 4259.37   98.39
  -1  -2  -2 1250.87   29.30
   1   2  -2 1245.18   29.40
  -1   2   2 1236.18   29.30
   1   2  -2 1196.28   29.30
  -1  -2  -2 1251.47   29.20
  -1  -2   2 1253.47   29.40
   1  -2  -2 1278.67   29.40
   1   2   2 1245.28   29.20
   1  -2  -2 1267.97   29.30
   1   2   2 1256.37   29.30
  -1   2  -2 1303.67   29.00
   2   2  -2   85.19    2.70
  -2   2   2   83.99    2.50
   2   2  -2   85.99    2.50
  -2  -2  -2   83.09    2.40
  -2  -2  -2   83.89    2.40
   2  -2  -2   84.59    2.50
   2   2   2   81.69    2.40
   2   2   2   79.79    2.40
  -2  -2   2   81.69    2.70
  -2  -2   2   82.09    2.50
  -3   2   2   38.50    1.60
  -3  -2  -2   41.10    1.60
   3  -2   2   41.90    1.20
  -3  -2  -2   39.60    1.60
   3   2  -2   43.60    1.80
   3   2  -2   39.20    1.90
  -3  -2   2   40.30    1.70
  -3  -2   2   39.60    2.00
   3   2   2   39.90    1.60
   3  -2  -2   39.90    1.60
  -3   2  -2   43.50    1.20
   3   2   2   37.80    1.60
  -4  -2  -2  645.94   15.40
   4  -2   2  591.94   15.30
   4   2  -2  631.64   15.60
  -4   2   2  643.24   15.50
  -4  -2  -2  659.43   15.50
   4  -2   2  657.73   15.00
   4   2   2  591.84   15.30
   4  -2  -2  641.14   15.50
  -4  -2   2  639.74   15.80
   4  -2  -2  641.84   15.50
   4   2   2  599.24   15.40
  -4   2  -2  660.53   15.00
  -4  -2   2  638.94   15.50
   5  -2   2  135.89    3.80
  -5   2   2  136.19    4.30
   5   2  -2  133.59    4.40
  -5  -2  -2  139.69    4.50
  -5  -2  -2  136.19    4.30
  -5   2  -2  131.99    3.90
   5  -2  -2  131.29    4.30
  -5  -2   2  132.89    4.40
   5  -2  -2  137.39    4.40
  -5  -2   2  124.79    4.70
  -6  -2  -2  260.87    7.40
   6  -2   2  256.57    6.80
  -6  -2  -2  264.67    7.50
   6   2  -2  252.37    7.50
  -6   2   2  257.07    7.30
  -6  -2   2  265.97    7.50
   6  -2  -2  253.37    7.40
  -6   2  -2  260.37    6.90
   7  -2   2  303.57    8.50
  -7  -2  -2  320.27    9.40
  -7   2   2  340.77    9.10
   7   2  -2  307.97    9.40
  -7  -2  -2  323.07    9.10
  -7  -2   2  327.97    9.40
   7  -2  -2  364.26   10.50
  -7  -2   2  333.67    9.30
  -7   2  -2  342.07    8.80
  -8  -2  -2  647.84   16.90
  -8  -2  -2  640.14   16.70
  -8   2   2  652.03   16.70
  -8  -2   2  646.74   17.00
  -8  -2   2  656.43   16.80
  -8   2  -2  653.73   16.30
  -9  -2  -2  130.39    5.30
  -9   2   2  127.89    5.30
  -9  -2  -2  124.99    5.60
  -9  -2   2  127.09    5.50
  -9  -2   2  124.19    5.50
  -9   2  -2  131.29    5.00
 -10  -2  -2   55.49    4.40
 -10   2   2   53.19    4.20
 -10  -2  -2   64.39    4.90
 -10  -2   2   59.49    4.50
 -10  -2   2   68.59    5.00
 -10   2  -2   53.29    3.80
 -11   2   2   38.10    4.20
 -11  -2  -2   32.30    3.50
 -11  -2  -2   36.40    4.80
 -11  -2   2   36.70    3.80
 -11  -2   2   34.70    3.90
 -11   2  -2   33.20    3.90
 -12  -2  -2   28.00    3.90
 -12  -2  -2   29.40    3.80
 -12   2   2   27.40    3.60
 -12  -2   2   32.50    4.10
 -12   2  -2   28.00    3.40
 -12  -2   2   25.00    3.80
 -13  -2  -2    7.30    3.60
 -13  -2  -2   -1.90    3.40
 -13   2   2    3.80    3.30
 -13  -2   2    2.30    3.40
 -13  -2   2    0.50    3.80
 -14  -2  -2  100.19    8.50
 -14  -2   2  102.89    7.60
 -15  -2   2   22.90    5.20
   0   3  -2  852.51   20.60
   0  -3  -2  867.91   20.60
   0   3  -2  882.21   20.50
   0  -3   2  862.41   20.60
   0  -3  -2  878.81   20.70
   0   3   2  889.91   20.60
   0  -3  -2  884.61   20.70
   0   3   2  886.91   20.70
  -1   3   2  737.73   17.30
   1  -3   2  740.33   16.90
  -1   3   2  743.83   17.30
  -1  -3  -2  738.53   17.20
   1   3  -2  719.93   17.20
   1   3  -2  713.03   17.20
  -1  -3  -2  712.93   17.20
  -1   3  -2  712.73   16.80
   1  -3  -2  724.23   17.20
   1   3   2  736.33   17.20
   1  -3  -2  751.82   17.30
   1  -3  -2  725.13   17.20
  -1   3  -2  672.93   17.30
  -1  -3   2  729.53   17.30
   1   3   2  705.73   17.20
   2   3  -2  157.08    4.40
  -2  -3  -2  155.88    4.20
  -2  -3  -2  158.58    4.20
  -2   3   2  153.08    4.20
   2   3  -2  159.68    4.30
   2  -3  -2  158.98    4.20
  -2  -3   2  154.48    4.50
   2   3   2  148.29    4.20
  -2  -3   2  151.98    4.20
   2  -3  -2  159.08    4.30
   2   3   2  157.08    4.20
   3   3  -2    0.00    0.70
  -3  -3  -2    0.60    0.70
   3   3  -2    0.70    0.90
  -3  -3  -2    0.40    0.50
  -3   3   2    0.10    0.70
  -3  -3   2    0.10    1.10
   3  -3  -2   -0.40    0.60
   3   3   2    0.70    0.60
   3   3   2   -0.10    0.60
  -3  -3   2   -0.10    0.70
  -4   3   2  681.83   16.70
  -4  -3  -2  694.23   16.80
   4  -3   2  735.63   16.20
   4   3  -2  679.83   16.90
  -4  -3  -2  697.23   16.80
  -4  -3   2  673.53   17.20
  -4  -3   2  675.73   16.80
   4  -3  -2  671.93   16.70
  -4   3  -2  695.03   16.20
   4   3   2  676.23   16.80
   5   3  -2   85.69    3.40
  -5  -3  -2   90.69    3.40
  -5   3   2   88.39    3.30
  -5  -3  -2   93.49    3.40
   5  -3   2   94.59    2.70
  -5   3  -2   83.39    2.70
  -5  -3   2   85.59    3.40
  -5  -3   2   83.09    4.00
   5  -3  -2   82.29    3.40
   5  -3  -2   86.79    3.20
   6   3  -2  240.18    7.30
  -6   3   2  245.48    6.90
   6  -3   2  253.37    6.40
  -6  -3   2  247.78    7.10
  -6   3  -2  243.08    6.40
  -6  -3   2  242.58    7.50
   6  -3  -2  246.38    7.20
  -7   3   2   36.40    2.40
  -7  -3  -2   30.80    3.10
   7  -3   2   31.10    2.30
  -7  -3  -2   32.50    2.60
  -7  -3   2   32.40    3.00
  -7   3  -2   32.60    2.20
  -7  -3   2   32.80    3.00
  -8  -3  -2   97.09    4.90
  -8   3   2   95.99    4.80
  -8  -3  -2   97.89    4.40
  -8  -3   2  100.39    4.70
  -8  -3   2   97.49    4.50
  -8   3  -2   94.19    3.80
  -9  -3  -2  111.79    5.50
  -9   3   2  113.39    4.80
  -9  -3  -2  108.29    5.00
  -9  -3   2  109.49    5.30
  -9   3  -2  102.59    4.30
  -9  -3   2  107.69    5.50
 -10   3   2    0.50    2.10
 -10  -3  -2    1.10    2.80
 -10  -3  -2    1.50    2.10
 -10  -3   2    0.20    2.30
 -10  -3   2   -0.30    2.30
 -11   3   2  104.39    5.60
 -11  -3  -2  103.69    6.20
 -11  -3  -2   99.99    5.60
 -11  -3   2   94.39    5.90
 -11  -3   2  104.39    5.90
 -11   3  -2   93.69    4.70
 -12   3   2  169.88    7.50
 -12  -3  -2  181.88    8.10
 -12  -3  -2  167.78    7.70
 -12  -3   2  170.88    8.10
 -12  -3   2  163.78    7.80
 -13  -3  -2   29.60    4.20
 -13   3   2   23.70    4.60
 -13  -3   2   19.20    4.00
 -13  -3   2   12.20    5.10
 -14  -3  -2   63.79    7.40
 -14  -3  -2   43.20    5.20
 -14  -3   2   32.10    5.10
 -15  -3  -2    4.50    4.80
 -15  -3   2   18.50    5.00
   0   4  -2  294.97    7.40
   0  -4  -2  304.47    7.60
   0  -4  -2  304.07    7.70
   0  -4   2  301.17    7.60
   0  -4  -2  305.97    7.70
   0  -4   2  303.87    7.50
   0   4   2  314.57    7.70
   0   4   2  306.47    7.70
   0   4  -2  298.47    7.60
  -1   4   2   75.49    2.40
   1  -4   2   65.29    2.30
  -1   4   2   74.99    2.40
  -1  -4  -2   74.09    2.40
   1   4  -2   72.89    2.30
   1  -4   2   75.79    2.10
  -1   4   2   69.19    2.30
   1   4  -2   74.89    2.40
  -1  -4  -2   77.49    2.40
   1   4   2   70.99    2.40
   1  -4  -2   74.09    2.40
   1  -4  -2   76.69    2.40
   1  -4  -2   74.99    2.50
  -1  -4   2   79.09    2.50
  -1  -4   2   72.99    2.40
  -1   4  -2   79.29    2.40
  -1   4  -2   72.49    2.00
   1   4   2   77.69    2.40
  -2  -4  -2   35.30    1.60
   2   4  -2   37.70    1.70
  -2   4   2   36.30    1.60
   2  -4   2   34.70    1.60
  -2  -4  -2   37.30    1.70
   2  -4   2   35.90    1.10
   2   4  -2   34.40    1.70
   2  -4   2   37.30    1.10
   2  -4  -2   36.40    1.70
  -2  -4   2   36.80    1.70
   2   4   2   37.60    1.60
   2  -4  -2   36.20    1.50
  -2  -4   2   36.40    2.10
  -2   4  -2   36.60    1.10
   2   4   2   33.50    1.60
   2  -4  -2   36.10    1.70
  -3  -4  -2  218.08    6.00
   3   4  -2  217.08    5.90
  -3  -4  -2  213.38    5.90
  -3   4   2  214.88    5.80
  -3  -4   2  212.18    5.90
  -3  -4   2  219.48    6.40
   3   4   2  212.28    5.90
   3  -4  -2  217.38    5.90
   3  -4  -2  211.18    5.70
   4  -4   2  422.16   10.10
  -4  -4  -2  437.46   11.00
   4   4  -2  425.76   11.00
  -4  -4  -2  436.56   11.10
   4  -4   2  442.76   10.20
  -4   4   2  427.26   10.90
   4  -4  -2  415.56   10.80
  -4  -4   2  428.26   11.10
   4   4   2  442.96   11.40
  -4  -4   2  425.66   11.50
  -5   4   2  202.78    5.70
   5  -4   2  210.88    5.20
  -5  -4  -2  197.38    5.90
  -5  -4  -2  203.88    6.00
   5   4  -2  194.38    6.00
  -5   4  -2  196.18    5.10
  -5  -4   2  193.48    5.90
   5  -4  -2  198.08    5.70
  -5  -4   2  194.28    6.50
   6   4  -2  369.86   10.50
   6  -4   2  392.06    9.50
  -6   4   2  393.66   10.20
  -6  -4  -2  382.56   10.50
  -6  -4  -2  400.36   10.40
   6  -4  -2  369.96   10.40
  -6  -4   2  395.06   10.50
  -6  -4   2  397.86   10.90
  -6   4  -2  370.66    9.50
  -7   4   2   33.40    2.60
  -7  -4  -2   39.70    2.90
   7  -4   2   37.00    2.30
  -7  -4  -2   35.60    3.30
  -7   4  -2   34.80    2.10
  -7  -4   2   35.40    3.00
  -7  -4   2   36.80    3.40
  -8  -4  -2  215.88    7.10
   8  -4   2  200.88    6.10
  -8  -4  -2  228.18    7.60
  -8   4   2  213.88    7.50
  -8  -4   2  220.08    7.50
  -8   4  -2  229.48    6.40
  -9   4   2   43.40    3.70
  -9  -4  -2   44.00    3.80
  -9  -4  -2   36.00    4.30
  -9  -4   2   44.80    4.10
  -9   4  -2   42.90    3.20
  -9  -4   2   41.40    4.20
 -10  -4  -2   11.40    2.60
 -10   4   2   10.40    2.70
 -10  -4  -2   11.30    3.20
 -10  -4   2    7.40    2.60
 -10   4  -2   12.60    2.30
 -10  -4   2   10.90    3.00
 -11  -4  -2   -3.30    3.10
 -11  -4  -2   -0.70    2.50
 -11   4   2    2.10    2.70
 -11  -4   2    0.80    3.00
 -11  -4   2    1.90    2.80
 -12  -4  -2   74.89    6.00
 -12   4   2   82.19    5.80
 -12  -4  -2   92.69    6.70
 -12  -4   2   97.19    6.70
 -12  -4   2   83.89    6.40
 -13  -4  -2   21.60    4.20
 -13  -4  -2   26.10    4.80
 -13  -4   2   25.60    4.70
 -14  -4  -2   21.00    5.40
 -14  -4  -2   25.50    4.60
 -14  -4   2   15.90    4.50
 -15  -4  -2   40.50    5.80
 -15  -4  -2   45.70    6.40
 -15  -4   2   39.70    5.90
   0  -5  -2  636.24   16.30
   0  -5   2  695.13   16.20
   0   5   2  649.83   16.30
   0  -5  -2  673.23   16.30
   0  -5  -2  688.63   16.30
   0   5   2  700.53   16.30
   0   5  -2  648.44   16.00
   0  -5   2  687.23   16.30
   0   5  -2  679.63   16.30
   1  -5   2   78.59    2.30
   1   5  -2   70.89    2.50
   1   5  -2   73.99    2.60
  -1  -5  -2   79.19    2.70
  -1  -5  -2   78.69    2.70
  -1   5   2   78.19    2.70
   1  -5   2   76.79    2.70
  -1   5  -2   71.59    2.20
  -1  -5   2   77.89    2.70
  -1   5  -2   73.49    2.60
   1  -5  -2   77.09    2.70
  -1  -5   2   80.19    2.80
   1   5   2   67.59    2.60
   1  -5  -2   78.09    2.60
   1  -5  -2   77.19    2.70
   1   5   2   74.39    2.70
  -2  -5  -2  200.58    5.60
   2  -5   2  201.28    4.90
  -2  -5  -2  201.78    5.50
  -2   5   2  189.78    5.40
   2  -5   2  196.58    5.00
  -2   5   2  196.28    5.40
   2   5  -2  195.68    5.50
   2  -5   2  190.28    5.40
   2  -5  -2  198.08    5.40
  -2  -5   2  206.48    5.80
   2   5   2  195.48    5.50
  -2  -5   2  195.48    5.50
   2  -5  -2  192.98    5.50
  -2   5  -2  200.98    4.90
   2  -5  -2  199.18    5.50
   3  -5   2  139.59    3.40
  -3  -5  -2  133.89    4.20
   3  -5   2  132.49    3.50
  -3   5   2  137.29    4.10
   3  -5   2  132.79    4.20
  -3  -5  -2  141.69    4.40
   3   5  -2  132.89    4.30
  -3  -5   2  137.19    4.30
   3  -5  -2  134.49    4.00
   3  -5  -2  131.99    4.10
   3   5   2  125.89    4.20
   4   5  -2  130.19    4.50
  -4  -5  -2  143.19    4.50
   4  -5   2  136.39    3.40
  -4   5   2  138.99    4.20
  -4  -5  -2  136.49    4.40
  -4  -5   2  139.09    4.50
   4  -5  -2  131.69    4.20
   4  -5  -2  135.99    4.10
  -4  -5   2  133.59    5.10
  -5  -5  -2   31.10    2.50
  -5   5   2   28.50    1.90
  -5  -5  -2   33.30    2.30
   5  -5   2   30.80    1.30
   5  -5   2   30.10    1.60
   5   5  -2   29.50    2.60
  -5   5  -2   29.10    1.30
   5  -5  -2   28.50    1.80
  -5  -5   2   33.00    3.10
   5  -5  -2   29.00    2.10
  -5  -5   2   29.60    2.40
  -6  -5  -2  149.69    5.10
   6  -5   2  152.68    4.20
  -6   5   2  155.18    4.80
  -6  -5  -2  144.09    5.30
   6   5  -2  141.19    5.40
  -6   5  -2  142.29    4.10
  -6  -5   2  150.68    5.70
  -6  -5   2  153.28    5.20
  -7  -5  -2    2.00    1.90
  -7  -5  -2    4.30    1.80
  -7   5   2    5.20    1.60
   7  -5   2    6.70    1.30
  -7  -5   2    3.20    2.10
  -7   5  -2    4.60    1.10
  -7  -5   2    5.60    1.80
  -8   5   2   83.59    4.00
  -8  -5  -2   85.69    4.30
   8  -5   2   81.89    3.40
  -8  -5  -2   83.49    4.90
  -8  -5   2   78.69    4.80
  -8   5  -2   77.69    3.30
  -8  -5   2   86.09    4.50
  -9   5   2   37.50    3.50
  -9  -5  -2   40.10    4.60
  -9  -5  -2   41.70    3.90
  -9   5  -2   36.70    3.00
  -9  -5   2   43.30    4.10
  -9  -5   2   40.90    4.30
 -10  -5  -2   51.79    4.60
 -10  -5  -2   43.40    5.40
 -10   5   2   48.10    4.10
 -10   5  -2   43.50    3.60
 -10  -5   2   54.39    4.80
 -10  -5   2   59.49    5.00
 -11   5   2  177.38    6.90
 -11  -5  -2  158.28    7.10
 -11  -5  -2  169.38    8.10
 -11  -5   2  175.38    7.70
 -11  -5   2  163.08    7.30
 -12  -5  -2   39.70    4.90
 -12  -5  -2   39.40    4.30
 -12  -5   2   39.30    4.50
 -12  -5   2   43.40    5.60
 -13  -5  -2   34.20    5.00
 -13  -5  -2   28.70    4.30
 -13  -5   2   56.19    7.20
 -14  -5  -2   60.39    5.90
 -14  -5  -2   83.59    8.00
 -14  -5   2   62.99    6.40
 -15  -5  -2  147.59   10.70
 -15  -5  -2  138.39    9.70
 -15  -5   2  125.99    9.90
   0  -6  -2  185.68    5.10
   0  -6   2  182.88    5.30
   0   6  -2  188.78    5.30
   0  -6   2  187.18    5.10
   0   6   2  181.38    5.30
   0   6  -2  167.18    4.90
   0  -6  -2  182.68    5.30
   1  -6   2  290.27    7.70
   1  -6   2  302.47    7.30
   1   6  -2  293.47    7.70
   1   6  -2  277.17    7.70
  -1  -6  -2  295.17    7.70
  -1  -6  -2  298.47    7.70
  -1   6   2  289.27    7.70
  -1   6   2  274.87    7.60
   1  -6  -2  290.97    7.50
   1  -6  -2  277.47    7.70
   1  -6  -2  285.77    7.70
  -1   6  -2  285.57    7.70
  -1   6  -2  280.37    7.20
   1   6   2  295.17    7.80
  -1  -6   2  293.37    7.80
  -1  -6   2  284.47    7.70
   2  -6   2  119.89    3.40
   2   6  -2  123.89    4.10
   2  -6   2  127.19    3.40
  -2   6   2  119.09    3.80
  -2  -6  -2  123.49    4.00
   2  -6   2  116.39    3.90
  -2  -6  -2  125.09    4.00
   2  -6  -2  119.79    3.70
   2  -6  -2  116.89    3.90
  -2  -6   2  123.19    4.30
   2   6   2  113.99    4.00
  -2   6  -2  124.79    3.40
   2  -6  -2  120.59    4.00
  -2  -6   2  122.29    4.00
  -3   6   2   -0.10    0.90
   3  -6   2    1.70    1.00
  -3  -6  -2    0.60    1.00
   3  -6   2    0.50    0.70
   3   6  -2    0.60    1.20
  -3  -6  -2    0.80    1.10
   3  -6   2    1.00    0.50
  -3  -6   2   -0.10    1.00
   3  -6  -2    1.10    1.00
  -3  -6   2    1.00    1.50
  -3   6  -2    0.20    0.60
   3  -6  -2    1.10    1.00
   3  -6  -2   -0.40    0.80
  -4  -6  -2    3.50    1.00
   4  -6   2    1.50    0.50
  -4   6   2    2.10    0.90
  -4  -6  -2    2.00    1.20
   4  -6   2    1.50    1.10
   4   6  -2   -0.30    1.30
   4  -6   2    1.00    0.60
  -4  -6   2   -1.30    1.00
   4  -6  -2    1.30    1.10
  -4  -6   2    3.80    1.80
   4  -6  -2    1.20    0.80
   5  -6   2    1.70    0.60
  -5   6   2    1.40    1.00
  -5  -6  -2    0.20    1.20
   5  -6   2    0.80    0.80
   5   6  -2    0.00    1.50
  -5  -6  -2    1.50    1.50
   5  -6  -2    0.10    0.90
  -5  -6   2    3.40    1.90
  -5  -6   2    0.10    1.20
  -6   6   2   67.39    3.10
  -6  -6  -2   73.19    3.60
   6  -6   2   68.99    2.20
   6  -6   2   70.09    2.60
   6   6  -2   71.49    6.10
  -6  -6  -2   67.09    3.70
  -6  -6   2   70.69    4.20
  -6   6  -2   67.19    2.30
   6  -6  -2   72.49    3.00
  -6  -6   2   69.19    3.60
  -7  -6  -2    5.60    1.80
  -7  -6  -2    4.30    2.10
   7  -6   2    3.50    0.90
   7  -6   2    3.70    1.30
  -7   6   2    0.30    1.50
  -7  -6   2    0.80    2.10
  -7  -6   2    4.40    2.00
  -7   6  -2    4.20    1.00
  -8  -6  -2  577.64   15.30
  -8   6   2  561.84   14.70
  -8  -6  -2  585.74   15.80
  -8   6  -2  557.14   13.90
  -8  -6   2  562.34   15.30
  -8  -6   2  568.54   15.90
  -9   6   2   16.50    2.50
  -9  -6  -2   19.70    3.30
  -9  -6  -2   18.30    2.70
  -9   6  -2   17.80    1.90
  -9  -6   2   15.20    3.20
  -9  -6   2   17.80    2.80
 -10   6   2    8.30    2.50
 -10  -6  -2    8.70    3.40
 -10  -6  -2    6.70    2.70
 -10  -6   2    9.00    3.00
 -10  -6   2    7.20    2.90
 -11   6   2    1.60    2.90
 -11  -6  -2    4.60    3.80
 -11  -6  -2    3.10    2.70
 -11  -6   2    3.70    3.20
 -11  -6   2    2.80    3.20
 -12  -6  -2   12.50    4.20
 -12  -6   2   13.30    4.00
 -12  -6   2   10.60    4.00
 -13  -6  -2    8.10    4.70
 -13  -6  -2    8.30    3.90
 -13  -6   2   13.00    4.30
 -14  -6  -2   82.19    8.90
 -14  -6  -2   62.39    6.10
 -14  -6   2   73.59    8.30
   0  -7  -2 1199.08   28.10
   0   7  -2 1057.09   27.80
   0  -7  -2 1197.68   28.30
   0  -7   2 1210.88   28.00
   0  -7   2 1172.68   28.20
   0   7   2 1159.78   28.20
   0   7  -2 1240.98   28.30
  -1   7   2   79.89    3.20
  -1  -7  -2   85.39    3.20
  -1  -7  -2   85.99    3.10
   1   7  -2   84.89    3.30
   1  -7   2   77.49    3.20
   1  -7   2   86.49    2.80
   1  -7  -2   84.69    3.00
  -1   7  -2   78.69    2.70
  -1  -7   2   86.89    3.40
   1  -7  -2   83.69    3.20
  -1  -7   2   82.59    3.30
  -1   7  -2   84.29    3.30
   2  -7   2    3.30    1.10
   2  -7   2    3.20    0.80
   2  -7   2    3.70    0.90
  -2  -7  -2    5.30    1.20
   2   7  -2    2.00    1.10
   2  -7  -2    2.80    0.90
  -2   7  -2    4.30    0.90
   2  -7  -2    3.10    0.90
  -2  -7   2    4.00    1.20
  -2   7  -2    5.20    1.20
  -2  -7   2    2.60    1.40
   3   7  -2   88.79    3.60
  -3  -7  -2   85.79    3.40
   3  -7   2   86.19    3.50
   3  -7   2   85.29    2.60
   3  -7   2   85.79    2.80
  -3   7   2   84.79    3.10
  -3  -7  -2   89.19    3.50
   3  -7  -2   89.79    3.10
  -3   7  -2   84.99    2.70
  -3  -7   2   88.49    3.50
  -3  -7   2   88.89    3.90
   3  -7  -2   89.79    3.40
  -4   7   2  162.18    4.90
  -4  -7  -2  166.88    5.40
   4  -7   2  161.88    4.40
   4  -7   2  164.78    4.20
   4  -7   2  161.18    5.30
   4   7  -2  164.28    5.60
   4  -7  -2  165.48    5.30
  -4  -7   2  167.08    5.40
   4  -7  -2  168.28    4.90
  -4  -7   2  163.28    5.80
   5  -7   2    6.30    0.70
   5  -7   2    4.40    1.60
  -5   7   2    5.20    1.40
   5   7  -2    3.90    1.90
   5  -7   2    6.00    0.90
  -5  -7  -2    9.50    1.60
  -5  -7  -2    6.60    1.70
  -5  -7   2    7.20    2.20
   5  -7  -2    8.20    1.20
  -5  -7   2    7.40    1.70
   6  -7   2   26.90    1.40
   6  -7   2   25.60    1.80
  -6  -7  -2   25.10    2.80
  -6   7   2   28.80    2.40
  -6  -7  -2   24.90    3.00
   6  -7  -2   27.60    2.10
  -6  -7   2   27.50    3.50
  -6  -7   2   24.80    2.60
   7  -7   2   80.29    3.10
  -7   7   2   83.59    3.70
  -7  -7  -2   85.79    4.40
   7  -7   2   80.79    2.60
  -7  -7  -2   86.69    4.70
  -7   7  -2   78.09    2.70
  -7  -7   2   78.89    5.00
   7  -7  -2   83.69    3.50
  -8  -7  -2   96.99    5.60
  -8  -7  -2  111.69    5.20
  -8   7   2  103.69    4.50
   8  -7   2  106.69    3.30
   8  -7  -2  101.79    4.30
  -8   7  -2   96.69    3.40
  -8  -7   2  107.89    5.80
  -8  -7   2  111.39    5.30
  -9   7   2  371.96   10.50
  -9  -7  -2  381.86   12.00
  -9  -7  -2  371.96   11.20
   9  -7  -2  369.86   10.30
  -9  -7   2  378.66   11.40
  -9  -7   2  362.46   11.90
 -10  -7  -2   43.10    4.70
 -10   7   2   50.89    4.10
 -10  -7  -2   47.40    4.70
  10  -7  -2   48.90    3.60
 -10  -7   2   43.30    4.70
 -10  -7   2   42.70    5.30
 -11  -7  -2   13.30    3.40
 -11  -7  -2    7.90    3.90
 -11  -7   2   19.30    3.90
 -11  -7   2   11.20    3.80
 -12  -7  -2   39.40    4.70
 -12  -7  -2   42.70    5.20
 -12  -7   2   43.30    5.00
 -13  -7  -2    4.50    4.10
 -13  -7  -2    4.80    4.50
 -13  -7   2    4.40    4.50
 -14  -7  -2   21.50    5.80
 -14  -7  -2   18.80    4.90
 -14  -7   2   33.90    5.70
   0  -8   2  109.59    3.70
   0  -8   2  110.09    4.00
   0  -8  -2  111.39    3.90
   0   8  -2  107.29    4.10
   0  -8  -2  111.59    3.80
  -1  -8  -2  126.19    4.30
   1   8  -2  122.69    4.40
   1  -8   2  125.99    4.40
  -1  -8  -2  124.49    4.30
   1  -8   2  128.09    3.90
  -1  -8   2  126.89    4.30
   1  -8  -2  127.89    4.30
   1  -8  -2  128.39    4.10
  -1   8  -2  120.59    4.40
  -1  -8   2  122.99    4.40
  -1   8  -2  114.79    3.80
   2   8  -2  599.94   15.50
   2  -8   2  617.64   15.50
   2  -8   2  586.14   14.90
  -2  -8  -2  607.24   15.40
  -2  -8  -2  615.24   15.50
   2  -8   2  628.24   14.80
   2  -8  -2  607.64   15.40
  -2   8  -2  619.74   15.50
  -2   8  -2  602.64   14.80
  -2  -8   2  601.74   15.60
   2  -8  -2  617.24   15.10
  -2  -8   2  611.34   15.50
   3  -8   2   23.30    1.80
  -3  -8  -2   23.60    2.30
   3   8  -2   24.70    2.60
   3  -8   2   24.70    1.60
   3  -8   2   21.70    2.30
   3  -8  -2   27.10    2.20
  -3  -8   2   26.20    2.40
  -3   8  -2   24.00    1.70
  -3  -8   2   23.70    2.90
   3  -8  -2   27.00    1.90
  -4   8   2   94.89    3.50
   4  -8   2   96.09    2.90
   4  -8   2   92.59    3.20
  -4  -8  -2   95.09    4.00
   4  -8   2   91.99    4.00
  -4  -8  -2   95.89    4.00
   4   8  -2   96.59    4.20
   4  -8  -2  100.09    3.50
  -4  -8   2   96.29    4.50
  -4  -8   2  101.69    4.20
   4  -8  -2  101.09    4.00
   5  -8   2   -0.90    1.50
  -5  -8  -2    0.30    1.30
   5  -8   2    1.20    0.70
  -5  -8  -2    1.50    1.60
  -5   8   2   -1.10    1.20
   5  -8   2    0.50    0.90
   5  -8  -2    1.00    1.20
  -5  -8   2    0.90    1.50
   5  -8  -2    1.10    1.50
  -5  -8   2    0.50    2.00
   6  -8   2  106.89    3.40
  -6  -8  -2  109.19    4.90
  -6  -8  -2  113.69    4.80
   6  -8   2  108.29    3.10
   6  -8   2  115.79    4.90
  -6   8   2  118.29    4.30
   6  -8  -2  112.59    4.00
  -6  -8   2  109.99    5.50
  -6  -8   2  110.29    5.10
  -7  -8  -2   15.70    2.30
  -7  -8  -2   17.10    2.90
   7  -8   2   15.80    1.40
  -7   8   2   16.00    2.00
  -7  -8   2   11.40    2.90
   7  -8  -2   18.20    2.00
  -7  -8   2   18.60    2.50
  -8  -8  -2   12.50    2.90
  -8   8   2   12.40    2.20
  -8  -8  -2   21.90    3.00
   8  -8  -2   12.70    2.60
  -8  -8   2   12.20    2.50
  -8  -8   2   14.30    3.10
  -9  -8  -2   14.30    3.40
  -9  -8  -2   13.50    2.80
  -9   8   2   20.50    2.60
   9  -8  -2   24.80    3.00
  -9  -8   2   11.90    3.00
  -9  -8   2   19.30    3.70
 -10  -8  -2  357.26   11.30
 -10  -8  -2  347.87   11.90
 -10  -8   2  342.27   11.90
 -10  -8   2  359.16   11.50
 -11  -8  -2    5.20    3.20
 -11  -8  -2   -0.10    4.00
 -11  -8   2    1.40    3.40
 -11  -8   2    4.80    3.50
 -12  -8  -2    3.50    3.70
 -12  -8  -2    9.20    4.50
 -12  -8   2   10.10    4.30
 -13  -8  -2    6.80    5.00
 -13  -8  -2    8.60    4.20
 -13  -8   2   14.70    4.70
 -14  -8  -2   31.80    6.00
 -14  -8  -2   25.50    5.40
 -14  -8   2   37.40    5.80
   0   9  -2   32.00    2.80
   0  -9  -2   35.00    2.40
   0  -9  -2   34.20    2.40
   0  -9   2   34.30    2.20
   0  -9   2   35.90    2.70
   1   9  -2    4.90    1.70
   1  -9   2    3.20    1.40
   1  -9   2    3.50    1.20
  -1  -9  -2    2.20    1.30
  -1  -9  -2    3.30    1.10
  -1  -9   2    1.30    1.30
  -1  -9   2    3.30    1.70
   1  -9  -2    1.30    1.20
  -1   9  -2    3.10    1.60
  -2  -9  -2  204.68    6.20
  -2  -9  -2  182.88    6.90
   2   9  -2  198.88    6.50
   2  -9   2  210.78    5.70
   2  -9   2  208.78    6.50
   2  -9   2  186.08    5.80
   2  -9  -2  209.08    6.40
  -2  -9   2  201.58    6.40
   2  -9  -2  211.18    5.90
  -2   9  -2  204.88    6.50
  -2  -9   2  201.88    6.40
  -2   9  -2  204.68    6.10
  -3  -9  -2   20.00    2.10
   3  -9   2   20.60    2.10
   3   9  -2   18.60    2.20
  -3  -9  -2   21.20    2.40
   3  -9   2   20.90    1.80
   3  -9   2   23.70    2.30
   3  -9  -2   17.30    1.90
  -3  -9   2   17.70    2.40
  -3  -9   2   18.30    2.10
   3  -9  -2   21.90    2.00
  -3   9  -2   18.40    1.90
  -4  -9  -2   34.90    3.00
  -4  -9  -2   33.80    2.90
   4  -9   2   33.40    1.90
   4  -9   2   32.10    2.30
   4   9  -2   36.10    4.20
   4  -9   2   34.30    3.00
  -4  -9   2   31.00    3.00
   4  -9  -2   36.30    3.00
   4  -9  -2   37.00    2.40
  -4  -9   2   33.60    3.50
   5  -9   2   86.29    2.80
   5  -9   2   83.29    4.20
  -5  -9  -2   84.59    4.30
   5  -9   2   83.19    3.10
  -5  -9  -2   81.29    4.20
   5  -9  -2   85.99    3.50
  -5  -9   2   83.09    4.80
  -5  -9   2   81.19    4.30
   6  -9   2   19.90    1.50
  -6  -9  -2   21.00    2.60
  -6   9   2   20.30    2.60
  -6  -9  -2   16.60    2.60
   6  -9   2   18.40    2.50
   6  -9  -2   18.60    2.40
   6  -9  -2   18.40    2.40
  -6  -9   2   20.50    3.10
  -7  -9  -2    9.80    2.30
  -7   9   2   11.50    2.10
  -7  -9  -2    6.40    2.50
   7  -9   2   10.10    2.40
  -7  -9   2    8.80    2.40
   7  -9  -2    8.30    1.80
  -7  -9   2    7.80    2.90
   7  -9  -2    8.00    2.30
  -8  -9  -2  115.69    5.70
  -8  -9  -2  115.39    6.10
  -8  -9   2  119.19    6.10
  -8  -9   2  108.19    6.20
  -9  -9  -2   -1.80    2.50
  -9  -9   2   -3.20    2.70
  -9  -9   2    1.40    3.20
 -10  -9  -2   13.50    3.90
 -10  -9  -2   14.80    3.20
 -10  -9   2   23.90    4.20
 -10  -9   2   19.90    3.50
 -11  -9  -2   53.19    6.60
 -11  -9   2   55.79    6.20
 -12  -9  -2   31.20    5.30
 -12  -9  -2   35.40    4.50
 -12  -9   2   29.20    4.90
 -13  -9  -2  126.79    9.50
 -13  -9  -2  119.59    8.80
 -13  -9   2  154.18    9.40
 -14  -9  -2   16.60    5.90
   0 -10  -2  153.58    5.00
   0  10  -2  145.69    5.60
   0 -10  -2  152.48    5.40
   0 -10   2  146.99    5.50
   0 -10   2  152.68    5.40
  -1 -10  -2    5.70    1.70
   1 -10   2    3.30    1.70
   1  10  -2    2.60    1.80
   1 -10   2    3.80    1.50
  -1 -10  -2    6.10    1.60
  -1  10  -2    4.00    1.80
   1 -10  -2    3.90    1.80
   1 -10  -2    4.80    1.40
  -1 -10   2    2.20    1.50
  -1 -10   2    4.30    1.70
   2 -10   2   89.99    4.20
  -2 -10  -2   91.69    4.00
  -2 -10  -2   87.79    4.10
   2 -10   2   91.99    3.50
   2  10  -2   90.79    6.00
  -2 -10   2   85.39    4.20
  -2  10  -2   80.39    4.20
   2 -10  -2   88.99    3.50
  -2 -10   2   79.99    4.10
   2 -10  -2   83.39    4.70
   3  10  -2   18.10    2.90
  -3 -10  -2   28.80    2.80
  -3 -10  -2   24.90    2.90
   3 -10   2   21.10    2.30
   3 -10   2   29.90    2.30
   3 -10   2   25.20    3.20
  -3 -10   2   20.80    2.30
   3 -10  -2   22.20    2.30
   3 -10  -2   26.00    2.80
  -3 -10   2   26.20    2.80
   4 -10   2  116.59    5.00
   4 -10   2  123.59    3.90
   4 -10   2  108.39    4.10
  -4 -10  -2  118.59    5.00
  -4 -10  -2  127.39    5.10
  -4 -10   2  122.29    5.50
  -4 -10   2  125.79    5.20
  -4  10  -2  113.89    4.00
   4 -10  -2  122.49    4.90
  -5 -10  -2    1.60    1.80
   5 -10   2    4.70    1.20
  -5 -10  -2    5.50    2.10
   5 -10   2    4.00    2.00
   5 -10  -2    4.10    1.70
  -5 -10   2    4.70    2.40
  -5 -10   2    3.50    2.50
   5 -10  -2    4.60    2.00
   6 -10   2  453.45   12.80
  -6 -10  -2  476.75   12.90
  -6 -10  -2  461.75   13.10
   6 -10   2  455.15   11.10
   6 -10  -2  455.25   12.80
  -6 -10   2  457.15   13.50
   6 -10  -2  412.96   12.70
  -6 -10   2  462.65   13.00
  -7 -10  -2   -4.80    2.00
  -7 -10  -2   -2.30    2.30
   7 -10   2    3.40    2.60
   7 -10  -2   -0.30    2.20
  -7 -10   2    0.70    2.30
  -7 -10   2    4.70    3.00
  -8 -10  -2  136.89    6.40
  -8 -10  -2  124.29    7.30
  -8  10   2  124.89    5.30
   8 -10  -2  132.59    4.90
  -8 -10   2  109.29    9.00
  -8 -10   2  134.49    6.60
   8 -10  -2  132.49    6.30
  -9 -10  -2   20.50    3.90
  -9 -10  -2   27.20    3.60
  -9 -10   2   20.30    3.60
  -9 -10   2   19.80    3.80
   9 -10  -2   25.10    3.90
 -10 -10  -2   68.59    6.50
 -10 -10  -2   67.49    6.20
 -10 -10   2   69.29    6.90
 -11 -10  -2   22.20    4.70
 -11 -10  -2   26.10    4.40
 -11 -10   2   23.80    4.50
 -12 -10  -2   24.50    5.30
 -12 -10  -2   28.20    4.80
 -12 -10   2   34.20    5.00
 -13 -10  -2   16.70    5.50
 -13 -10  -2    3.30    5.40
 -13 -10   2    9.60    4.70
   0 -11   2   73.69    3.90
   0 -11  -2   74.19    4.00
   0  11  -2   78.29    4.60
   0 -11   2   73.49    4.20
   0 -11  -2   76.99    3.60
   1 -11   2   -4.00    1.70
  -1 -11  -2    1.50    1.60
   1  11  -2    4.50    2.10
  -1 -11  -2   -0.90    1.60
   1 -11   2   -1.20    1.50
   1 -11  -2    0.10    1.40
   1 -11  -2   -0.30    1.70
  -1  11  -2    0.20    2.10
  -1 -11   2   -1.60    1.80
  -1 -11   2   -1.40    1.60
   2 -11   2   74.89    4.30
  -2 -11  -2   80.49    4.00
   2 -11   2   79.29    3.60
  -2 -11  -2   76.49    4.10
   2 -11  -2   77.59    4.30
  -2 -11   2   74.09    4.30
   2 -11  -2   81.49    3.60
  -2 -11   2   85.79    4.50
   3 -11   2   34.30    2.70
  -3 -11  -2   32.10    3.40
  -3 -11  -2   33.30    3.00
   3 -11   2   30.40    3.10
  -3 -11   2   30.60    3.70
   3 -11  -2   29.80    2.50
   3 -11  -2   34.80    3.50
  -3 -11   2   27.30    2.80
  -4 -11  -2  125.89    5.50
  -4 -11  -2  120.79    5.40
   4 -11   2  124.89    4.20
   4 -11   2  124.79    5.40
   4 -11  -2  127.59    5.30
   4 -11  -2  123.89    4.60
  -4 -11   2  121.19    5.70
  -4 -11   2  123.79    5.90
   5 -11   2   28.30    2.40
   5 -11   2   21.60    2.70
  -5 -11  -2   29.10    3.60
  -5 -11  -2   31.50    3.20
  -5 -11   2   30.20    3.60
   5 -11  -2   23.80    2.70
  -5 -11   2   27.00    3.30
   5 -11  -2   28.10    2.60
   6 -11   2  131.79    6.20
  -6 -11  -2  130.39    6.20
  -6 -11  -2  146.39    6.20
  -6 -11   2  129.89    6.70
   6 -11  -2  137.59    6.00
  -6 -11   2  143.79    6.30
   6 -11  -2  135.99    4.90
  -7 -11  -2   29.30    3.80
  -7 -11  -2   28.10    3.20
   7 -11  -2   24.70    2.90
  -7 -11   2   29.20    3.50
   7 -11  -2   32.90    3.60
  -7 -11   2   34.00    4.00
  -8 -11  -2   12.40    3.10
  -8 -11  -2    6.40    3.40
   8 -11  -2   13.40    3.20
  -8 -11   2   15.80    3.50
  -8 -11   2   10.00    3.60
  -9 -11  -2    4.90    3.40
  -9 -11  -2   -2.30    3.20
  -9 -11   2    7.50    4.40
  -9 -11   2    4.40    3.50
 -10 -11  -2   52.49    5.50
 -10 -11   2   63.19    6.40
 -11 -11  -2   63.79    7.00
 -11 -11  -2   57.29    7.20
 -11 -11   2   72.09    7.00
 -12 -11  -2    6.70    5.00
 -12 -11  -2   18.50    4.60
 -12 -11   2   27.70    5.20
   0 -12  -2  123.39    5.30
   0 -12   2  121.79    5.20
   0 -12  -2  127.89    5.00
   0 -12   2  120.19    5.40
  -1 -12  -2   72.59    4.40
   1 -12   2   84.99    4.20
  -1 -12  -2   90.89    4.50
   1 -12   2   78.89    4.60
   1 -12  -2   88.79    4.60
  -1 -12   2   86.79    4.80
   1 -12  -2   90.89    4.00
  -1 -12   2   85.79    4.60
  -2 -12  -2  165.68    6.40
   2 -12   2  165.48    6.50
   2 -12   2  173.18    5.70
  -2 -12  -2  171.18    6.30
  -2 -12   2  164.98    6.50
   2 -12  -2  169.78    5.70
  -2 -12   2  160.48    6.60
   2 -12  -2  163.98    6.40
   3 -12   2   34.80    3.10
  -3 -12  -2   33.10    3.60
   3 -12   2   36.20    3.40
  -3 -12  -2   37.40    3.60
   3 -12  -2   35.60    2.90
  -3 -12   2   32.40    4.10
   3 -12  -2   36.10    3.90
   4 -12   2  141.99    4.80
   4 -12   2  132.99    6.00
  -4 -12  -2  147.49    6.10
  -4 -12  -2  136.79    6.00
  -4 -12   2  129.59    6.10
   4 -12  -2  135.59    6.00
   4 -12  -2  142.69    5.00
  -4 -12   2  134.29    6.70
  -5 -12  -2   37.10    4.00
  -5 -12  -2   36.90    3.70
   5 -12   2   38.20    4.30
   5 -12  -2   39.80    3.90
   5 -12  -2   32.30    3.10
  -5 -12   2   28.70    3.30
  -5 -12   2   33.50    3.90
  -6 -12  -2  270.27    9.60
  -6 -12  -2  276.47    9.30
   6 -12  -2  272.77    8.00
   6 -12  -2  269.17    9.20
  -6 -12   2  270.37    9.90
  -6 -12   2  278.47    9.60
  -7 -12  -2    4.60    3.00
  -7 -12  -2    9.20    2.90
  -7 -12   2    7.30    3.40
  -7 -12   2    9.00    3.30
   7 -12  -2    9.90    3.10
  -8 -12  -2   23.60    3.60
  -8 -12  -2   22.00    4.00
  -8 -12   2   31.50    5.70
  -8 -12   2   29.80    4.60
  -9 -12  -2   -5.00    3.40
  -9 -12  -2    2.10    3.50
  -9 -12   2    0.20    3.40
 -10 -12  -2   29.10    4.90
 -10 -12  -2   29.80    4.60
 -10 -12   2   19.10    4.30
 -11 -12  -2    6.80    4.30
 -11 -12  -2   -6.50    4.10
 -11 -12   2    6.20    4.60
 -12 -12  -2  211.98   11.00
 -12 -12   2  240.18   12.00
   0 -13  -2  106.99    4.90
   0 -13  -2  103.59    5.30
   0 -13   2  109.29    5.50
   0 -13   2  105.29    5.10
   1 -13   2   51.89    4.00
   1 -13   2   54.39    4.50
  -1 -13  -2   49.90    4.20
  -1 -13  -2   54.49    4.10
  -1 -13   2   55.69    5.30
  -1 -13   2   48.50    4.30
   1 -13  -2   54.19    4.20
   1 -13  -2   61.89    3.70
  -2 -13  -2   37.90    4.10
   2 -13   2   42.10    3.60
   2 -13   2   42.20    4.50
  -2 -13  -2   41.20    4.00
  -2 -13   2   43.50    4.50
  -2 -13   2   40.10    4.10
   2 -13  -2   45.80    4.30
   2 -13  -2   45.40    3.40
  -3 -13  -2   -0.30    2.30
  -3 -13  -2   -0.30    2.20
   3 -13   2    4.50    2.00
   3 -13   2   -2.00    2.40
   3 -13  -2    0.60    2.30
  -3 -13   2    4.60    2.60
   3 -13  -2    3.10    1.90
  -3 -13   2   -0.70    2.70
  -4 -13  -2  327.77   10.40
   4 -13   2  322.27    9.00
  -4 -13  -2  315.17   10.20
  -4 -13   2  320.37   10.40
   4 -13  -2  316.07   10.10
  -4 -13   2  312.87   10.60
   4 -13  -2  319.77    9.20
  -5 -13  -2    8.70    2.50
  -5 -13  -2   -0.60    3.00
   5 -13  -2    6.90    2.10
  -5 -13   2    2.90    3.10
   5 -13  -2    1.30    2.50
  -5 -13   2    3.60    3.00
  -6 -13  -2   18.40    3.30
  -6 -13  -2   15.00    3.40
  -6 -13   2   27.20    3.80
   6 -13  -2   17.10    3.10
  -6 -13   2   17.40    4.00
  -7 -13  -2  134.89    6.90
  -7 -13  -2  136.29    7.20
  -7 -13   2  135.09    7.60
  -8 -13  -2   74.59    6.80
  -8 -13  -2   87.19    6.70
  -8 -13   2   80.19    6.90
  -9 -13  -2    8.90    3.80
  -9 -13  -2    2.90    3.90
  -9 -13   2   12.00    4.20
 -10 -13  -2    6.60    4.20
 -10 -13  -2   -3.30    4.10
 -10 -13   2    8.10    4.30
 -11 -13  -2    3.10    4.80
 -11 -13   2    6.60    4.50
   0 -14  -2  110.19    5.20
   0 -14   2  118.39    5.70
   0 -14  -2  114.79    5.80
   0 -14   2  111.39    5.80
  -1 -14  -2  125.29    6.10
  -1 -14  -2  125.39    5.70
   1 -14   2  117.59    5.70
   1 -14   2  106.69    6.60
  -1 -14   2  115.29    6.00
   1 -14  -2  120.59    5.90
   1 -14  -2  124.99    5.30
  -1 -14   2  114.79    6.20
  -2 -14  -2   17.00    2.90
   2 -14   2   21.70    2.90
  -2 -14  -2   21.10    3.20
  -2 -14   2   17.60    3.40
  -2 -14   2   17.10    3.20
   2 -14  -2   24.10    3.20
   2 -14  -2   22.30    2.70
  -3 -14  -2   19.20    3.20
  -3 -14  -2   14.30    3.00
   3 -14   2   12.10    2.60
  -3 -14   2   14.80    3.50
   3 -14  -2   13.50    3.00
   3 -14  -2   15.20    2.50
  -3 -14   2   16.20    3.30
  -4 -14  -2  175.48    7.50
  -4 -14   2  161.18    7.80
  -4 -14   2  160.68    7.60
   4 -14  -2  159.78    7.30
   4 -14  -2  170.88    6.10
  -5 -14  -2   85.09    5.80
  -5 -14  -2  101.69    6.00
  -5 -14   2   92.29    6.60
   5 -14  -2   87.19    4.80
   5 -14  -2   88.49    6.00
  -6 -14  -2   15.30    3.70
  -6 -14  -2   15.90    3.50
  -6 -14   2   13.80    4.10
  -7 -14  -2   30.90    4.50
  -7 -14  -2   28.70    3.90
  -7 -14   2   30.40    4.80
  -8 -14  -2   38.40    5.20
  -8 -14  -2   40.10    5.30
  -8 -14   2   51.49    6.70
  -9 -14  -2   22.30    4.30
  -9 -14  -2   16.30    4.70
  -9 -14   2   23.80    4.80
 -10 -14  -2  223.08   11.30
 -10 -14   2  241.68   11.10
   0 -15   2  152.68    6.90
   0 -15  -2  155.38    6.50
   0 -15  -2  156.68    7.00
  -1 -15  -2    6.40    3.00
   1 -15   2    1.80    2.90
  -1 -15  -2   -2.40    2.60
   1 -15  -2    0.50    2.70
   1 -15  -2   -1.00    2.50
  -1 -15   2    2.80    3.10
  -2 -15  -2   79.59    5.50
  -2 -15  -2   79.39    5.70
   2 -15   2   65.49    5.00
  -2 -15   2   69.49    6.00
   2 -15  -2   78.19    4.80
   2 -15  -2   79.69    5.70
  -3 -15  -2    1.80    3.00
  -3 -15  -2    4.10    3.00
   3 -15  -2    4.90    3.20
   3 -15  -2    6.80    2.50
  -3 -15   2    3.80    3.40
  -4 -15  -2   52.19    5.30
  -4 -15  -2   63.59    6.00
   4 -15  -2   56.39    4.40
   4 -15  -2   63.29    5.70
  -4 -15   2   58.39    6.00
  -5 -15  -2   30.90    4.40
  -5 -15  -2   47.30    5.50
  -5 -15   2   36.00    4.80
  -6 -15  -2   14.30    3.90
  -6 -15  -2   11.40    3.90
  -6 -15   2   12.40    4.40
  -7 -15  -2    3.00    4.20
  -7 -15  -2    4.30    4.00
  -7 -15   2   -3.10    4.10
  -8 -15  -2   14.80    4.60
  -8 -15  -2   16.50    4.60
  -8 -15   2   25.80    5.20
  -9 -15  -2   -6.50    4.20
  -9 -15   2    8.20    4.70
   0 -16  -2  135.49    7.00
   0 -16  -2  139.19    6.60
   0 -16   2  143.49    7.10
  -1 -16  -2    2.50    3.90
   1 -16   2    1.70    3.20
  -1 -16  -2    4.60    3.20
  -1 -16   2    6.20    3.70
   1 -16  -2    4.20    2.90
   1 -16  -2    2.80    3.20
  -2 -16  -2  181.18    8.30
  -2 -16  -2  181.98    7.60
  -2 -16   2  167.88    8.40
   2 -16  -2  170.38    7.10
   2 -16  -2  175.68    7.90
  -3 -16  -2   20.60    4.10
  -3 -16  -2   12.70    3.70
   3 -16  -2   14.60    3.20
  -3 -16   2   12.40    4.00
  -4 -16  -2   41.50    4.60
  -4 -16  -2   41.10    4.70
  -4 -16   2   43.90    5.20
  -5 -16  -2    3.50    3.20
  -5 -16  -2   -8.80    3.50
  -5 -16   2   -1.40    4.00
  -6 -16  -2   28.80    4.90
  -6 -16  -2   25.30    5.30
  -6 -16   2   22.50    5.00
  -7 -16  -2   32.40    5.50
  -7 -16   2   47.30    5.90
  -8 -16  -2    7.40    4.80
  -8 -16   2    2.60    4.70
   0 -17  -2   42.90    4.50
   0 -17   2   37.90    4.80
  -1 -17  -2   -1.90    3.40
   1 -17  -2   -1.60    3.20
  -1 -17   2   -5.60    4.40
  -2 -17  -2   70.89    6.40
   2 -17  -2   60.39    5.70
  -2 -17   2   57.49    7.10
  -3 -17  -2   51.59    6.50
  -3 -17   2   54.29    5.70
  -4 -17  -2   61.69    6.80
  -4 -17   2   88.59    8.00
  -5 -17  -2   32.90    5.00
  -5 -17   2   43.00    5.90
  -6 -17  -2   13.00    5.00
  -6 -17   2   16.50    5.30
  -7 -17  -2   -2.10    4.90
  -7 -17   2    7.70    5.40
   0 -18  -2   46.20    4.90
  -1 -18  -2    3.00    4.00
   1 -18  -2   -3.90    3.80
  -1 -18   2   -8.40    4.40
  -2 -18  -2   -7.90    3.80
  -2 -18   2   -1.10    4.70
  -3 -18  -2   -4.80    4.00
  -3 -18   2   -2.10    4.70
  -4 -18  -2   15.60    4.90
  -4 -18   2   19.60    5.60
  -5 -18  -2   48.60    6.30
  -5 -18   2   48.20    6.60
  -6 -18  -2   -1.20    4.90
  -6 -18   2    2.80    5.30
   0 -19  -2   12.40    4.90
  -1 -19  -2    7.10    5.10
  -2 -19  -2   57.49    6.20
  -2 -19   2   61.59    6.90
  -3 -19  -2   10.20    5.70
  -3 -19   2   17.10    6.10
  -4 -19  -2    5.20    5.40
  -4 -19   2    2.60    5.70
   0   0  -3    0.10    0.40
   0   0   3    0.50    0.40
  -1   0  -3    0.70    0.50
  -1   0  -3    0.40    0.30
   1   0   3    0.20    0.40
   1   0   3    0.70    0.50
  -1   0   3   -0.30    0.60
  -1   0   3   -0.50    0.40
   1   0  -3   -0.20    0.40
   1   0   3    0.10    0.30
  -1   0  -3   -0.20    0.40
   1   0  -3   -0.60    0.60
  -2   0  -3    0.10    0.30
   2   0   3   -0.50    0.30
  -2   0   3    0.20    0.50
  -2   0  -3   -0.30    0.20
   2   0  -3   -0.70    0.50
   2   0   3   -0.50    0.30
   3   0  -3   -0.10    0.50
   3   0   3    0.70    0.50
  -3   0  -3   -0.20    0.40
   3   0  -3    0.40    0.60
  -3   0  -3   -0.10    0.50
  -3   0   3   -0.60    0.60
   3   0   3   -0.10    0.40
  -3   0   3   -0.20    0.50
  -4   0   3    0.30    0.80
  -4   0   3    0.10    0.90
   4   0   3    0.50    0.60
  -4   0  -3   -0.30    0.70
   4   0  -3    0.30    0.90
   4   0   3   -1.00    0.60
   4   0  -3   -0.80    0.70
  -4   0  -3    1.20    0.80
  -5   0   3   -1.10    1.10
   5   0  -3   -0.50    1.00
  -5   0  -3    2.00    1.10
  -5   0   3   -0.50    1.00
   5   0   3    0.40    0.70
  -5   0  -3    1.60    1.00
  -6   0  -3    0.10    1.10
  -6   0  -3   -0.40    1.10
   6   0   3   -0.60    1.10
  -6   0   3    0.90    1.10
   6   0  -3   -0.80    1.10
  -6   0   3    1.30    1.30
  -7   0   3   -1.40    1.30
  -7   0  -3    1.20    1.30
  -7   0  -3    0.80    1.30
   7   0  -3   -1.40    1.60
  -7   0   3   -1.60    1.40
  -8   0  -3   -1.70    1.70
  -8   0   3    1.80    1.90
  -8   0   3   -2.70    1.50
  -8   0  -3    1.70    1.50
  -9   0   3    0.30    1.90
  -9   0  -3   -1.10    1.80
  -9   0  -3    1.60    2.00
 -10   0   3   -0.90    2.30
 -10   0   3   -5.70    2.20
 -10   0  -3   -0.80    2.20
 -10   0  -3    2.50    2.20
 -11   0  -3    1.50    2.70
 -11   0   3    0.50    2.60
 -12   0  -3    3.10    3.00
 -12   0   3    2.20    2.90
 -13   0   3    0.50    3.60
 -13   0  -3   -1.10    3.50
 -14   0   3   -5.30    4.30
 -15   0   3   14.50    7.10
   0   1   3    0.00    0.50
   0   1  -3   -0.20    0.40
   0  -1  -3   -0.40    0.50
   0   1  -3   -0.10    0.20
   0  -1   3   -0.20    0.40
   0  -1  -3    0.00    0.20
   0  -1  -3   -0.30    0.40
   0   1   3    0.30    0.40
   0  -1   3    0.10    0.20
   1  -1   3   79.39    2.20
   1   1  -3   78.19    2.60
  -1  -1  -3   80.69    2.10
  -1  -1  -3   81.49    2.40
   1   1  -3   81.39    2.30
  -1  -1  -3   83.79    2.40
  -1   1   3   83.39    2.60
  -1   1  -3   78.19    2.20
   1   1   3   81.89    2.40
   1  -1  -3   85.79    2.60
   1   1   3   78.99    2.10
  -1  -1   3   81.69    2.30
  -1   1  -3   78.29    2.20
   1   1   3   81.99    2.40
  -1  -1   3   77.09    2.50
  -2  -1  -3  681.93   16.20
   2   1  -3  707.43   16.60
   2  -1   3  697.73   16.10
   2  -1   3  671.23   16.20
  -2  -1  -3  689.83   16.30
  -2   1   3  677.33   16.60
  -2   1  -3  704.93   16.10
   2  -1  -3  690.33   16.60
   2   1   3  702.93   16.20
   2   1   3  685.93   16.40
  -2  -1   3  682.03   16.60
   2  -1  -3  673.73   16.60
  -2   1  -3  704.53   16.10
  -3  -1  -3  528.45   12.70
  -3  -1  -3  548.85   12.80
   3   1  -3  514.75   13.10
   3   1  -3  519.15   12.90
   3  -1   3  531.45   12.50
  -3   1   3  540.65   13.00
   3  -1   3  500.85   12.70
   3   1   3  524.95   12.70
   3   1   3  522.95   12.70
  -3   1  -3  544.15   12.50
  -3  -1   3  529.75   13.10
   3  -1  -3  534.15   12.90
  -3  -1   3  546.25   12.90
   3  -1  -3  515.45   13.00
  -4   1   3   13.90    1.50
   4  -1   3   14.40    1.30
  -4  -1  -3   19.00    1.50
  -4  -1  -3   16.20    1.50
   4  -1   3   15.90    1.00
  -4   1   3   12.70    1.50
   4   1  -3   18.10    1.70
  -4   1  -3   19.60    1.40
  -4  -1   3   13.90    1.50
  -4  -1   3   15.70    1.70
   4  -1  -3   15.40    1.70
   4   1   3   15.80    1.30
   4  -1  -3   17.60    1.60
   4   1   3   12.00    1.30
  -5   1   3    0.90    1.20
   5  -1   3    2.40    0.70
   5   1  -3    2.30    1.10
  -5   1   3    2.40    1.20
  -5  -1  -3    3.30    1.00
  -5  -1  -3    4.30    1.20
  -5  -1   3    0.50    1.30
  -5  -1   3    3.30    1.30
   5   1   3    1.70    0.80
  -5   1  -3    2.80    1.20
   5  -1  -3    2.60    1.20
  -6  -1  -3    3.20    1.30
   6   1  -3    5.00    1.50
  -6   1   3    5.60    1.40
  -6   1   3    0.80    1.20
   6  -1   3    1.10    0.90
  -6  -1  -3    3.50    1.30
  -6  -1   3    2.10    2.70
  -6  -1   3    4.20    1.40
   6  -1  -3    3.00    1.40
  -6   1  -3    3.30    1.20
   7   1  -3    1.40    1.60
  -7   1   3    7.60    1.60
  -7  -1  -3    3.60    1.50
  -7  -1  -3    5.20    1.40
  -7  -1   3    3.70    1.60
  -7  -1   3    4.80    1.60
  -7   1  -3    6.20    1.60
   7  -1  -3    4.50    1.60
  -8  -1  -3   24.10    2.60
  -8   1   3   30.20    2.90
  -8  -1  -3   22.10    2.20
  -8   1  -3   21.00    2.20
  -8  -1   3   22.40    2.50
  -8  -1   3   21.50    2.40
  -9   1   3    3.90    1.90
  -9  -1  -3    2.40    1.90
  -9  -1  -3    2.90    2.30
  -9  -1   3   -1.60    1.90
 -10  -1  -3    8.30    2.70
 -10  -1  -3    8.30    2.30
 -10   1   3   10.70    2.50
 -10  -1   3    8.20    2.50
 -10  -1   3   11.20    2.70
 -10   1  -3    9.00    2.30
 -11  -1  -3   20.60    3.10
 -11   1   3   15.50    3.00
 -11  -1  -3   21.50    3.30
 -11   1  -3   18.00    3.00
 -11  -1   3   16.00    3.10
 -11  -1   3   24.50    3.30
 -12   1   3   -1.60    2.90
 -12  -1  -3    0.50    3.20
 -12  -1  -3   -2.50    2.80
 -12   1  -3   -3.80    2.70
 -12  -1   3    1.50    3.00
 -12  -1   3   -4.30    3.20
 -13   1   3    5.00    3.40
 -13  -1  -3   11.30    3.70
 -13  -1   3    1.50    3.40
 -14   1   3    0.80    4.20
 -14  -1   3   11.60    4.30
 -15  -1   3   14.00    5.30
   0   2  -3    0.00    0.50
   0   2   3    0.30    0.50
   0   2   3    0.40    0.30
   0   2   3    0.70    0.50
   0  -2  -3    0.00    0.30
   0  -2  -3   -0.40    0.40
   0   2  -3   -0.50    0.30
   0  -2   3   -0.60    0.40
   0  -2  -3    0.20    0.50
   0  -2   3    0.10    0.30
  -1  -2  -3   51.49    1.60
   1  -2   3   49.00    1.50
   1  -2   3   51.39    1.60
  -1  -2  -3   53.89    1.80
  -1   2   3   52.29    1.90
   1   2  -3   52.69    1.70
   1   2  -3   51.39    1.90
  -1  -2  -3   53.69    1.80
  -1   2  -3   54.69    1.50
   1   2   3   50.89    1.60
   1  -2  -3   49.99    1.80
   1  -2  -3   53.99    1.90
   1   2   3   51.39    1.80
  -1  -2   3   50.29    1.80
   2   2  -3 5778.72  132.99
  -2  -2  -3 5564.64  132.99
  -2   2   3 5660.33  132.79
  -2  -2  -3 5736.73  133.19
   2   2  -3 5613.74  132.39
   2   2   3 5739.23  133.09
   2   2   3 5837.72  132.39
   2  -2  -3 5721.53  131.99
  -2  -2   3 5767.82  133.99
   3  -2   3  132.79    3.20
  -3  -2  -3  129.49    3.70
  -3   2   3  130.49    3.90
  -3  -2  -3  132.09    3.70
   3   2  -3  133.19    3.90
   3   2  -3  119.79    4.10
  -3  -2   3  134.79    3.80
  -3   2  -3  139.79    3.30
   3   2   3  127.39    3.70
   3   2   3  132.89    3.70
  -3  -2   3  131.79    4.10
   3  -2  -3  130.19    3.90
  -4  -2  -3  357.96    9.00
   4  -2   3  330.77    9.10
  -4  -2  -3  370.16    9.10
  -4   2   3  362.06    9.30
   4   2  -3  367.86    9.20
   4  -2   3  369.66    8.50
   4  -2  -3  338.17    9.20
  -4   2  -3  372.16    8.60
   4   2   3  330.17    8.90
   4   2   3  329.07    9.00
  -4  -2   3  354.86    9.50
   4  -2  -3  361.56    9.20
  -4  -2   3  367.06    9.20
   5  -2   3   53.79    1.90
   5   2  -3   52.79    2.80
  -5  -2  -3   59.29    2.70
  -5   2   3   54.59    2.60
  -5  -2  -3   54.19    2.50
  -5  -2   3   54.89    2.60
   5  -2  -3   53.29    2.70
  -5   2  -3   54.99    2.20
  -5  -2   3   49.90    3.00
   6   2  -3   37.90    2.90
  -6  -2  -3   38.90    2.60
  -6  -2  -3   38.90    2.40
   6  -2   3   35.50    1.80
  -6   2   3   37.90    2.30
  -6  -2   3   37.10    2.60
  -6  -2   3   33.50    2.80
   6  -2  -3   40.50    2.80
  -6   2  -3   35.50    2.00
   7   2  -3   60.79    3.80
   7  -2   3   57.79    2.60
  -7  -2  -3   65.69    3.60
  -7  -2  -3   67.29    3.30
  -7  -2   3   68.19    3.60
  -7  -2   3   64.29    3.50
  -7   2  -3   64.49    2.90
   7  -2  -3   61.39    3.70
  -8  -2  -3   51.89    3.90
  -8  -2  -3   50.49    3.30
  -8   2   3   48.20    3.20
  -8  -2   3   50.99    3.80
  -8   2  -3   41.30    3.00
  -8  -2   3   53.39    3.80
  -9  -2  -3   31.90    3.30
  -9  -2  -3   30.70    3.30
  -9   2   3   29.30    3.30
  -9   2  -3   34.00    3.20
  -9  -2   3   31.80    3.30
  -9  -2   3   27.10    4.10
 -10  -2  -3   51.29    4.70
 -10   2   3   42.60    3.90
 -10  -2  -3   39.10    4.10
 -10  -2   3   44.80    4.50
 -10   2  -3   45.80    3.60
 -10  -2   3   45.20    4.50
 -11  -2  -3    6.90    3.00
 -11   2   3    5.60    2.60
 -11  -2  -3    3.60    2.50
 -11  -2   3    3.70    2.70
 -11   2  -3    2.10    2.30
 -11  -2   3    3.80    2.90
 -12  -2  -3   14.90    3.70
 -12   2   3   14.70    3.30
 -12  -2  -3   10.10    3.20
 -12  -2   3   11.90    3.50
 -12  -2   3   10.80    3.50
 -13   2   3    4.30    3.80
 -13  -2  -3   11.30    4.10
 -13  -2  -3    5.60    3.30
 -13  -2   3    7.40    3.60
 -14  -2  -3   33.20    5.10
 -14  -2   3   19.80    4.70
 -15  -2   3    5.10    4.80
   0  -3  -3   -0.10    0.40
   0   3   3    0.50    0.40
   0   3  -3   -0.10    0.40
   0   3   3    0.30    0.40
   0  -3   3    0.50    0.40
   0  -3  -3   -0.80    0.50
   0   3   3    0.70    0.50
   0   3  -3    0.50    0.40
   0  -3  -3   -0.40    0.30
  -1   3   3   17.60    1.10
  -1  -3  -3   17.40    1.10
  -1   3   3   16.20    1.10
   1  -3   3   17.70    0.80
   1  -3   3   13.80    1.10
  -1  -3  -3   17.40    1.00
  -1  -3  -3   17.60    1.10
   1   3  -3   17.20    1.10
   1   3   3   19.10    1.10
   1  -3  -3   18.10    1.10
   1  -3  -3   17.10    0.90
  -1  -3   3   18.10    1.20
  -1   3  -3   16.40    0.80
  -1   3  -3   17.90    0.90
   1  -3  -3   17.40    1.20
   1   3   3   16.70    0.90
  -2   3   3   46.00    1.80
   2   3  -3   43.40    2.00
  -2  -3  -3   45.70    1.70
  -2  -3  -3   43.40    1.70
   2   3  -3   46.40    1.80
   2  -3  -3   46.80    1.80
  -2  -3   3   47.30    2.00
   2  -3  -3   46.30    1.80
   2   3   3   45.60    1.70
  -2  -3   3   35.70    1.60
   2   3   3   43.20    1.80
   3   3  -3   32.30    1.70
  -3  -3  -3   30.80    1.60
  -3  -3  -3   30.30    1.60
  -3   3   3   30.00    1.80
   3   3   3   30.40    1.60
   3   3   3   27.50    1.50
   3  -3  -3   29.00    1.80
  -3  -3   3   26.80    1.70
  -3  -3   3   27.30    2.20
  -4   3   3  284.77    7.60
  -4  -3  -3  285.87    7.40
   4   3  -3  284.27    7.60
  -4  -3  -3  282.57    7.40
  -4  -3   3  284.07    7.50
  -4  -3   3  270.57    7.90
   4  -3  -3  263.87    7.50
   5  -3   3   20.20    1.10
  -5  -3  -3   20.40    1.90
  -5   3   3   14.90    1.80
  -5  -3  -3   24.00    2.00
   5   3  -3   24.70    2.30
  -5   3  -3   21.10    1.30
  -5  -3   3   21.20    2.60
  -5  -3   3   19.00    2.00
   5  -3  -3   22.20    2.20
  -6  -3  -3   24.30    2.30
   6   3  -3   23.90    2.80
   6  -3   3   20.60    1.40
  -6   3   3   22.50    2.10
  -6  -3   3   20.80    2.40
  -6  -3   3   21.10    2.60
  -6   3  -3   21.80    1.60
   6  -3  -3   22.80    2.60
  -7  -3  -3    8.10    1.90
   7   3  -3   10.80    2.10
  -7  -3  -3    7.60    1.60
   7  -3   3    8.00    1.20
  -7   3   3    9.30    1.50
  -7   3  -3   10.90    1.40
   7  -3  -3   10.30    2.20
  -7  -3   3    7.80    1.90
  -7  -3   3    8.70    1.90
  -8  -3  -3   42.70    3.20
  -8  -3  -3   37.90    3.50
   8  -3   3   35.30    2.40
  -8   3   3   44.00    3.20
  -8  -3   3   40.10    3.60
  -8   3  -3   42.60    2.70
  -8  -3   3   37.00    3.40
  -9   3   3   40.30    3.50
  -9  -3  -3   43.70    4.20
  -9  -3  -3   48.60    3.70
  -9  -3   3   46.30    4.10
  -9   3  -3   40.50    3.20
  -9  -3   3   35.90    4.00
 -10  -3  -3    1.00    2.70
 -10   3   3    2.60    2.30
 -10  -3  -3    0.50    2.20
 -10  -3   3    0.50    2.60
 -10  -3   3    1.80    2.50
 -10   3  -3    0.30    2.10
 -11  -3  -3    4.90    2.70
 -11   3   3    8.50    2.70
 -11  -3  -3    4.00    3.10
 -11  -3   3    1.80    2.90
 -11  -3   3    6.60    2.90
 -11   3  -3   14.10    2.30
 -12  -3  -3    8.90    3.60
 -12   3   3   10.90    3.20
 -12  -3  -3    8.30    3.20
 -12  -3   3    7.30    3.40
 -13  -3  -3    3.00    3.40
 -13   3   3    3.40    3.90
 -13  -3  -3    1.50    6.70
 -13  -3   3   -2.30    3.30
 -14  -3  -3    4.10    4.60
 -14  -3  -3   -0.70    3.60
 -14  -3   3    8.60    4.30
 -15  -3   3   10.90    5.40
   0   4  -3   -0.50    0.50
   0   4   3    0.50    0.60
   0  -4  -3   -0.20    0.50
   0  -4   3    0.10    0.70
   0   4  -3    0.50    0.60
   0   4   3    0.30    0.50
   0  -4  -3    0.10    0.50
   0  -4  -3    0.30    0.60
  -1   4   3   20.80    1.20
   1   4  -3   21.90    1.30
   1  -4   3   21.40    1.20
  -1   4   3   21.90    1.30
  -1  -4  -3   21.40    1.20
  -1   4   3   22.60    1.30
  -1  -4  -3   25.70    1.40
   1   4  -3   22.70    1.30
   1  -4  -3   22.20    1.40
  -1  -4   3   22.40    1.50
   1   4   3   23.00    1.20
  -1   4  -3   22.40    1.00
  -1   4  -3   20.70    1.40
   1  -4  -3   22.30    1.30
   1   4   3   19.80    1.40
   1  -4  -3   22.90    1.30
  -2  -4  -3  180.68    4.90
  -2   4   3  181.68    5.00
   2   4  -3  180.38    5.00
  -2  -4  -3  184.58    5.00
   2   4  -3  166.18    5.10
   2  -4   3  184.88    4.40
  -2  -4   3  177.48    5.00
   2  -4  -3  183.98    5.00
   2  -4  -3  183.98    5.00
   2  -4  -3  176.28    5.10
  -2  -4   3  182.28    5.30
  -2   4  -3  179.08    4.30
   2   4   3  175.38    4.90
   3   4  -3   24.70    1.80
  -3  -4  -3   28.60    1.80
  -3   4   3   23.00    1.70
  -3  -4  -3   24.30    1.60
  -3  -4   3   23.60    2.60
   3   4   3   22.00    1.60
   3  -4  -3   26.70    1.70
   3  -4  -3   24.50    1.80
  -3  -4   3   26.50    1.80
   4   4  -3    4.10    1.10
  -4  -4  -3    5.60    1.20
  -4  -4  -3    5.60    1.10
  -4   4   3    5.10    1.10
  -4  -4   3    6.00    1.90
   4  -4  -3    5.70    1.20
  -4  -4   3    4.70    1.10
  -5   4   3   94.89    3.50
   5   4  -3   96.09    3.80
  -5  -4   3   95.59    3.70
  -5  -4   3   88.59    4.10
  -6  -4  -3  175.38    5.50
   6   4  -3  169.08    5.80
  -6   4   3  178.48    5.50
   6  -4   3  177.38    4.40
  -6  -4  -3  174.28    5.70
   6  -4  -3  162.88    5.70
  -6  -4   3  172.88    5.70
  -6   4  -3  167.78    4.60
  -6  -4   3  170.18    6.00
   7  -4   3   10.90    1.10
  -7  -4  -3    8.80    2.00
  -7  -4  -3   13.90    1.80
   7   4  -3    6.80    2.10
  -7   4   3   10.40    1.70
  -7  -4   3   10.30    1.90
  -7   4  -3   13.80    1.60
   7  -4  -3   14.50    2.30
  -7  -4   3   12.00    2.20
  -8   4   3   89.99    4.10
  -8  -4  -3   81.79    4.80
  -8  -4  -3   86.69    4.20
   8  -4   3   75.79    3.00
  -8  -4   3   79.59    4.40
  -8   4  -3   80.99    3.20
  -8  -4   3   82.99    4.60
  -9  -4  -3    0.20    2.60
  -9  -4  -3   -0.30    2.00
  -9   4   3    4.40    2.00
  -9   4  -3    2.10    1.60
  -9  -4   3   -0.80    2.30
  -9  -4   3    1.80    2.30
 -10  -4  -3   27.40    3.00
 -10  -4  -3   24.80    3.70
 -10   4   3   35.90    4.10
 -10   4  -3   26.90    3.20
 -10  -4   3   30.10    3.50
 -10  -4   3   24.30    3.50
 -11   4   3   21.40    3.20
 -11  -4  -3   18.70    3.10
 -11  -4  -3   17.40    3.70
 -11  -4   3   24.30    3.70
 -11  -4   3   14.50    3.10
 -12  -4  -3    2.30    3.70
 -12   4   3    6.30    3.20
 -12  -4   3    3.80    3.40
 -12  -4   3    1.50    3.20
 -13  -4  -3    0.20    3.30
 -13  -4  -3    7.20    4.00
 -13  -4   3    3.90    3.60
 -14  -4  -3   22.40    5.20
 -14  -4  -3   24.10    4.60
 -14  -4   3   28.20    4.80
 -15  -4  -3   29.20    5.20
 -15  -4  -3   25.30    6.20
 -15  -4   3   28.20    5.40
   0  -5   3    0.20    0.60
   0  -5  -3   -1.10    0.70
   0   5   3    0.30    0.70
   0   5   3    0.00    0.70
   0   5  -3    0.60    0.60
   0   5  -3    0.20    0.60
   0  -5   3    0.20    1.00
   0  -5  -3   -0.50    0.70
   0  -5  -3   -0.30    0.70
   1   5  -3  414.76   10.70
  -1  -5  -3  439.56   10.90
   1   5  -3  431.26   10.80
  -1   5   3  428.36   10.80
  -1  -5  -3  428.66   10.70
   1  -5   3  437.16   10.50
  -1   5   3  435.06   10.80
  -1   5   3  419.66   10.90
  -1   5  -3  415.66   10.30
  -1   5  -3  426.46   10.70
  -1  -5   3  446.16   11.00
   1  -5  -3  446.56   10.80
   1   5   3  419.56   10.80
   1  -5  -3  429.86   10.80
   1  -5  -3  424.36   10.90
  -1  -5   3  443.16   10.80
   2  -5   3   31.30    1.50
  -2  -5  -3   33.60    2.00
   2   5  -3   32.00    1.90
  -2   5   3   32.20    1.90
  -2   5   3   32.60    1.90
  -2  -5  -3   30.30    1.80
  -2  -5   3   29.20    1.90
  -2  -5   3   31.80    2.60
   2  -5  -3   32.30    1.80
  -2   5  -3   31.10    1.20
   2  -5  -3   32.40    2.10
   2   5   3   29.20    1.80
   2  -5  -3   34.00    1.90
   3   5  -3  447.86   11.20
  -3  -5  -3  455.25   11.20
  -3   5   3  428.66   11.00
  -3  -5  -3  446.16   11.10
   3  -5   3  374.06   10.90
   3  -5  -3  416.36   11.10
  -3  -5   3  455.95   11.60
  -3  -5   3  443.36   11.20
   3  -5  -3  446.46   11.00
  -4   5   3    7.30    1.20
   4   5  -3    7.20    1.40
  -4  -5  -3    6.50    1.10
   4  -5  -3    7.50    1.10
  -4  -5   3    8.50    1.30
  -4  -5   3    7.20    3.50
  -5  -5  -3   55.49    2.90
   5   5  -3   54.39    3.10
  -5  -5  -3   51.29    2.80
  -5   5   3   52.99    2.60
  -5  -5   3   53.19    3.00
  -5  -5   3   53.29    3.50
  -6  -5  -3  479.65   12.50
   6   5  -3  463.05   12.70
  -6  -5  -3  486.55   12.70
  -6   5   3  475.15   12.40
  -6  -5   3  477.95   13.10
  -6  -5   3  476.55   12.60
  -7   5   3   15.60    2.00
  -7  -5  -3   17.00    2.10
   7  -5   3   17.90    1.40
   7   5  -3   13.50    2.50
  -7  -5  -3   18.70    2.40
  -7   5  -3   18.70    1.60
  -7  -5   3   17.20    2.30
  -7  -5   3   13.50    2.40
  -8   5   3   41.60    3.10
  -8  -5  -3   41.80    3.40
  -8  -5  -3   34.90    3.90
   8  -5   3   40.20    2.20
  -8  -5   3   38.80    3.90
  -8   5  -3   37.70    2.30
  -8  -5   3   38.20    3.60
  -9   5   3   33.40    3.70
  -9  -5  -3   37.10    4.60
  -9  -5  -3   31.90    3.60
  -9   5  -3   29.70    2.70
  -9  -5   3   36.80    4.20
  -9  -5   3   35.70    4.00
 -10   5   3   25.70    3.00
 -10  -5  -3   22.10    3.80
 -10  -5  -3   26.60    3.20
 -10  -5   3   27.60    3.50
 -10  -5   3   25.80    3.60
 -11  -5  -3   15.70    3.10
 -11  -5  -3   13.40    3.70
 -11   5   3   17.70    3.20
 -11  -5   3   13.70    3.50
 -12   5   3   -1.90    3.20
 -12  -5  -3    2.20    4.00
 -12  -5  -3   -2.90    2.90
 -12  -5   3   14.60    3.70
 -13  -5  -3    4.60    3.40
 -13  -5  -3   -0.70    4.10
 -13  -5   3   -4.00    3.80
 -14  -5  -3    2.40    4.10
 -14  -5  -3    5.30    4.80
 -14  -5   3   -0.90    4.20
 -15  -5  -3   15.20    5.10
 -15  -5  -3   14.90    6.20
 -15  -5   3   13.40    5.30
   0  -6   3    3.00    1.30
   0  -6   3    0.40    0.90
   0   6  -3   -0.20    0.70
   0   6   3    0.10    0.90
   0  -6  -3    0.40    0.90
   0  -6  -3   -1.80    0.80
   0   6  -3   -0.40    0.90
   1  -6   3  417.16   10.10
   1  -6   3  408.36   10.40
  -1  -6  -3  404.76   10.40
   1   6  -3  406.16   10.40
  -1  -6  -3  409.66   10.40
  -1   6   3  401.06   10.40
  -1   6  -3  413.36   10.40
  -1  -6   3  397.06   10.40
  -1   6  -3  392.56    9.90
   1  -6  -3  410.06   10.40
  -1  -6   3  407.56   10.60
   1   6   3  392.86   10.40
   1  -6  -3  403.16   10.40
   2  -6   3   11.40    1.30
   2  -6   3   13.30    1.30
  -2  -6  -3   13.00    1.50
   2   6  -3   11.70    1.40
  -2   6   3   11.10    1.30
  -2  -6  -3   13.60    1.50
  -2  -6   3   15.20    2.00
  -2   6  -3   13.50    1.10
   2  -6  -3   13.50    1.40
   2  -6  -3   10.70    1.30
  -2  -6   3   13.00    1.40
   3  -6   3   41.20    2.30
  -3  -6  -3   38.30    2.30
   3   6  -3   43.90    2.50
  -3   6   3   45.70    2.30
   3  -6   3   43.90    1.60
   3  -6   3   43.00    1.50
   3  -6  -3   45.90    2.30
  -3  -6   3   41.20    2.50
  -3  -6   3   47.50    3.00
   3  -6  -3   42.60    2.10
  -3   6  -3   43.70    1.50
  -4  -6  -3   17.40    2.30
  -4  -6  -3   20.40    2.00
  -4   6   3   18.40    1.80
   4  -6   3   21.90    2.00
   4   6  -3   19.00    2.00
   4  -6  -3   21.50    1.70
  -4  -6   3   20.80    2.00
  -4  -6   3   22.80    2.90
  -5  -6  -3  351.36    9.50
  -5  -6  -3  350.56    9.60
  -5   6   3  335.27    9.20
   5   6  -3  340.17    9.70
   5  -6  -3  344.97    9.20
  -5  -6   3  357.16    9.60
  -5  -6   3  344.87   10.10
  -6  -6  -3   50.49    3.40
  -6   6   3   46.60    2.80
  -6  -6  -3   44.70    3.00
   6   6  -3   41.60    3.70
  -6  -6   3   40.90    3.40
   6  -6  -3   52.19    2.60
  -6  -6   3   46.80    3.30
  -7  -6  -3   98.49    4.30
  -7  -6  -3   91.99    4.60
  -7   6   3   91.69    4.10
  -7  -6   3   97.49    4.60
  -7  -6   3   90.79    5.10
  -8  -6  -3   25.20    2.70
  -8  -6  -3   17.20    2.90
   8  -6   3   21.20    1.60
  -8   6   3   21.80    2.40
  -8  -6   3   20.60    3.00
  -9  -6  -3    9.60    2.40
  -9   6   3    1.30    2.10
  -9  -6  -3    6.70    2.90
  -9  -6   3    3.90    2.40
  -9  -6   3    3.50    2.60
 -10  -6  -3    0.00    3.20
 -10  -6  -3   -5.10    2.10
 -10   6   3    0.40    2.40
 -10  -6   3   -1.00    2.80
 -10  -6   3    3.30    2.80
 -11  -6  -3    8.00    4.20
 -11  -6  -3   10.60    3.10
 -11   6   3    7.60    3.00
 -11  -6   3    7.20    3.30
 -11  -6   3   12.30    3.60
 -12  -6  -3    7.70    3.30
 -12  -6  -3    4.30    4.20
 -12  -6   3    9.80    3.70
 -13  -6  -3    1.80    4.80
 -13  -6  -3    5.90    3.50
 -13  -6   3    9.70    4.40
 -14  -6  -3   13.10    5.30
 -14  -6  -3    2.90    4.30
 -14  -6   3    1.10    4.50
   0   7  -3    0.30    0.90
   0  -7  -3   -1.30    0.90
   0   7  -3   -1.50    0.70
   0  -7  -3    0.90    1.00
   0  -7   3   -0.20    1.00
   0  -7   3   -0.90    1.10
   1  -7   3   20.10    1.90
   1   7  -3   20.30    2.00
   1  -7   3   22.30    1.80
  -1  -7  -3   21.00    1.70
  -1  -7  -3   17.50    1.80
  -1  -7   3   24.30    2.30
   1  -7  -3   22.80    1.80
   1  -7  -3   23.60    1.90
  -1  -7   3   18.70    1.90
  -1   7  -3   20.10    2.00
  -1   7  -3   16.50    1.40
   2   7  -3  131.59    4.40
  -2  -7  -3  127.19    4.30
   2  -7   3  119.69    4.20
  -2  -7  -3  123.39    4.20
   2  -7   3  129.99    3.70
   2  -7  -3  128.69    4.20
  -2  -7   3  128.69    4.30
  -2   7  -3  126.59    4.20
   2  -7  -3  126.59    4.00
  -2   7  -3  122.89    3.60
  -2  -7   3  129.39    4.60
   3  -7   3  108.09    3.10
   3  -7   3  104.99    3.10
  -3  -7  -3  104.69    3.80
   3  -7   3  106.99    3.90
  -3   7   3  101.39    3.60
   3   7  -3  106.29    4.00
   3  -7  -3  102.09    3.50
  -3  -7   3  111.79    4.00
  -3   7  -3  104.19    3.00
   3  -7  -3  106.39    3.80
  -3  -7   3  107.79    4.50
  -4   7   3  167.58    5.20
   4   7  -3  164.28    5.60
  -4  -7  -3  170.78    5.50
   4  -7   3  166.78    5.30
  -4  -7  -3  173.98    5.40
   4  -7  -3  166.28    5.30
   4  -7  -3  166.08    5.10
  -4  -7   3  169.28    6.00
  -4  -7   3  166.18    5.60
  -5   7   3    4.10    1.30
  -5  -7  -3    4.70    1.60
   5  -7   3    5.00    1.50
   5   7  -3    3.00    1.80
  -5  -7  -3    6.60    1.40
  -5  -7   3    5.40    2.20
   5  -7  -3    5.10    1.20
  -5  -7   3    5.90    1.80
  -6  -7  -3  147.79    5.50
  -6  -7  -3  143.29    5.20
  -6   7   3  144.69    4.90
   6   7  -3  132.09    5.60
  -6  -7   3  137.09    5.90
   6  -7  -3  141.49    4.80
  -6  -7   3  133.39    5.30
  -7  -7  -3  407.46   11.20
  -7  -7  -3  396.56   11.50
  -7  -7   3  384.36   11.80
  -7  -7   3  389.96   11.40
  -8  -7  -3   30.00    2.90
  -8   7   3   29.70    3.20
  -8  -7  -3   28.10    3.30
   8  -7  -3   24.40    2.80
  -8  -7   3   28.80    3.70
  -8  -7   3   29.40    3.10
  -9  -7  -3   91.79    5.10
  -9   7   3   96.19    4.70
  -9  -7  -3   92.09    5.70
  -9  -7   3   93.99    5.70
  -9  -7   3   96.39    5.40
   9  -7  -3   95.59    4.40
 -10   7   3    5.40    2.50
 -10  -7  -3    7.60    3.40
 -10  -7  -3    4.70    2.60
  10  -7  -3    5.50    2.20
 -10  -7   3    6.00    2.80
 -11  -7  -3    5.40    3.90
 -11  -7  -3    6.90    3.20
 -11  -7   3    5.80    5.90
 -11  -7   3    6.50    3.40
 -12  -7  -3   25.50    4.10
 -12  -7  -3   28.70    4.70
 -12  -7   3   29.00    4.80
 -13  -7  -3   -0.20    3.90
 -13  -7  -3    6.80    5.10
 -13  -7   3   23.30    4.30
 -14  -7  -3   20.20    4.90
 -14  -7  -3   30.70    6.20
 -14  -7   3   32.10    5.80
   0  -8   3   -0.80    1.00
   0  -8   3    0.80    1.10
   0   8  -3   -1.20    1.10
   0  -8  -3   -2.20    0.90
  -1  -8  -3   24.60    2.10
   1   8  -3   27.70    2.40
  -1  -8  -3   30.70    2.20
   1  -8   3   24.20    2.20
   1  -8   3   24.90    2.00
  -1  -8   3   28.20    2.50
  -1  -8   3   27.20    2.30
  -1   8  -3   25.90    1.90
  -1   8  -3   22.50    2.40
   1  -8  -3   27.40    2.10
   1  -8  -3   27.90    2.00
   2  -8   3   27.20    1.90
  -2  -8  -3   21.60    2.10
  -2  -8  -3   20.70    2.10
   2  -8   3   19.40    2.30
   2   8  -3   24.60    2.40
  -2  -8   3   20.00    2.20
  -2   8  -3   23.30    1.70
  -2  -8   3   26.00    2.70
   2  -8  -3   22.10    1.80
  -2   8  -3   22.20    2.30
   2  -8  -3   20.10    1.90
   3  -8   3   27.80    1.80
   3  -8   3   30.30    1.80
  -3  -8  -3   29.60    2.40
   3   8  -3   28.10    2.80
  -3  -8  -3   28.50    2.50
   3  -8   3   23.60    2.30
  -3   8  -3   31.00    1.70
  -3  -8   3   26.70    2.70
  -3  -8   3   26.90    3.00
   3  -8  -3   24.50    1.90
   3  -8  -3   27.90    2.30
   4   8  -3    4.00    1.60
  -4  -8  -3    2.50    1.40
   4  -8   3    1.20    0.90
  -4  -8  -3    1.60    1.40
   4  -8   3    1.80    0.80
  -4   8   3    1.90    1.10
   4  -8   3    3.00    1.50
   4  -8  -3    2.40    1.10
  -4  -8   3    1.10    1.60
  -4  -8   3    0.90    2.00
  -5   8   3   96.89    3.90
   5   8  -3   88.19    5.80
  -5  -8  -3   94.29    4.20
  -5  -8  -3   94.19    4.30
   5  -8   3   94.19    4.10
   5  -8  -3   95.89    4.10
  -5  -8   3   91.19    4.40
   5  -8  -3   95.79    3.70
  -5  -8   3   95.19    4.90
  -6  -8  -3   70.99    4.10
   6  -8   3   79.09    4.10
  -6  -8  -3   66.49    3.90
  -6   8   3   68.59    3.50
  -6  -8   3   65.39    4.70
   6  -8  -3   79.49    4.10
  -6  -8   3   76.99    4.40
   6  -8  -3   77.19    3.50
  -7  -8  -3  157.48    6.00
  -7   8   3  143.19    5.40
   7  -8   3  149.59    5.90
  -7  -8  -3  147.99    6.20
   7  -8  -3  149.79    5.10
  -7  -8   3  145.09    6.10
  -7  -8   3  147.39    6.60
  -8  -8  -3   24.00    3.20
  -8  -8  -3   35.30    4.00
  -8   8   3   23.80    2.60
  -8  -8   3   29.10    3.30
   8  -8  -3   28.90    2.90
  -8  -8   3   25.50    3.70
  -9  -8  -3   64.99    4.90
  -9   8   3   55.89    4.00
  -9  -8  -3   51.49    5.20
  -9  -8   3   66.59    5.40
  -9  -8   3   58.09    5.30
   9  -8  -3   66.79    3.80
 -10  -8  -3   18.70    3.10
 -10   8   3   19.20    3.30
 -10  -8  -3   15.60    3.90
  10  -8  -3   14.70    2.80
 -10  -8   3   13.70    3.30
 -10  -8   3   19.30    3.60
 -11  -8  -3    7.00    4.20
 -11  -8  -3   -0.10    3.70
 -11  -8   3    7.80    3.60
 -12  -8  -3   24.00    5.00
 -12  -8  -3   29.00    4.40
 -12  -8   3   34.70    4.80
 -13  -8  -3    1.90    5.00
 -13  -8  -3   -1.60    4.00
 -13  -8   3   12.00    4.40
 -14  -8  -3    0.00    4.40
 -14  -8  -3   -1.40    5.60
   0  -9  -3    1.70    1.20
   0  -9  -3    0.40    1.10
   0  -9   3   -0.60    1.20
   0  -9   3   -1.40    1.30
   0   9  -3    1.00    1.40
   1   9  -3   28.20    2.80
  -1  -9  -3   30.60    2.50
   1  -9   3   27.10    2.60
  -1  -9  -3   32.50    2.40
   1  -9   3   31.70    2.40
   1  -9  -3   29.30    2.20
  -1   9  -3   28.20    2.80
  -1  -9   3   28.60    2.60
   1  -9  -3   27.60    2.60
   2  -9   3    8.50    1.80
  -2  -9  -3    8.00    1.70
   2   9  -3    9.20    1.90
  -2  -9  -3    7.50    1.50
   2  -9   3    8.90    1.40
  -2   9  -3    9.10    1.80
  -2  -9   3    7.70    2.00
   2  -9  -3    7.80    1.60
  -2  -9   3    8.70    1.70
  -2   9  -3    7.40    1.30
   2  -9  -3    9.70    1.40
  -3  -9  -3   23.90    2.60
   3  -9   3   23.00    2.60
   3  -9   3   24.80    2.00
  -3  -9  -3   25.00    2.50
   3  -9   3   23.30    2.00
   3   9  -3   23.00    2.50
  -3   9  -3   23.10    1.90
   3  -9  -3   22.90    2.50
  -3  -9   3   19.40    2.20
  -3  -9   3   19.50    2.50
   4  -9   3    5.20    1.80
   4  -9   3    7.20    1.10
   4  -9   3    4.90    1.20
  -4  -9  -3    7.40    1.70
   4   9  -3    3.60    2.10
  -4  -9  -3    7.50    1.70
   4  -9  -3    6.00    1.70
  -4  -9   3    4.10    1.80
  -4  -9   3    7.00    2.40
   5  -9   3   26.80    2.60
  -5  -9  -3   19.70    2.40
   5   9  -3   23.20    3.90
  -5  -9  -3   20.30    2.40
   5  -9  -3   19.90    2.30
  -5  -9   3   21.60    2.80
  -5  -9   3   21.00    3.00
   6  -9   3   16.90    2.40
  -6  -9  -3   11.70    2.20
  -6   9   3   13.10    2.00
  -6  -9  -3   14.30    2.60
   6  -9  -3   10.70    2.30
  -6  -9   3   14.30    3.10
  -6  -9   3   12.40    2.50
   6  -9  -3   12.30    1.90
  -7   9   3    5.00    2.00
  -7  -9  -3    3.20    2.30
  -7  -9  -3    3.00    2.00
   7  -9   3    5.30    2.40
  -7  -9   3   11.20    2.70
   7  -9  -3    5.30    1.70
   7  -9  -3    2.40    2.20
  -7  -9   3    5.10    2.90
  -8  -9  -3    6.00    2.90
  -8   9   3   12.20    2.30
  -8  -9  -3   10.10    2.70
  -8  -9   3   11.30    3.30
  -8  -9   3   15.40    3.20
   8  -9  -3    8.50    2.00
  -9   9   3  186.78    6.70
  -9  -9  -3  195.28    7.70
  -9  -9   3  202.08    8.20
  -9  -9   3  185.38    8.20
   9  -9  -3  193.78    6.50
 -10  -9  -3    2.90    2.80
 -10  -9  -3    2.90    3.50
 -10  -9   3    7.50    3.50
 -11  -9  -3   34.00    4.10
 -11  -9  -3   27.40    5.00
 -11  -9   3   35.00    4.70
 -12  -9  -3    3.80    3.70
 -12  -9  -3   -3.50    4.40
 -12  -9   3   -0.60    3.80
 -13  -9  -3    9.30    5.20
 -13  -9  -3   16.70    4.60
 -13  -9   3   18.60    5.10
   0 -10   3   -0.50    1.60
   0  10  -3   -0.50    1.80
   0 -10  -3   -0.40    1.30
   0 -10  -3   -2.40    1.20
  -1 -10  -3  119.19    4.50
   1 -10   3  126.69    4.50
   1  10  -3  118.39    5.00
   1 -10   3  122.89    4.90
  -1 -10  -3  122.69    4.70
  -1 -10   3  111.39    4.80
  -1 -10   3  126.09    4.90
   1 -10  -3  123.89    4.80
  -1  10  -3  119.09    4.90
   1 -10  -3  122.79    4.40
  -2 -10  -3   19.90    2.30
   2 -10   3   22.10    2.50
   2 -10   3   22.00    2.50
   2  10  -3   15.00    2.40
  -2 -10  -3   15.70    2.00
  -2  10  -3   15.90    2.30
   2 -10  -3   17.80    2.20
  -2 -10   3   22.30    2.50
   2 -10  -3   19.00    2.30
  -2 -10   3   16.20    2.40
   3 -10   3    2.20    1.40
   3 -10   3    2.10    1.40
   3  10  -3   -0.30    2.10
   3 -10   3   -0.40    1.70
  -3 -10  -3    0.00    1.60
  -3 -10  -3   -0.20    1.50
   3 -10  -3   -0.30    1.30
  -3 -10   3    1.60    1.80
   3 -10  -3   -0.90    1.50
  -3 -10   3    2.30    2.20
  -3  10  -3   -1.60    1.30
  -4 -10  -3    5.90    1.90
   4 -10   3    5.50    1.40
   4 -10   3    5.80    1.50
   4  10  -3    1.50    2.20
   4 -10   3    4.00    2.00
  -4 -10  -3    5.50    2.00
  -4 -10   3    2.20    2.00
  -4 -10   3    4.70    2.40
   4 -10  -3    3.60    1.70
   4 -10  -3    5.40    1.60
  -4  10  -3    5.40    1.30
   5 -10   3    6.50    2.10
  -5 -10  -3    7.90    2.30
  -5 -10  -3    7.50    2.10
   5 -10   3    9.80    1.30
   5 -10  -3    7.50    1.70
  -5 -10   3    6.30    2.80
  -5 -10   3    8.50    2.30
   5 -10  -3    5.00    1.90
  -6 -10  -3  165.78    6.50
  -6 -10  -3  176.78    6.40
  -6  10   3  160.08    5.60
   6 -10   3  155.98    6.40
   6 -10  -3  163.08    5.50
  -6 -10   3  152.58    7.30
   6 -10  -3  160.98    6.30
  -7 -10  -3   23.20    2.90
  -7 -10  -3   22.50    3.30
  -7  10   3   23.30    2.60
   7 -10  -3   28.60    3.20
   7 -10  -3   24.40    2.80
  -7 -10   3   26.60    3.80
  -7 -10   3   24.80    3.40
  -8 -10  -3   13.80    3.00
  -8  10   3   14.70    2.50
   8 -10  -3   15.40    3.00
  -8 -10   3   17.70    3.40
   8 -10  -3   15.30    2.30
  -9 -10  -3   -0.30    3.30
  -9 -10  -3    5.20    2.80
  -9 -10   3    1.00    3.90
   9 -10  -3   -1.40    2.70
  -9 -10   3   -0.50    3.20
 -10 -10  -3   19.80    4.20
 -10 -10   3   26.00    4.10
 -11 -10  -3    1.00    4.30
 -11 -10  -3   -0.10    3.30
 -11 -10   3    9.30    3.60
 -12 -10  -3   -0.80    4.80
 -12 -10  -3    1.90    3.90
 -12 -10   3    5.60    4.10
 -13 -10  -3   34.20    6.30
 -13 -10  -3   37.10    5.60
 -13 -10   3   40.20    5.90
   0 -11   3   -0.70    1.80
   0 -11  -3    1.00    1.60
   0 -11  -3   -0.80    1.40
   0 -11   3   -1.00    1.70
   0  11  -3    1.10    2.10
   1 -11   3   -2.90    1.70
  -1 -11  -3   -0.70    1.50
  -1 -11  -3   -0.50    1.60
   1  11  -3    2.20    1.90
   1 -11  -3    0.00    1.50
   1 -11  -3    0.30    1.80
  -1 -11   3   -0.30    1.80
  -1 -11   3    3.00    2.10
  -1  11  -3    0.70    2.00
   2 -11   3   32.80    3.10
   2  11  -3   26.00    3.00
   2 -11   3   26.30    2.70
  -2 -11  -3   35.00    3.00
  -2 -11  -3   23.50    2.50
   2 -11  -3   27.80    2.80
   2 -11  -3   28.40    2.70
  -2 -11   3   25.80    2.70
  -2 -11   3   31.10    3.20
  -2  11  -3   27.90    2.90
   3 -11   3    8.10    1.80
   3 -11   3    6.90    2.20
  -3 -11  -3    5.90    2.00
  -3 -11  -3    7.00    1.90
   3  11  -3    9.90    3.30
  -3 -11   3    9.40    2.60
   3 -11  -3    4.40    1.70
   3 -11  -3    4.60    2.00
  -3 -11   3    3.00    2.00
  -4 -11  -3   12.00    2.30
  -4 -11  -3   16.80    2.50
   4 -11   3   15.70    1.90
   4 -11   3   10.70    2.40
   4 -11  -3   13.00    2.20
   4 -11  -3   15.10    1.90
  -4 -11   3   10.80    2.40
  -4 -11   3   15.30    3.10
   5 -11   3    9.30    2.30
  -5 -11  -3   11.80    2.70
   5 -11   3   13.30    2.20
  -5 -11  -3   12.20    2.30
  -5 -11   3   13.20    3.00
  -5 -11   3   11.90    3.20
   5 -11  -3   12.50    1.90
   5 -11  -3   14.80    2.60
  -6 -11  -3    3.00    2.50
  -6 -11  -3    7.00    2.30
  -6 -11   3    6.40    2.60
   6 -11  -3    2.90    1.70
   6 -11  -3    4.20    2.30
  -6 -11   3    4.40    2.90
  -7 -11  -3   49.80    6.00
  -7 -11  -3   49.20    4.60
  -7 -11   3   49.70    5.20
  -7 -11   3   50.69    5.30
   7 -11  -3   46.00    4.70
   7 -11  -3   59.49    3.60
  -8 -11  -3   15.90    3.00
  -8 -11  -3    7.90    3.30
  -8 -11   3   14.10    3.70
   8 -11  -3   11.60    2.90
  -8 -11   3    9.30    3.50
  -9 -11  -3   12.10    3.90
  -9 -11  -3   26.90    4.00
  -9 -11   3   25.40    4.30
 -10 -11  -3   70.29    6.50
 -10 -11  -3   68.79    7.10
 -10 -11   3   76.19    6.70
 -11 -11  -3    4.90    4.60
 -11 -11  -3    7.70    3.80
 -11 -11   3    6.40    4.00
 -12 -11  -3    1.20    4.90
 -12 -11  -3    1.40    4.40
 -12 -11   3    6.80    4.30
 -13 -11  -3   -0.60    4.80
   0 -12   3    0.60    2.10
   0 -12  -3   -0.30    1.70
   0 -12  -3    1.50    1.70
   0 -12   3   -0.40    2.00
   1 -12   3   98.59    4.60
  -1 -12  -3   94.29    4.70
   1 -12   3   95.89    5.00
  -1 -12  -3  103.29    4.70
  -1 -12   3   95.59    5.00
   1 -12  -3  101.29    4.80
   1 -12  -3  101.59    4.30
  -1 -12   3   97.59    5.00
   2 -12   3    7.70    2.50
  -2 -12  -3   12.60    2.40
  -2 -12  -3    7.90    2.20
  -2 -12   3   10.50    2.60
   2 -12  -3    8.10    2.20
   2 -12  -3    8.60    1.90
  -2 -12   3    7.20    2.80
   3 -12   3    2.80    2.00
   3 -12   3   -1.30    2.10
  -3 -12  -3   -0.40    1.90
  -3 -12  -3    1.80    2.00
   3 -12  -3   -0.30    2.10
  -3 -12   3   -3.10    2.10
   3 -12  -3    1.20    1.70
  -3 -12   3   -0.80    2.60
  -4 -12  -3   47.20    4.30
   4 -12   3   42.90    4.40
   4 -12   3   45.10    3.40
  -4 -12  -3   38.10    4.10
  -4 -12   3   52.09    4.90
   4 -12  -3   41.60    3.10
   4 -12  -3   43.30    4.10
  -4 -12   3   52.49    4.70
  -5 -12  -3   20.70    3.00
  -5 -12  -3   23.40    3.00
   5 -12  -3   22.10    2.50
  -5 -12   3   22.40    3.60
   5 -12  -3   20.60    2.80
  -5 -12   3   20.50    3.60
  -6 -12  -3    0.70    2.30
  -6 -12   3    3.60    2.60
   6 -12  -3    0.40    1.90
  -6 -12   3   -1.60    3.10
   6 -12  -3   -1.70    2.40
  -7 -12  -3   26.70    3.80
  -7 -12  -3   34.60    3.60
  -7 -12   3   33.80    4.40
   7 -12  -3   33.40    3.70
   7 -12  -3   37.10    3.70
  -8 -12  -3    4.00    2.90
  -8 -12  -3    4.10    3.20
   8 -12  -3    1.40    2.90
  -8 -12   3   -0.10    3.30
  -9 -12  -3   25.60    4.30
  -9 -12  -3   14.80    4.20
  -9 -12   3   31.20    4.60
 -10 -12  -3   -1.70    4.10
 -10 -12  -3    2.90    3.90
 -10 -12   3    6.00    4.20
 -11 -12  -3   -0.10    4.00
 -11 -12  -3    4.30    4.60
 -11 -12   3   12.00    4.40
 -12 -12  -3   14.00    5.70
 -12 -12  -3   21.10    4.90
   0 -13   3    0.70    2.40
   0 -13  -3    3.10    2.10
   0 -13   3   -0.20    2.10
   0 -13  -3   -2.00    1.70
  -1 -13  -3    7.90    2.20
   1 -13   3    7.40    2.50
  -1 -13  -3    7.20    2.40
   1 -13   3    6.80    2.50
   1 -13  -3    6.80    2.10
   1 -13  -3    8.30    2.50
  -1 -13   3    5.70    2.60
  -1 -13   3    6.30    2.70
  -2 -13  -3   30.40    3.10
  -2 -13  -3   27.20    3.60
   2 -13   3   26.10    3.30
   2 -13   3   28.90    2.80
  -2 -13   3   24.40    3.40
   2 -13  -3   34.30    4.10
  -2 -13   3   29.20    3.20
   2 -13  -3   28.20    3.20
  -3 -13  -3  131.99    5.90
  -3 -13  -3  124.79    5.60
   3 -13   3   94.09    6.40
  -3 -13   3  114.99    6.10
   3 -13  -3  122.59    5.90
   3 -13  -3  124.19    4.90
  -4 -13  -3   15.60    2.90
  -4 -13  -3   21.20    3.20
   4 -13  -3   14.90    2.90
   4 -13  -3   16.50    2.30
  -4 -13   3   10.60    2.90
  -4 -13   3   14.50    3.50
  -5 -13  -3    6.30    2.40
   5 -13  -3    2.40    2.50
  -5 -13   3    1.10    3.20
   5 -13  -3    2.50    2.10
  -5 -13   3   -0.80    3.10
  -6 -13  -3   44.30    5.00
  -6 -13  -3   36.40    4.10
   6 -13  -3   52.69    5.00
  -6 -13   3   43.00    4.70
   6 -13  -3   45.30    3.90
  -7 -13  -3   22.00    3.80
  -7 -13  -3   23.70    3.50
  -7 -13   3   24.20    4.50
   7 -13  -3   24.30    3.70
  -8 -13  -3    6.80    3.60
  -8 -13   3    9.50    4.10
  -9 -13  -3    1.70    3.40
  -9 -13  -3   -6.40    3.80
  -9 -13   3    1.30    3.70
 -10 -13  -3    3.50    4.30
 -10 -13  -3   14.90    4.30
 -10 -13   3    8.90    4.50
 -11 -13  -3    3.60    4.50
 -11 -13  -3   -4.80    4.60
 -11 -13   3   12.50    4.80
   0 -14   3   -0.60    2.70
   0 -14  -3   -1.60    2.20
   0 -14  -3    0.20    2.10
   1 -14   3   -0.30    2.50
  -1 -14  -3    5.90    2.70
  -1 -14  -3    0.40    2.30
  -1 -14   3    2.70    3.00
   1 -14  -3    3.80    2.40
   1 -14  -3    1.80    2.10
  -2 -14  -3    7.30    2.60
   2 -14   3    5.30    2.50
  -2 -14  -3    5.90    2.70
  -2 -14   3    3.50    3.10
   2 -14  -3    6.60    2.20
   2 -14  -3    4.60    2.70
  -3 -14  -3   36.70    4.30
  -3 -14  -3   47.80    4.80
   3 -14  -3   39.20    3.70
  -3 -14   3   38.10    5.00
   3 -14  -3   40.50    4.60
  -4 -14  -3   54.89    5.20
  -4 -14  -3   47.40    4.80
   4 -14  -3   51.69    4.10
   4 -14  -3   57.79    4.90
  -4 -14   3   57.99    5.60
  -5 -14  -3   52.19    5.10
  -5 -14  -3   49.80    5.40
  -5 -14   3   43.20    5.70
   5 -14  -3   43.80    5.20
   5 -14  -3   47.90    4.00
  -6 -14  -3   -3.50    3.00
  -6 -14  -3   -2.70    2.90
   6 -14  -3   -2.40    3.10
  -6 -14   3   -1.80    3.80
  -7 -14  -3    9.80    3.80
  -7 -14   3    4.00    4.10
  -8 -14  -3   -3.90    3.50
  -8 -14  -3   -5.20    3.30
  -8 -14   3    4.20    4.10
  -9 -14  -3  101.99    8.00
  -9 -14   3   97.89    7.90
 -10 -14  -3   -2.30    4.40
 -10 -14  -3    5.20    4.70
 -10 -14   3    4.40    4.60
   0 -15  -3   -2.40    2.50
   0 -15   3   -2.60    3.10
   0 -15  -3    0.60    2.50
  -1 -15  -3   14.50    2.90
  -1 -15  -3   15.40    3.10
   1 -15   3   10.80    3.30
  -1 -15   3   15.00    3.60
   1 -15  -3   17.90    2.90
   1 -15  -3   15.60    3.10
  -2 -15  -3   10.50    3.00
   2 -15   3   11.60    3.30
  -2 -15  -3   12.50    3.50
  -2 -15   3    6.70    3.50
   2 -15  -3   15.80    3.30
   2 -15  -3   11.10    2.60
  -3 -15  -3   12.10    3.10
  -3 -15  -3   16.60    3.40
  -3 -15   3   12.70    3.80
   3 -15  -3   11.30    2.60
   3 -15  -3   13.00    3.30
  -4 -15  -3   12.40    3.50
  -4 -15  -3   15.50    3.60
   4 -15  -3   16.90    2.90
  -4 -15   3   12.90    4.10
   4 -15  -3   19.10    3.50
  -5 -15  -3   14.50    3.20
  -5 -15  -3    4.60    3.40
   5 -15  -3   11.20    4.30
  -5 -15   3    4.70    4.00
  -6 -15  -3    1.10    3.60
  -6 -15   3    5.70    4.20
  -7 -15  -3    8.90    3.40
  -7 -15  -3   -7.40    3.60
  -7 -15   3   -3.00    4.10
  -8 -15  -3    0.10    3.90
  -8 -15  -3   -4.30    4.10
  -8 -15   3    5.10    4.30
  -9 -15  -3    9.40    4.80
  -9 -15  -3   -3.00    4.50
  -9 -15   3   16.60    5.00
   0 -16  -3   -2.30    2.70
   0 -16  -3   -2.30    2.90
   0 -16   3   -1.60    3.60
  -1 -16  -3   90.29    6.40
  -1 -16  -3   80.69    5.80
   1 -16   3   79.19    6.40
   1 -16  -3   93.09    5.70
   1 -16  -3   89.39    6.30
  -1 -16   3   89.39    6.90
  -2 -16  -3   -2.80    3.10
  -2 -16  -3    1.30    3.10
   2 -16  -3   -0.50    2.70
  -2 -16   3   -0.90    3.60
   2 -16  -3    1.70    3.10
  -3 -16  -3    7.40    3.30
  -3 -16  -3    1.00    3.20
   3 -16  -3    7.70    3.50
   3 -16  -3    8.50    2.90
  -3 -16   3    6.40    4.00
  -4 -16  -3   10.10    3.70
  -4 -16  -3    4.70    3.50
  -4 -16   3    3.40    4.10
  -5 -16  -3   18.80    3.80
  -5 -16  -3   12.80    4.20
  -5 -16   3   14.20    4.60
  -6 -16  -3   12.00    3.90
  -6 -16  -3    3.40    4.20
  -6 -16   3   15.10    4.90
  -7 -16  -3   15.00    4.10
  -7 -16  -3    2.20    4.20
  -7 -16   3   12.10    4.80
  -8 -16  -3  -10.90    4.40
  -8 -16   3    1.40    4.90
   0 -17   3   -3.20    3.90
   0 -17  -3   -4.50    3.20
   0 -17  -3    1.20    3.30
  -1 -17  -3   -4.40    3.10
  -1 -17  -3    0.60    3.40
  -1 -17   3   -1.60    3.90
   1 -17  -3   -1.50    3.70
  -2 -17  -3   12.80    4.00
  -2 -17  -3    8.70    3.70
   2 -17  -3    5.60    3.50
  -2 -17   3   11.40    4.60
  -3 -17  -3    4.10    5.10
  -3 -17  -3    2.20    3.70
  -3 -17   3    3.40    4.50
  -4 -17  -3    2.20    4.00
  -4 -17  -3   -4.50    3.60
  -4 -17   3   -4.60    4.60
  -5 -17  -3    5.30    5.20
  -5 -17  -3   -6.60    4.00
  -5 -17   3    0.40    4.80
  -6 -17  -3   26.40    5.10
  -6 -17   3   30.60    5.90
  -7 -17  -3    2.00    4.50
  -7 -17   3    7.00    5.20
   0 -18  -3   -0.40    3.80
  -1 -18  -3    8.40    4.10
  -1 -18   3   15.30    5.10
   1 -18  -3   15.00    4.10
  -2 -18  -3    9.30    4.10
  -2 -18   3   12.70    5.30
  -3 -18  -3   52.89    6.60
  -3 -18   3   56.69    6.50
  -4 -18  -3   10.00    5.00
  -4 -18   3   14.40    5.70
  -5 -18  -3   22.50    5.30
  -5 -18   3   33.30    6.30
  -6 -18  -3  -10.10    4.90
  -6 -18   3   -3.60    5.50
   0 -19  -3   -2.00    4.40
  -1 -19  -3   21.60    5.10
  -2 -19  -3   -2.20    4.70
  -2 -19   3   -7.00    5.80
  -3 -19  -3    1.70    5.10
  -3 -19   3    8.50    5.90
  -4 -19  -3   -7.90    5.00
  -4 -19   3    4.30    6.00
   0   0  -4 2939.51   67.79
   0   0   4 2909.81   67.79
   1   0   4    1.60    0.40
  -1   0   4    1.10    0.50
   1   0  -4    1.30    0.40
  -1   0  -4    1.50    0.40
   1   0  -4    1.90    0.60
  -1   0   4    1.80    0.40
  -1   0  -4    0.90    0.40
   1   0   4    2.20    0.40
  -2   0   4   43.00    1.80
   2   0   4   45.40    1.60
  -2   0   4   45.70    1.90
   2   0   4   43.50    1.40
  -2   0  -4   46.50    1.60
  -2   0  -4   47.50    1.50
  -2   0  -4   47.30    1.40
   2   0  -4   46.60    1.60
  -3   0   4  132.09    4.00
   3   0   4  126.59    3.50
   3   0   4  117.39    3.50
   3   0  -4  129.99    3.70
  -3   0  -4  130.39    3.50
  -3   0  -4  128.39    3.50
  -4   0   4 1291.47   30.70
  -4   0  -4 1291.27   30.40
   4   0  -4 1289.97   30.70
  -4   0  -4 1355.06   30.60
   4   0   4 1266.87   30.40
  -4   0   4 1276.97   30.90
  -5   0  -4   12.00    1.50
   5   0   4    9.70    1.30
  -5   0   4    7.10    1.30
  -5   0  -4   11.60    1.30
   5   0  -4    6.10    1.30
  -5   0   4    8.90    1.40
   6   0   4  422.06   11.00
  -6   0  -4  442.56   11.20
  -6   0   4  395.26   12.00
  -6   0   4  451.95   11.40
   6   0  -4  416.56   11.30
  -6   0  -4  445.06   11.00
  -7   0   4    4.60    1.50
  -7   0   4    1.00    1.60
   7   0  -4    1.00    1.70
  -7   0  -4    2.60    1.50
  -7   0  -4    3.80    1.40
  -8   0   4    0.20    2.00
   8   0  -4    0.40    2.30
  -8   0   4    0.50    1.80
  -8   0  -4    2.50    2.00
  -8   0  -4    2.00    1.50
  -9   0   4  191.08    7.00
  -9   0   4  186.68    7.10
  -9   0  -4  196.88    6.80
  -9   0  -4  195.78    6.70
 -10   0   4   42.80    4.50
 -10   0   4   50.39    4.40
 -10   0  -4   49.90    4.30
 -11   0   4  331.37   10.60
 -11   0  -4  318.17   10.10
 -12   0   4   77.09    5.70
 -12   0  -4   76.19    5.70
 -13   0   4    1.10    3.70
 -14   0   4   52.99    5.60
 -15   0   4  139.29    9.80
   0  -1  -4   69.69    2.20
   0  -1   4   67.89    1.70
   0   1   4   68.59    2.20
   0  -1  -4   68.59    2.20
   0   1  -4   65.29    1.70
   0  -1   4   63.49    2.10
   0   1  -4   63.59    2.00
   0  -1  -4   66.09    1.70
  -1  -1  -4  675.93   16.30
  -1  -1  -4  685.33   15.90
   1   1  -4  669.43   16.40
  -1  -1  -4  696.43   16.40
   1  -1   4  685.63   15.90
  -1   1   4  685.03   16.50
   1  -1   4  678.83   16.10
   1   1  -4  675.63   16.00
   1   1   4  688.73   15.90
   1   1   4  680.13   16.30
  -1  -1   4  686.93   16.40
  -1   1  -4  680.03   16.10
  -1   1  -4  670.03   16.10
  -1  -1   4  710.43   16.10
   1   1   4  693.03   16.30
   1  -1  -4  669.83   16.40
  -2   1   4  239.28    6.40
   2  -1   4  237.98    5.90
   2   1  -4  243.38    6.10
   2  -1   4  243.48    5.90
  -2  -1  -4  245.78    5.90
  -2  -1  -4  236.98    6.20
   2  -1   4  228.68    5.90
  -2  -1  -4  246.78    6.10
   2  -1  -4  243.28    6.40
  -2   1  -4  239.48    5.90
   2   1   4  241.78    5.90
  -2  -1   4  231.58    6.30
   2   1   4  241.88    6.10
  -2   1  -4  243.68    6.00
   2  -1  -4  247.88    6.10
   3  -1   4  268.07    7.10
   3  -1   4  288.57    7.00
   3   1  -4  290.37    7.30
   3   1  -4  273.67    7.60
  -3  -1  -4  284.57    7.10
  -3  -1  -4  292.47    7.20
   3  -1  -4  268.77    7.50
  -3   1  -4  285.47    7.00
   3   1   4  289.47    7.20
   3  -1  -4  289.77    7.30
   3   1   4  279.27    7.10
  -3   1  -4  295.47    6.90
   4  -1   4   48.70    1.80
  -4   1   4   51.09    2.50
  -4  -1  -4   50.99    2.20
   4   1  -4   53.59    2.40
  -4  -1  -4   52.89    2.10
  -4  -1   4   47.80    2.70
  -4   1  -4   52.69    1.90
   4  -1  -4   49.40    2.40
  -4  -1   4   53.09    2.40
   4   1   4   45.50    2.00
  -5  -1  -4  512.15   12.70
  -5  -1  -4  511.95   12.40
   5  -1   4  477.45   12.10
   5   1  -4  502.95   12.80
  -5   1   4  504.65   12.90
   5  -1  -4  515.35   12.80
   5   1   4  446.46   12.30
  -5  -1   4  516.75   13.00
  -5  -1   4  504.65   12.70
  -5   1  -4  509.15   12.20
  -6  -1  -4 1057.39   25.20
   6  -1   4  986.50   24.70
   6   1  -4 1030.00   25.50
  -6  -1  -4 1088.69   25.30
  -6   1   4 1005.00   26.30
  -6  -1   4 1061.49   25.70
  -6   1  -4 1055.99   25.00
  -6  -1   4 1062.79   25.50
   6  -1  -4 1060.19   25.50
  -7  -1  -4  245.38    7.10
   7   1  -4  236.28    7.60
  -7   1   4  240.18    7.40
  -7  -1  -4  241.68    7.20
  -7  -1   4  242.48    7.60
  -7  -1   4  246.88    7.40
  -7   1  -4  246.18    7.00
  -8  -1  -4  624.34   15.80
  -8  -1  -4  624.64   15.80
  -8   1   4  635.24   16.10
   8   1  -4  560.14   16.00
  -8  -1   4  605.24   16.00
   8  -1  -4  563.94   16.00
  -8   1  -4  620.84   15.50
  -8  -1   4  626.74   16.20
  -9  -1  -4   66.39    4.00
  -9  -1  -4   63.69    4.50
  -9   1   4   69.59    4.30
  -9  -1   4   65.99    4.20
  -9  -1   4   62.39    4.50
  -9   1  -4   65.99    4.00
 -10  -1  -4  212.68    7.60
 -10   1   4  224.78    8.00
 -10  -1  -4  222.38    8.00
 -10   1  -4  223.98    7.30
 -10  -1   4  212.88    7.80
 -10  -1   4  220.48    8.10
 -11  -1  -4   40.60    4.30
 -11  -1  -4   49.99    4.90
 -11   1   4   51.69    4.80
 -11   1  -4   57.99    4.40
 -11  -1   4   52.69    5.10
 -11  -1   4   46.60    5.10
 -12   1   4  173.38    7.60
 -12  -1  -4  158.58    7.40
 -12  -1   4  165.48    7.50
 -12   1  -4  165.88    7.20
 -13  -1  -4   20.20    4.20
 -13   1   4   22.60    4.70
 -13  -1   4   24.50    4.00
 -14   1   4  132.49    8.50
 -14  -1   4  146.99    8.90
 -15  -1   4    1.10    5.60
   0  -2  -4  155.58    3.90
   0  -2   4  156.38    3.90
   0   2   4  161.98    4.00
   0  -2  -4  152.78    4.30
   0   2   4  160.28    4.30
   0   2  -4  151.78    3.90
   0  -2   4  152.48    4.10
   0   2   4  157.38    4.30
   0   2  -4  152.58    4.10
   0  -2  -4  156.08    4.30
   1   2  -4  313.37    7.60
   1   2  -4  316.27    7.90
  -1  -2  -4  316.17    7.60
   1  -2   4  308.17    7.60
  -1  -2  -4  322.67    7.90
  -1   2   4  299.27    8.00
  -1  -2  -4  312.47    8.00
   1  -2   4  317.07    7.50
   1  -2  -4  313.07    8.00
  -1  -2   4  311.87    7.60
   1   2   4  310.77    7.90
   1   2   4  317.77    7.60
  -1  -2   4  308.67    7.90
   1   2   4  322.57    7.90
  -1   2  -4  309.57    7.60
  -2  -2  -4  125.59    3.40
  -2  -2  -4  121.39    3.70
   2   2  -4  129.29    3.60
   2  -2   4  129.69    3.20
  -2   2   4  131.69    3.90
  -2  -2  -4  130.99    3.60
  -2   2  -4  124.39    3.20
  -2  -2   4  133.39    3.90
  -2   2  -4  126.19    3.20
   2  -2  -4  120.39    3.80
   2   2   4  127.39    3.40
   2   2   4  128.89    3.70
   3  -2   4  162.58    4.00
  -3  -2  -4  158.38    4.40
  -3   2   4  158.48    4.80
  -3  -2  -4  166.48    4.50
   3   2  -4  167.38    4.60
  -3   2  -4  166.78    4.00
  -3   2  -4  164.48    4.10
   3  -2  -4  168.78    4.60
  -3  -2   4  167.58    5.00
   3   2   4  154.98    4.50
   3  -2  -4  156.08    4.70
   3   2   4  156.78    4.40
  -4   2   4  135.09    4.40
  -4  -2  -4  136.99    4.10
   4  -2   4  137.39    3.60
  -4  -2  -4  140.49    4.20
   4   2  -4  137.19    4.40
  -4   2  -4  147.19    3.70
  -4  -2   4  134.49    4.30
   4   2   4  133.69    4.40
  -4  -2   4  130.59    4.70
   4  -2  -4  137.89    4.30
   5   2  -4  290.77    8.20
  -5   2   4  292.87    8.20
  -5  -2  -4  301.47    7.90
   5  -2   4  293.97    7.30
   5  -2  -4  306.17    8.20
  -5  -2   4  295.07    8.10
  -5   2  -4  307.77    7.50
  -5  -2   4  292.67    8.50
  -6   2   4   58.19    2.90
  -6  -2  -4   52.99    2.80
   6  -2   4   53.19    2.10
  -6  -2  -4   55.69    2.70
   6   2  -4   49.80    3.20
   6  -2  -4   56.29    3.30
  -6  -2   4   53.49    3.20
  -6  -2   4   49.80    3.10
  -6   2  -4   56.39    2.50
  -7  -2  -4  575.94   14.40
   7   2  -4  533.85   14.70
  -7  -2  -4  566.04   14.50
  -7   2   4  577.14   14.70
   7  -2   4  528.15   13.60
  -7  -2   4  561.24   14.90
  -7  -2   4  572.14   14.70
  -7   2  -4  576.74   13.90
   7  -2  -4  548.35   14.60
  -8   2   4    3.10    1.70
  -8  -2  -4    2.90    1.60
  -8  -2  -4    3.10    2.10
   8   2  -4    1.70    2.40
  -8   2  -4    2.40    1.60
   8  -2  -4    4.30    2.50
  -8  -2   4    2.20    2.00
  -8  -2   4    3.80    1.90
  -9  -2  -4   62.99    4.00
  -9   2   4   68.29    4.20
  -9  -2  -4   66.79    4.70
  -9   2  -4   53.69    3.70
  -9  -2   4   61.79    4.30
  -9  -2   4   63.39    4.50
 -10   2   4   -1.00    2.20
 -10  -2  -4    0.40    2.10
 -10  -2  -4    1.30    2.70
 -10  -2   4   -1.80    2.30
 -10  -2   4    0.50    2.50
 -11  -2  -4   13.30    3.40
 -11  -2  -4   17.60    2.90
 -11   2   4   15.40    3.00
 -11   2  -4    9.20    2.50
 -11  -2   4   15.90    3.10
 -11  -2   4   12.80    3.10
 -12   2   4   41.50    4.50
 -12  -2  -4   43.90    4.90
 -12  -2  -4   51.39    5.60
 -12  -2   4   38.20    6.40
 -13  -2  -4   76.39    6.60
 -13  -2  -4   63.29    6.10
 -13   2   4   72.69    6.60
 -13  -2   4   79.79    6.80
 -14   2   4   13.40    4.50
 -14  -2   4   10.10    4.40
 -15  -2   4   84.89    8.80
   0  -3   4    0.70    0.50
   0  -3  -4   -0.20    0.40
   0   3   4   -0.70    0.50
   0  -3  -4   -1.10    0.50
   0  -3  -4    0.10    0.60
   0   3  -4    0.60    0.60
   0   3   4    0.50    0.60
   0   3  -4   -0.60    0.40
   0  -3   4    0.20    0.40
   0   3   4    0.40    0.40
   1   3  -4 1992.00   45.80
  -1  -3  -4 1913.31   46.10
  -1  -3  -4 1942.41   45.70
  -1  -3  -4 2029.10   46.10
   1   3  -4 1964.90   46.00
  -1   3   4 2002.40   46.20
  -1   3   4 2003.60   46.10
   1  -3   4 1968.60   45.70
   1  -3   4 1955.30   45.70
  -1  -3   4 1930.51   46.00
  -1   3  -4 1999.90   45.70
   1  -3  -4 1993.00   46.10
   1  -3  -4 1988.00   45.80
  -1  -3   4 1928.31   45.90
   1   3   4 1977.70   45.80
   1  -3  -4 1933.81   46.20
   1   3   4 1909.81   46.00
  -1   3  -4 2014.20   45.70
  -2  -3  -4    1.10    0.70
   2  -3   4    1.30    0.40
  -2   3   4    2.50    0.70
   2   3  -4    2.30    0.90
   2  -3   4    2.30    0.50
  -2  -3  -4    1.70    0.60
  -2   3  -4    2.60    0.40
   2  -3  -4    3.50    0.80
  -2  -3   4    2.40    0.90
   2   3   4    1.70    0.60
   2   3   4    2.10    0.80
   2  -3  -4    1.60    0.70
  -3  -3  -4    2.50    0.80
  -3  -3  -4    3.30    0.90
   3   3  -4    3.30    0.90
  -3   3   4    4.10    1.00
  -3  -3   4    2.00    0.90
  -3  -3   4   -0.40    1.20
   3   3   4    2.60    0.90
   3  -3  -4    2.80    1.10
  -4  -3  -4  353.16    9.20
   4   3  -4  355.56    9.30
  -4  -3  -4  348.77    9.10
  -4   3   4  363.06    9.50
  -4  -3   4  355.86    9.70
  -4  -3   4  360.56    9.30
  -5  -3  -4  110.79    3.90
  -5   3   4  111.29    4.00
   5   3  -4  118.79    4.20
  -5  -3  -4  113.09    3.80
   5  -3   4  114.29    3.00
   5  -3  -4  116.19    4.10
  -5   3  -4  113.29    3.10
  -5  -3   4  108.69    4.00
  -6  -3  -4 1399.16   33.80
  -6   3   4 1402.06   34.00
   6   3  -4 1395.66   34.10
   6  -3   4 1403.56   32.90
  -6  -3  -4 1392.06   34.00
  -6  -3   4 1452.85   34.00
   6  -3  -4 1413.66   34.00
  -6   3  -4 1443.76   33.10
  -6  -3   4 1428.16   34.30
   7   3  -4  347.17   10.20
  -7  -3  -4  352.76    9.90
   7  -3   4  340.17    8.70
  -7  -3  -4  354.16    9.70
  -7   3   4  363.66   10.00
  -7  -3   4  341.97   10.10
   7  -3  -4  342.77   10.00
  -7   3  -4  368.06    9.00
  -7  -3   4  353.66   10.00
   8  -3   4  248.98    7.10
  -8   3   4  274.27    8.30
  -8  -3  -4  277.77    8.50
  -8  -3  -4  267.77    8.10
   8   3  -4  262.47    8.80
  -8  -3   4  272.27    8.60
  -8   3  -4  284.77    7.50
  -8  -3   4  278.47    8.50
  -9   3   4    8.40    2.40
  -9  -3  -4    8.50    2.20
  -9  -3  -4   10.80    2.70
  -9   3  -4   10.40    2.00
  -9  -3   4    8.10    2.70
  -9  -3   4   12.00    2.70
 -10  -3  -4  228.08    7.90
 -10  -3  -4  228.28    8.40
 -10   3   4  245.18    8.20
 -10  -3   4  224.48    8.30
 -10  -3   4  232.78    8.40
 -10   3  -4  234.98    7.30
 -11  -3  -4   -2.60    2.40
 -11  -3  -4    1.40    3.10
 -11   3   4    0.20    2.70
 -11  -3   4   -0.80    2.90
 -11  -3   4   -0.90    2.70
 -12   3   4   54.79    5.70
 -12  -3  -4   46.30    5.10
 -12  -3  -4   49.00    4.90
 -12  -3   4   53.49    5.60
 -13  -3  -4    0.80    3.30
 -13  -3  -4    6.20    4.70
 -13   3   4    2.60    3.80
 -13  -3   4    5.90    3.70
 -14  -3  -4  175.08    9.00
 -14  -3  -4  185.98   10.10
 -14  -3   4  168.38    9.10
 -15  -3   4   19.00    5.40
   0  -4   4    0.30    0.70
   0   4  -4    0.50    0.50
   0   4   4    0.60    0.70
   0  -4  -4    0.70    0.90
   0   4   4    0.30    0.70
   0   4  -4    1.20    0.80
   0   4   4    1.10    0.60
   0  -4  -4    0.80    0.70
   0  -4  -4    0.60    0.60
  -1   4   4  851.71   21.10
   1   4  -4  898.71   20.90
   1   4  -4  842.32   21.10
  -1  -4  -4  873.71   20.90
  -1   4   4  914.01   21.20
   1  -4   4  879.41   20.80
   1  -4   4  890.01   20.70
  -1  -4  -4  893.81   21.10
   1  -4  -4  874.91   21.10
  -1   4  -4  881.71   20.80
   1   4   4  858.31   20.90
  -1  -4   4  876.71   21.10
   1  -4  -4  898.01   20.90
  -1   4  -4  897.41   20.60
   1  -4  -4  837.82   21.20
   2  -4   4   69.59    2.40
   2  -4   4   68.19    1.90
   2   4  -4   68.99    2.50
  -2  -4  -4   70.79    2.50
  -2  -4  -4   71.59    2.70
  -2   4   4   72.39    2.80
   2  -4  -4   72.39    2.50
  -2   4  -4   71.89    1.90
  -2  -4   4   68.59    2.90
   2   4   4   68.59    2.50
   2  -4  -4   70.59    2.60
   2  -4  -4   69.29    2.80
  -3  -4  -4  234.78    6.40
  -3   4   4  235.28    6.70
   3   4  -4  233.78    6.50
  -3  -4  -4  240.38    6.50
   3  -4  -4  236.88    6.50
  -3  -4   4  230.48    6.90
  -3  -4   4  247.68    6.60
   4   4  -4  170.98    5.10
  -4  -4  -4  166.68    5.00
  -4   4   4  165.38    5.10
  -4  -4  -4  171.58    4.90
  -4  -4   4  168.08    5.40
  -4  -4   4  153.88    5.50
  -5  -4  -4  161.58    5.10
  -5   4   4  170.38    5.30
  -5  -4  -4  155.78    5.30
   5   4  -4  172.78    5.50
  -5  -4   4  170.88    5.30
  -6  -4  -4   53.09    2.90
  -6  -4  -4   55.39    3.10
  -6   4   4   54.79    3.00
   6   4  -4   55.79    3.40
  -6  -4   4   54.29    3.50
  -6  -4   4   56.19    3.20
   6  -4  -4   56.39    3.50
   7  -4   4   32.40    1.60
  -7  -4  -4   32.90    2.80
  -7   4   4   32.70    2.90
  -7  -4  -4   31.50    2.90
   7   4  -4   26.80    2.70
  -7  -4   4   32.90    3.30
  -7   4  -4   34.60    1.80
   7  -4  -4   34.00    3.70
  -7  -4   4   32.40    3.20
   8  -4   4   28.70    1.90
  -8  -4  -4   27.90    3.00
  -8   4   4   25.00    3.10
  -8  -4  -4   28.80    3.40
  -8  -4   4   28.80    3.10
  -8  -4   4   25.30    3.00
  -8   4  -4   26.60    2.20
  -9   4   4  353.66   10.60
  -9  -4  -4  366.16   10.60
  -9  -4  -4  360.76   11.00
  -9   4  -4  356.66    9.40
  -9  -4   4  348.37   11.00
  -9  -4   4  369.46   11.10
 -10   4   4    5.80    2.50
 -10  -4  -4    1.90    3.20
 -10  -4  -4    7.30    2.40
 -10  -4   4    6.80    3.00
 -10  -4   4   -4.30    2.60
 -11  -4  -4   92.59    5.60
 -11   4   4  103.39    5.90
 -11  -4  -4   86.19    6.10
 -11  -4   4   89.99    6.30
 -11  -4   4   86.69    5.90
 -12  -4  -4   20.30    4.30
 -12   4   4   23.50    3.80
 -12  -4  -4   17.10    3.40
 -12  -4   4   18.60    3.70
 -13  -4  -4   21.90    4.00
 -13  -4  -4   19.50    4.80
 -13   4   4   22.10    4.60
 -13  -4   4   22.00    4.20
 -14  -4  -4   19.20    4.30
 -14  -4  -4   30.70    5.50
 -14  -4   4   15.00    4.30
 -15  -4  -4   71.19    8.20
 -15  -4   4   82.69    9.10
   0   5  -4  598.54   14.60
   0  -5   4  612.44   14.80
   0  -5  -4  618.04   14.90
   0  -5  -4  610.14   14.70
   0   5   4  581.54   14.70
   1   5  -4  155.28    4.60
  -1   5   4  162.18    4.80
   1  -5   4  157.28    4.40
   1   5  -4  150.58    4.80
  -1  -5  -4  159.08    4.70
  -1  -5  -4  156.38    4.50
  -1   5   4  154.58    4.60
  -1  -5   4  161.98    5.00
   1  -5  -4  164.28    4.80
  -1   5  -4  158.78    4.20
   1   5   4  168.18    4.90
  -1   5  -4  155.08    4.50
   1  -5  -4  158.78    4.60
   2  -5   4 1535.95   35.60
   2   5  -4 1515.55   36.30
  -2  -5  -4 1534.45   36.40
  -2  -5  -4 1536.25   36.20
  -2   5   4 1527.05   36.40
   2  -5  -4 1549.54   36.40
  -2  -5   4 1523.75   36.60
  -2   5  -4 1549.45   35.60
   2  -5  -4 1538.25   36.30
  -2  -5   4 1550.94   36.30
  -3   5   4    6.20    1.30
  -3  -5  -4    5.10    1.00
   3   5  -4    5.40    1.20
  -3  -5  -4    8.80    1.30
  -3  -5   4    3.20    1.60
  -3  -5   4    4.20    1.10
   3  -5  -4    5.80    1.10
  -4   5   4   56.89    2.70
  -4  -5  -4   58.29    2.70
  -4  -5  -4   56.29    2.60
   4  -5  -4   51.99    2.50
  -4  -5   4   58.59    2.90
  -4  -5   4   57.39    3.40
  -5  -5  -4    9.10    1.50
  -5  -5  -4    8.20    1.50
  -5   5   4    5.70    1.30
   5   5  -4    7.60    1.60
  -5  -5   4   10.10    1.70
  -5  -5   4    5.70    1.80
   6   5  -4  254.07    7.90
  -6   5   4  262.57    7.60
  -6  -5  -4  264.77    7.60
  -6  -5  -4  261.27    7.80
   6  -5  -4  265.07    8.00
  -6  -5   4  265.47    7.90
  -6  -5   4  261.97    8.20
  -7  -5  -4    1.80    1.70
   7   5  -4    1.80    1.90
  -7  -5  -4    1.60    1.80
  -7   5   4    2.80    1.70
  -7  -5   4    5.20    2.10
   7  -5  -4    4.90    2.30
  -7  -5   4    2.60    2.00
   8  -5   4  666.93   16.00
  -8  -5  -4  680.53   17.50
  -8  -5  -4  681.73   17.80
  -8   5   4  670.43   17.50
  -8   5  -4  666.93   16.10
  -8  -5   4  668.53   17.70
  -8  -5   4  681.53   18.10
  -9  -5  -4  170.98    6.40
  -9   5   4  167.78    6.50
  -9  -5  -4  166.78    7.10
  -9   5  -4  167.58    5.30
  -9  -5   4  165.28    7.00
 -10  -5  -4  202.68    7.50
 -10  -5  -4  208.38    8.20
 -10   5   4  200.68    7.50
 -10  -5   4  197.98    7.90
 -10  -5   4  207.18    8.10
 -11  -5  -4    4.30    2.60
 -11  -5  -4    2.50    3.40
 -11   5   4    4.80    3.00
 -11  -5   4   11.20    3.40
 -11  -5   4   -2.30    3.30
 -12   5   4  116.49    7.00
 -12  -5  -4  112.59    7.40
 -12  -5  -4   99.49    6.40
 -12  -5   4  119.79    7.20
 -13  -5  -4    7.50    4.90
 -13  -5  -4    6.30    3.60
 -13  -5   4   13.10    4.10
 -14  -5  -4   32.00    4.80
 -14  -5  -4   36.00    5.50
 -14  -5   4   29.40    5.10
 -15  -5  -4    9.80    6.20
 -15  -5  -4   12.40    5.10
 -15  -5   4   11.50    5.40
   0  -6  -4  106.79    3.60
   0  -6   4  106.89    3.80
   0  -6  -4  109.39    3.70
   0   6  -4  106.09    3.60
   0   6  -4  103.39    3.30
   1  -6   4    1.30    1.10
  -1   6   4    1.50    1.00
  -1  -6  -4    1.00    1.00
   1  -6   4    0.00    0.60
   1   6  -4    1.60    1.00
  -1  -6  -4    1.30    0.90
  -1  -6   4    0.60    1.50
   1  -6  -4    0.60    0.80
   1  -6  -4    0.20    0.90
  -1  -6   4    1.00    0.90
  -1   6  -4    0.40    0.90
  -1   6  -4    0.30    0.70
   2  -6   4    1.20    0.70
  -2   6   4    4.10    1.20
   2  -6   4    3.60    1.10
   2   6  -4    3.20    1.10
  -2  -6  -4    3.20    1.00
  -2  -6  -4    2.80    1.10
   2  -6  -4    3.20    1.00
  -2  -6   4    3.20    1.60
  -2  -6   4    3.80    1.10
   2  -6  -4    2.30    1.00
  -2   6  -4    3.10    0.60
  -3   6   4   53.99    2.70
   3   6  -4   61.29    2.90
  -3  -6  -4   60.19    2.80
  -3  -6   4   54.59    3.90
  -3  -6   4   54.79    2.80
   3  -6  -4   63.39    2.60
   3  -6  -4   60.99    2.70
  -4  -6  -4    8.50    1.40
   4  -6   4   10.60    1.40
  -4  -6  -4   12.60    1.60
  -4   6   4    9.50    1.40
   4   6  -4    9.00    1.60
   4  -6  -4   10.20    1.30
  -4  -6   4   11.50    1.70
  -4  -6   4    8.60    2.00
  -5  -6  -4    8.50    1.60
  -5  -6  -4    7.70    1.50
  -5   6   4    6.20    1.30
   5   6  -4    3.80    1.60
  -5  -6   4    4.00    1.90
  -5  -6   4    3.80    1.50
   5  -6  -4    5.10    1.20
  -6  -6  -4   11.20    1.70
  -6   6   4    9.30    3.00
   6   6  -4    9.40    2.20
  -6  -6  -4    9.30    1.90
  -6  -6   4    9.10    2.20
  -6  -6   4   12.30    2.20
   7   6  -4  195.78    7.30
  -7  -6  -4  206.58    6.90
  -7  -6  -4  207.98    6.70
  -7   6   4  208.78    6.70
  -7  -6   4  195.78    7.20
  -7  -6   4  212.28    7.10
  -8  -6  -4    1.10    2.00
  -8   6   4    2.70    1.90
  -8  -6  -4   -1.00    2.30
  -8  -6   4    0.40    2.30
  -8  -6   4    1.20    2.20
  -9   6   4   10.20    2.30
  -9  -6  -4   12.40    2.40
  -9  -6  -4    9.60    2.90
  -9  -6   4   11.50    2.60
  -9  -6   4    6.70    2.70
 -10   6   4   19.40    3.10
 -10  -6  -4   23.50    3.00
 -10  -6  -4   22.00    3.70
 -10  -6   4   23.70    3.70
 -10  -6   4   23.30    3.60
 -11  -6  -4   53.39    5.80
 -11   6   4   49.90    5.20
 -11  -6  -4   50.59    5.70
 -11  -6   4   60.99    5.50
 -12  -6  -4    2.70    3.10
 -12  -6  -4   -5.70    3.70
 -12  -6   4    5.60    3.90
 -13  -6  -4   57.19    5.20
 -13  -6  -4   53.09    6.10
 -13  -6   4   53.49    5.60
 -14  -6  -4   21.40    4.70
 -14  -6  -4   24.40    6.10
 -14  -6   4   25.50    5.30
   0  -7   4  654.13   16.00
   0   7  -4  593.44   15.60
   0  -7  -4  653.83   16.00
   0   7  -4  669.63   16.10
   0  -7   4  638.14   16.00
   0  -7  -4  657.03   16.10
   1  -7   4   28.80    2.10
   1  -7   4   25.40    2.10
  -1  -7  -4   27.90    2.00
  -1  -7  -4   33.70    2.50
   1   7  -4   29.90    2.20
  -1  -7   4   33.60    2.60
   1  -7  -4   31.70    2.10
  -1  -7   4   27.90    2.10
  -1   7  -4   28.20    2.10
  -1   7  -4   27.00    1.60
   1  -7  -4   28.80    2.10
   2   7  -4   40.10    2.50
  -2  -7  -4   38.60    2.40
  -2  -7  -4   39.10    2.40
  -2   7   4   37.40    2.20
   2  -7   4   41.50    2.40
   2  -7   4   42.50    2.10
  -2  -7   4   40.60    2.40
  -2  -7   4   41.30    3.00
  -2   7  -4   36.70    2.30
  -2   7  -4   39.70    1.70
   2  -7  -4   39.20    2.20
   2  -7  -4   41.80    2.30
   3  -7   4    1.10    0.90
   3  -7   4    0.00    1.10
  -3  -7  -4    1.00    1.10
  -3  -7  -4    1.30    1.20
   3  -7   4    2.00    0.70
   3   7  -4    0.70    1.20
  -3   7   4    0.60    1.00
   3  -7  -4    2.00    1.10
  -3   7  -4    1.50    0.60
  -3  -7   4   -0.20    1.60
  -3  -7   4   -0.30    1.20
   3  -7  -4    1.40    1.00
  -4  -7  -4  803.72   20.20
   4   7  -4  811.72   20.30
  -4   7   4  823.02   20.10
   4  -7   4  807.52   20.10
  -4  -7  -4  815.12   20.20
   4  -7  -4  759.32   20.70
  -4  -7   4  834.32   20.80
  -4  -7   4  832.42   20.30
   4  -7  -4  838.72   20.10
  -5  -7  -4  252.87    7.60
  -5   7   4  243.68    7.40
  -5  -7  -4  256.87    7.40
   5  -7   4  260.17    7.40
   5   7  -4  240.18    7.70
  -5  -7   4  251.37    8.10
   5  -7  -4  242.98    7.70
  -5  -7   4  255.97    7.70
  -6  -7  -4  824.12   20.50
  -6   7   4  820.92   20.40
   6  -7   4  821.62   20.40
   6   7  -4  772.62   20.70
  -6  -7  -4  827.72   20.70
   6  -7  -4  820.52   20.20
  -6  -7   4  812.12   21.20
  -6  -7   4  813.72   20.70
  -7  -7  -4   27.40    3.40
  -7  -7  -4   31.00    3.50
  -7   7   4   37.90    3.00
  -7  -7   4   30.00    3.00
  -7  -7   4   32.90    4.00
   7  -7  -4   36.20    2.80
  -8   7   4  151.98    5.90
  -8  -7  -4  158.68    6.50
  -8  -7  -4  151.38    6.00
  -8  -7   4  147.79    6.50
  -8  -7   4  150.68    6.60
   8  -7  -4  150.08    5.60
  -9  -7  -4    6.50    2.40
  -9   7   4    5.00    2.20
  -9  -7  -4    3.80    2.80
  -9  -7   4    5.60    2.50
   9  -7  -4    6.60    2.10
  -9  -7   4    5.30    2.70
 -10   7   4   46.90    4.50
 -10  -7  -4   35.30    3.70
 -10  -7  -4   43.60    5.30
  10  -7  -4   41.30    3.80
 -10  -7   4   44.40    5.20
 -10  -7   4   47.90    5.10
 -11  -7  -4    4.80    2.90
 -11   7   4    0.10    2.90
 -11  -7  -4    1.70    3.60
 -11  -7   4    5.40    3.50
 -12  -7  -4  103.49    8.30
 -12  -7  -4   97.69    6.60
 -12  -7   4  120.19    7.20
 -13  -7  -4   -1.50    3.60
 -13  -7  -4   -0.10    4.90
 -13  -7   4    7.40    4.50
 -14  -7  -4   16.90    4.70
 -14  -7  -4   17.40    6.20
 -14  -7   4   31.20    5.30
   0   8  -4   89.69    3.60
   0  -8  -4   89.09    3.60
   0  -8  -4   91.19    3.60
   0  -8   4   86.49    3.60
   0  -8   4   86.49    3.50
   1  -8   4    1.30    1.20
  -1  -8  -4   -0.80    1.20
  -1  -8  -4    1.40    1.20
   1   8  -4    1.30    1.20
   1  -8   4   -1.60    1.20
   1  -8  -4    0.20    1.10
  -1   8  -4    0.70    1.00
  -1   8  -4   -2.40    1.10
   1  -8  -4    0.90    1.20
  -1  -8   4   -0.40    1.20
  -1  -8   4    1.80    1.50
   2  -8   4   -0.20    1.20
   2  -8   4   -0.80    1.30
  -2  -8  -4   -0.30    1.20
   2   8  -4    1.20    1.30
  -2  -8  -4   -1.30    1.10
  -2  -8   4    0.50    1.20
   2  -8  -4    0.30    1.10
  -2   8  -4   -1.20    1.10
  -2   8  -4   -0.40    0.80
  -2  -8   4   -0.50    1.70
   3  -8   4   35.00    2.10
   3   8  -4   37.10    3.00
   3  -8   4   32.80    1.70
  -3  -8  -4   35.30    2.50
   3  -8   4   30.80    2.50
  -3  -8  -4   35.80    2.60
  -3   8  -4   35.40    1.70
  -3  -8   4   35.20    3.30
   3  -8  -4   36.80    2.60
  -3  -8   4   32.40    2.80
  -4  -8  -4  164.88    5.60
  -4  -8  -4  160.18    5.40
   4   8  -4  166.48    5.70
   4  -8   4  163.28    5.50
   4  -8  -4  164.38    5.50
   4  -8  -4  151.38    5.70
  -4  -8   4  166.98    5.80
  -4  -8   4  164.38    6.30
  -5   8   4   45.40    3.00
   5   8  -4   41.50    3.90
  -5  -8  -4   43.80    3.00
  -5  -8  -4   45.70    3.20
   5  -8   4   44.60    3.20
  -5  -8   4   47.40    4.00
   5  -8  -4   42.10    3.00
   5  -8  -4   44.50    2.70
  -5  -8   4   47.70    3.50
  -6   8   4   57.59    3.30
  -6  -8  -4   57.39    3.70
   6   8  -4   47.90    4.40
   6  -8   4   61.29    3.80
  -6  -8  -4   66.59    4.00
   6  -8  -4   61.99    3.20
  -6  -8   4   63.49    4.20
  -6  -8   4   59.99    4.60
   6  -8  -4   63.89    3.80
  -7  -8  -4    9.50    2.40
   7  -8   4    9.10    2.30
  -7   8   4    7.80    2.00
  -7  -8  -4   11.00    2.30
  -7  -8   4    7.70    2.60
  -7  -8   4    7.90    2.80
   7  -8  -4    7.10    1.80
  -8  -8  -4   35.60    4.30
  -8  -8  -4   45.80    4.20
  -8   8   4   38.20    3.60
  -8  -8   4   40.00    4.60
   8  -8  -4   49.90    3.40
  -8  -8   4   40.90    4.40
  -9  -8  -4   94.39    5.50
  -9   8   4   90.99    4.90
  -9  -8  -4   95.39    5.80
  -9  -8   4   92.09    6.50
  -9  -8   4   92.09    5.70
   9  -8  -4   90.79    4.60
 -10   8   4   44.10    4.40
 -10  -8  -4   41.70    4.80
 -10  -8  -4   34.30    4.40
  10  -8  -4   37.70    3.90
 -10  -8   4   45.60    5.20
 -11  -8  -4   36.10    5.10
 -11  -8  -4   33.90    3.80
 -11  -8   4   32.70    4.50
 -12  -8  -4    8.30    4.80
 -12  -8  -4    2.10    3.40
 -12  -8   4    2.40    4.00
 -13  -8  -4   58.39    6.60
 -13  -8  -4   58.59    6.90
 -14  -8  -4   11.90    4.80
 -14  -8  -4    7.90    6.30
 -14  -8   4   18.80    5.70
   0  -9  -4 1142.09   27.30
   0  -9  -4 1113.29   27.40
   0   9  -4 1110.69   27.40
   0  -9   4 1132.29   27.40
   0  -9   4 1120.49   27.20
   1  -9   4   98.29    3.90
  -1  -9  -4   97.19    3.90
  -1  -9  -4  103.39    4.00
   1  -9   4   92.69    4.10
   1   9  -4   92.59    4.10
  -1  -9   4   96.59    4.80
   1  -9  -4  100.99    3.80
   1  -9  -4   99.59    4.00
  -1   9  -4   97.49    4.10
  -1  -9   4   95.79    4.10
   2  -9   4  206.58    5.90
   2   9  -4  205.98    6.60
   2  -9   4  193.88    6.40
  -2  -9  -4  204.28    6.40
  -2  -9  -4  205.28    6.40
  -2   9  -4  200.08    6.40
   2  -9  -4  202.78    6.20
   2  -9  -4  207.18    6.50
  -2  -9   4  206.38    6.50
  -2   9  -4  198.18    5.70
  -2  -9   4  211.18    6.90
   3  -9   4   53.29    2.70
   3  -9   4   54.49    2.40
   3  -9   4   57.19    3.40
   3   9  -4   54.49    3.70
  -3  -9  -4   52.79    3.20
  -3  -9  -4   59.99    3.20
  -3  -9   4   49.99    3.50
   3  -9  -4   55.29    3.20
  -3  -9   4   57.09    4.10
  -3   9  -4   58.39    2.40
   3  -9  -4   53.39    2.90
   4   9  -4  351.56   10.50
   4  -9   4  368.66   10.20
  -4  -9  -4  364.06   10.30
   4  -9   4  348.37    8.90
  -4   9   4  372.06   10.00
   4  -9   4  350.36    8.90
  -4  -9  -4  360.46   10.20
  -4  -9   4  376.56   10.50
   4  -9  -4  360.36   10.20
   4  -9  -4  364.96    9.90
  -4  -9   4  365.96   10.80
  -5  -9  -4    9.30    2.00
   5  -9   4    8.70    2.00
  -5   9   4   10.80    2.00
  -5  -9  -4   10.30    2.10
   5   9  -4   12.50    2.30
   5  -9  -4    8.90    1.90
  -5  -9   4    9.60    2.60
   5  -9  -4    9.90    1.70
  -5  -9   4   10.80    2.40
  -6  -9  -4   97.29    4.90
  -6   9   4   91.79    4.20
  -6  -9  -4   96.99    4.60
   6  -9   4  100.89    4.80
  -6  -9   4   94.99    5.50
  -6  -9   4  104.69    5.30
   6  -9  -4  101.29    4.20
   6  -9  -4  101.29    4.70
  -7   9   4   20.30    2.50
  -7  -9  -4   20.60    3.10
  -7  -9  -4   18.20    2.60
   7  -9  -4   20.80    2.40
  -7  -9   4   26.50    3.50
   7  -9  -4   24.10    2.90
  -7  -9   4   20.80    3.20
  -8   9   4  390.76   11.20
  -8  -9  -4  398.36   11.70
  -8  -9  -4  386.56   12.10
  -8  -9   4  397.86   12.20
   8  -9  -4  397.16   11.00
  -8  -9   4  382.26   12.40
  -9   9   4    4.60    2.50
  -9  -9  -4    7.70    2.70
  -9  -9  -4    3.30    3.00
  -9  -9   4   10.50    3.10
   9  -9  -4    4.70    2.20
 -10  -9  -4   77.09    6.40
 -10  -9   4   86.79    6.20
 -11  -9  -4   62.39    6.80
 -11  -9  -4   56.29    5.90
 -11  -9   4   53.79    6.00
 -12  -9  -4   18.60    4.00
 -12  -9  -4   29.20    5.40
 -12  -9   4   29.60    4.80
 -13  -9  -4   -1.80    4.30
 -13  -9  -4    0.80    5.00
 -13  -9   4   13.50    4.60
   0  10  -4    5.20    1.90
   0 -10   4    4.90    1.60
   0 -10  -4    5.20    1.60
   0 -10  -4    6.70    1.50
   1 -10   4    0.90    1.60
   1 -10   4    0.20    1.70
  -1 -10  -4   -2.30    1.40
  -1 -10  -4    0.50    1.40
   1  10  -4   -0.40    1.80
   1 -10  -4   -1.30    1.20
  -1 -10   4   -1.20    1.60
  -1  10  -4   -2.30    1.60
  -1 -10   4    1.80    1.80
   1 -10  -4   -0.50    1.40
   2 -10   4  269.47    8.40
  -2 -10  -4  285.77    8.50
   2  10  -4  277.37    8.60
   2 -10   4  281.77    7.90
  -2 -10  -4  291.27    8.40
   2 -10  -4  285.97    8.10
  -2 -10   4  297.47    8.60
  -2 -10   4  279.47    8.70
   2 -10  -4  286.37    8.50
  -2  10  -4  279.37    8.40
  -3 -10  -4    4.30    1.70
   3 -10   4    2.40    1.40
   3  10  -4    5.10    2.20
   3 -10   4    4.50    2.00
   3 -10   4    4.10    1.60
  -3 -10  -4    3.90    1.80
   3 -10  -4    4.10    1.70
  -3  10  -4    1.90    1.30
  -3 -10   4    6.60    2.10
   3 -10  -4    4.90    1.50
  -3 -10   4    4.80    2.40
   4 -10   4   10.40    1.60
  -4 -10  -4   10.50    2.20
  -4 -10  -4    8.80    2.10
   4  10  -4    9.20    2.60
   4 -10   4    9.90    1.40
   4 -10   4    8.90    2.00
  -4  10  -4   12.90    1.40
  -4 -10   4    8.50    2.70
  -4 -10   4    8.50    2.50
   4 -10  -4    9.60    1.80
   4 -10  -4   11.50    2.00
   5 -10   4    5.90    2.20
  -5 -10  -4    4.90    2.00
  -5  10   4    2.10    1.70
  -5 -10  -4    4.20    2.10
  -5 -10   4    5.20    2.80
   5 -10  -4    5.30    2.00
  -5 -10   4    2.50    2.30
   5 -10  -4    4.10    1.80
  -6 -10  -4   59.99    4.30
  -6 -10  -4   66.69    4.10
  -6  10   4   59.19    3.70
   6 -10  -4   55.89    3.50
   6 -10  -4   54.19    4.00
  -6 -10   4   60.29    5.00
  -6 -10   4   68.79    4.90
  -7  10   4    2.00    2.10
  -7 -10  -4    0.90    2.10
  -7 -10  -4    0.00    2.30
  -7 -10   4    4.90    2.90
   7 -10  -4    2.30    1.90
  -7 -10   4    4.10    2.70
   7 -10  -4   -1.50    2.20
  -8 -10  -4   49.99    5.70
  -8  10   4   57.39    4.10
  -8 -10  -4   58.99    4.80
   8 -10  -4   64.49    4.90
  -8 -10   4   57.29    5.50
  -8 -10   4   51.19    5.80
   8 -10  -4   57.99    3.90
  -9 -10  -4   42.40    5.20
  -9 -10  -4   67.29    5.50
   9 -10  -4   42.90    5.10
  -9 -10   4   49.40    5.40
 -10 -10  -4   27.00    3.90
 -10 -10  -4   15.10    4.10
 -10 -10   4   29.30    4.20
 -11 -10  -4   44.40    4.60
 -11 -10  -4   34.90    5.30
 -11 -10   4   46.50    6.10
 -12 -10  -4    4.20    3.60
 -12 -10  -4    0.30    4.70
 -12 -10   4    5.00    4.10
 -13 -10  -4   68.19    7.40
 -13 -10  -4   92.09    8.40
 -13 -10   4  102.49    9.10
   0 -11   4   53.49    3.70
   0 -11  -4   53.39    3.50
   0  11  -4   51.99    4.10
   0 -11   4   55.19    3.80
   0 -11  -4   52.79    3.30
   1 -11   4   16.80    2.30
  -1 -11  -4   18.20    2.20
   1 -11   4   19.30    2.60
  -1 -11  -4   16.00    2.30
   1  11  -4   22.60    2.70
  -1  11  -4   18.70    2.50
  -1 -11   4   14.70    2.30
   1 -11  -4   21.20    2.50
  -1 -11   4   17.90    2.70
   1 -11  -4   18.00    2.30
  -2 -11  -4  216.18    7.00
   2  11  -4  196.58    7.30
   2 -11   4  211.38    6.70
  -2 -11  -4  214.78    7.00
   2 -11   4  211.88    7.30
  -2 -11   4  205.18    7.20
  -2 -11   4  210.58    7.50
   2 -11  -4  209.38    7.10
   2 -11  -4  211.18    6.70
  -2  11  -4  211.88    7.20
  -3 -11  -4   72.49    4.00
   3 -11   4   69.49    4.40
   3 -11   4   68.49    3.70
  -3 -11  -4   64.99    4.00
   3  11  -4   72.19    6.30
   3 -11  -4   72.69    3.60
  -3 -11   4   66.39    4.60
  -3 -11   4   67.09    4.90
   3 -11  -4   72.59    4.20
   4 -11   4  639.64   16.30
  -4 -11  -4  681.83   17.60
  -4 -11  -4  675.73   17.60
   4 -11   4  675.03   17.60
   4 -11  -4  680.43   17.10
  -4 -11   4  656.03   18.10
  -4 -11   4  675.23   17.80
   4 -11  -4  656.33   17.50
  -5 -11  -4   83.79    4.80
  -5 -11  -4   92.09    4.70
  -5 -11   4   89.29    5.30
   5 -11  -4   88.69    4.90
  -5 -11   4   87.69    5.70
   5 -11  -4   91.59    4.20
  -6 -11  -4   92.39    5.30
  -6 -11  -4  104.99    5.20
  -6 -11   4  106.09    6.40
   6 -11  -4   98.89    4.50
   6 -11  -4  100.99    5.40
  -7  11   4   32.70    3.60
  -7 -11  -4   30.40    3.30
   7 -11  -4   30.70    3.40
  -7 -11   4   37.00    6.20
   7 -11  -4   29.40    3.40
  -7 -11   4   27.10    4.30
  -8 -11  -4   60.69    5.20
  -8  11   4   58.99    4.40
  -8 -11  -4   42.60    5.10
   8 -11  -4   66.99    5.30
   8 -11  -4   48.90    3.90
  -8 -11   4   66.49    5.90
  -9 -11  -4    0.70    3.30
  -9 -11  -4    0.50    3.70
   9 -11  -4    0.90    3.10
  -9 -11   4    3.50    3.40
 -10 -11  -4   47.10    5.50
 -10 -11  -4   45.10    4.50
 -10 -11   4   62.89    6.10
 -11 -11  -4    3.80    4.30
 -11 -11  -4    4.60    3.70
 -11 -11   4   14.70    4.30
 -12 -11  -4   43.00    6.60
 -12 -11  -4   60.69    5.90
 -12 -11   4   49.30    5.90
   0 -12  -4  109.19    4.70
   0 -12   4   96.09    4.90
   0 -12  -4  103.09    4.90
   0 -12   4   98.39    5.10
  -1 -12  -4  114.59    5.20
  -1 -12  -4  115.69    4.90
   1 -12   4  112.69    5.10
   1 -12   4  119.29    5.40
   1 -12  -4  116.79    5.30
   1 -12  -4  115.59    4.80
  -1 -12   4  115.69    5.60
  -1 -12   4  115.99    5.50
  -2 -12  -4   32.00    3.30
   2 -12   4   29.60    3.10
  -2 -12  -4   33.00    3.10
   2 -12   4   29.90    3.80
   2 -12  -4   28.80    2.90
  -2 -12   4   31.60    3.50
   2 -12  -4   37.60    3.10
  -2 -12   4   26.00    3.00
  -3 -12  -4  103.19    5.10
   3 -12   4  103.79    4.70
   3 -12   4  107.09    5.50
  -3 -12  -4  108.99    5.10
   3 -12  -4  110.39    5.30
  -3 -12   4   94.29    5.50
   3 -12  -4  101.79    4.60
  -3 -12   4  103.29    6.00
  -4 -12  -4    1.30    2.20
  -4 -12  -4   -0.10    2.10
   4 -12  -4   -0.40    2.00
  -4 -12   4   -3.60    2.40
   4 -12  -4   -2.50    1.70
  -4 -12   4   -1.20    2.70
  -5 -12  -4   60.99    4.30
  -5 -12  -4   47.00    4.40
   5 -12  -4   58.79    4.50
  -5 -12   4   58.39    5.20
  -5 -12   4   55.39    5.40
   5 -12  -4   56.29    3.80
  -6 -12  -4  141.99    6.40
  -6 -12  -4  128.29    7.30
   6 -12  -4  143.09    5.50
   6 -12  -4  138.89    6.50
  -6 -12   4  139.39    7.10
  -7 -12  -4   -2.50    2.30
  -7 -12  -4   -6.40    2.60
  -7 -12   4   -0.60    3.30
   7 -12  -4   -3.60    2.00
   7 -12  -4    0.40    2.70
  -8 -12  -4   -1.50    4.30
  -8 -12  -4   -4.60    2.90
   8 -12  -4    2.90    3.00
  -8 -12   4   -0.30    3.40
  -9 -12  -4   31.60    4.20
  -9 -12  -4   32.80    4.50
  -9 -12   4   35.20    4.80
 -10 -12  -4   -4.90    3.90
 -10 -12  -4   -0.40    3.30
 -10 -12   4    4.80    4.20
 -11 -12  -4   40.80    5.20
 -11 -12  -4   44.40    5.90
 -11 -12   4   57.19    6.80
 -12 -12  -4   -2.60    4.40
 -12 -12  -4    0.70    5.70
   0 -13  -4  126.59    5.30
   0 -13  -4  128.09    5.80
   0 -13   4  130.09    6.00
   0 -13   4  137.69    6.20
  -1 -13  -4  151.68    6.00
  -1 -13  -4  142.79    6.20
   1 -13   4  149.69    6.10
   1 -13  -4  152.28    6.20
  -1 -13   4  157.28    6.60
   1 -13  -4  156.38    5.90
  -1 -13   4  147.59    6.50
  -2 -13  -4  149.69    6.00
   2 -13   4  144.19    5.80
  -2 -13  -4  136.99    6.10
  -2 -13   4  147.49    6.60
   2 -13  -4  147.39    6.30
  -2 -13   4  149.49    6.90
   2 -13  -4  144.99    5.60
  -3 -13  -4   61.49    4.60
   3 -13   4   54.19    4.30
  -3 -13  -4   55.79    4.30
   3 -13  -4   47.40    4.60
   3 -13  -4   61.39    3.80
  -3 -13   4   53.79    6.90
  -3 -13   4   51.29    5.10
  -4 -13  -4  223.68    8.10
  -4 -13  -4  217.88    8.10
   4 -13  -4  221.78    7.30
   4 -13  -4  219.98    8.00
  -4 -13   4  222.08    8.70
  -5 -13  -4   24.10    3.20
  -5 -13  -4   18.80    3.30
   5 -13  -4   16.90    2.90
   5 -13  -4   24.60    2.70
  -5 -13   4   23.40    4.00
  -6 -13  -4   20.60    3.50
  -6 -13  -4   13.10    3.00
   6 -13  -4   26.50    3.50
   6 -13  -4   21.60    2.60
  -6 -13   4   14.50    3.80
  -7 -13  -4   38.40    4.50
  -7 -13  -4   31.90    3.90
   7 -13  -4   38.60    4.20
  -7 -13   4   39.10    4.80
  -8 -13  -4  188.78    8.60
  -8 -13  -4  193.48    8.70
  -8 -13   4  194.38    9.30
  -9 -13  -4    4.80    3.60
  -9 -13  -4   -4.00    3.50
  -9 -13   4    5.60    4.10
 -10 -13  -4   77.49    7.60
 -10 -13  -4   49.50    5.80
 -10 -13   4   71.49    7.20
 -11 -13  -4   12.40    5.40
 -11 -13  -4   11.10    4.80
 -11 -13   4   25.60    5.10
   0 -14  -4   36.60    3.70
   0 -14   4   38.80    4.60
   0 -14  -4   32.00    3.40
  -1 -14  -4  134.79    6.30
   1 -14   4  132.59    6.10
  -1 -14  -4  139.79    5.80
   1 -14  -4  134.09    6.20
  -1 -14   4  135.69    6.90
   1 -14  -4  132.59    5.70
   2 -14   4    2.20    2.60
  -2 -14  -4   -0.90    2.30
  -2 -14  -4   -1.40    2.30
   2 -14  -4    0.80    2.20
   2 -14  -4    0.70    2.60
  -2 -14   4    3.40    3.10
  -3 -14  -4    5.00    2.70
  -3 -14  -4    3.10    2.90
  -3 -14   4    2.40    3.40
   3 -14  -4    0.70    2.20
   3 -14  -4    3.20    2.70
  -4 -14  -4   55.59    5.10
  -4 -14  -4   48.30    5.00
   4 -14  -4   52.79    4.00
   4 -14  -4   54.59    5.20
  -4 -14   4   49.40    6.10
  -5 -14  -4   18.80    3.20
  -5 -14  -4   15.40    3.40
  -5 -14   4   10.70    4.00
   5 -14  -4   21.40    2.80
   5 -14  -4   19.00    3.40
  -6 -14  -4   26.10    3.90
  -6 -14  -4   26.00    3.90
   6 -14  -4   32.80    4.20
  -6 -14   4   33.30    4.60
  -7 -14  -4   -1.70    3.30
  -7 -14  -4    2.60    3.00
  -7 -14   4    1.70    3.80
  -8 -14  -4    3.70    3.60
  -8 -14  -4   -4.50    3.50
  -8 -14   4    4.40    4.20
  -9 -14  -4   23.80    4.60
  -9 -14  -4   10.70    4.30
  -9 -14   4   16.70    4.60
 -10 -14  -4    2.70    4.60
 -10 -14  -4   10.70    4.80
 -10 -14   4   12.00    4.70
   0 -15  -4  187.88    7.10
   0 -15   4  186.88    8.00
   0 -15  -4  191.18    7.80
   1 -15   4   86.89    5.80
  -1 -15  -4   87.99    5.70
  -1 -15  -4   85.99    5.50
   1 -15  -4   79.69    5.00
   1 -15  -4   85.79    5.50
  -1 -15   4   89.59    6.30
  -2 -15  -4   36.40    4.60
  -2 -15  -4   44.20    5.10
   2 -15  -4   40.10    4.20
   2 -15  -4   43.80    4.30
  -2 -15   4   37.50    4.50
  -3 -15  -4   59.99    5.60
  -3 -15  -4   51.59    4.80
   3 -15  -4   54.59    5.70
  -3 -15   4   58.19    6.40
   3 -15  -4   62.09    4.50
  -4 -15  -4  171.38    7.90
  -4 -15  -4  159.08    7.70
  -4 -15   4  159.98    8.30
   4 -15  -4  170.58    6.80
   4 -15  -4  173.78    7.60
  -5 -15  -4   32.80    4.30
   5 -15  -4   33.90    4.00
   5 -15  -4   40.60    4.70
  -5 -15   4   39.50    5.10
  -6 -15  -4   72.59    6.40
  -6 -15  -4   72.99    6.20
  -6 -15   4   84.29    7.20
  -7 -15  -4    7.80    3.50
  -7 -15  -4    0.50    4.10
  -7 -15   4   13.40    4.60
  -8 -15  -4    5.50    4.10
  -8 -15  -4    4.70    4.30
  -8 -15   4    9.30    4.70
  -9 -15  -4   19.70    5.30
  -9 -15  -4   33.50    5.20
  -9 -15   4   26.60    5.30
 -10 -15  -4   63.49    6.80
   0 -16  -4    3.40    4.80
   0 -16  -4    5.80    3.00
   0 -16   4    5.40    3.80
  -1 -16  -4   -1.70    2.90
  -1 -16  -4    3.20    3.00
  -1 -16   4    5.40    3.90
   1 -16  -4    2.50    3.00
   1 -16  -4   -0.60    2.80
  -2 -16  -4   20.30    3.80
  -2 -16  -4   16.70    3.50
   2 -16  -4   13.10    3.10
   2 -16  -4   17.50    3.50
  -2 -16   4   12.60    4.30
  -3 -16  -4   55.99    5.40
  -3 -16  -4   62.39    6.80
  -3 -16   4   51.49    6.70
   3 -16  -4   55.99    6.10
   3 -16  -4   53.19    4.80
  -4 -16  -4    8.90    3.70
  -4 -16  -4   14.50    3.90
  -4 -16   4   10.60    4.60
   4 -16  -4   10.90    3.10
   4 -16  -4   13.50    4.10
  -5 -16  -4   25.80    4.40
  -5 -16  -4   32.10    4.20
  -5 -16   4   25.90    5.00
  -6 -16  -4   -6.00    3.80
  -6 -16  -4   -2.40    3.50
  -6 -16   4    5.00    4.30
  -7 -16  -4   29.80    4.60
  -7 -16  -4   20.10    5.00
  -7 -16   4   25.40    5.30
  -8 -16  -4   -7.30    4.30
  -8 -16  -4   -3.00    4.10
  -8 -16   4    3.00    4.80
   0 -17  -4   10.50    5.70
   0 -17  -4    3.40    3.30
  -1 -17  -4   -2.90    4.50
  -1 -17  -4   -0.60    3.40
  -1 -17   4    0.30    4.20
   1 -17  -4   -4.30    3.30
   1 -17  -4    0.90    3.60
  -2 -17  -4  108.09    7.50
  -2 -17  -4  111.49    6.80
  -2 -17   4  110.19    8.20
   2 -17  -4  110.89    6.40
   2 -17  -4  120.99    7.70
  -3 -17  -4   32.20    4.60
  -3 -17  -4   47.60    5.10
   3 -17  -4   39.90    4.80
  -3 -17   4   35.60    5.60
  -4 -17  -4   92.79    7.50
  -4 -17  -4   93.99    7.30
  -4 -17   4   88.49    8.50
  -5 -17  -4    7.40    3.70
  -5 -17  -4   -9.30    4.00
  -5 -17   4    3.50    4.80
  -6 -17  -4   39.60    5.40
  -6 -17  -4   27.00    5.10
  -6 -17   4   52.49    6.30
  -7 -17  -4   -0.80    4.70
  -7 -17   4   23.90    5.90
   0 -18  -4   18.00    4.20
  -1 -18  -4   23.90    4.60
   1 -18  -4   25.10    4.40
  -2 -18  -4    1.30    4.00
  -2 -18   4    8.40    5.20
   2 -18  -4    6.20    3.90
  -3 -18  -4   22.10    4.80
  -3 -18   4   30.70    6.00
  -4 -18  -4   -4.10    4.20
  -4 -18   4    4.90    5.40
  -5 -18  -4   -2.10    4.90
  -5 -18   4    0.80    5.20
  -6 -18  -4   16.30    8.60
  -6 -18   4   24.10    6.30
   0 -19  -4    5.10    4.80
  -1 -19  -4   -3.20    4.40
   1 -19  -4    3.90    4.40
  -2 -19  -4   48.40    5.80
  -3 -19  -4   -3.80    4.70
  -3 -19   4   -3.80    5.80
  -4 -19  -4   26.00    5.90
  -4 -19   4   37.80    6.80
   0   0  -5    1.40    0.50
   0   0   5    1.00    0.50
  -1   0   5    0.20    0.30
   1   0  -5    0.60    0.50
   1   0  -5   -0.30    0.30
  -1   0   5   -0.20    0.60
   1   0   5    0.50    0.50
  -1   0  -5    0.40    0.40
  -1   0  -5    0.40    0.40
  -2   0  -5    0.20    0.50
  -2   0   5    0.40    0.50
   2   0  -5   -0.20    0.50
   2   0   5   -0.40    0.30
  -2   0  -5   -0.60    0.50
   2   0   5    0.00    0.50
  -2   0   5   -0.20    0.60
   2   0   5    0.30    0.50
  -2   0  -5    0.00    0.30
   2   0  -5    0.60    0.70
  -3   0  -5   -0.20    0.60
  -3   0  -5    0.70    0.60
   3   0   5    0.50    0.60
   3   0   5    0.00    0.60
  -3   0  -5    0.60    0.70
  -3   0   5    0.00    0.90
   3   0  -5   -0.10    0.60
  -4   0  -5   -0.80    0.80
   4   0   5    1.70    0.80
  -4   0   5    0.00    0.90
   4   0  -5    0.00    1.00
  -4   0  -5    0.60    0.70
  -4   0   5   -1.20    1.10
  -5   0  -5    0.50    0.70
  -5   0  -5    1.50    1.00
   5   0   5    1.00    0.80
  -5   0   5    0.40    1.00
   5   0  -5   -1.00    1.10
  -5   0   5   -1.00    1.00
  -6   0   5   -0.90    1.30
  -6   0  -5    0.60    1.10
  -6   0   5    2.00    1.30
   6   0  -5   -3.40    1.40
  -6   0  -5    0.30    1.00
  -7   0   5    2.10    1.50
  -7   0  -5   -0.10    1.40
   7   0  -5    0.80    1.80
  -7   0  -5    1.40    1.20
  -7   0   5   -0.60    1.60
  -8   0  -5   -1.00    1.80
  -8   0   5    2.10    1.70
  -8   0   5   -4.60    1.80
  -8   0  -5   -2.00    1.40
   8   0  -5    0.20    2.30
  -9   0   5    2.70    2.30
  -9   0  -5   -0.50    1.80
  -9   0   5    2.30    2.00
  -9   0  -5   -1.90    2.20
 -10   0  -5   -0.40    2.50
 -10   0   5   -0.10    2.30
 -11   0  -5    1.00    2.70
 -11   0   5    0.10    2.60
 -12   0  -5    2.30    3.10
 -12   0   5   -1.80    3.30
 -13   0   5    5.60    3.90
 -14   0   5    5.80    4.60
 -15   0   5   -1.20    5.00
   0  -1  -5    0.60    0.50
   0  -1   5    0.70    0.50
   0   1  -5    0.10    0.20
   0   1   5    0.20    0.50
   0  -1  -5    0.00    0.20
   0  -1   5    0.40    0.20
   0   1  -5    0.50    0.40
   0  -1  -5    0.20    0.40
   1  -1   5    7.30    0.80
   1   1  -5    7.50    0.90
   1  -1   5    7.40    0.40
  -1  -1  -5    7.80    1.00
  -1  -1  -5    8.20    0.80
   1   1  -5    7.70    0.60
  -1  -1  -5    8.10    0.50
  -1   1   5    6.90    0.90
  -1   1  -5    7.60    0.70
   1   1   5    8.30    0.90
   1  -1  -5    8.00    0.70
   1   1   5    8.30    0.50
  -1  -1   5    7.70    0.70
  -1   1  -5    8.50    0.90
  -1  -1   5    7.40    0.90
   1  -1  -5    8.50    1.10
   1   1   5    9.90    0.90
   2  -1   5  750.22   18.10
   2   1  -5  732.03   18.50
   2  -1   5  780.12   18.10
  -2  -1  -5  775.52   17.90
  -2  -1  -5  775.42   18.40
  -2  -1  -5  784.72   18.30
   2   1  -5  794.92   18.10
   2  -1   5  727.93   17.80
  -2   1   5  786.12   18.60
  -2   1  -5  751.22   18.10
   2   1   5  765.82   17.90
  -2  -1   5  745.23   18.50
  -2   1  -5  763.72   18.00
  -2  -1   5  786.52   18.10
   2   1   5  770.72   18.30
   2  -1  -5  779.42   18.10
   2  -1  -5  716.63   18.50
   3   1  -5   93.49    3.10
  -3  -1  -5   98.49    3.00
   3  -1   5   98.39    3.00
  -3  -1  -5   97.19    2.80
   3  -1   5   92.59    2.70
  -3  -1  -5   90.29    3.00
  -3   1  -5   94.29    2.70
   3   1   5   90.09    3.00
  -3   1  -5   94.39    2.80
  -3  -1   5   87.49    3.30
   3   1   5   93.99    3.00
   3  -1  -5  100.49    3.10
  -4  -1  -5  834.72   19.30
   4   1  -5  809.22   19.50
  -4   1   5  811.82   19.80
  -4  -1  -5  845.22   19.30
   4  -1   5  808.22   19.00
  -4  -1   5  724.23   19.40
   4  -1  -5  827.02   19.50
  -4   1  -5  759.02   19.00
   4   1   5  766.72   19.30
  -4   1  -5  825.52   19.00
  -4  -1   5  827.62   19.90
  -5  -1  -5   18.80    1.80
  -5   1   5   17.60    1.90
  -5  -1  -5   17.10    1.50
   5  -1   5   16.50    1.40
   5   1  -5   18.60    2.20
  -5   1  -5   16.20    1.40
   5  -1  -5   19.90    1.90
  -5  -1   5   14.70    1.60
  -6  -1  -5  620.94   15.20
  -6   1   5  614.34   15.90
  -6  -1  -5  620.54   15.40
   6  -1   5  577.94   14.90
   6   1  -5  614.54   15.70
  -6  -1   5  627.14   16.00
   6  -1  -5  611.44   15.70
  -6  -1   5  620.34   15.60
  -6   1  -5  629.24   15.10
  -7  -1  -5    8.00    1.50
  -7  -1  -5    5.90    1.50
  -7   1   5    4.80    1.70
   7   1  -5    5.80    2.00
   7  -1  -5    6.40    1.90
  -7  -1   5    5.10    1.80
  -7   1  -5    8.00    1.70
  -7  -1   5    5.90    1.70
  -8  -1  -5   15.80    2.00
   8   1  -5   10.50    2.60
  -8   1   5   17.20    2.30
  -8  -1  -5   12.40    2.30
  -8  -1   5   16.40    2.50
  -8   1  -5   16.10    2.30
  -8  -1   5   10.00    2.30
   8  -1  -5   12.40    2.50
  -9  -1  -5  153.68    6.30
  -9   1   5  163.78    6.30
  -9  -1  -5  159.78    5.90
  -9  -1   5  141.29    6.10
  -9  -1   5  154.18    6.30
  -9   1  -5  159.38    6.00
 -10  -1  -5   22.80    3.20
 -10  -1  -5   26.90    2.90
 -10   1   5   23.50    3.10
 -10  -1   5   25.20    3.30
 -10   1  -5   28.70    3.70
 -11  -1  -5   -0.10    2.90
 -11   1   5    0.00    2.60
 -11  -1  -5   -0.90    2.40
 -11  -1   5   -1.30    2.90
 -11  -1   5    1.70    2.70
 -11   1  -5    1.70    2.60
 -12  -1  -5   27.50    3.90
 -12   1   5   23.60    3.80
 -12  -1   5   27.10    5.40
 -13   1   5   14.60    4.00
 -13  -1   5   18.60    4.20
 -14   1   5    1.10    4.40
 -14  -1   5   -0.70    4.70
 -15   1   5    7.40    6.90
 -15  -1   5    7.70    5.00
   0   2   5    1.10    0.60
   0   2  -5    0.50    0.30
   0   2  -5    1.10    0.50
   0  -2   5    0.50    0.50
   0   2   5   -0.20    0.60
   0  -2  -5   -0.10    0.30
   0  -2   5    0.20    0.30
   0  -2  -5   -0.10    0.60
   0  -2  -5   -0.40    0.50
   1   2  -5  321.97    8.30
  -1  -2  -5  326.07    8.40
  -1  -2  -5  334.97    7.90
  -1   2   5  326.07    8.50
   1  -2   5  320.07    8.10
   1   2  -5  328.47    8.00
   1  -2   5  334.77    7.80
  -1  -2  -5  329.77    8.30
  -1  -2   5  330.87    8.00
  -1  -2   5  327.47    8.40
   1  -2  -5  323.07    8.40
   1   2   5  325.97    8.40
   1  -2  -5  310.67    8.50
  -1   2  -5  328.37    8.10
   1   2   5  326.67    7.90
   1   2   5  333.57    8.40
  -2  -2  -5   43.10    1.90
   2  -2   5   45.70    1.60
  -2   2   5   44.90    2.10
  -2  -2  -5   48.80    1.90
  -2  -2  -5   45.60    1.60
   2   2  -5   46.50    1.80
  -2   2  -5   46.90    1.60
  -2   2  -5   46.10    1.50
   2   2   5   47.10    1.60
  -2  -2   5   46.70    2.20
   2  -2  -5   41.40    2.10
   2   2   5   45.10    1.90
  -2  -2   5   42.00    1.80
  -3  -2  -5  108.69    3.30
   3   2  -5  101.69    3.60
   3  -2   5  103.29    2.80
  -3   2   5  102.59    3.60
  -3  -2  -5  104.19    3.10
  -3  -2  -5   97.69    3.40
  -3   2  -5  102.09    2.80
   3   2   5   97.69    3.30
  -3  -2   5  104.09    3.80
  -3   2  -5  106.49    2.80
  -4  -2  -5    7.40    1.20
   4  -2   5    5.60    0.70
   4   2  -5    5.70    1.30
  -4   2   5    3.80    1.10
  -4  -2  -5    7.50    1.00
  -4   2  -5    7.10    0.80
  -4  -2   5    7.50    1.30
   4  -2  -5    7.10    1.30
  -4  -2   5    5.80    1.60
  -4   2  -5    8.00    0.90
  -5   2   5    3.10    1.30
  -5  -2  -5    1.50    1.00
  -5  -2  -5    3.30    1.10
   5  -2   5    2.00    0.70
   5   2  -5    2.20    1.40
  -5  -2   5    1.00    1.20
   5  -2  -5    1.50    1.30
  -5  -2   5    0.20    1.30
  -5   2  -5    3.40    0.90
  -6   2   5   46.50    2.80
   6   2  -5   45.60    3.10
   6  -2   5   46.20    2.00
  -6  -2  -5   48.90    2.50
  -6  -2  -5   47.20    2.70
   6  -2  -5   47.20    3.20
  -6  -2   5   46.80    2.90
  -6  -2   5   39.90    3.00
  -6   2  -5   48.70    2.40
  -7  -2  -5   66.29    3.40
   7   2  -5   61.29    4.10
  -7  -2  -5   65.79    3.20
   7  -2   5   59.79    2.60
  -7   2   5   65.79    3.60
   7  -2  -5   62.29    4.00
  -7   2  -5   65.39    3.10
  -7  -2   5   63.09    3.70
  -7  -2   5   65.49    3.80
   8   2  -5   25.80    3.00
  -8   2   5   29.00    3.30
  -8  -2  -5   35.00    3.40
   8  -2   5   39.50    3.80
  -8  -2  -5   33.30    2.90
  -8  -2   5   34.10    3.60
  -8   2  -5   35.10    3.00
   8  -2  -5   30.00    3.20
  -8  -2   5   35.00    3.60
  -9  -2  -5   12.30    2.20
  -9  -2  -5   12.70    2.70
  -9   2   5   15.60    2.60
  -9   2  -5   10.60    2.20
  -9  -2   5    7.40    2.40
  -9  -2   5   14.40    2.80
 -10   2   5   -2.30    2.20
 -10  -2  -5   -0.90    2.00
 -10  -2  -5   -0.50    2.80
 -10  -2   5    4.30    2.60
 -10   2  -5   -3.10    2.20
 -11   2   5   26.50    3.60
 -11  -2  -5   32.40    3.40
 -11  -2  -5   27.10    3.80
 -11  -2   5   28.70    3.80
 -11  -2   5   22.90    3.60
 -11   2  -5   29.50    4.30
 -12   2   5    9.40    3.50
 -12  -2  -5   20.00    3.30
 -12  -2  -5   14.80    3.90
 -12  -2   5   10.40    3.20
 -13  -2  -5   13.80    4.20
 -13  -2  -5   13.00    3.80
 -13  -2   5   12.90    4.00
 -14   2   5    7.90    4.90
 -14  -2   5   19.70    4.60
 -15  -2   5    1.40    5.40
   0   3   5    0.40    0.70
   0  -3  -5   -0.40    0.60
   0  -3  -5    1.20    0.70
   0  -3   5    0.20    0.50
   0  -3  -5    0.10    0.50
   0  -3   5   -1.10    0.60
   0   3   5    0.50    0.50
   0   3   5    0.00    0.60
   0   3  -5    0.00    0.70
   0   3  -5    0.40    0.40
  -1  -3  -5  234.68    6.20
   1   3  -5  225.88    5.80
   1  -3   5  232.28    5.70
   1   3  -5  223.38    6.10
  -1   3   5  226.48    6.30
  -1  -3  -5  206.58    6.20
  -1  -3  -5  228.98    5.70
   1  -3   5  216.88    5.80
  -1   3  -5  222.88    5.70
  -1  -3   5  229.48    6.10
  -1  -3   5  235.08    5.80
  -1   3  -5  229.28    5.70
   1  -3  -5  222.08    6.30
   1  -3  -5  231.08    6.20
   1   3   5  236.88    6.30
   1  -3  -5  229.88    5.80
   1   3   5  222.68    5.80
   1   3   5  225.48    6.20
   2  -3   5    0.70    0.60
  -2   3   5    1.10    0.90
   2   3  -5    0.60    0.70
  -2  -3  -5    0.30    0.80
   2   3  -5    0.50    1.10
  -2  -3  -5    0.80    0.60
   2  -3   5    0.30    0.50
   2   3   5    0.80    0.60
   2  -3  -5    1.30    0.80
  -2  -3   5    0.00    1.00
  -2   3  -5    0.10    0.40
  -2   3  -5    1.80    0.60
  -2  -3   5    1.20    0.80
   3   3  -5  817.52   20.40
  -3   3   5  833.52   20.60
  -3  -3  -5  852.41   20.40
  -3  -3  -5  846.12   20.10
  -3   3  -5  855.31   19.70
  -3  -3   5  860.11   20.70
  -4   3   5   94.99    3.70
   4   3  -5   99.79    3.60
  -4  -3  -5  102.69    3.40
  -4  -3   5   92.89    3.50
   4  -3  -5  106.59    3.70
  -4  -3   5   97.09    4.10
  -5  -3  -5   16.10    1.80
   5  -3   5   15.20    1.00
  -5  -3  -5   17.60    1.90
  -5   3   5   16.90    2.00
   5   3  -5   17.30    1.80
   5  -3  -5   16.40    1.80
  -5  -3   5   17.10    2.10
  -5  -3   5   12.30    1.50
  -5   3  -5   15.80    1.10
  -5   3  -5   15.50    1.30
   6   3  -5    2.40    1.60
  -6  -3  -5    2.50    1.40
   6  -3   5    2.70    0.80
  -6   3   5    2.30    1.40
  -6  -3  -5    2.60    1.20
  -6  -3   5    2.70    1.50
   6  -3  -5    1.10    1.60
  -6   3  -5    0.60    0.90
  -6  -3   5    1.00    1.50
   7  -3   5    9.40    1.10
  -7  -3  -5   10.40    1.70
  -7  -3  -5    8.80    1.90
   7   3  -5    9.50    2.20
  -7   3   5    9.90    1.90
  -7  -3   5    8.50    2.00
  -7   3  -5    7.80    1.30
   7  -3  -5    8.70    2.30
  -7  -3   5    8.00    2.10
  -8   3   5  177.58    6.30
  -8  -3  -5  168.98    6.20
  -8  -3  -5  170.88    5.80
   8  -3   5  159.48    4.80
   8   3  -5  165.48    6.80
   8  -3  -5  154.38    6.50
  -8   3  -5  165.68    5.10
  -8  -3   5  166.88    6.30
  -8  -3   5  166.88    6.40
  -9  -3  -5   16.30    3.00
  -9  -3  -5   16.80    2.40
  -9   3   5   20.40    2.90
  -9  -3   5   17.10    2.90
  -9  -3   5   16.30    2.90
  -9   3  -5   18.40    2.10
 -10   3   5    3.70    2.60
 -10  -3  -5    8.60    2.30
 -10  -3  -5    6.50    2.90
 -10  -3   5    4.00    2.50
 -10   3  -5    4.60    2.20
 -10  -3   5    6.20    2.90
 -11  -3  -5   32.60    3.50
 -11   3   5   39.00    5.10
 -11  -3  -5   34.30    4.30
 -11  -3   5   36.40    4.10
 -12   3   5    6.40    3.70
 -12  -3  -5   10.60    4.00
 -12  -3  -5    9.00    3.00
 -12  -3   5   12.20    3.50
 -13  -3  -5   13.10    3.60
 -13  -3  -5    6.90    4.40
 -13   3   5    8.30    4.40
 -13  -3   5   10.10    3.80
 -14  -3  -5   24.50    4.30
 -14  -3   5   30.20    5.00
 -15  -3   5   33.50    5.60
   0   4   5   -0.80    0.90
   0  -4  -5    0.00    0.60
   0  -4   5   -0.10    0.90
   0  -4  -5   -0.50    0.80
   0   4  -5    1.00    1.00
   0  -4   5    0.70    0.60
   0   4  -5   -0.60    0.60
   0   4   5    1.00    0.60
  -1  -4  -5  680.43   16.40
   1   4  -5  681.73   16.10
  -1   4   5  677.23   16.50
   1  -4   5  668.83   16.00
   1  -4   5  659.53   15.90
  -1  -4  -5  661.63   16.00
   1   4  -5  633.34   16.40
   1  -4  -5  682.33   16.50
   1  -4  -5  672.43   16.10
  -1  -4   5  664.23   16.10
  -1   4  -5  660.83   16.00
  -1   4  -5  682.83   16.00
  -1  -4   5  665.53   16.40
   2  -4   5  282.97    7.30
  -2  -4  -5  286.97    7.30
   2  -4   5  277.17    6.90
  -2   4   5  290.27    7.80
   2   4  -5  283.57    7.40
  -2  -4  -5  291.37    7.70
   2  -4  -5  271.97    7.60
  -2   4  -5  295.87    7.00
   2  -4  -5  287.57    7.40
  -2  -4   5  276.77    7.80
   3  -4   5   88.69    3.00
  -3   4   5   91.29    3.40
  -3  -4  -5   91.49    3.30
  -3  -4  -5   90.99    3.10
   3   4  -5   91.29    3.30
   3  -4  -5   97.49    3.40
  -3  -4   5   86.39    3.70
   4   4  -5   68.99    3.00
  -4  -4  -5   70.89    2.80
  -4  -4  -5   64.69    2.70
  -4   4   5   72.69    3.10
  -4  -4   5   56.69    3.80
  -4  -4   5   67.99    3.00
   5   4  -5    2.00    1.30
  -5  -4  -5    1.80    1.10
  -5  -4  -5    1.20    1.20
  -5   4   5    1.10    1.20
  -5  -4   5    2.60    1.40
   5  -4  -5    1.80    1.50
  -5  -4   5   -1.30    1.40
   6   4  -5   97.29    4.40
  -6   4   5  106.09    4.30
  -6  -4  -5  105.39    4.10
  -6  -4  -5   98.39    3.90
   6  -4  -5   95.99    4.30
  -6  -4   5   95.29    4.40
  -6  -4   5   95.29    4.20
   7  -4   5  116.49    3.30
  -7  -4  -5  122.89    4.80
   7   4  -5  111.29    5.10
  -7   4   5  125.99    4.90
  -7  -4  -5  118.89    4.50
   7  -4  -5  122.19    5.30
  -7  -4   5  120.89    5.10
  -7   4  -5  110.09    3.40
  -7  -4   5  116.49    5.00
   8  -4   5   20.40    1.80
  -8   4   5   24.70    2.70
   8   4  -5   19.30    3.20
  -8  -4  -5   25.30    2.50
  -8  -4  -5   23.70    2.80
  -8   4  -5   20.10    2.00
  -8  -4   5   19.10    2.70
  -8  -4   5   23.60    3.10
   8  -4  -5   26.20    3.30
  -9   4   5   77.09    4.60
  -9  -4  -5   69.99    5.00
  -9  -4  -5   72.69    4.20
  -9   4  -5   69.89    3.20
  -9  -4   5   69.09    5.00
  -9  -4   5   67.69    5.00
 -10   4   5    2.90    2.50
 -10  -4  -5   -0.30    2.00
 -10  -4  -5    1.10    2.90
 -10  -4   5   -3.00    2.70
 -10  -4   5    1.90    2.60
 -11  -4  -5    5.50    2.70
 -11  -4  -5    6.70    3.60
 -11   4   5    5.40    3.00
 -11  -4   5    0.60    5.10
 -12  -4  -5   20.70    3.50
 -12  -4  -5   24.80    4.50
 -12   4   5   20.30    4.00
 -12  -4   5   21.00    3.90
 -13   4   5    6.40    4.20
 -13  -4  -5    8.50    3.40
 -13  -4  -5    4.90    4.60
 -13  -4   5    6.30    3.70
 -14  -4  -5   11.40    4.80
 -14  -4  -5    0.40    3.90
 -14  -4   5    5.40    4.40
 -15  -4  -5   11.50    4.90
 -15  -4   5   26.40    5.80
   0  -5  -5    1.90    1.00
   0   5   5    2.20    1.10
   0  -5   5   -0.50    1.00
   0  -5   5    2.00    0.80
   0   5  -5    0.10    1.10
   0   5  -5    1.60    0.80
   0  -5  -5    1.40    0.80
  -1  -5  -5    5.30    1.00
   1  -5   5    3.50    0.90
   1  -5   5    5.40    1.00
   1   5  -5    5.20    1.40
  -1  -5  -5    5.40    1.20
  -1   5   5    4.40    1.20
   1   5  -5    6.10    1.00
  -1  -5   5    4.50    1.30
   1  -5  -5    4.10    1.10
  -1   5  -5    5.00    1.00
   1  -5  -5    3.70    0.90
  -1   5  -5    3.50    0.90
  -2  -5  -5    0.80    0.80
  -2   5   5    0.50    1.00
   2  -5   5    0.80    0.90
  -2  -5  -5   -0.10    1.00
   2   5  -5    1.20    0.90
   2  -5   5   -0.40    0.60
   2  -5  -5    0.60    0.80
  -2  -5   5   -0.20    0.60
  -2   5  -5    1.40    0.60
   2  -5  -5    0.40    0.90
  -2  -5   5   -1.30    1.30
   3  -5   5  543.35   13.50
   3   5  -5  538.35   13.70
  -3   5   5  547.95   13.90
  -3  -5  -5  529.65   13.60
  -3  -5   5  551.24   14.00
  -3  -5   5  554.94   13.70
   3  -5  -5  549.45   13.80
   4   5  -5   64.19    3.00
  -4   5   5   62.09    2.90
  -4  -5  -5   63.49    2.90
   4  -5   5   59.59    2.80
  -4  -5  -5   64.99    2.70
  -4  -5   5   59.69    3.30
  -4  -5   5   59.09    3.00
   4  -5  -5   59.19    2.80
  -5   5   5  135.69    5.30
   5   5  -5  133.39    4.90
  -5  -5  -5  143.49    4.80
  -5  -5  -5  134.49    4.60
  -5  -5   5  143.49    4.90
  -5  -5   5  134.39    5.20
  -6  -5  -5   91.29    4.00
  -6  -5  -5   93.79    3.80
  -6   5   5   86.69    3.90
   6   5  -5   82.29    4.20
   6  -5  -5   89.49    4.30
  -6  -5   5   86.59    4.20
  -7  -5  -5    6.10    1.90
  -7   5   5    7.80    2.00
   7   5  -5    8.00    2.40
  -7  -5  -5    6.10    1.80
   7  -5  -5    3.50    2.20
  -7  -5   5    4.60    2.10
  -7  -5   5    6.20    2.10
  -8   5   5   83.49    4.40
  -8  -5  -5   80.89    4.30
  -8  -5  -5   77.19    4.50
   8   5  -5   76.69    5.30
  -8  -5   5   77.59    4.80
  -9   5   5   61.99    4.30
  -9  -5  -5   64.19    4.90
  -9  -5  -5   68.79    4.30
  -9  -5   5   62.29    5.20
  -9  -5   5   65.89    4.80
 -10  -5  -5    2.10    3.20
 -10  -5  -5    7.90    2.50
 -10   5   5    3.30    2.70
 -10  -5   5    7.00    3.10
 -10  -5   5    2.60    2.90
 -11   5   5    6.20    3.10
 -11  -5  -5   10.40    3.70
 -11  -5  -5    3.20    3.80
 -11  -5   5   10.20    3.30
 -12   5   5   -0.70    3.50
 -12  -5  -5   -4.00    4.20
 -12  -5  -5    2.20    3.00
 -12  -5   5    4.90    3.50
 -13  -5  -5   35.30    4.40
 -13  -5  -5   43.50    5.90
 -13  -5   5   43.60    5.00
 -14  -5  -5    5.40    5.20
 -14  -5  -5    3.90    4.10
 -14  -5   5   -2.70    4.10
   0   6  -5   -0.40    0.90
   0  -6  -5    1.60    1.00
   0  -6   5   -0.10    1.10
   0  -6  -5   -0.50    0.80
   0   6  -5   -0.50    0.90
  -1  -6  -5  295.17    8.40
   1   6  -5  299.67    8.20
  -1   6   5  309.77    8.30
   1  -6   5  308.77    7.80
  -1  -6  -5  300.67    8.30
  -1   6  -5  303.27    7.70
   1  -6  -5  306.67    8.10
  -1  -6   5  299.17    8.30
   1  -6  -5  311.87    8.30
  -1   6  -5  306.37    8.00
   2  -6   5  150.28    3.90
  -2  -6  -5  151.88    4.50
  -2   6   5  149.19    4.70
  -2  -6  -5  149.39    4.70
   2   6  -5  139.99    4.60
  -2  -6   5  144.19    4.90
   2  -6  -5  144.59    4.60
  -2  -6   5  126.39    4.50
   2  -6  -5  143.29    4.60
  -2   6  -5  144.09    3.80
   3   6  -5   20.50    2.20
  -3  -6  -5   24.20    2.10
  -3   6   5   23.90    2.00
  -3  -6  -5   24.40    2.00
  -3  -6   5   25.10    2.30
   3  -6  -5   23.80    2.00
  -3  -6   5   24.60    2.70
  -4  -6  -5    5.70    1.20
  -4   6   5    8.40    1.50
  -4  -6  -5    4.80    1.30
   4   6  -5    7.50    1.70
   4  -6  -5    7.20    1.30
  -4  -6   5    6.90    1.40
  -4  -6   5    5.90    1.60
  -5  -6  -5    0.70    1.20
  -5  -6  -5    1.50    1.40
  -5   6   5    0.70    1.30
   5   6  -5   -2.10    1.50
  -5  -6   5    0.70    1.50
  -5  -6   5   -0.30    1.50
   5  -6  -5    0.90    1.10
   6   6  -5   24.80    2.70
  -6  -6  -5   25.90    2.60
  -6   6   5   25.10    2.70
  -6  -6  -5   26.90    2.70
   6  -6  -5   24.10    2.40
  -6  -6   5   20.70    2.50
  -6  -6   5   25.40    2.80
  -7  -6  -5  157.88    5.70
  -7  -6  -5  158.58    6.00
   7   6  -5  147.39    6.30
  -7   6   5  156.18    5.80
   7  -6  -5  158.08    6.40
  -7  -6   5  161.88    6.40
  -7  -6   5  164.08    6.20
  -8  -6  -5  175.68    6.40
  -8   6   5  172.98    6.30
  -8  -6  -5  175.08    6.60
  -8  -6   5  165.38    6.90
  -8  -6   5  172.48    6.70
  -9   6   5   -0.20    2.30
  -9  -6  -5    0.90    2.00
  -9  -6  -5   -3.20    2.50
  -9  -6   5   -1.60    2.40
  -9  -6   5   -2.20    2.70
 -10  -6  -5   57.19    5.50
 -10  -6  -5   62.29    4.60
 -10   6   5   55.69    4.70
 -11   6   5   22.70    3.70
 -11  -6  -5   21.20    7.40
 -11  -6  -5   28.50    3.50
 -11  -6   5   33.80    4.50
 -12  -6  -5    4.20    4.50
 -12  -6  -5    5.30    3.00
 -12   6   5    4.90    3.80
 -12  -6   5   14.30    4.00
 -13  -6  -5   -1.30    4.60
 -13  -6  -5   -1.70    3.40
 -13  -6   5    0.30    3.80
 -14  -6  -5   -3.50    4.00
 -14  -6  -5   -3.10    5.40
 -14  -6   5    2.70    4.60
   0  -7  -5   -0.50    0.90
   0  -7   5    0.20    0.90
   0   7  -5    0.80    1.00
   0  -7  -5   -1.70    1.00
   0  -7   5   -0.30    1.10
  -1  -7  -5  356.26    9.50
   1  -7   5  351.86    9.00
   1   7  -5  348.77    9.30
  -1  -7  -5  361.26    9.30
  -1   7  -5  339.27    9.30
   1  -7  -5  363.46    9.30
  -1   7  -5  344.27    8.80
  -1  -7   5  356.56    9.50
  -1  -7   5  346.47    9.30
   1  -7  -5  328.57    9.90
  -2  -7  -5   41.90    2.50
   2   7  -5   42.10    2.60
   2  -7   5   43.40    2.00
  -2  -7  -5   47.70    2.60
  -2   7  -5   39.50    2.90
  -2  -7   5   43.40    3.10
  -2   7  -5   44.20    1.80
   2  -7  -5   44.70    2.50
  -2  -7   5   39.90    2.50
  -3   7   5   21.90    2.80
  -3  -7  -5   24.90    2.30
   3   7  -5   24.50    2.40
  -3  -7  -5   29.00    2.20
   3  -7   5   27.40    1.30
  -3  -7   5   24.30    3.00
   3  -7  -5   24.10    2.40
   3  -7  -5   26.30    2.20
  -3  -7   5   25.50    2.50
  -4  -7  -5   32.00    2.50
  -4   7   5   32.30    2.50
   4   7  -5   29.60    2.90
  -4  -7  -5   31.30    2.40
   4  -7  -5   35.80    2.30
  -4  -7   5   29.00    3.20
  -4  -7   5   27.70    2.70
   4  -7  -5   30.60    2.50
   5   7  -5    4.70    2.00
   5  -7   5    1.50    1.30
  -5  -7  -5    3.20    1.30
  -5  -7  -5    3.30    1.60
  -5   7   5    3.40    1.50
   5  -7  -5    3.60    1.40
  -5  -7   5    3.00    2.00
  -5  -7   5    5.00    1.90
   6   7  -5   21.10    2.60
  -6  -7  -5   24.20    2.90
  -6   7   5   21.30    2.70
  -6  -7  -5   23.80    2.70
   6  -7   5   25.70    2.50
  -6  -7   5   24.50    2.90
   6  -7  -5   25.80    2.50
  -6  -7   5   20.40    2.40
  -7   7   5   -0.50    1.80
   7   7  -5    0.50    2.60
  -7  -7  -5    1.10    1.80
  -7  -7  -5    1.50    2.10
  -7  -7   5    0.60    2.20
  -7  -7   5    1.70    2.20
   7  -7  -5    2.20    1.50
  -8  -7  -5    3.50    2.50
  -8   7   5    4.70    2.20
  -8  -7  -5    1.40    2.00
  -8  -7   5    1.80    2.50
   8  -7  -5    1.60    1.90
  -8  -7   5    4.30    2.40
  -9  -7  -5   -3.30    2.60
  -9  -7  -5    2.70    2.20
  -9   7   5    1.40    2.20
  -9  -7   5    1.10    3.20
   9  -7  -5    0.90    1.90
  -9  -7   5    2.70    2.70
 -10   7   5    8.60    2.90
 -10  -7  -5    6.90    3.40
 -10  -7  -5    5.30    2.50
 -10  -7   5    7.80    3.00
  10  -7  -5   12.50    2.60
 -11   7   5   18.70    3.70
 -11  -7  -5   25.80    3.60
 -11  -7  -5   20.50    4.30
 -11  -7   5   41.20    5.20
 -12  -7  -5    0.90    3.20
 -12  -7  -5   -2.30    4.10
 -12  -7   5    5.30    4.10
 -13  -7  -5    4.00    5.00
 -13  -7  -5    7.00    3.70
 -13  -7   5    6.10    4.10
 -14  -7  -5   39.30    5.30
 -14  -7  -5   40.30    7.00
 -14  -7   5   30.60    5.70
   0  -8  -5    0.30    1.10
   0  -8   5    0.60    1.10
   0  -8  -5    0.70    1.00
   0  -8   5   -1.00    1.30
   0   8  -5    0.60    1.20
   1  -8   5  115.09    4.00
   1  -8   5  114.29    4.20
   1   8  -5  112.69    4.20
  -1  -8  -5  110.39    4.10
  -1  -8  -5  111.09    4.10
  -1   8  -5  109.69    4.10
  -1  -8   5  110.39    4.20
  -1  -8   5  113.09    4.30
   1  -8  -5  110.29    4.10
   1  -8  -5  117.59    4.10
  -1   8  -5  107.59    3.60
  -2  -8  -5   61.79    3.00
   2  -8   5   57.59    2.60
   2   8  -5   65.69    3.30
   2  -8   5   59.59    3.10
  -2  -8  -5   57.39    3.00
  -2  -8   5   63.19    3.60
   2  -8  -5   59.59    3.00
   2  -8  -5   63.39    3.00
  -2  -8   5   58.09    3.10
  -2   8  -5   56.99    2.30
  -2   8  -5   58.89    3.00
   3  -8   5    9.10    1.60
   3   8  -5    6.60    1.70
  -3  -8  -5    7.80    1.50
   3  -8   5    7.50    1.10
  -3  -8  -5    9.70    1.60
  -3   8   5    7.10    1.50
   3  -8  -5    8.30    1.50
  -3   8  -5    9.60    1.00
   3  -8  -5    9.90    1.70
  -3  -8   5    9.60    1.90
  -3  -8   5    7.70    2.00
  -4   8   5   51.19    3.10
   4  -8   5   46.80    3.00
  -4  -8  -5   54.09    3.10
   4   8  -5   52.89    3.40
  -4  -8  -5   51.89    3.00
  -4  -8   5   53.69    3.50
  -4  -8   5   51.79    3.90
   4  -8  -5   49.99    2.90
   4  -8  -5   50.09    3.10
  -5  -8  -5  111.69    4.70
  -5  -8  -5  115.19    4.50
   5  -8   5  105.19    4.50
   5   8  -5  115.99    5.20
  -5   8   5  107.19    4.50
   5  -8  -5  109.89    4.30
  -5  -8   5  116.99    5.00
   5  -8  -5  103.19    4.50
  -5  -8   5  112.79    5.30
  -6   8   5  141.89    5.40
  -6  -8  -5  147.79    5.70
   6   8  -5  132.99    6.10
  -6  -8  -5  135.79    5.40
   6  -8   5  148.49    5.50
   6  -8  -5  150.18    5.60
   6  -8  -5  149.79    5.30
  -6  -8   5  145.99    6.30
  -6  -8   5  145.89    6.00
  -7  -8  -5   19.60    2.80
  -7  -8  -5   21.60    2.60
  -7   8   5   17.60    2.50
  -7  -8   5   21.50    3.10
   7  -8  -5   19.00    2.20
  -7  -8   5   15.60    3.00
  -8  -8  -5   16.10    2.60
  -8  -8  -5    9.00    2.70
  -8   8   5   11.10    2.40
   8  -8  -5   13.10    2.20
  -8  -8   5   17.70    3.30
  -8  -8   5    9.00    2.90
  -9  -8  -5   28.40    3.80
  -9  -8  -5   32.40    3.40
  -9   8   5   28.10    3.30
   9  -8  -5   28.50    3.40
  -9  -8   5   31.60    6.20
 -10   8   5    9.30    3.00
 -10  -8  -5    4.60    3.40
 -10  -8  -5    4.00    3.70
  10  -8  -5    6.40    2.50
 -10  -8   5    6.90    3.30
 -11  -8  -5    3.20    2.80
 -11  -8  -5    1.10    3.70
 -11  -8   5    4.60    3.30
 -12  -8  -5   -2.10    4.50
 -12  -8  -5   -0.80    3.40
 -12  -8   5   17.30    4.10
 -13  -8  -5    7.20    3.90
 -13  -8  -5    1.40    5.30
 -13  -8   5   15.50    4.90
 -14  -8  -5   15.90    6.30
 -14  -8  -5   15.40    5.00
   0   9  -5   -2.20    1.30
   0  -9  -5    1.30    1.30
   0  -9  -5    0.40    1.30
   0  -9   5   -0.70    1.60
   0  -9   5   -0.40    1.30
   1  -9   5    0.80    1.50
   1  -9   5    1.30    1.40
   1   9  -5   -0.70    1.40
  -1  -9  -5    1.90    1.20
  -1  -9  -5   -1.50    1.20
   1  -9  -5    0.20    1.20
  -1   9  -5   -0.30    1.50
   1  -9  -5   -0.30    1.20
  -1  -9   5    1.00    1.80
  -1  -9   5    2.80    1.50
   2  -9   5  160.68    5.50
  -2  -9  -5  163.68    5.50
   2   9  -5  157.78    5.70
  -2  -9  -5  167.48    5.40
   2  -9   5  155.48    5.00
  -2   9  -5  149.88    4.60
   2  -9  -5  165.18    5.50
   2  -9  -5  159.18    5.30
  -2  -9   5  154.88    5.60
  -2   9  -5  154.78    5.40
  -2  -9   5  165.68    6.00
   3  -9   5  159.38    5.50
   3   9  -5  158.38    5.80
   3  -9   5  146.09    4.50
  -3  -9  -5  155.98    5.40
   3  -9   5  155.28    4.40
  -3  -9  -5  153.78    5.40
   3  -9  -5  158.68    5.20
  -3   9  -5  158.58    4.40
  -3  -9   5  157.28    5.70
   3  -9  -5  159.38    5.50
  -3  -9   5  154.68    6.10
  -4  -9  -5   43.80    3.20
  -4   9   5   42.90    2.90
  -4  -9  -5   48.30    3.20
   4   9  -5   43.70    4.00
   4  -9   5   43.50    3.30
   4  -9  -5   46.00    2.90
   4  -9  -5   48.10    3.20
  -4  -9   5   52.09    3.80
  -4  -9   5   50.69    4.20
  -5   9   5    1.50    1.70
   5  -9   5    5.80    2.10
   5   9  -5    2.80    2.10
  -5  -9  -5   -0.90    1.60
  -5  -9  -5    3.60    2.00
  -5  -9   5   -0.70    2.50
   5  -9  -5    2.40    1.70
   5  -9  -5    2.10    1.50
  -5  -9   5    2.20    2.00
  -6   9   5  136.99    5.40
  -6  -9  -5  139.59    5.70
  -6  -9  -5  131.79    5.40
   6  -9   5  127.99    5.90
   6  -9  -5  132.09    5.00
   6  -9  -5  131.09    5.50
  -6  -9   5  132.89    6.00
  -6  -9   5  135.69    6.40
  -7  -9  -5   34.20    3.30
  -7   9   5   33.80    3.40
  -7  -9  -5   39.50    4.00
   7  -9  -5   37.60    3.30
   7  -9  -5   41.50    3.90
  -7  -9   5   36.60    3.70
  -7  -9   5   44.90    4.60
  -8  -9  -5  121.79    6.00
  -8   9   5  116.59    5.40
  -8  -9  -5  111.79    6.00
   8  -9  -5  118.69    5.10
  -8  -9   5  119.49    6.30
  -9  -9  -5   40.60    3.80
  -9  -9  -5   41.00    5.30
  -9   9   5   43.80    4.40
  -9  -9   5   47.60    5.20
   9  -9  -5   42.50    4.00
 -10  -9  -5    9.40    3.80
 -10  -9  -5   16.00    3.30
 -10   9   5   14.30    3.50
 -10  -9   5   20.30    3.60
  10  -9  -5   14.80    3.00
 -11  -9  -5    4.60    3.10
 -11  -9  -5   -5.20    3.80
 -11  -9   5    7.70    3.60
 -12  -9  -5    5.80    5.00
 -12  -9  -5    3.90    3.70
 -12  -9   5   14.20    4.10
 -13  -9  -5    7.10    4.30
 -13  -9  -5   -0.70    5.40
 -13  -9   5   11.80    5.10
   0 -10  -5   -1.10    1.40
   0 -10   5    0.40    1.60
   0  10  -5    1.20    1.90
   0 -10  -5    0.20    1.30
  -1 -10  -5  132.09    4.90
   1  10  -5  126.19    5.20
   1 -10   5  129.59    5.10
   1 -10   5  134.39    5.10
  -1 -10  -5  135.29    4.90
   1 -10  -5  126.99    5.00
  -1 -10   5  136.69    5.20
  -1 -10   5  126.79    5.40
  -1  10  -5  126.39    5.10
   1 -10  -5  134.69    4.90
   2  10  -5   81.69    4.50
  -2 -10  -5   78.29    3.90
  -2 -10  -5   87.49    3.90
   2 -10   5   81.29    3.80
   2 -10   5   77.19    4.10
  -2  10  -5   82.99    4.10
   2 -10  -5   85.09    4.10
  -2 -10   5   81.29    4.20
  -2 -10   5   79.49    4.70
   2 -10  -5   83.89    3.80
   3 -10   5   24.20    2.60
  -3 -10  -5   26.40    2.60
   3  10  -5   27.90    2.90
  -3 -10  -5   24.20    2.80
   3 -10   5   27.50    2.20
   3 -10   5   28.00    3.20
  -3 -10   5   27.40    3.20
   3 -10  -5   21.90    2.60
  -3 -10   5   28.50    3.00
  -3  10  -5   20.20    2.10
   3 -10  -5   25.80    3.00
  -4 -10  -5   20.30    2.50
  -4 -10  -5   18.10    2.40
   4  10  -5   12.00    2.70
   4 -10   5   15.60    1.40
   4 -10   5   12.20    2.20
  -4 -10   5   17.30    3.10
   4 -10  -5   21.00    2.60
  -4 -10   5   14.10    2.40
   4 -10  -5   12.40    2.10
  -4  10  -5   16.80    2.00
  -5 -10  -5   33.00    3.40
   5 -10   5   32.50    3.70
  -5 -10  -5   37.90    3.50
  -5  10   5   35.20    3.20
  -5 -10   5   39.30    4.60
  -5 -10   5   35.50    3.60
   5 -10  -5   41.40    3.70
   5 -10  -5   38.30    3.10
  -6  10   5    0.80    2.00
  -6 -10  -5    0.90    2.20
  -6 -10  -5    0.40    1.70
   6 -10  -5    0.40    2.00
  -6 -10   5   -0.50    2.70
  -6 -10   5    0.50    2.50
   6 -10  -5    3.50    1.80
  -7 -10  -5  133.09    6.20
  -7  10   5  129.89    5.50
  -7 -10  -5  131.69    6.00
  -7 -10   5  132.49    7.70
   7 -10  -5  135.69    5.50
  -7 -10   5  134.89    6.70
   7 -10  -5  136.19    6.10
  -8 -10  -5  109.69    6.10
  -8  10   5  111.59    5.60
  -8 -10  -5  103.39    5.70
   8 -10  -5  116.89    6.00
  -8 -10   5  115.89    6.40
   8 -10  -5  119.59    5.20
  -9 -10  -5   34.10    4.50
  -9  10   5   38.60    4.50
  -9 -10  -5   28.40    4.10
   9 -10  -5   31.20    3.70
  -9 -10   5   38.20    4.40
   9 -10  -5   31.40    3.20
 -10 -10  -5   16.20    4.20
 -10 -10  -5   11.30    3.30
 -10 -10   5   23.70    4.00
 -11 -10  -5    6.80    3.40
 -11 -10  -5   -2.40    4.20
 -11 -10   5    5.90    3.90
 -12 -10  -5   19.20    5.40
 -12 -10  -5   16.00    4.00
 -12 -10   5   19.60    4.70
 -13 -10  -5    4.90    5.90
 -13 -10  -5    7.30    4.50
   0 -11   5    1.30    1.80
   0 -11  -5    1.20    1.70
   0 -11  -5   -1.10    1.50
   0 -11   5    0.60    2.20
   0  11  -5    0.60    2.10
   1 -11   5   24.10    2.60
  -1 -11  -5   21.60    2.40
   1  11  -5   34.30    3.60
   1 -11   5   25.60    2.70
  -1 -11  -5   20.30    2.40
  -1 -11   5   25.20    3.00
  -1  11  -5   23.90    2.70
   1 -11  -5   27.60    2.60
   1 -11  -5   23.80    2.90
  -1 -11   5   22.00    2.50
   2 -11   5  117.19    5.30
   2 -11   5  120.09    4.90
  -2 -11  -5  112.49    5.00
   2  11  -5  121.09    6.90
  -2 -11  -5  124.09    5.10
   2 -11  -5  120.79    4.80
   2 -11  -5  115.19    5.10
  -2 -11   5  122.19    5.30
  -2 -11   5  116.09    5.60
  -2  11  -5  115.89    6.50
  -3 -11  -5    1.40    1.70
   3 -11   5    0.10    1.90
  -3 -11  -5    1.90    1.90
   3 -11   5   -1.10    2.10
   3 -11  -5    0.60    1.80
  -3 -11   5    3.00    2.60
  -3 -11   5    0.40    2.20
   3 -11  -5    0.50    1.70
  -4 -11  -5    3.80    2.10
  -4 -11  -5    2.80    2.00
   4 -11   5    2.10    1.50
   4 -11  -5    1.30    1.80
  -4 -11   5    3.90    2.50
   4 -11  -5    3.20    2.00
  -4 -11   5    4.10    2.90
  -5 -11  -5   26.40    2.90
  -5 -11  -5   22.40    2.80
  -5 -11   5   23.00    3.30
   5 -11  -5   20.70    2.40
   5 -11  -5   22.60    2.80
  -5 -11   5   22.90    3.50
  -6 -11  -5   23.20    3.30
  -6 -11  -5   23.60    2.80
  -6  11   5   20.80    2.70
   6 -11  -5   21.20    2.50
  -6 -11   5   23.50    3.80
   6 -11  -5   23.80    3.00
  -7 -11  -5   26.80    3.50
  -7 -11  -5   24.30    3.10
  -7  11   5   30.60    3.20
   7 -11  -5   30.30    3.60
  -7 -11   5   26.90    6.50
   7 -11  -5   26.30    3.20
  -8  11   5    0.90    2.60
  -8 -11  -5    4.10    2.90
  -8 -11  -5   -0.30    2.90
   8 -11  -5    0.70    2.30
   8 -11  -5    0.90    2.60
  -8 -11   5    5.40    3.30
  -9 -11  -5   28.70    3.90
  -9 -11  -5   26.40    4.30
   9 -11  -5   19.60    3.80
  -9 -11   5   33.20    4.40
 -10 -11  -5   -3.60    3.80
 -10 -11  -5   -3.30    3.20
 -10 -11   5    3.30    3.60
 -11 -11  -5   12.90    3.80
 -11 -11  -5    7.70    4.60
 -11 -11   5   17.50    4.20
 -12 -11  -5   -0.20    5.20
 -12 -11  -5   -0.60    4.10
 -12 -11   5   10.10    4.70
   0 -12  -5    0.30    1.80
   0 -12  -5   -0.90    1.80
   0 -12   5   -0.60    2.00
   0 -12   5    0.20    2.30
   1 -12   5   15.20    2.70
  -1 -12  -5   19.10    2.50
   1 -12   5   18.40    2.70
  -1 -12  -5   13.60    2.30
  -1 -12   5   17.60    3.10
   1 -12  -5   18.20    2.40
   1 -12  -5   17.80    2.50
  -1 -12   5   21.00    2.90
  -2 -12  -5   29.40    3.30
   2 -12   5   38.10    3.90
  -2 -12  -5   29.60    3.50
  -2 -12   5   34.70    3.40
   2 -12  -5   31.50    3.70
  -2 -12   5   32.70    3.60
   2 -12  -5   28.60    3.00
  -3 -12  -5   12.80    2.30
  -3 -12  -5   13.70    2.50
   3 -12   5   12.00    2.30
   3 -12  -5    8.80    2.40
  -3 -12   5    9.90    3.10
   3 -12  -5    8.60    2.10
  -3 -12   5    8.20    2.70
  -4 -12  -5   15.60    2.80
  -4 -12  -5   18.70    2.70
   4 -12  -5   19.50    2.50
  -4 -12   5   19.20    3.40
   4 -12  -5   16.20    2.60
  -5 -12  -5   66.49    4.60
  -5 -12  -5   71.79    4.70
   5 -12  -5   68.49    4.80
  -5 -12   5   74.19    5.90
   5 -12  -5   68.99    4.10
  -6 -12  -5    4.90    2.40
  -6 -12  -5    3.30    2.70
   6 -12  -5    3.80    2.70
   6 -12  -5    3.20    2.20
  -6 -12   5    5.80    3.70
  -7 -12  -5   14.10    3.10
  -7 -12  -5   14.80    3.30
  -7 -12   5   17.20    3.80
   7 -12  -5   15.80    2.70
   7 -12  -5   16.90    3.10
  -8 -12  -5   20.80    3.90
  -8 -12  -5   21.80    3.50
   8 -12  -5   26.20    3.70
  -8 -12   5   27.10    4.30
  -9 -12  -5   -0.30    3.40
  -9 -12  -5   -1.10    3.10
   9 -12  -5    2.30    3.70
 -10 -12  -5    8.10    3.70
 -10 -12  -5   -2.40    4.20
 -10 -12   5   13.30    4.00
 -11 -12  -5   13.80    4.20
 -11 -12  -5    2.20    4.70
 -12 -12  -5   22.00    5.10
   0 -13  -5    2.30    2.10
   0 -13   5   -4.00    2.50
   0 -13  -5   -0.60    1.90
  -1 -13  -5    3.70    2.20
  -1 -13  -5    2.50    2.10
   1 -13   5    4.70    2.50
  -1 -13   5    4.40    2.90
   1 -13  -5    5.20    2.30
   1 -13  -5    4.50    2.20
  -2 -13  -5   34.30    3.30
  -2 -13  -5   37.90    3.70
   2 -13   5   35.30    4.00
   2 -13  -5   45.50    4.30
   2 -13  -5   36.50    3.40
  -2 -13   5   42.20    4.10
  -3 -13  -5   72.59    4.60
  -3 -13  -5   73.79    4.90
   3 -13  -5   73.99    5.00
  -3 -13   5   77.39    5.50
   3 -13  -5   76.99    4.30
  -4 -13  -5   27.10    3.40
  -4 -13  -5   21.20    3.80
   4 -13  -5   25.70    2.90
  -4 -13   5   22.40    3.90
   4 -13  -5   26.60    3.20
  -5 -13  -5    1.60    2.20
  -5 -13  -5   -2.30    2.50
   5 -13  -5   -3.00    2.00
  -5 -13   5    4.40    3.40
   5 -13  -5    0.80    2.30
  -6 -13  -5   -2.60    2.50
  -6 -13  -5    1.30    2.90
   6 -13  -5    1.20    2.20
  -6 -13   5    6.50    3.50
   6 -13  -5    1.70    2.70
  -7 -13  -5   13.90    3.30
  -7 -13  -5   15.20    3.70
   7 -13  -5   20.60    3.30
   7 -13  -5   18.70    3.60
  -7 -13   5   14.60    3.90
  -8 -13  -5   21.50    4.00
  -8 -13  -5   19.70    4.30
   8 -13  -5   24.50    4.10
  -8 -13   5   20.50    4.10
  -9 -13  -5   15.20    3.80
  -9 -13  -5    5.10    4.10
  -9 -13   5   21.90    4.40
 -10 -13  -5   -0.40    4.60
 -10 -13  -5   12.80    4.10
 -10 -13   5   12.40    4.30
 -11 -13  -5   -7.00    5.10
 -11 -13  -5   -3.70    4.10
   0 -14   5   -0.20    2.90
   0 -14  -5   -2.30    2.30
   0 -14  -5   -0.60    2.20
  -1 -14  -5   12.40    2.80
  -1 -14  -5    7.50    2.40
   1 -14   5    7.50    3.00
  -1 -14   5   10.80    3.30
   1 -14  -5    9.20    2.60
   1 -14  -5    6.30    2.50
  -2 -14  -5   20.90    3.10
  -2 -14  -5   24.30    3.20
   2 -14   5   20.90    3.70
   2 -14  -5   20.60    3.10
  -2 -14   5   25.40    4.00
   2 -14  -5   21.90    2.90
  -3 -14  -5   16.40    3.40
  -3 -14  -5   16.60    2.90
   3 -14  -5   15.10    3.20
  -3 -14   5   20.00    3.90
   3 -14  -5   22.00    2.80
  -4 -14  -5   -1.00    2.60
  -4 -14  -5    0.50    2.60
  -4 -14   5    4.00    3.50
   4 -14  -5    0.40    2.80
   4 -14  -5    4.30    2.40
  -5 -14  -5    3.70    2.60
  -5 -14  -5   -0.80    2.90
  -5 -14   5    5.90    3.60
   5 -14  -5    2.70    2.60
   5 -14  -5   -1.00    2.90
  -6 -14  -5   31.10    4.10
  -6 -14  -5   25.90    3.70
  -6 -14   5   34.90    4.80
   6 -14  -5   32.70    4.30
   6 -14  -5   38.10    4.30
  -7 -14  -5   35.00    4.00
  -7 -14  -5   38.30    4.70
  -7 -14   5   41.90    5.30
   7 -14  -5   53.39    5.90
  -8 -14  -5    0.40    3.50
  -8 -14   5    2.80    4.10
  -9 -14  -5   26.20    4.40
  -9 -14  -5   12.80    4.40
  -9 -14   5   22.20    4.80
 -10 -14  -5   -7.30    4.60
 -10 -14  -5   17.30    5.20
 -10 -14   5    7.40    4.60
   0 -15  -5    0.80    2.60
   0 -15   5    1.00    3.30
   0 -15  -5   -2.20    2.20
  -1 -15  -5   17.00    3.10
   1 -15   5   19.00    3.60
   1 -15  -5   12.80    2.80
   1 -15  -5   19.10    3.40
  -1 -15   5   17.50    3.90
  -2 -15  -5    9.20    2.90
  -2 -15  -5    1.50    2.70
   2 -15  -5    6.90    2.60
  -2 -15   5    9.50    3.80
   2 -15  -5    9.20    3.10
  -3 -15  -5   20.40    3.40
  -3 -15  -5   23.60    3.60
   3 -15  -5   23.50    3.70
  -3 -15   5   24.70    4.10
   3 -15  -5   21.90    3.30
  -4 -15  -5    3.10    2.90
   4 -15  -5    8.40    3.40
  -4 -15   5    3.60    3.80
   4 -15  -5    5.30    2.60
  -5 -15  -5    0.80    3.20
  -5 -15  -5    6.80    3.00
   5 -15  -5   10.50    2.90
   5 -15  -5    6.70    3.60
  -5 -15   5    8.90    4.30
  -6 -15  -5   -4.40    3.00
  -6 -15  -5   -1.00    3.60
   6 -15  -5    6.30    3.70
  -6 -15   5    5.40    4.20
  -7 -15  -5   25.30    4.60
  -7 -15  -5   29.10    4.00
  -7 -15   5   26.70    5.10
  -8 -15  -5   18.60    4.80
  -8 -15  -5   24.60    4.70
  -8 -15   5   32.50    5.40
  -9 -15  -5    0.10    4.30
  -9 -15  -5   12.70    4.70
  -9 -15   5   12.30    5.00
   0 -16  -5   -3.70    2.90
   0 -16   5    1.40    3.70
   0 -16  -5   -2.80    2.70
  -1 -16  -5    6.00    3.80
  -1 -16  -5    5.60    3.10
   1 -16  -5    9.30    3.40
   1 -16  -5    3.30    3.20
  -1 -16   5    2.50    4.00
  -2 -16  -5   12.90    4.70
  -2 -16  -5    5.50    3.20
  -2 -16   5    6.60    4.20
   2 -16  -5   10.00    3.10
   2 -16  -5   11.70    3.30
  -3 -16  -5    1.50    3.20
  -3 -16  -5    2.80    3.20
   3 -16  -5   -0.10    3.20
   3 -16  -5    1.40    2.80
  -3 -16   5    4.00    4.00
  -4 -16  -5   -0.20    3.40
  -4 -16  -5    3.30    3.40
   4 -16  -5    1.20    2.90
  -4 -16   5   -0.10    4.00
   4 -16  -5   -1.90    3.80
  -5 -16  -5   55.49    6.30
  -5 -16  -5   66.09    6.30
  -5 -16   5   68.59    7.80
  -6 -16  -5   12.60    4.40
  -6 -16  -5   15.40    4.20
  -6 -16   5   16.90    4.90
  -7 -16  -5   15.30    4.30
  -7 -16  -5   -4.40    4.10
  -7 -16   5    3.70    4.40
  -8 -16  -5    3.10    4.70
  -8 -16  -5    4.20    4.80
  -8 -16   5    7.50    4.70
   0 -17  -5   -0.30    3.20
   0 -17  -5    0.20    3.40
  -1 -17  -5   -0.80    3.40
  -1 -17  -5   -2.90    3.40
   1 -17  -5    1.80    3.50
  -1 -17   5    1.00    4.10
   1 -17  -5    4.00    3.30
  -2 -17  -5    9.00    3.90
  -2 -17  -5    8.30    3.70
  -2 -17   5    9.40    4.60
   2 -17  -5   11.00    3.40
   2 -17  -5   12.00    3.80
  -3 -17  -5   34.80    4.70
  -3 -17  -5   19.20    4.30
  -3 -17   5   29.70    5.30
   3 -17  -5   22.30    3.80
   3 -17  -5   21.90    4.30
  -4 -17  -5    7.20    3.90
  -4 -17  -5    5.00    4.20
  -4 -17   5   15.10    5.10
  -5 -17  -5    3.70    4.30
  -5 -17  -5   12.80    3.90
  -5 -17   5    8.90    5.30
  -6 -17  -5   -4.90    4.20
  -6 -17  -5    5.80    4.40
  -6 -17   5    5.90    4.90
  -7 -17  -5   10.60    4.50
  -7 -17  -5  -11.50    5.20
  -7 -17   5    2.80    5.30
   0 -18  -5    4.80    3.80
   0 -18  -5    0.50    3.80
  -1 -18  -5   25.40    4.40
  -1 -18  -5   29.70    4.70
   1 -18  -5   27.20    4.60
   1 -18  -5   30.40    7.00
  -2 -18  -5   -0.50    4.00
  -2 -18  -5   -2.80    3.90
  -2 -18   5    2.90    5.00
   2 -18  -5    0.30    3.50
  -3 -18  -5    8.30    4.40
  -3 -18  -5    4.30    4.20
  -3 -18   5   14.40    5.40
  -4 -18  -5   17.10    4.60
  -4 -18  -5   25.80    5.10
  -4 -18   5   24.40    6.00
  -5 -18  -5    9.00    4.40
  -5 -18  -5   -3.70    4.60
  -5 -18   5   13.50    5.80
  -6 -18   5   -6.80    5.10
   0 -19  -5   -5.10    4.30
  -1 -19  -5   -5.50    4.30
   1 -19  -5   -1.50    4.20
  -2 -19  -5   -2.00    4.70
  -3 -19  -5    8.50    4.60
  -3 -19   5    4.10    7.00
   0   0  -6  139.89    4.10
   0   0   6  141.09    4.10
  -1   0  -6   27.20    1.30
  -1   0  -6   30.10    1.60
   1   0   6   28.00    1.50
   1   0  -6   26.00    1.60
  -1   0   6   28.20    1.70
   1   0  -6   28.60    1.10
   2   0   6   47.90    2.00
   2   0  -6   50.69    1.90
  -2   0  -6   49.30    1.90
  -2   0   6   51.29    1.80
   2   0   6   47.90    1.50
  -2   0  -6   47.90    2.00
   2   0   6   49.70    2.00
  -3   0   6  111.49    3.40
  -3   0  -6   99.49    3.30
  -3   0  -6  106.79    3.00
   3   0   6  103.19    3.20
   3   0  -6  105.69    3.40
  -3   0  -6  106.09    3.20
  -4   0   6  482.35   12.30
   4   0   6  456.25   11.60
  -4   0  -6  496.35   11.60
  -4   0  -6  440.46   11.60
  -5   0   6  133.99    4.80
   5   0  -6  136.49    4.60
   5   0   6  123.19    4.00
  -5   0   6  132.69    4.50
  -5   0  -6  136.99    4.00
  -5   0  -6  143.69    4.20
  -6   0   6  133.89    5.00
   6   0  -6  132.39    5.00
  -6   0   6  135.39    4.80
  -6   0  -6  139.19    4.20
  -6   0  -6  136.29    4.40
  -7   0  -6   28.50    2.60
   7   0  -6   23.20    2.60
  -7   0  -6   18.80    2.30
  -7   0   6   23.10    2.90
  -7   0   6   22.60    2.40
  -8   0   6   62.69    4.10
   8   0  -6   67.99    4.90
  -8   0  -6   69.19    3.70
  -8   0   6   66.99    4.40
  -8   0  -6   76.29    4.10
  -9   0  -6  232.98    7.80
  -9   0   6  241.28    8.40
  -9   0   6  253.57    8.40
 -10   0   6   44.60    4.40
 -10   0  -6   45.10    4.50
 -11   0   6  129.59    6.70
 -11   0  -6  127.89    6.30
 -13   0   6   83.09    7.00
 -14   0   6   -0.10    4.50
 -15   0   6   80.39    9.30
   0   1   6 1054.39   25.10
   0  -1   6 1062.19   25.10
   0  -1  -6 1005.80   25.20
   0   1  -6 1071.09   24.40
   0  -1  -6 1041.90   24.40
   0  -1   6 1076.39   24.40
   0  -1  -6 1062.09   25.10
   0   1  -6 1044.60   25.00
   1   1  -6  104.39    2.80
  -1  -1  -6   99.59    2.50
   1  -1   6  104.69    3.20
  -1  -1  -6  103.59    3.20
   1   1  -6   96.19    3.20
  -1  -1  -6  100.89    3.30
  -1   1   6  100.09    3.40
  -1   1  -6   98.69    3.10
   1   1   6  103.29    3.20
   1  -1  -6  105.29    2.80
  -1   1  -6  103.89    3.10
   1  -1  -6   93.49    3.40
   1   1   6  101.29    2.50
   1   1   6  106.89    3.30
  -1  -1   6  100.49    3.30
  -1  -1   6  105.39    2.80
  -2  -1  -6  239.88    6.30
  -2  -1  -6  231.38    6.40
  -2  -1  -6  234.38    5.70
  -2   1   6  238.38    6.70
   2  -1   6  232.88    6.10
   2   1  -6  237.08    6.00
   2  -1   6  219.68    5.70
  -2   1  -6  243.18    6.10
  -2  -1   6  232.68    6.60
   2   1   6  239.28    6.30
   2   1   6  244.18    6.30
   2  -1  -6  244.68    6.10
  -2   1  -6  231.88    6.10
   2   1   6  223.08    5.70
  -2  -1   6  236.88    6.00
   3  -1   6   27.10    1.50
  -3   1   6   22.00    2.10
  -3  -1  -6   29.80    1.70
  -3  -1  -6   24.90    1.40
  -3  -1  -6   27.20    1.80
   3   1  -6   27.50    1.80
  -3  -1   6   24.50    2.20
   3  -1  -6   28.80    1.80
  -3   1  -6   26.40    1.50
   3   1   6   27.10    1.70
  -3   1  -6   28.00    1.40
  -3  -1   6   26.30    1.80
  -4  -1  -6  197.68    5.90
   4  -1   6  215.58    5.70
  -4  -1  -6  226.28    5.90
   4  -1  -6  210.68    6.50
  -4   1  -6  215.68    5.70
   4   1   6  203.68    5.90
  -4  -1   6  222.18    6.60
  -4   1  -6  228.98    5.60
   5   1  -6    3.30    1.30
  -5  -1  -6    2.30    0.90
   5  -1   6    4.30    1.00
  -5  -1  -6    4.00    1.10
  -5   1   6    4.10    1.40
  -5   1  -6    4.50    1.00
  -5  -1   6    3.50    1.40
   5  -1  -6    1.50    1.30
  -5   1  -6    4.60    0.90
  -5  -1   6    3.10    1.30
  -6  -1  -6   65.19    2.90
  -6   1   6   58.79    3.40
   6   1  -6   60.99    3.50
   6  -1   6   59.69    2.50
  -6  -1  -6   61.09    2.70
  -6  -1   6   59.39    3.40
  -6   1  -6   63.09    2.60
   6  -1  -6   61.79    3.40
  -6  -1   6   61.49    3.30
  -7  -1  -6   47.00    2.80
  -7  -1  -6   45.60    2.80
   7   1  -6   44.50    3.70
  -7   1   6   46.10    3.20
  -7  -1   6   45.10    3.40
  -7  -1   6   42.70    3.20
   7  -1  -6   39.00    3.40
  -7   1  -6   48.90    2.90
  -8  -1  -6  261.17    7.70
  -8  -1  -6  267.07    7.80
   8   1  -6  239.88    8.40
  -8   1   6  265.37    8.30
  -8  -1   6  252.27    8.30
  -8   1  -6  257.87    7.70
   8  -1  -6  244.78    8.30
  -8  -1   6  260.67    8.20
  -9  -1  -6   17.60    2.80
  -9   1   6   16.90    2.60
  -9  -1  -6   21.20    2.50
  -9   1  -6   17.90    2.70
  -9  -1   6   12.50    2.80
  -9  -1   6   19.30    2.70
 -10  -1  -6   39.50    4.70
 -10  -1  -6   44.30    4.10
 -10   1   6   42.00    4.40
 -10  -1   6   35.90    3.80
 -10  -1   6   51.99    4.60
 -10   1  -6   44.40    4.30
 -11   1   6   69.09    5.70
 -11  -1  -6   84.39    5.90
 -11  -1   6   84.99    6.00
 -11   1  -6   80.59    5.00
 -12   1   6   52.79    5.90
 -12  -1  -6   64.79    6.20
 -12  -1   6   53.09    5.70
 -13   1   6   23.20    4.70
 -13  -1   6   20.80    4.50
 -14   1   6  164.38    9.30
 -14  -1   6  153.68    8.90
 -15   1   6   59.69    6.90
 -15  -1   6   59.79    6.70
   0  -2  -6  100.99    3.50
   0   2   6  108.69    3.50
   0  -2   6  102.59    3.30
   0   2  -6  100.19    2.70
   0   2   6  102.19    3.40
   0  -2  -6  104.19    3.40
   0  -2  -6   99.99    2.80
   0  -2   6  105.09    2.70
   0   2  -6  102.99    3.30
  -1   2   6  616.74   15.30
   1   2  -6  585.04   15.00
   1  -2   6  634.14   14.40
  -1  -2  -6  616.74   15.10
  -1  -2  -6  615.94   14.50
   1  -2   6  616.14   14.80
   1   2  -6  627.74   14.60
  -1  -2  -6  592.24   15.10
  -1   2  -6  607.74   14.80
  -1  -2   6  606.14   15.10
  -1  -2   6  633.34   14.60
   1   2   6  630.04   15.10
   1   2   6  584.54   15.10
   1  -2  -6  626.84   15.20
   1   2   6  614.74   14.50
  -2  -2  -6    0.00    0.90
  -2   2   6    0.00    1.00
  -2  -2  -6    0.40    0.50
  -2  -2  -6    0.60    0.70
   2   2  -6    0.70    0.60
   2  -2   6    0.90    0.60
   2  -2   6    1.00    0.50
  -2  -2   6   -1.00    1.00
   2   2   6    1.40    0.90
  -2   2  -6    0.70    0.60
  -2  -2   6   -0.30    0.70
  -2   2  -6   -0.20    0.60
  -3  -2  -6   81.99    2.60
  -3  -2  -6   81.29    2.90
  -3   2   6   76.89    3.30
   3   2  -6   80.79    2.90
  -3   2  -6   74.39    2.50
  -3  -2   6   81.59    2.90
   3  -2  -6   81.69    2.90
  -3  -2   6   78.39    3.40
  -3   2  -6   78.99    2.40
  -4  -2  -6  730.83   17.40
   4  -2   6  703.13   17.20
  -4   2   6  705.83   18.10
   4   2  -6  709.43   17.80
  -4  -2  -6  741.23   17.60
  -4   2  -6  713.03   17.20
   4  -2  -6  756.12   17.80
  -4  -2   6  704.43   18.30
  -4   2  -6  749.03   17.10
  -5  -2  -6  124.69    4.00
  -5  -2  -6  125.79    4.00
   5   2  -6  123.79    4.50
  -5   2   6  125.49    4.60
   5  -2   6  122.69    3.60
   5  -2  -6  125.19    4.40
  -5   2  -6  129.19    3.50
  -5   2  -6  118.79    3.60
  -5  -2   6  124.59    4.70
  -5  -2   6  125.29    4.40
  -6  -2  -6   13.00    1.60
   6   2  -6   14.40    2.10
  -6  -2  -6   12.00    1.40
   6  -2   6   14.60    1.50
  -6   2   6   10.60    1.90
  -6  -2   6   13.00    2.00
  -6   2  -6   11.40    1.20
  -6   2  -6   15.20    1.90
  -6  -2   6   14.90    2.00
   6  -2  -6   10.80    1.90
   7   2  -6  144.49    5.70
  -7   2   6  145.19    5.60
   7  -2   6  135.59    4.30
  -7  -2  -6  148.49    5.00
  -7  -2  -6  146.29    4.90
  -7   2  -6  148.29    4.70
   7  -2  -6  147.69    5.70
  -7  -2   6  141.39    5.60
  -7  -2   6  150.08    5.50
  -8  -2  -6  220.68    7.00
  -8   2   6  218.28    7.30
   8   2  -6  208.08    7.70
   8  -2   6  211.78    6.40
  -8  -2  -6  215.48    6.80
  -8   2  -6  224.38    6.60
  -8  -2   6  213.28    7.30
  -8  -2   6  221.28    7.60
   8  -2  -6  200.38    7.60
  -9   2   6   53.99    4.20
  -9  -2  -6   45.30    3.70
  -9  -2  -6   46.30    4.40
  -9  -2   6   41.20    4.40
  -9  -2   6   48.60    4.60
  -9   2  -6   43.20    3.70
 -10  -2  -6    6.40    3.00
 -10  -2  -6    4.70    2.20
 -10   2   6   12.90    2.80
 -10  -2   6    1.50    2.50
 -10   2  -6    5.90    2.40
 -10  -2   6    8.20    2.90
 -11   2   6   32.60    3.80
 -11  -2  -6   32.00    4.20
 -11  -2   6   36.50    4.00
 -12  -2  -6   14.40    3.20
 -12   2   6   20.00    3.90
 -12  -2  -6   15.10    4.00
 -12  -2   6   23.50    3.70
 -13  -2  -6   36.60    5.40
 -13   2   6   37.50    5.30
 -13  -2   6   52.59    6.20
 -14   2   6   71.89    8.50
 -14  -2   6   78.29    8.30
 -15  -2   6   78.89    8.30
   0   3  -6 1540.95   36.50
   0  -3  -6 1561.34   36.50
   0  -3   6 1570.04   36.50
   0  -3   6 1544.15   36.80
   0   3  -6 1528.85   36.80
   0   3   6 1619.34   37.20
   0  -3  -6 1604.14   37.10
   1   3  -6   62.99    2.80
   1  -3   6   71.29    2.20
   1   3  -6   67.49    2.30
  -1  -3  -6   69.59    2.20
  -1   3   6   71.79    2.80
   1  -3   6   63.89    2.30
  -1  -3  -6   71.49    2.70
  -1   3  -6   69.19    2.40
  -1   3  -6   70.19    2.10
   1  -3  -6   66.89    2.80
  -1  -3   6   72.69    2.30
  -1  -3   6   66.09    2.80
   1   3   6   71.89    2.80
   1  -3  -6   69.79    2.30
   2  -3   6 1527.95   35.20
  -2   3   6 1523.05   35.90
  -2  -3  -6 1526.85   35.70
   2  -3   6 1459.55   35.10
  -2  -3  -6 1494.45   35.20
   2   3  -6 1491.45   35.30
  -2  -3   6 1518.35   35.40
  -2   3  -6 1508.05   35.10
  -2  -3   6 1506.35   35.80
   2  -3  -6 1520.75   35.80
  -2   3  -6 1493.85   35.10
  -3   3   6  162.68    5.20
   3  -3   6  162.28    4.20
  -3  -3  -6  166.08    4.90
   3   3  -6  165.68    4.80
  -3  -3  -6  155.98    4.60
  -3  -3   6  161.48    5.30
  -3   3  -6  158.28    4.20
  -3   3  -6  166.38    4.20
  -4  -3  -6  213.38    5.80
   4   3  -6  209.28    6.10
  -4  -3  -6  214.98    6.10
  -4   3   6  215.38    6.40
  -4  -3   6  201.38    6.60
  -4   3  -6  215.28    5.20
  -4   3  -6  205.18    5.30
   4  -3  -6  213.28    6.10
  -5  -3  -6    2.90    1.00
   5   3  -6    5.10    1.50
   5  -3   6    2.90    0.70
  -5   3   6    2.80    1.40
  -5  -3  -6    2.40    1.20
  -5   3  -6    1.80    0.70
   5  -3  -6    4.50    1.50
  -5  -3   6    1.40    1.50
  -5   3  -6    3.90    0.80
  -5  -3   6    2.40    1.30
  -6  -3  -6  930.01   22.40
  -6   3   6  921.01   22.90
  -6  -3  -6  904.31   22.20
   6   3  -6  893.31   22.60
   6  -3   6  907.21   21.50
  -6  -3   6  893.51   22.50
  -6  -3   6  931.21   23.10
  -6   3  -6  883.71   21.50
  -6   3  -6  935.81   21.60
   6  -3  -6  924.91   22.60
  -7   3   6    5.90    1.90
   7   3  -6    5.50    2.10
  -7  -3  -6    3.30    1.70
   7  -3   6    5.80    1.00
  -7  -3  -6    4.20    1.40
  -7  -3   6    4.60    2.10
  -7   3  -6    4.10    1.30
  -7   3  -6    4.40    1.10
   7  -3  -6    6.20    2.20
  -7  -3   6    3.20    1.80
  -8  -3  -6   93.49    4.60
   8  -3   6   86.59    3.20
   8   3  -6   90.49    5.40
  -8   3   6   91.79    4.50
  -8  -3  -6   90.99    4.20
  -8  -3   6   82.49    4.80
   8  -3  -6   87.59    5.20
  -8  -3   6   92.49    4.80
  -8   3  -6   87.19    3.60
  -9  -3  -6   70.29    4.20
  -9   3   6   80.29    4.90
  -9  -3  -6   72.99    4.70
  -9   3  -6   62.89    3.60
  -9  -3   6   63.39    4.60
  -9  -3   6   74.79    5.00
 -10  -3  -6   13.20    2.50
 -10   3   6   14.50    3.10
 -10  -3  -6    9.40    3.20
 -10  -3   6   11.50    2.90
 -10  -3   6    8.50    3.00
 -11  -3  -6   20.20    3.40
 -11  -3  -6   13.00    3.80
 -11   3   6   24.50    3.70
 -12  -3  -6   93.29    7.40
 -12   3   6   99.49    6.70
 -12  -3  -6   96.59    6.10
 -12  -3   6   84.99    6.30
 -13  -3  -6   40.00    4.30
 -13  -3  -6   27.50    5.20
 -13   3   6   38.00    5.00
 -13  -3   6   35.40    4.70
 -14   3   6  169.58    9.60
 -14  -3  -6  144.29    8.30
 -14  -3   6  163.58    8.80
 -15  -3   6   75.59    8.70
   0  -4   6 2497.35   58.49
   0   4   6 2551.44   58.89
   0  -4  -6 2530.25   58.29
   0  -4   6 2522.45   58.29
   0   4  -6 2465.75   58.49
   0   4  -6 2449.55   58.19
   0  -4  -6 2534.05   58.79
   1  -4   6    5.80    0.90
   1  -4   6    7.20    0.90
  -1   4   6    6.50    1.30
   1   4  -6    5.30    0.90
  -1  -4  -6    5.90    0.90
  -1  -4  -6    3.80    1.00
   1   4  -6    4.70    1.40
   1  -4  -6    3.10    0.80
  -1   4  -6    5.70    0.80
  -1  -4   6    5.50    1.00
  -1  -4   6    4.70    1.30
  -1   4  -6    5.70    1.00
   1   4   6    4.90    1.10
   1  -4  -6    5.50    1.10
  -2  -4  -6  751.82   18.20
   2  -4   6  753.42   17.70
  -2  -4  -6  746.93   17.80
   2  -4   6  724.33   17.50
   2   4  -6  740.13   17.90
  -2   4   6  738.23   18.40
   2  -4  -6  723.93   17.90
  -2  -4   6  758.82   18.40
  -2   4  -6  756.62   17.60
  -2  -4   6  719.13   17.90
   2  -4  -6  737.23   18.30
   3  -4   6 1415.86   32.90
   3   4  -6 1379.96   33.60
  -3   4   6 1426.06   34.00
  -3  -4  -6 1423.06   33.80
  -3  -4  -6 1397.26   33.40
   3  -4   6 1409.76   33.30
  -3  -4   6 1449.35   34.10
  -3   4  -6 1459.55   32.90
   3  -4  -6 1394.36   33.90
  -4  -4  -6   89.59    4.60
  -4   4   6  101.59    4.10
   4   4  -6   95.89    3.60
  -4  -4  -6   97.09    3.40
  -4  -4   6   94.69    4.10
  -5  -4  -6    8.70    1.40
  -5   4   6    6.40    1.60
   5   4  -6    7.40    1.60
  -5  -4  -6    9.50    1.40
  -5  -4   6    8.00    1.60
   5  -4  -6    9.80    1.80
  -5  -4   6    5.30    1.80
   6   4  -6  448.66   12.40
  -6   4   6  465.55   12.50
  -6  -4  -6  464.15   12.10
  -6  -4  -6  484.15   12.10
  -6  -4   6  449.06   12.70
   6  -4  -6  467.65   12.40
  -6  -4   6  447.96   12.30
  -7   4   6   16.00    2.30
  -7  -4  -6   15.30    1.90
   7   4  -6    8.50    2.30
  -7  -4  -6   13.30    2.10
   7  -4  -6   14.60    2.60
  -7  -4   6   14.50    2.30
  -7  -4   6   11.50    2.40
  -8  -4  -6   65.99    3.80
  -8   4   6   67.39    4.40
   8   4  -6   57.49    4.80
  -8  -4  -6   62.29    4.10
  -8   4  -6   60.69    2.60
  -8  -4   6   59.09    4.40
   8  -4  -6   62.99    5.00
  -8  -4   6   69.89    4.70
  -9  -4  -6    5.80    2.00
  -9   4   6    7.20    2.50
  -9  -4  -6    4.50    2.60
  -9  -4   6    6.10    2.60
  -9  -4   6    9.30    2.90
 -10  -4  -6  137.79    6.90
 -10  -4  -6  138.09    5.90
 -10   4   6  145.59    6.40
 -10  -4   6  139.39    6.70
 -11   4   6   47.30    5.30
 -11  -4  -6   47.90    4.40
 -11  -4  -6   45.30    5.90
 -11  -4   6   48.10    5.00
 -12  -4  -6   19.80    4.60
 -12  -4  -6   19.40    3.50
 -12   4   6   14.50    4.00
 -12  -4   6   26.60    4.10
 -13  -4  -6   -2.30    3.20
 -13   4   6   -2.10    4.30
 -13  -4  -6    5.50    4.60
 -13  -4   6    4.40    4.00
 -14  -4  -6    3.90    5.70
 -14  -4  -6   -1.20    3.90
 -14  -4   6   16.00    4.50
   0  -5  -6 2128.99   50.49
   0   5   6 2216.18   50.99
   0   5  -6 2142.49   50.49
   0  -5   6 2185.98   50.59
   0  -5   6 2173.08   50.49
   0   5  -6 2117.99   50.59
   0  -5  -6 2160.58   50.89
   1  -5   6  189.08    5.20
   1  -5   6  195.48    5.30
   1   5  -6  184.78    5.30
  -1  -5  -6  201.18    5.80
  -1  -5   6  188.98    5.40
  -1   5  -6  188.78    5.20
  -1   5  -6  188.98    5.30
   1  -5  -6  186.58    5.30
  -1  -5   6  190.88    5.70
   1  -5  -6  188.18    5.60
   2  -5   6  212.28    5.80
  -2  -5  -6  223.68    6.00
   2  -5   6  220.48    6.00
  -2  -5  -6  228.28    7.80
   2   5  -6  214.78    6.10
  -2   5   6  216.98    6.40
   2  -5  -6  222.88    6.40
  -2   5  -6  226.28    5.70
  -2  -5   6  205.48    6.40
  -3   5   6  116.09    4.10
  -3  -5  -6  113.89    3.70
   3   5  -6  108.09    3.90
   3  -5   6  109.39    3.60
  -3  -5  -6  114.29    4.00
   3  -5  -6  109.89    4.00
   3  -5  -6  111.19    3.80
  -4   5   6  215.58    6.70
  -4  -5  -6  223.78    6.40
   4   5  -6  205.38    6.30
   4  -5   6  213.68    6.00
  -4  -5  -6  198.78    6.00
  -4  -5   6  206.88    6.30
  -4  -5   6  216.38    6.70
   4  -5  -6  207.48    6.40
  -5   5   6    1.90    1.50
   5   5  -6   -0.80    1.50
  -5  -5  -6    3.00    1.20
  -5  -5  -6    3.60    1.30
  -5  -5   6    1.10    1.50
  -5  -5   6    2.20    1.60
   5  -5  -6    0.30    1.20
  -6  -5  -6  298.97    8.20
   6   5  -6  289.67    8.60
  -6   5   6  282.07    8.50
  -6  -5  -6  296.47    8.50
  -6  -5   6  286.57    8.90
  -6  -5   6  282.77    8.60
   6  -5  -6  294.07    8.70
   7   5  -6    7.40    2.20
  -7  -5  -6    8.10    1.70
  -7  -5  -6    6.70    2.00
  -7   5   6    8.30    2.10
  -7  -5   6    5.10    2.00
  -7  -5   6    7.90    2.30
   7  -5  -6    7.60    2.30
  -8  -5  -6  185.98    6.30
  -8  -5  -6  186.68    6.60
  -8   5   6  183.08    6.80
  -8  -5   6  176.58    7.30
  -8  -5   6  170.58    6.80
  -9  -5  -6    3.30    2.60
  -9  -5  -6    4.00    2.00
  -9   5   6    0.30    2.40
  -9  -5   6   -0.90    2.50
  -9  -5   6    1.10    2.80
 -10  -5  -6   34.80    4.00
 -10   5   6   30.40    3.60
 -10  -5  -6   32.10    3.20
 -10  -5   6   36.60    4.10
 -11  -5  -6   23.70    3.20
 -11   5   6   29.40    3.90
 -11  -5  -6   28.80    4.30
 -11  -5   6   23.00    3.80
 -12  -5  -6   42.60    5.20
 -12   5   6   38.90    4.60
 -12  -5  -6   35.30    3.80
 -12  -5   6   36.80    4.60
 -13  -5  -6   37.20    4.50
 -13  -5  -6   35.70    5.70
 -13  -5   6   53.79    6.80
 -14  -5  -6   45.40    6.80
 -14  -5  -6   49.99    5.20
 -14  -5   6   44.30    5.80
   0  -6   6  268.77    7.20
   0  -6  -6  278.57    7.20
   0  -6   6  262.87    7.20
   0   6  -6  273.77    7.20
   0   6  -6  249.68    7.20
   0  -6  -6  266.97    7.60
   1   6  -6  191.08    5.70
  -1  -6  -6  201.68    6.00
  -1  -6  -6  194.58    5.60
   1  -6   6  205.18    5.50
   1  -6   6  196.88    5.70
  -1   6  -6  199.08    5.50
  -1  -6   6  201.28    5.90
  -1   6  -6  195.98    5.60
   1  -6  -6  198.98    5.70
   2  -6   6  332.17    8.80
  -2  -6  -6  340.97    8.80
  -2  -6  -6  340.87    9.10
   2  -6   6  340.07    8.30
  -2   6   6  312.97    9.80
  -2   6  -6  334.37    8.20
  -2  -6   6  335.27    9.20
   2  -6  -6  346.57    8.90
   2  -6  -6  316.27    9.60
  -3   6   6   97.09    3.80
   3   6  -6   90.99    3.70
  -3  -6  -6  101.99    3.80
   3  -6   6   93.09    3.40
  -3  -6  -6   99.59    3.50
   3  -6  -6   93.79    3.50
  -3  -6   6   92.19    3.70
   3  -6  -6   95.89    3.70
  -4  -6  -6  739.43   18.30
  -4   6   6  744.73   18.50
   4   6  -6  717.73   18.30
   4  -6   6  743.13   18.00
  -4  -6  -6  719.43   18.00
   4  -6  -6  718.03   18.30
  -4  -6   6  719.13   18.70
  -4  -6   6  742.53   18.30
   5   6  -6    1.50    1.70
  -5  -6  -6    0.70    1.30
  -5   6   6    1.60    1.50
  -5  -6  -6   -0.70    1.10
   5  -6   6    2.30    1.40
  -5  -6   6    1.40    1.70
  -5  -6   6   -0.90    1.50
   5  -6  -6    1.80    1.20
  -6  -6  -6  151.88    5.40
  -6  -6  -6  147.99    5.10
   6   6  -6  146.79    5.80
  -6   6   6  137.89    5.30
  -6  -6   6  148.29    5.70
   6  -6  -6  143.09    5.20
  -6  -6   6  139.49    5.80
  -7   6   6   76.39    4.10
   7   6  -6   78.29    4.70
  -7  -6  -6   74.99    4.20
  -7  -6  -6   77.19    4.00
  -7  -6   6   77.69    4.70
   7  -6  -6   74.59    3.90
   7  -6  -6   74.89    4.90
  -7  -6   6   80.99    4.70
  -8   6   6   46.10    4.00
  -8  -6  -6   47.80    4.30
  -8  -6  -6   53.19    3.70
  -8  -6   6   54.29    4.40
  -8  -6   6   39.60    4.40
  -9  -6  -6   83.89    5.30
  -9  -6  -6   93.09    4.80
  -9   6   6   95.69    5.30
  -9  -6   6   93.69    5.70
  -9  -6   6   86.19    5.80
 -10   6   6   80.09    5.40
 -10  -6  -6   76.39    5.70
 -10  -6  -6   74.19    5.70
 -10  -6   6   83.69    6.10
 -11   6   6   -0.40    3.20
 -11  -6  -6   -3.80    2.40
 -11  -6   6   -0.80    3.10
 -12  -6  -6   38.90    5.30
 -12   6   6   45.20    4.90
 -12  -6  -6   38.20    4.20
 -12  -6   6   47.50    5.10
 -13  -6  -6   13.00    5.50
 -13  -6  -6   22.00    3.90
 -13  -6   6   25.50    4.60
 -14  -6  -6   12.10    6.10
 -14  -6  -6   10.90    4.50
 -14  -6   6   17.50    5.10
   0  -7  -6  811.12   19.70
   0  -7  -6  801.62   19.40
   0   7  -6  769.82   19.40
   0  -7   6  783.42   19.30
  -1  -7  -6   30.70    2.20
  -1   7   6   28.00    2.30
  -1  -7  -6   26.90    2.00
   1  -7   6   27.00    2.60
   1  -7   6   24.90    1.90
  -1   7  -6   27.00    2.00
  -1  -7   6   26.50    2.20
  -1   7  -6   25.40    2.10
   1  -7  -6   28.70    2.20
   1  -7  -6   25.80    2.10
  -2   7   6  815.52   20.10
  -2  -7  -6  824.12   20.10
   2   7  -6  817.62   19.90
   2  -7   6  813.12   19.80
   2  -7   6  830.62   19.20
  -2  -7  -6  813.12   19.80
   2  -7  -6  813.42   20.00
  -2  -7   6  741.83   20.50
  -2   7  -6  788.52   19.70
   2  -7  -6  798.22   19.80
  -2   7  -6  792.32   19.00
   3   7  -6   76.99    3.50
  -3  -7  -6   73.19    3.30
   3  -7   6   69.79    3.20
  -3  -7  -6   74.29    3.20
  -3   7   6   76.09    3.50
  -3   7  -6   74.19    2.20
  -3  -7   6   71.99    3.70
   3  -7  -6   74.59    3.30
   3  -7  -6   81.29    3.30
  -3  -7   6   72.39    3.50
  -4  -7  -6  222.38    6.50
   4   7  -6  216.98    6.80
  -4   7   6  210.78    6.70
  -4  -7  -6  218.58    6.70
   4  -7  -6  210.98    6.60
  -4  -7   6  206.98    7.10
  -4  -7   6  218.28    6.70
   4  -7  -6  220.08    6.60
  -5   7   6   -2.10    1.40
   5   7  -6   -0.50    1.80
  -5  -7  -6    1.30    1.20
  -5  -7  -6    1.70    1.50
   5  -7  -6    0.30    1.30
  -5  -7   6   -0.40    1.70
  -5  -7   6    1.20    1.70
  -6   7   6  227.28    7.50
   6   7  -6  232.98    7.80
  -6  -7  -6  239.68    7.50
  -6  -7  -6  237.88    7.30
   6  -7  -6  231.58    7.20
  -6  -7   6  228.18    7.90
  -6  -7   6  222.38    7.60
  -7  -7  -6   58.99    3.90
  -7   7   6   63.69    4.00
  -7  -7  -6   63.39    4.10
   7  -7  -6   65.19    3.60
  -7  -7   6   58.69    4.60
  -7  -7   6   56.89    4.50
  -8  -7  -6    4.40    2.40
  -8   7   6    0.90    2.20
  -8  -7  -6    7.10    2.20
   8  -7  -6   -1.90    1.80
  -8  -7   6    2.60    2.50
  -8  -7   6    5.50    2.80
  -9  -7  -6    1.60    2.20
  -9  -7  -6   -2.10    2.50
  -9   7   6   -0.20    2.40
  -9  -7   6    4.00    2.70
   9  -7  -6    0.50    2.00
 -10  -7  -6  109.09    7.30
 -10   7   6  121.69    6.30
 -10  -7  -6  115.49    6.00
 -10  -7   6  125.09    6.80
  10  -7  -6  112.39    5.50
 -11  -7  -6   10.70    3.90
 -11   7   6   12.40    3.60
 -11  -7  -6   11.90    3.10
 -11  -7   6   12.50    3.90
 -12  -7  -6   28.80    5.20
 -12  -7  -6   22.60    3.80
 -12  -7   6   31.90    4.90
 -13  -7  -6   15.50    5.50
 -13  -7  -6   12.90    4.00
 -13  -7   6   17.40    4.70
 -14  -7  -6   25.50    6.60
 -14  -7  -6   25.90    4.70
 -14  -7   6   26.30    5.80
   0  -8   6  148.99    4.80
   0  -8  -6  150.08    5.10
   0  -8  -6  148.09    4.90
   0   8  -6  145.59    4.90
  -1  -8  -6    1.70    1.10
   1   8  -6    3.90    1.40
   1  -8   6    0.90    1.20
  -1  -8  -6    3.50    1.30
   1  -8  -6    0.00    1.20
  -1  -8   6    1.50    1.30
   1  -8  -6    1.40    1.20
  -1  -8   6    0.90    1.20
  -1   8  -6    3.00    1.20
  -2  -8  -6   83.79    3.50
  -2   8   6   84.79    3.70
   2  -8   6   77.29    3.00
   2   8  -6   83.69    3.70
  -2  -8  -6   85.99    3.60
  -2   8  -6   77.29    2.80
   2  -8  -6   84.19    3.50
  -2   8  -6   77.49    3.50
   2  -8  -6   77.39    3.50
  -2  -8   6   79.29    3.70
  -2  -8   6   80.59    3.90
   3   8  -6    2.20    1.70
  -3  -8  -6    1.40    1.30
  -3  -8  -6    2.10    1.40
   3  -8   6   -0.10    0.80
  -3   8   6    1.60    1.40
  -3  -8   6    0.20    1.70
   3  -8  -6    0.90    1.40
  -3   8  -6    1.50    0.80
  -3  -8   6    1.00    1.50
   3  -8  -6    0.90    1.30
  -4   8   6  119.19    4.80
  -4  -8  -6  115.29    4.40
   4   8  -6  124.29    4.90
  -4  -8  -6  121.29    4.70
  -4  -8   6  119.89    5.10
  -4  -8   6  115.09    4.90
   4  -8  -6  120.69    4.50
   4  -8  -6  120.49    4.60
   5   8  -6   61.09    4.30
  -5  -8  -6   65.89    3.40
  -5   8   6   58.39    3.50
  -5  -8  -6   63.49    3.60
   5  -8  -6   63.79    3.60
  -5  -8   6   60.19    4.20
  -5  -8   6   74.09    4.30
   5  -8  -6   60.89    3.40
  -6  -8  -6  385.76   10.90
  -6  -8  -6  392.06   11.10
  -6   8   6  396.36   11.00
   6  -8  -6  378.56   10.90
  -6  -8   6  377.36   11.60
  -6  -8   6  381.56   11.20
   6  -8  -6  380.86   10.80
  -7  -8  -6  344.07   10.20
  -7  -8  -6  340.57    9.90
  -7   8   6  323.57    9.90
  -7  -8   6  306.97   10.10
   7  -8  -6  335.17    9.70
  -7  -8   6  318.07   10.50
  -8   8   6   32.00    3.70
  -8  -8  -6   28.20    3.30
  -8  -8  -6   32.60    3.90
   8  -8  -6   41.00    3.60
  -8  -8   6   39.70    4.60
  -9   8   6   10.50    2.90
  -9  -8  -6    8.50    3.10
  -9  -8  -6    9.10    2.70
   9  -8  -6    6.30    2.40
  -9  -8   6   17.40    3.40
 -10  -8  -6    6.80    3.60
 -10   8   6   13.50    3.10
 -10  -8  -6   15.30    3.00
  10  -8  -6   12.50    2.80
 -10  -8   6   15.70    3.50
 -11   8   6    2.00    3.60
 -11  -8  -6   -4.50    3.90
 -11  -8  -6   -0.60    2.80
 -11  -8   6    5.20    3.70
  11  -8  -6   -1.10    2.70
 -12  -8  -6   66.89    8.10
 -12  -8  -6   65.39    6.30
 -12  -8   6   61.39    7.50
 -13  -8  -6   11.80    5.70
 -13  -8  -6    8.20    4.10
 -13  -8   6   20.60    4.90
   0  -9   6  206.78    6.50
   0  -9  -6  207.98    6.40
   0  -9  -6  208.58    6.50
   0   9  -6  201.48    6.50
   0  -9   6  211.58    6.50
   1   9  -6    0.20    1.40
  -1  -9  -6   -0.90    1.20
   1  -9   6    0.10    1.40
   1  -9   6   -0.30    1.40
  -1  -9  -6    0.00    1.40
  -1  -9   6    0.00    1.60
  -1   9  -6   -0.30    1.40
   1  -9  -6    0.30    1.30
  -1  -9   6   -0.20    1.40
   1  -9  -6   -0.90    1.20
   2  -9   6  355.56    9.30
   2   9  -6  359.56   10.10
  -2  -9  -6  380.66   10.00
  -2  -9  -6  362.96   10.10
   2  -9  -6  365.96   10.00
  -2   9  -6  361.46    9.90
  -2   9  -6  339.17    9.10
  -2  -9   6  355.36   10.10
  -2  -9   6  356.96   10.30
   2  -9  -6  359.86   10.00
   3  -9   6   93.69    3.10
  -3   9   6   91.39    4.10
  -3  -9  -6   89.49    4.10
   3   9  -6   90.49    4.40
  -3  -9  -6   96.39    4.20
   3  -9  -6   95.29    4.10
  -3  -9   6   95.99    4.50
   3  -9  -6   95.09    4.10
  -3   9  -6   96.89    3.00
  -3  -9   6   91.69    4.80
  -4  -9  -6  426.26   11.60
   4   9  -6  425.26   12.00
  -4  -9  -6  424.06   11.80
  -4   9   6  422.96   11.80
  -4  -9   6  435.66   12.00
  -4  -9   6  420.66   12.30
   4  -9  -6  432.66   11.80
   4  -9  -6  433.16   11.70
   5  -9   6   29.90    2.80
  -5  -9  -6   41.70    3.40
  -5  -9  -6   33.00    3.10
  -5   9   6   33.90    3.20
  -5  -9   6   36.60    4.00
   5  -9  -6   31.20    3.00
  -5  -9   6   30.70    4.00
   5  -9  -6   31.30    3.10
  -6   9   6   26.10    2.90
  -6  -9  -6   26.60    3.40
  -6  -9  -6   31.40    3.20
   6  -9  -6   31.40    3.00
  -6  -9   6   28.40    3.30
   6  -9  -6   29.70    3.00
  -6  -9   6   30.10    3.30
  -7  -9  -6  207.98    7.80
  -7   9   6  199.68    7.30
  -7  -9  -6  219.98    7.50
  -7  -9   6  218.28    8.20
   7  -9  -6  218.98    7.60
   7  -9  -6  213.88    7.10
  -7  -9   6  220.28    9.60
  -8  -9  -6  124.49    6.00
  -8  -9  -6  123.49    6.20
  -8   9   6  126.89    5.90
   8  -9  -6  127.19    5.40
  -9  -9  -6   15.60    3.30
  -9  -9  -6   14.10    3.50
  -9   9   6   14.10    3.10
   9  -9  -6   11.90    2.70
  -9  -9   6   14.80    3.40
 -10  -9  -6    5.30    2.60
 -10  -9  -6    0.80    3.40
 -10   9   6    1.50    3.10
 -10  -9   6    6.10    3.10
  10  -9  -6    1.90    2.60
 -11  -9  -6   36.40    5.40
 -11  -9  -6   42.20    4.40
 -12  -9  -6   64.99    7.70
 -12  -9  -6   65.69    6.60
 -12  -9   6   78.19    7.60
 -13  -9  -6   10.80    4.30
 -13  -9  -6    8.80    5.90
 -13  -9   6   17.80    5.10
   0 -10   6   86.29    7.10
   0 -10  -6   99.09    4.30
   0 -10  -6   92.19    4.10
   0 -10   6   89.09    4.30
   0  10  -6   92.79    4.40
  -1 -10  -6  269.37    8.10
   1 -10   6  265.37    7.80
   1 -10   6  266.97    8.20
  -1 -10  -6  267.07    8.00
   1  10  -6  262.87    8.30
   1 -10  -6  270.07    8.00
   1 -10  -6  268.47    8.10
  -1 -10   6  266.87    8.40
  -1 -10   6  269.27    8.20
  -1  10  -6  275.47    8.20
   2 -10   6   78.39    3.60
  -2 -10  -6   76.29    4.00
  -2 -10  -6   78.09    3.90
   2  10  -6   80.09    4.40
   2 -10   6   77.09    4.20
   2 -10  -6   84.79    4.00
   2 -10  -6   83.99    4.00
  -2 -10   6   77.39    4.20
  -2 -10   6   80.09    4.50
  -2  10  -6   75.69    4.00
  -3 -10  -6    5.40    1.70
   3 -10   6    5.10    2.10
   3 -10   6    3.20    1.50
  -3 -10  -6    6.40    1.90
   3  10  -6    6.00    2.30
  -3  10  -6    4.00    1.30
   3 -10  -6    5.00    1.80
   3 -10  -6    2.90    1.60
  -3 -10   6    3.20    2.40
  -3 -10   6    4.90    2.20
  -4 -10  -6   10.00    2.00
   4 -10   6   12.20    2.50
  -4 -10  -6   10.80    2.10
  -4  10   6   11.80    2.20
  -4 -10   6   10.70    2.50
   4 -10  -6   12.90    2.10
  -4 -10   6    9.80    2.80
   4 -10  -6    8.00    1.90
  -5 -10  -6  421.06   11.80
  -5 -10  -6  405.46   11.50
  -5  10   6  411.86   11.50
   5 -10  -6  403.16   11.50
  -5 -10   6  388.76   12.20
  -5 -10   6  398.86   11.90
   5 -10  -6  401.36   11.30
  -6 -10  -6    4.50    1.90
  -6 -10  -6    3.90    2.20
  -6  10   6    6.10    2.30
  -6 -10   6    7.90    2.80
   6 -10  -6    5.80    2.00
   6 -10  -6    3.30    2.00
  -7  10   6   70.39    4.50
  -7 -10  -6   72.39    4.80
  -7 -10  -6   70.19    4.90
   7 -10  -6   78.39    4.50
  -7 -10   6   74.89    5.50
   7 -10  -6   72.69    4.80
  -8  10   6   42.50    4.40
  -8 -10  -6   45.70    5.10
  -8 -10  -6   53.19    4.60
   8 -10  -6   48.10    4.00
   8 -10  -6   50.29    4.70
  -8 -10   6   55.59    5.20
  -9  10   6   78.29    5.40
  -9 -10  -6   78.49    5.50
  -9 -10  -6   69.39    5.80
   9 -10  -6   70.09    5.80
   9 -10  -6   68.39    4.80
  -9 -10   6   78.09    5.90
 -10 -10  -6   75.99    6.60
 -10 -10  -6   77.39    6.10
  10 -10  -6   84.19    6.30
 -10 -10   6   84.79    6.60
 -11 -10  -6   33.30    4.20
 -11 -10  -6   24.50    5.20
 -11 -10   6   47.10    6.10
 -12 -10  -6    8.80    3.80
 -12 -10  -6    7.00    5.50
 -12 -10   6   20.80    5.00
 -13 -10  -6   52.49    5.90
 -13 -10  -6   53.09    7.20
   0 -11   6 1098.59   27.10
   0 -11  -6 1112.49   27.20
   0 -11   6 1073.79   27.20
   0 -11  -6 1106.19   27.20
   1 -11   6   98.79    4.80
  -1 -11  -6  101.69    4.60
  -1 -11  -6   98.99    4.60
   1 -11   6  101.49    4.80
  -1 -11   6  102.99    5.00
  -1 -11   6  106.59    5.20
   1 -11  -6  102.09    4.80
   1 -11  -6  103.19    4.60
   2 -11   6   -2.10    2.20
   2 -11   6    0.70    1.90
  -2 -11  -6   -1.80    1.80
  -2 -11  -6    1.90    1.80
   2 -11  -6    1.40    1.80
  -2 -11   6   -0.50    2.00
   2 -11  -6   -0.30    1.80
  -2 -11   6   -0.40    2.30
  -3 -11  -6   12.10    2.20
   3 -11   6   15.40    1.90
  -3 -11  -6   19.50    2.50
  -3 -11   6   12.90    2.60
   3 -11  -6   12.10    2.10
   3 -11  -6   16.50    2.50
  -3 -11   6   14.40    3.00
  -4 -11  -6  468.45   13.20
  -4 -11  -6  470.85   13.10
   4 -11  -6  464.35   13.10
  -4 -11   6  480.15   13.70
  -4 -11   6  463.35   13.70
   4 -11  -6  466.35   12.80
  -5  11   6  178.98    6.60
  -5 -11  -6  176.48    6.80
  -5 -11  -6  173.38    6.50
  -5 -11   6  169.98    7.50
   5 -11  -6  174.18    6.30
   5 -11  -6  174.58    6.70
  -6 -11  -6    5.80    2.50
  -6  11   6    9.80    2.50
  -6 -11  -6   13.10    2.40
   6 -11  -6   10.90    2.70
  -6 -11   6   11.40    3.30
   6 -11  -6   11.10    2.30
  -7 -11  -6   17.30    3.30
  -7  11   6   18.50    3.00
  -7 -11  -6   14.80    2.70
  -7 -11   6   23.50    3.60
   7 -11  -6   21.60    2.90
   7 -11  -6   20.50    3.30
  -8 -11  -6   82.19    5.80
  -8 -11  -6   89.89    5.80
  -8  11   6   84.09    5.40
   8 -11  -6   90.49    5.00
   8 -11  -6   96.29    5.80
  -8 -11   6   81.39    6.10
  -9 -11  -6   41.50    4.70
  -9 -11  -6   59.29    5.70
  -9 -11   6   41.30    4.60
   9 -11  -6   48.70    5.70
 -10 -11  -6    6.70    3.40
 -10 -11  -6    2.70    3.90
  10 -11  -6    8.20    4.10
 -10 -11   6   18.90    4.20
 -11 -11  -6   31.10    5.60
 -11 -11  -6   40.40    4.50
 -11 -11   6   61.69    6.50
 -12 -11  -6   10.60    4.30
 -12 -11  -6   18.70    5.70
   0 -12  -6  308.47    9.20
   0 -12  -6  293.87    9.20
   0 -12   6  289.17    9.20
  -1 -12  -6  111.79    4.90
   1 -12   6  100.49    5.00
  -1 -12  -6  109.59    5.00
  -1 -12   6  106.89    5.60
   1 -12  -6  109.79    5.00
   1 -12  -6  109.29    4.80
   2 -12   6  220.58    7.20
  -2 -12  -6  230.98    7.70
  -2 -12  -6  220.88    7.70
  -2 -12   6  231.28    8.30
   2 -12  -6  233.88    7.50
   2 -12  -6  230.28    7.70
  -3 -12  -6    1.60    2.00
  -3 -12  -6    0.10    1.90
   3 -12   6    0.60    2.20
  -3 -12   6    3.40    2.80
   3 -12  -6    3.20    2.10
   3 -12  -6   -0.20    1.80
  -4 -12  -6    1.90    2.10
  -4 -12  -6    1.50    2.20
   4 -12  -6    2.90    2.10
   4 -12  -6   -1.00    1.90
  -4 -12   6    0.40    2.90
  -5 -12  -6   77.79    4.70
   5 -12  -6   82.59    5.00
   5 -12  -6   75.39    4.50
  -5 -12   6   76.39    5.60
  -6 -12  -6   57.49    4.70
  -6 -12  -6   51.09    4.50
   6 -12  -6   47.60    4.10
   6 -12  -6   49.50    4.00
  -7 -12  -6   25.30    3.80
  -7  12   6   29.30    3.50
  -7 -12  -6   25.70    3.40
  -7 -12   6   40.90    5.20
   7 -12  -6   36.30    4.00
   7 -12  -6   30.50    3.80
  -8  12   6   33.90    3.80
  -8 -12  -6   35.00    4.10
  -8 -12  -6   25.10    4.00
   8 -12  -6   31.00    3.50
  -8 -12   6   35.00    4.60
   8 -12  -6   36.50    4.10
  -9 -12  -6   17.20    4.10
  -9 -12  -6   19.60    3.90
  -9 -12   6   27.00    4.30
   9 -12  -6   17.00    3.90
 -10 -12  -6   39.00    4.50
 -10 -12  -6   36.90    5.30
 -10 -12   6   61.09    6.70
 -11 -12  -6   31.40    4.70
 -11 -12   6   36.60    5.50
   0 -13   6    5.40    2.70
   0 -13  -6    2.10    2.10
   0 -13  -6    4.60    2.20
  -1 -13  -6   14.20    2.60
   1 -13   6   16.00    2.90
  -1 -13  -6   16.30    2.70
   1 -13  -6   16.20    2.60
  -1 -13   6   16.80    3.20
   1 -13  -6   13.50    2.60
  -2 -13  -6  373.96   11.20
  -2 -13  -6  373.46   11.10
  -2 -13   6  358.66   11.60
   2 -13  -6  367.06   10.80
   2 -13  -6  380.36   11.30
  -3 -13  -6   40.50    4.00
  -3 -13  -6   39.20    4.30
   3 -13  -6   37.20    3.80
   3 -13  -6   37.20    4.40
  -3 -13   6   38.70    4.20
  -4 -13  -6   71.49    4.90
  -4 -13  -6   61.79    4.80
  -4 -13   6   70.99    5.80
   4 -13  -6   71.69    4.40
   4 -13  -6   69.89    5.00
  -5 -13  -6   17.90    2.80
  -5 -13  -6   19.20    3.10
   5 -13  -6   19.20    3.20
  -5 -13   6   25.60    4.40
   5 -13  -6   22.70    2.90
  -6 -13  -6    9.60    3.10
  -6 -13  -6    9.20    2.90
  -6 -13   6    9.40    3.50
   6 -13  -6   11.20    2.80
   6 -13  -6   13.20    3.10
  -7 -13  -6   -1.30    2.90
  -7 -13  -6    2.60    2.70
   7 -13  -6   -0.80    2.50
   7 -13  -6    3.90    3.10
  -7 -13   6    6.60    3.60
  -8 -13  -6   12.50    3.30
  -8 -13  -6   12.10    4.10
  -8 -13   6   21.90    4.30
   8 -13  -6   21.10    4.10
  -9 -13  -6    9.10    4.10
  -9 -13  -6   26.40    4.20
  -9 -13   6   18.50    4.40
 -10 -13  -6   54.09    6.10
 -10 -13  -6   80.89    7.50
 -10 -13   6   76.69    7.50
 -11 -13  -6   32.70    5.30
   0 -14   6   59.29    5.40
   0 -14  -6   58.49    4.50
   0 -14  -6   58.19    4.80
   1 -14   6    7.70    3.00
  -1 -14  -6    7.70    2.60
  -1 -14  -6    9.20    2.60
   1 -14  -6    9.20    2.60
  -1 -14   6    8.40    3.30
   1 -14  -6    9.70    2.70
  -2 -14  -6    1.30    2.50
  -2 -14   6    4.50    3.20
   2 -14  -6    8.10    2.70
   2 -14  -6    2.70    2.40
  -3 -14  -6   22.90    3.20
  -3 -14  -6   22.00    3.10
   3 -14  -6   22.20    3.00
   3 -14  -6   24.40    3.30
  -3 -14   6   21.70    4.00
  -4 -14  -6    8.30    2.90
  -4 -14  -6   12.20    3.30
   4 -14  -6    8.10    2.80
  -4 -14   6    7.40    3.50
   4 -14  -6   10.70    3.10
  -5 -14  -6   11.70    3.20
  -5 -14  -6   17.40    3.10
   5 -14  -6    8.70    3.10
   5 -14  -6   13.70    2.90
  -5 -14   6    8.50    3.60
  -6 -14  -6   31.90    4.20
  -6 -14  -6   33.20    4.00
   6 -14  -6   38.20    4.60
  -6 -14   6   39.70    4.80
   6 -14  -6   32.90    4.00
  -7 -14  -6    3.20    3.00
  -7 -14  -6    9.10    3.60
  -7 -14   6   10.20    4.20
  -8 -14  -6    3.50    3.70
  -8 -14  -6   -1.80    3.70
  -8 -14   6   17.10    4.40
  -9 -14  -6    4.90    4.00
  -9 -14  -6   -0.80    4.20
  -9 -14   6   15.00    4.50
 -10 -14  -6   29.50    8.10
 -10 -14  -6   36.00    5.20
 -10 -14   6   29.90    5.90
   0 -15   6    5.60    3.20
   0 -15  -6    6.50    2.80
  -1 -15  -6   13.40    3.00
  -1 -15  -6   12.20    2.80
  -1 -15   6   16.00    3.70
   1 -15  -6   11.90    3.00
   1 -15  -6   16.10    3.20
  -2 -15  -6  115.89    8.70
  -2 -15  -6  112.39    6.20
   2 -15  -6  112.89    5.60
   2 -15  -6  110.39    6.40
  -2 -15   6  114.29    7.20
  -3 -15  -6    4.80    2.90
  -3 -15  -6    3.60    3.00
   3 -15  -6    4.10    3.20
  -3 -15   6    3.70    3.70
   3 -15  -6    5.90    2.70
  -4 -15  -6   97.39    6.20
  -4 -15  -6   93.29    6.30
   4 -15  -6   96.79    5.50
   4 -15  -6   97.29    6.50
  -4 -15   6   89.99    7.30
  -5 -15  -6   -6.50    3.10
  -5 -15  -6    5.20    2.90
  -5 -15   6    4.60    3.80
   5 -15  -6   -2.50    2.80
  -6 -15  -6   22.40    3.70
  -6 -15  -6   24.80    4.30
  -6 -15   6   26.30    4.80
   6 -15  -6   30.90    4.50
  -7 -15  -6   14.50    3.60
  -7 -15  -6    8.60    4.20
  -7 -15   6   21.60    4.80
  -8 -15  -6    4.20    4.20
  -8 -15  -6    9.10    3.90
  -8 -15   6   22.30    4.80
  -9 -15  -6    3.20    7.10
  -9 -15  -6   22.60    4.80
  -9 -15   6   24.40    5.10
   0 -16  -6    0.90    2.70
   0 -16  -6   -0.20    2.90
  -1 -16  -6   27.10    4.10
  -1 -16  -6   30.10    3.80
   1 -16  -6   29.90    4.00
   1 -16  -6   22.50    3.50
  -1 -16   6   31.00    4.50
  -2 -16  -6   26.20    3.80
  -2 -16  -6   24.90    3.70
   2 -16  -6   22.20    3.80
  -2 -16   6   28.80    4.70
   2 -16  -6   26.80    3.70
  -3 -16  -6   11.70    3.40
  -3 -16  -6   17.50    3.90
  -3 -16   6   11.10    4.40
   3 -16  -6    5.30    4.10
   3 -16  -6   12.60    3.60
  -4 -16  -6   58.39    6.30
  -4 -16  -6   45.40    5.50
   4 -16  -6   59.99    6.60
  -4 -16   6   49.70    5.60
  -5 -16  -6   11.70    4.00
  -5 -16  -6   24.30    4.10
   5 -16  -6   17.70    4.20
  -5 -16   6   16.70    4.70
  -6 -16  -6   17.60    4.30
  -6 -16  -6   12.60    3.90
  -6 -16   6   29.60    5.00
  -7 -16  -6   22.40    4.90
  -7 -16  -6   26.20    4.30
  -7 -16   6   34.70    5.50
  -8 -16  -6   20.90    4.70
   0 -17  -6   -0.30    3.30
   0 -17  -6    3.00    3.30
  -1 -17  -6    1.60    3.50
  -1 -17  -6   -2.10    3.30
   1 -17  -6    0.10    3.20
   1 -17  -6   -0.10    3.20
  -2 -17  -6   62.09    6.60
  -2 -17  -6   48.40    5.80
   2 -17  -6   54.39    5.00
  -2 -17   6   46.90    5.60
   2 -17  -6   51.69    5.60
  -3 -17  -6    3.80    3.70
  -3 -17  -6    1.00    3.50
   3 -17  -6    0.00    3.70
  -3 -17   6    5.00    4.80
   3 -17  -6   -4.20    3.10
  -4 -17  -6  123.69    8.00
  -4 -17  -6  108.59    7.40
  -4 -17   6  122.39    8.90
   4 -17  -6  120.09    8.10
   4 -17  -6  108.19    9.80
  -5 -17  -6   -0.90    4.10
  -5 -17  -6    5.90    3.60
  -5 -17   6    2.30    4.90
  -6 -17  -6   10.40    4.50
  -6 -17  -6    9.70    4.70
  -6 -17   6   18.20    5.30
  -7 -17  -6   13.80    4.50
  -7 -17   6   23.20    5.50
   0 -18  -6  164.88    8.80
   0 -18  -6  151.68    8.50
  -1 -18  -6   12.30    4.40
  -1 -18  -6   17.00    4.50
   1 -18  -6   17.80    4.10
   1 -18  -6    9.80    4.30
  -2 -18  -6   -2.40    3.90
  -2 -18  -6    0.70    3.90
   2 -18  -6    6.70    3.80
   2 -18  -6   -5.80    3.90
  -3 -18  -6    4.00    4.20
  -3 -18  -6   13.90    4.60
  -3 -18   6    2.10    5.10
   3 -18  -6    5.30    5.00
  -4 -18  -6   46.50    5.60
  -4 -18  -6   45.90    5.50
  -4 -18   6   54.99    6.60
  -5 -18  -6    3.00    4.60
  -5 -18  -6   15.60    4.30
  -5 -18   6   11.50    5.30
   0 -19  -6   60.19    7.50
  -1 -19  -6    7.10    4.60
   1 -19  -6    7.20    4.80
  -2 -19  -6   26.70    8.40
  -2 -19  -6   21.60    5.30
   2 -19  -6   39.00    8.10
  -3 -19  -6    4.40    4.80
   0   0   7    2.00    0.90
   0   0  -7    0.70    0.80
  -1   0   7    0.20    1.00
  -1   0  -7    0.10    0.70
  -1   0  -7   -0.60    0.80
   1   0   7    0.10    0.90
   1   0  -7    0.80    0.50
  -2   0   7    0.30    0.70
  -2   0  -7    0.60    0.80
  -2   0   7   -0.20    1.00
  -2   0  -7   -0.70    0.80
   2   0   7    0.50    0.90
   2   0  -7    0.10    0.70
   2   0   7   -1.00    0.80
   2   0   7   -0.20    0.60
  -3   0  -7    0.40    0.80
  -3   0   7    0.00    0.90
   3   0   7   -0.30    0.80
   3   0  -7   -0.10    0.80
  -3   0  -7    1.80    1.00
  -3   0   7   -0.70    1.20
  -4   0   7   -0.10    1.20
  -4   0  -7    0.10    0.80
  -4   0  -7    0.30    1.00
   4   0   7    0.70    0.90
   4   0  -7    0.50    1.10
   5   0   7    1.40    1.20
  -5   0   7    0.80    1.10
   5   0  -7    0.20    1.30
  -5   0  -7   -0.90    0.80
  -5   0   7   -0.60    1.20
  -5   0  -7   -1.00    0.80
  -6   0  -7   -0.20    1.10
  -6   0   7    1.30    1.50
  -6   0  -7    0.00    1.00
   6   0  -7   -0.40    1.60
  -6   0   7   -0.50    1.40
  -7   0   7   -3.10    1.80
  -7   0  -7    0.30    1.40
  -7   0   7    0.10    1.50
   7   0  -7    1.30    2.00
  -8   0   7   -1.00    2.20
   8   0  -7    1.20    2.50
  -8   0   7   -1.20    1.90
  -8   0  -7    2.10    2.00
  -9   0  -7    0.30    2.20
  -9   0   7    2.00    2.50
  -9   0   7    0.00    2.10
 -10   0   7   -1.90    2.40
 -10   0  -7   -0.60    2.70
 -11   0  -7    2.60    3.10
 -11   0   7    1.50    2.80
 -12   0   7   -3.30    3.10
 -13   0   7   -4.20    3.80
 -14   0   7    2.40    4.80
 -15   0   7   13.00    5.40
   0  -1  -7    0.00    0.70
   0  -1  -7   -0.40    0.30
   0   1  -7   -0.40    0.90
   0   1   7   -1.50    0.70
   0  -1   7   -0.60    0.90
  -1   1   7  899.61   21.80
  -1  -1  -7  888.31   21.50
   1  -1   7  904.41   21.50
  -1  -1  -7  875.71   22.00
   1   1  -7  897.01   21.00
  -1   1  -7  897.01   21.40
   1   1   7  918.31   21.70
   1  -1  -7  927.21   21.00
   1   1   7  851.51   21.60
  -1   1  -7  878.01   21.50
  -1  -1   7  899.21   21.70
  -1  -1   7  903.51   21.00
  -2  -1  -7   46.30    2.40
   2  -1   7   45.30    2.10
  -2  -1  -7   48.30    1.50
   2   1  -7   48.30    1.90
  -2  -1  -7   47.80    2.20
  -2   1   7   47.70    2.60
   2   1   7   42.70    2.30
  -2   1  -7   46.10    2.10
   2   1   7   52.79    2.40
  -2  -1   7   51.79    2.00
  -2  -1   7   45.90    2.50
  -2   1  -7   48.70    2.00
   2  -1  -7   50.59    2.00
  -3  -1  -7   23.70    1.80
   3   1  -7   23.60    1.80
   3  -1   7   25.80    1.60
  -3  -1  -7   25.00    1.40
  -3   1   7   20.90    2.20
  -3   1  -7   22.50    1.50
  -3  -1   7   27.60    1.90
   3  -1  -7   24.80    1.80
  -3   1  -7   23.10    1.60
  -3  -1   7   21.40    2.20
   4   1  -7   12.30    1.50
  -4  -1  -7   15.00    1.50
   4  -1   7   15.00    1.40
  -4  -1  -7   16.90    1.50
  -4   1   7   13.60    2.10
  -4   1  -7   13.60    1.50
  -4   1  -7   16.90    1.30
   4  -1  -7   18.10    2.00
  -4  -1   7   15.80    1.90
  -5   1   7    8.40    1.70
  -5  -1  -7   11.30    1.40
   5  -1   7   10.20    1.20
   5   1  -7    7.70    1.60
  -5  -1  -7   11.90    1.30
  -5   1  -7   12.20    1.40
  -5   1  -7   10.90    1.40
   5  -1  -7    9.60    1.70
  -5  -1   7    8.30    1.70
   6  -1   7   -0.20    1.10
  -6  -1  -7    0.40    1.00
  -6   1   7   -0.60    1.30
   6   1  -7   -1.10    1.60
  -6  -1  -7   -0.30    1.10
  -6   1  -7    1.20    1.00
  -6  -1   7    0.40    1.40
   6  -1  -7    0.60    1.40
  -6  -1   7    0.20    1.40
  -6   1  -7    1.00    1.20
  -7  -1  -7   33.60    3.00
   7   1  -7   36.40    3.20
  -7   1   7   27.40    3.00
  -7  -1  -7   33.90    2.50
  -7  -1   7   36.30    3.20
  -7   1  -7   39.90    2.70
  -7  -1   7   34.60    3.40
   7  -1  -7   34.40    3.50
  -8  -1  -7   39.20    3.30
  -8  -1  -7   44.30    3.10
  -8   1   7   35.50    3.60
   8   1  -7   29.70    3.40
  -8  -1   7   42.30    3.70
  -8  -1   7   34.30    3.90
  -8   1  -7   41.40    3.60
   8  -1  -7   28.90    3.10
  -9   1   7   73.19    5.00
  -9  -1  -7   75.59    4.60
  -9  -1  -7   81.49    4.20
  -9  -1   7   75.39    4.90
  -9   1  -7   81.09    4.80
  -9  -1   7   76.69    5.10
 -10  -1  -7   53.49    4.90
 -10   1   7   60.39    5.10
 -10  -1  -7   49.20    4.10
 -10   1  -7   58.89    4.50
 -10  -1   7   53.49    5.20
 -11   1   7   33.70    4.10
 -11  -1  -7   28.70    3.90
 -11  -1   7   27.70    4.20
 -12  -1  -7    5.60    3.80
 -12   1   7    6.00    3.50
 -12  -1   7    6.40    3.40
 -13   1   7   30.00    4.70
 -13  -1   7   19.50    4.20
 -14   1   7    3.80    5.00
 -14  -1   7    5.80    4.50
 -15   1   7   -2.10    5.90
 -15  -1   7   -2.40    5.10
   0   2  -7   -2.10    0.80
   0  -2  -7    0.00    0.50
   0  -2   7    0.20    0.50
   0  -2  -7   -1.40    0.80
   0   2  -7    0.30    0.50
   0   2   7   -0.10    1.00
   0  -2   7   -0.30    0.90
  -1   2   7    1.10    1.10
  -1  -2  -7    2.50    0.90
   1  -2   7    3.10    0.90
   1   2  -7    2.10    0.60
   1  -2   7    2.50    0.50
  -1  -2  -7    2.40    0.50
  -1  -2   7    0.10    1.00
   1   2   7    3.20    1.10
  -1  -2   7    2.60    0.70
   1  -2  -7    2.50    1.00
  -1   2  -7    4.10    0.90
   2  -2   7  148.69    4.30
  -2  -2  -7  152.58    3.90
  -2  -2  -7  151.58    4.50
   2  -2   7  148.89    3.90
   2   2  -7  145.39    4.20
   2   2   7  159.58    4.70
  -2   2  -7  142.99    4.20
  -2  -2   7  148.99    4.20
  -2  -2   7  148.59    4.80
   2  -2  -7  153.98    4.20
  -2   2  -7  143.69    4.20
  -3  -2  -7   55.39    2.40
   3   2  -7   56.89    2.40
  -3   2   7   56.99    3.00
   3  -2   7   55.39    2.10
   3  -2  -7   56.89    2.40
  -3   2  -7   56.49    2.00
  -3   2  -7   51.59    2.20
  -3  -2   7   52.19    2.90
  -3  -2   7   53.09    2.40
  -4  -2  -7  198.48    5.70
   4  -2   7  192.48    5.30
   4   2  -7  202.48    5.90
  -4  -2  -7  203.88    5.50
  -4   2   7  199.88    6.40
  -4   2  -7  193.48    5.40
   4  -2  -7  207.88    5.90
  -4  -2   7  201.38    6.30
  -4   2  -7  206.18    5.20
   5   2  -7   11.00    1.70
   5  -2   7   12.10    1.40
  -5  -2  -7   14.60    1.70
  -5  -2  -7   10.00    1.30
  -5   2   7   10.20    1.70
  -5   2  -7   11.20    1.00
  -5  -2   7   11.00    1.90
   5  -2  -7   11.80    1.70
  -5  -2   7    5.50    1.50
  -5   2  -7   11.70    1.20
  -6  -2  -7   19.40    2.00
  -6   2   7   17.30    2.10
   6  -2   7   14.60    1.60
   6   2  -7   16.00    2.20
  -6   2  -7   21.90    1.80
  -6   2  -7   17.20    1.90
   6  -2  -7   19.90    2.20
  -6  -2   7   24.20    2.80
  -6  -2   7   17.30    2.20
   7  -2   7    0.80    1.20
  -7   2   7    1.10    1.80
  -7  -2  -7    2.90    1.40
   7   2  -7    1.00    2.20
  -7  -2  -7    3.80    1.50
  -7  -2   7    4.90    2.10
  -7   2  -7    2.10    1.50
   7  -2  -7    4.10    2.10
  -7  -2   7    2.00    1.90
  -7   2  -7    1.90    1.40
   8  -2   7   24.20    2.60
  -8  -2  -7   24.00    2.50
  -8  -2  -7   24.60    2.80
  -8   2   7   20.40    2.80
   8   2  -7   21.70    3.30
  -8   2  -7   23.80    2.40
   8  -2  -7   17.40    2.60
  -8  -2   7   23.20    2.90
  -8  -2   7   20.60    2.80
  -9   2   7    2.90    2.50
  -9  -2  -7    4.30    1.90
  -9  -2  -7    3.00    2.40
  -9  -2   7    2.30    2.20
  -9  -2   7    2.40    2.50
  -9   2  -7    3.70    2.30
 -10   2   7   74.29    5.60
 -10  -2  -7   74.89    4.60
 -10  -2  -7   71.39    5.30
 -10   2  -7   66.89    4.60
 -10  -2   7   79.89    5.20
 -11  -2  -7    7.00    3.50
 -11   2   7    5.60    3.20
 -11  -2  -7    5.20    2.50
 -12   2   7    3.20    6.40
 -12  -2  -7    1.10    3.80
 -12  -2  -7    1.80    2.80
 -12  -2   7    7.50    3.40
 -13   2   7   -2.90    4.40
 -13  -2   7   -1.80    3.80
 -14   2   7   22.10    5.50
 -14  -2   7   28.00    5.30
 -15   2   7   25.40    9.60
 -15  -2   7   15.20    5.70
   0   3   7    1.20    1.20
   0  -3   7    0.00    0.60
   0   3  -7    0.70    0.60
   0  -3   7   -0.60    0.90
   0  -3  -7   -0.20    0.60
   0  -3  -7    1.10    1.00
   0   3  -7    0.40    1.00
  -1  -3  -7  335.47    8.90
   1  -3   7  329.27    8.60
   1   3  -7  333.17    8.30
  -1  -3  -7  328.47    8.20
  -1   3   7  333.07    9.00
   1  -3   7  333.27    8.20
  -1   3  -7  331.47    8.50
  -1   3  -7  334.87    8.10
   1  -3  -7  330.27    9.00
  -1  -3   7  341.97    8.30
   1   3   7  344.47    9.00
  -1  -3   7  335.07    8.90
   1  -3  -7  333.67    8.30
   2   3  -7  185.18    5.20
   2  -3   7  193.38    5.10
  -2  -3  -7  182.48    5.00
   2  -3   7  190.38    4.90
  -2   3   7  192.68    5.90
  -2  -3  -7  197.58    5.60
  -2   3  -7  187.98    5.00
  -2   3  -7  188.48    5.10
  -2  -3   7  190.18    5.20
   2  -3  -7  193.68    5.80
  -2  -3   7  180.08    5.80
   3  -3   7   87.59    2.80
  -3  -3  -7   88.69    3.20
  -3   3   7   85.99    3.60
   3   3  -7   82.89    3.10
   3  -3   7   87.79    2.70
  -3  -3  -7   87.49    2.90
  -3  -3   7   85.39    3.20
  -3   3  -7   86.49    2.80
  -3  -3   7   83.39    3.60
  -3   3  -7   85.69    2.60
  -4  -3  -7   14.50    1.60
  -4   3   7   13.90    1.90
   4   3  -7   16.70    1.70
  -4  -3  -7   18.30    1.90
  -4  -3   7   18.80    2.40
  -4   3  -7   16.30    1.40
  -4   3  -7   17.60    1.10
  -5  -3  -7    5.40    1.10
  -5   3   7    4.80    1.60
   5   3  -7    3.50    1.60
  -5  -3  -7    6.70    1.30
  -5   3  -7    5.90    0.80
  -5  -3   7    4.80    1.50
   5  -3  -7    7.80    1.60
  -5   3  -7    4.90    0.90
  -5  -3   7    3.80    1.60
   6  -3   7   73.79    2.60
  -6   3   7   77.79    4.00
   6   3  -7   83.49    4.20
  -6  -3  -7   78.29    3.20
  -6  -3  -7   85.49    3.60
   6  -3  -7   80.99    4.00
  -6  -3   7   78.39    3.90
  -6  -3   7   79.39    3.90
  -6   3  -7   77.49    2.70
  -6   3  -7   81.79    2.90
  -7  -3  -7  106.39    4.40
   7   3  -7  111.39    5.10
   7  -3   7  111.49    3.40
  -7  -3  -7  110.19    4.20
  -7   3   7  105.69    4.80
   7  -3  -7  110.59    5.20
  -7  -3   7  103.99    4.90
  -7  -3   7  113.59    4.90
  -7   3  -7   98.69    3.50
  -7   3  -7  115.19    3.90
  -8   3   7   70.99    4.40
  -8  -3  -7   65.69    3.60
  -8  -3  -7   73.29    4.00
   8   3  -7   76.49    8.10
   8  -3  -7   67.69    7.30
  -8  -3   7   73.99    4.80
  -8  -3   7   67.49    4.40
  -8   3  -7   73.29    3.40
  -9  -3  -7  170.48    6.20
  -9  -3  -7  170.68    6.70
  -9   3   7  180.58    7.00
  -9   3  -7  174.68    5.60
  -9  -3   7  172.78    7.10
  -9  -3   7  172.38    7.10
 -10  -3  -7    5.00    2.20
 -10  -3  -7    3.60    3.10
 -10   3   7    7.30    2.90
 -10  -3   7    5.00    2.70
 -11  -3  -7  168.38    8.00
 -11   3   7  189.68    8.10
 -11  -3  -7  167.88    7.00
 -11  -3   7  180.28    7.90
 -12  -3  -7    3.30    2.80
 -12   3   7    6.40    5.20
 -12  -3  -7   -2.70    4.10
 -12  -3   7    2.00    3.20
 -13  -3  -7   43.30    6.40
 -13  -3  -7   39.70    4.40
 -13   3   7   56.29    7.20
 -13  -3   7   67.39    6.40
 -14   3   7   28.70    5.80
 -14  -3   7   40.50    5.70
   0  -4  -7    0.30    1.00
   0  -4   7   -0.50    1.00
   0  -4   7   -0.20    0.70
   0   4  -7    1.00    1.00
   0   4  -7    0.80    0.70
   0   4   7    0.60    1.10
   0  -4  -7   -0.50    0.70
  -1   4   7    4.00    1.20
   1  -4   7    2.00    0.90
   1   4  -7    4.00    0.80
  -1  -4  -7    2.60    1.10
   1  -4   7    3.70    0.80
  -1   4  -7    3.70    1.00
   1  -4  -7    2.00    1.10
  -1  -4   7    3.20    1.00
   1   4   7    3.40    1.20
  -1   4  -7    3.00    0.70
  -1  -4   7    1.70    1.10
  -2  -4  -7  545.95   13.10
   2   4  -7  528.75   13.30
   2  -4   7  543.05   13.10
   2  -4   7  545.65   13.10
  -2   4   7  543.85   13.90
  -2  -4  -7  554.14   13.70
  -2  -4   7  542.65   13.80
  -2  -4   7  526.65   13.30
   2  -4  -7  541.35   13.30
  -2   4  -7  531.15   13.00
   2  -4  -7  529.45   13.80
   3  -4   7   -0.10    0.80
   3  -4   7    0.10    0.60
  -3   4   7    0.10    1.30
   3   4  -7   -0.90    1.00
  -3  -4  -7   -0.40    0.70
   3  -4  -7   -0.80    1.00
  -3  -4   7   -1.30    1.30
  -3  -4   7    0.70    1.10
  -3   4  -7    0.90    0.60
  -3   4  -7    1.00    0.80
  -4   4   7    1.40    1.40
  -4  -4  -7    2.80    1.10
  -4  -4  -7    1.20    1.00
   4  -4   7    2.80    1.20
  -4  -4   7    2.40    1.40
  -4   4  -7    2.90    0.50
   5   4  -7    2.70    1.50
  -5  -4  -7    1.40    1.20
  -5  -4  -7    0.80    1.10
  -5   4   7    0.20    1.40
  -5  -4   7    0.40    1.40
  -5  -4   7    0.60    1.40
   5  -4  -7    3.40    1.50
  -6  -4  -7   67.99    3.20
   6   4  -7   66.19    3.90
  -6   4   7   63.29    3.70
  -6  -4  -7   64.79    3.10
  -6  -4   7   60.69    3.80
  -6  -4   7   60.39    3.60
   6  -4  -7   63.99    3.80
  -7   4   7  186.58    6.70
  -7  -4  -7  196.08    6.40
  -7  -4  -7  188.58    6.10
   7   4  -7  191.38    6.90
  -7  -4   7  190.08    7.00
  -7  -4   7  187.28    6.80
   7  -4  -7  194.68    7.00
  -8  -4  -7    1.90    1.60
  -8  -4  -7    0.80    2.10
  -8   4   7    1.00    2.30
  -8  -4   7    1.10    2.10
  -8  -4   7    0.20    2.40
  -9   4   7   18.20    3.00
  -9  -4  -7   10.60    2.90
  -9  -4  -7   15.40    2.30
  -9  -4   7   17.60    3.00
  -9  -4   7   16.40    3.40
 -10  -4  -7  126.89    6.00
 -10  -4  -7  130.09    6.30
 -10   4   7  125.99    6.40
 -10  -4   7  125.39    6.60
 -11  -4  -7   -1.00    3.50
 -11   4   7   -4.40    3.20
 -11  -4  -7   -3.10    2.30
 -11  -4   7    2.70    3.10
 -12  -4  -7  119.39    6.70
 -12  -4  -7  116.49    8.00
 -12   4   7  117.59    7.60
 -12  -4   7  113.49    7.20
 -13  -4  -7    3.40    3.30
 -13  -4  -7    3.90    4.90
 -13   4   7    0.40    4.30
 -13  -4   7    6.00    3.70
 -14  -4  -7   24.30    4.30
 -14  -4   7   33.70    5.30
   0  -5  -7    0.00    0.80
   0  -5  -7    0.90    1.30
   0   5   7   -0.90    1.20
   0  -5   7   -0.10    0.90
   0   5  -7   -0.30    0.80
   0   5  -7    1.20    1.10
   0  -5   7    1.40    0.80
  -1  -5  -7   14.20    1.80
   1   5  -7   13.60    1.60
   1  -5   7   16.20    1.50
  -1   5   7   14.30    2.00
   1  -5   7   18.40    1.50
  -1  -5  -7   14.90    1.40
  -1   5  -7   15.70    1.40
  -1  -5   7   16.80    2.00
   1  -5  -7   17.00    2.10
   1  -5  -7   17.20    1.50
  -1  -5   7   14.90    1.70
  -1   5  -7   16.90    2.00
  -2  -5  -7   65.79    3.00
  -2   5   7   64.99    3.10
   2  -5   7   69.89    2.70
   2  -5   7   64.79    2.40
  -2  -5  -7   67.49    2.60
   2   5  -7   70.09    2.70
  -2  -5   7   68.09    2.80
  -2   5  -7   68.39    2.70
   2  -5  -7   70.99    3.10
  -2  -5   7   70.19    3.30
   2  -5  -7   62.19    2.60
   3  -5   7  180.38    5.20
   3  -5   7  185.28    4.70
   3   5  -7  181.38    5.50
  -3  -5  -7  178.28    5.20
  -3  -5  -7  191.58    5.70
  -3   5   7  185.58    5.90
  -3  -5   7  186.28    6.00
   3  -5  -7  182.38    5.80
   3  -5  -7  182.68    5.40
  -3   5  -7  188.28    4.80
  -3   5  -7  178.08    4.60
   4   5  -7   10.60    1.60
  -4  -5  -7    9.90    1.30
  -4  -5  -7   13.70    1.70
  -4   5   7   12.10    1.80
   4  -5   7   13.20    1.50
  -4  -5   7    9.10    1.90
   4  -5  -7   11.60    1.60
   5   5  -7  189.88    6.20
  -5   5   7  192.58    6.40
  -5  -5  -7  189.98    6.10
  -5  -5  -7  196.58    5.80
  -5  -5   7  186.68    6.50
  -5  -5   7  189.68    6.20
   5  -5  -7  188.18    6.10
  -6  -5  -7    6.40    1.50
  -6   5   7    4.10    1.80
   6   5  -7    5.60    2.10
  -6  -5  -7    6.80    1.70
   6  -5  -7    5.70    2.20
  -6  -5   7    4.30    2.00
  -6  -5   7    4.30    1.80
  -7   5   7   -0.60    1.90
  -7  -5  -7    3.50    1.90
   7   5  -7   -1.30    2.10
  -7  -5  -7    2.70    1.60
   7  -5  -7    1.70    2.30
  -7  -5   7    2.00    2.10
  -7  -5   7   -1.10    2.00
  -8   5   7    9.60    2.60
  -8  -5  -7    7.80    2.00
  -8  -5  -7    9.60    2.40
  -8  -5   7    7.50    2.60
  -8  -5   7   12.80    2.90
  -9  -5  -7   -0.30    2.50
  -9   5   7    1.70    2.40
  -9  -5  -7    1.00    1.90
  -9  -5   7    0.60    2.40
 -10  -5  -7   17.30    3.40
 -10  -5  -7   10.60    3.60
 -10   5   7   15.10    3.30
 -10  -5   7   12.70    3.20
 -11  -5  -7    5.70    3.80
 -11  -5  -7    1.30    2.50
 -11   5   7    5.80    3.30
 -11  -5   7    1.20    3.10
 -12   5   7   40.40    4.90
 -12  -5  -7   39.00    4.10
 -12  -5  -7   25.70    5.10
 -12  -5   7   39.90    4.70
 -13   5   7   48.10    5.70
 -13  -5  -7   51.89    6.30
 -13  -5  -7   50.79    5.00
 -13  -5   7   59.09    6.90
 -14  -5  -7    2.40    6.00
 -14  -5  -7    2.60    3.90
 -14  -5   7   13.70    4.90
   0  -6   7   -0.90    0.90
   0   6  -7    0.00    0.90
   0  -6  -7    0.00    0.80
   0   6   7   -0.10    1.10
   0  -6  -7   -0.60    0.90
   0  -6   7    0.00    0.90
   1  -6   7  244.28    6.70
  -1   6   7  250.17    7.30
   1  -6   7  243.68    6.60
  -1  -6  -7  246.08    7.10
  -1  -6  -7  244.18    6.70
   1   6  -7  238.58    6.70
  -1   6  -7  240.08    6.60
  -1  -6   7  248.18    7.00
  -1   6  -7  236.68    6.70
  -1  -6   7  239.38    6.70
   1  -6  -7  251.27    6.80
   1  -6  -7  244.38    7.10
  -2  -6  -7   89.49    3.30
   2  -6   7   86.49    2.90
  -2   6   7   90.29    3.80
  -2  -6  -7   91.49    3.60
   2  -6   7   90.89    3.30
   2   6  -7   86.59    3.40
   2  -6  -7   89.29    3.40
  -2   6  -7   86.99    3.10
  -2  -6   7   89.89    3.50
   2  -6  -7   88.89    3.60
   3  -6   7  126.79    3.50
  -3  -6  -7  132.99    4.30
  -3   6   7  134.49    4.90
   3  -6   7  130.39    4.30
  -3  -6  -7  134.29    4.60
  -3  -6   7  132.19    4.90
   3  -6  -7  128.99    4.30
   3  -6  -7  129.99    4.60
  -3   6  -7  133.59    3.50
   4  -6   7    0.70    1.30
  -4  -6  -7   -0.90    1.20
   4   6  -7   -1.90    1.30
  -4  -6  -7    0.30    1.00
  -4   6   7   -0.10    1.30
  -4  -6   7    0.70    1.40
   4  -6  -7    1.50    1.20
  -4  -6   7   -0.90    1.60
   4  -6  -7    1.10    1.30
   5   6  -7   22.30    2.50
  -5  -6  -7   20.80    2.40
  -5  -6  -7   20.20    2.00
   5  -6   7   20.90    2.40
  -5   6   7   22.30    2.70
   5  -6  -7   21.30    2.40
  -5  -6   7   21.00    2.40
  -5  -6   7   23.30    2.60
   6   6  -7   70.09    4.40
  -6  -6  -7   73.79    3.50
  -6  -6  -7   77.89    3.90
  -6   6   7   70.09    4.10
   6  -6   7   69.29    3.70
  -6  -6   7   72.99    4.40
  -6  -6   7   74.39    4.30
   6  -6  -7   68.09    3.70
  -7  -6  -7    2.90    1.70
  -7   6   7    4.60    2.10
  -7  -6  -7    2.00    1.90
  -7  -6   7    4.10    2.40
   7  -6  -7    2.00    1.70
  -7  -6   7    3.00    2.10
  -8  -6  -7  121.19    5.10
  -8   6   7  118.69    5.70
  -8  -6  -7  118.89    5.50
  -8  -6   7  117.09    5.90
  -8  -6   7  115.99    6.00
  -9  -6  -7   36.70    4.30
  -9  -6  -7   40.00    3.70
  -9   6   7   38.50    4.40
  -9  -6   7   34.30    3.80
 -10  -6  -7   -3.70    3.00
 -10  -6  -7   -0.20    2.20
 -10   6   7    1.40    2.80
 -10  -6   7    1.10    2.90
 -11  -6  -7    9.00    2.80
 -11   6   7    9.30    3.60
 -11  -6  -7    1.80    4.00
 -11  -6   7    8.30    3.40
 -12  -6  -7    7.80    3.30
 -12   6   7   11.40    4.20
 -12  -6  -7   13.30    4.70
 -12  -6   7   14.00    3.80
 -13  -6  -7   26.20    6.00
 -13  -6  -7   31.50    4.40
 -13  -6   7   53.19    6.40
 -14  -6  -7   -1.30    5.80
 -14  -6  -7   -1.40    4.10
 -14  -6   7    8.90    4.80
   0  -7   7   -0.30    1.10
   0  -7  -7    1.30    1.20
   0  -7   7    1.60    1.10
   0  -7  -7    1.70    1.10
   0   7  -7    3.00    1.10
   1  -7   7   14.70    1.80
   1   7  -7   15.10    1.60
  -1  -7  -7   13.40    1.50
   1  -7   7   14.40    1.60
  -1  -7  -7   11.90    1.60
  -1   7   7   14.80    1.90
   1  -7  -7   13.80    1.60
  -1   7  -7   12.40    1.40
  -1   7  -7   13.30    1.60
  -1  -7   7   15.30    1.70
   1  -7  -7   15.40    1.80
  -1  -7   7   17.00    2.00
  -2  -7  -7   21.10    2.20
  -2  -7  -7   19.50    1.90
  -2   7   7   21.40    2.40
   2   7  -7   20.30    2.20
   2  -7   7   21.80    2.20
   2  -7   7   20.20    1.70
  -2   7  -7   18.90    1.80
  -2  -7   7   19.50    2.20
   2  -7  -7   21.80    2.00
   2  -7  -7   19.00    2.10
   3  -7   7   -0.20    0.70
   3   7  -7   -0.20    1.30
  -3   7   7   -0.70    1.40
  -3  -7  -7    0.00    1.20
   3  -7   7   -2.10    1.20
  -3  -7  -7   -0.30    1.00
  -3  -7   7    2.80    1.40
  -3   7  -7    0.80    0.70
   3  -7  -7    0.30    1.20
  -3  -7   7   -3.20    1.50
   3  -7  -7    2.80    1.20
  -4  -7  -7   15.90    1.80
   4   7  -7   15.30    2.20
   4  -7   7   14.80    1.80
  -4  -7  -7   18.60    2.10
  -4   7   7   16.60    2.10
   4  -7  -7   18.30    2.20
   4  -7  -7   17.00    1.90
  -4  -7   7   15.00    2.20
  -4  -7   7   17.10    2.10
   5   7  -7    4.80    2.00
  -5  -7  -7    5.70    1.80
  -5  -7  -7    5.80    1.40
   5  -7   7    5.80    1.70
  -5   7   7    8.10    2.00
  -5  -7   7    5.10    1.90
  -5  -7   7    6.10    2.10
   5  -7  -7    5.60    1.70
   5  -7  -7    7.20    1.60
   6  -7   7   20.00    2.20
  -6   7   7   22.70    2.60
   6   7  -7   23.00    2.90
  -6  -7  -7   21.40    2.60
  -6  -7  -7   22.00    2.30
  -6  -7   7   17.90    2.90
  -6  -7   7   18.00    2.80
   6  -7  -7   17.40    2.30
  -7  -7  -7    5.80    2.00
  -7   7   7    3.50    2.10
  -7  -7  -7    4.90    2.20
  -7  -7   7    5.60    2.50
   7  -7  -7    6.20    1.80
  -7  -7   7    4.50    2.60
  -8  -7  -7   49.90    4.30
  -8  -7  -7   49.90    3.90
  -8   7   7   50.19    4.30
  -8  -7   7   53.89    4.70
   8  -7  -7   47.60    3.90
  -9  -7  -7   54.99    4.20
  -9   7   7   60.49    4.80
  -9  -7  -7   55.19    4.90
  -9  -7   7   56.79    5.90
   9  -7  -7   55.59    4.30
 -10  -7  -7    0.10    2.20
 -10   7   7    1.70    3.00
  10  -7  -7   -0.80    2.40
 -10  -7   7    0.10    2.90
 -11   7   7    7.10    3.50
 -11  -7  -7    1.50    2.70
 -11  -7  -7   -3.70    3.90
 -11  -7   7    7.70    3.50
  11  -7  -7    2.80    2.80
 -12  -7  -7   -5.50    3.00
 -12   7   7    5.30    4.40
 -12  -7  -7    0.50    4.50
 -12  -7   7    0.50    3.50
 -13  -7  -7   -5.80    5.40
 -13  -7  -7   -1.50    3.50
 -13  -7   7    0.50    4.10
 -14  -7  -7   -5.40    6.00
 -14  -7  -7    0.60    4.40
   0  -8   7   -1.80    1.20
   0  -8  -7    1.90    1.40
   0   8  -7   -2.30    1.10
   0  -8  -7    0.90    1.10
  -1  -8  -7   13.80    1.90
   1  -8   7   14.20    1.60
   1  -8   7   13.30    1.80
   1   8  -7   11.50    1.70
  -1  -8  -7   11.80    1.50
  -1   8  -7   13.60    1.70
   1  -8  -7   12.00    1.70
   1  -8  -7   10.30    1.60
  -2  -8  -7    1.40    1.50
  -2  -8  -7    1.30    1.20
   2   8  -7    3.60    1.60
   2  -8   7    3.90    1.20
   2  -8   7    3.70    1.50
  -2   8   7    4.90    1.50
  -2   8  -7    2.20    1.10
  -2   8  -7    2.90    1.30
  -2  -8   7    0.90    1.40
   2  -8  -7    4.10    1.40
   2  -8  -7    4.10    1.40
  -2  -8   7    3.70    1.70
   3   8  -7   67.39    3.60
   3  -8   7   66.09    2.40
  -3  -8  -7   67.39    3.40
  -3  -8  -7   66.79    3.20
   3  -8   7   67.69    3.50
  -3   8   7   65.89    3.50
   3  -8  -7   71.39    3.50
   3  -8  -7   64.29    3.40
  -3   8  -7   63.19    2.20
  -3  -8   7   67.89    3.80
  -3  -8   7   70.09    3.80
   4   8  -7  138.89    5.30
  -4   8   7  134.89    5.20
   4  -8   7  138.19    5.00
  -4  -8  -7  135.29    4.80
  -4  -8  -7  141.39    5.20
  -4  -8   7  134.19    5.60
   4  -8  -7  138.29    5.10
  -4  -8   7  127.39    5.20
   4  -8  -7  136.29    5.00
   5   8  -7   38.60    3.90
  -5  -8  -7   39.60    3.20
  -5  -8  -7   46.80    3.10
   5  -8   7   45.70    3.40
  -5   8   7   39.10    3.20
  -5  -8   7   41.50    4.00
   5  -8  -7   36.20    3.10
  -5  -8   7   41.50    3.90
   5  -8  -7   39.50    3.10
  -6  -8  -7   27.30    2.60
  -6  -8  -7   25.90    2.90
  -6   8   7   27.30    3.40
  -6  -8   7   24.60    3.20
  -6  -8   7   26.60    3.20
   6  -8  -7   25.10    2.80
   6  -8  -7   27.80    3.20
  -7  -8  -7   29.30    3.30
  -7   8   7   23.20    2.90
  -7  -8  -7   20.90    2.80
  -7  -8   7   20.80    3.10
   7  -8  -7   21.60    2.60
  -8  -8  -7   43.80    4.00
  -8   8   7   44.70    4.30
  -8  -8  -7   47.50    4.40
  -8  -8   7   48.10    4.70
   8  -8  -7   47.60    3.90
  -9   8   7    6.60    2.80
  -9  -8  -7    3.90    2.30
   9  -8  -7    4.20    2.50
  -9  -8   7   11.00    3.10
 -10   8   7   18.80    3.60
 -10  -8  -7    8.80    3.70
 -10  -8  -7   15.80    3.00
 -10  -8   7   20.50    3.80
  10  -8  -7   12.60    3.00
 -11  -8  -7   15.10    3.20
 -11   8   7   17.90    4.10
 -11  -8  -7    9.80    4.40
  11  -8  -7   15.90    3.20
 -11  -8   7   20.20    4.20
 -12  -8  -7    2.80    3.40
 -12  -8  -7   -4.70    4.80
 -12  -8   7    7.30    4.00
 -13  -8  -7   -0.20    3.90
 -13  -8  -7    8.30    6.00
 -13  -8   7    8.10    4.70
   0  -9   7   -0.10    1.60
   0  -9  -7    0.50    1.20
   0  -9  -7   -0.70    1.30
   1   9  -7   12.30    1.90
   1  -9   7   10.80    1.70
  -1  -9  -7   10.30    1.60
  -1  -9  -7   12.10    1.90
   1  -9  -7    8.80    1.70
   1  -9  -7   11.40    1.70
  -1  -9   7    7.00    1.90
  -1   9  -7   12.60    1.80
   2  -9   7  311.37    8.10
   2   9  -7  305.47    8.80
  -2  -9  -7  308.17    8.90
  -2  -9  -7  299.07    8.60
  -2  -9   7  295.07    9.00
  -2   9  -7  281.07    7.80
  -2   9  -7  300.27    8.60
   2  -9  -7  312.47    8.70
   2  -9  -7  308.77    8.80
  -2  -9   7  293.37    8.80
  -3  -9  -7  124.39    4.90
   3   9  -7  125.49    5.10
  -3   9   7  127.69    5.10
  -3  -9  -7  129.29    4.80
   3  -9   7  119.59    3.80
  -3  -9   7  117.49    5.10
   3  -9  -7  128.89    4.80
   3  -9  -7  129.09    4.90
  -3  -9   7  133.29    5.50
  -3   9  -7  124.69    3.70
   4   9  -7   28.20    2.90
  -4  -9  -7   26.90    2.80
  -4   9   7   33.30    3.10
  -4  -9  -7   27.70    3.00
  -4  -9   7   26.30    3.00
   4  -9  -7   29.40    3.10
  -4  -9   7   33.00    3.20
   4  -9  -7   29.80    2.80
  -5  -9  -7    9.20    2.00
  -5  -9  -7    6.50    1.80
  -5   9   7    7.20    2.20
   5  -9  -7    2.70    1.80
   5  -9  -7    9.90    2.00
  -5  -9   7    5.90    2.60
  -5  -9   7   11.00    2.50
  -6  -9  -7   -1.70    1.70
  -6   9   7   -0.20    1.90
  -6  -9  -7   -1.10    2.10
  -6  -9   7    1.40    2.40
   6  -9  -7   -1.00    1.70
   6  -9  -7   -1.70    1.70
  -7  -9  -7   83.89    5.00
  -7   9   7   84.79    4.90
  -7  -9  -7   98.79    4.90
   7  -9  -7   84.49    4.50
  -7  -9   7   96.59    5.80
   7  -9  -7   88.89    5.00
  -8  -9  -7   -1.20    4.50
  -8  -9  -7    4.90    2.50
  -8   9   7    0.60    2.40
  -8  -9   7    4.80    2.90
   8  -9  -7    1.50    2.30
  -9  -9  -7   23.30    3.20
  -9  -9  -7   23.30    3.70
  -9   9   7   20.10    3.30
   9  -9  -7   23.80    3.10
  -9  -9   7   40.30    4.90
 -10  -9  -7   16.60    3.10
 -10  -9  -7   12.20    4.00
 -10   9   7   18.80    3.80
 -10  -9   7   27.90    4.10
  10  -9  -7   15.40    3.20
 -11  -9  -7   -5.70    3.80
 -11  -9  -7    1.60    2.90
 -11  -9   7    6.40    4.00
 -12  -9  -7   11.40    3.90
 -12  -9  -7    9.40    5.30
 -12  -9   7   18.10    4.50
 -13  -9  -7   12.00    4.30
 -13  -9  -7   12.70    6.30
   0 -10  -7   -1.70    1.30
   0 -10  -7   -1.20    1.50
   0  10  -7   -0.90    1.70
   0 -10   7   -2.90    1.60
   0 -10   7   -1.60    1.70
  -1 -10  -7   55.29    3.40
   1 -10   7   50.49    3.50
  -1 -10  -7   52.79    3.30
   1  10  -7   48.00    3.70
  -1  10  -7   55.69    3.60
   1 -10  -7   55.89    3.50
  -1 -10   7   54.59    3.70
  -1 -10   7   50.89    3.70
   1 -10  -7   53.69    3.30
   2  10  -7  206.88    7.10
   2 -10   7  204.98    6.20
  -2 -10  -7  201.98    6.70
  -2 -10  -7  214.58    6.90
   2 -10  -7  205.58    6.80
  -2 -10   7  212.48    7.10
  -2  10  -7  201.28    6.80
  -2 -10   7  208.38    7.20
   2 -10  -7  212.28    6.80
  -3 -10  -7    6.90    1.90
   3 -10   7    9.60    1.40
  -3 -10  -7    8.90    1.90
  -3 -10   7    8.20    2.30
  -3 -10   7    8.10    2.50
   3 -10  -7   11.30    2.10
   3 -10  -7    6.60    1.70
  -4 -10  -7   53.79    3.60
  -4 -10  -7   53.49    3.70
  -4  10   7   51.39    3.80
   4 -10  -7   51.59    3.70
   4 -10  -7   51.39    3.60
  -4 -10   7   55.19    4.50
  -4 -10   7   46.20    4.30
  -5 -10  -7   19.20    2.60
  -5  10   7   18.50    2.60
  -5 -10  -7   17.80    2.60
   5 -10  -7   18.90    2.40
   5 -10  -7   19.20    2.50
  -5 -10   7   15.90    3.10
  -6  10   7   37.50    3.80
  -6 -10  -7   40.60    3.60
  -6 -10  -7   32.00    3.80
  -6 -10   7   37.60    4.40
   6 -10  -7   44.20    3.70
   6 -10  -7   35.70    3.80
  -7 -10  -7   43.80    4.30
  -7  10   7   37.90    4.20
   7 -10  -7   47.00    3.90
  -7 -10   7   41.00    4.60
   7 -10  -7   41.80    4.20
  -8 -10  -7    4.60    2.40
  -8 -10  -7    4.00    2.90
  -8  10   7    8.50    2.80
   8 -10  -7    3.20    2.70
  -8 -10   7    6.70    3.20
   8 -10  -7    2.20    2.30
  -9  10   7   10.90    3.20
  -9 -10  -7    9.70    2.90
  -9 -10  -7    4.70    3.50
   9 -10  -7    4.70    3.10
   9 -10  -7   10.50    2.90
  -9 -10   7   10.20    3.50
 -10 -10  -7    3.50    2.90
 -10  10   7    2.10    4.80
 -10 -10  -7   -2.80    3.60
  10 -10  -7    3.20    3.40
 -11 -10  -7   -3.50    4.20
 -11 -10  -7    7.40    3.50
 -11 -10   7   13.90    4.10
 -12 -10  -7    3.70    5.30
 -12 -10  -7    5.30    3.70
 -12 -10   7    7.10    4.50
   0 -11  -7   -0.40    1.70
   0 -11  -7   -0.80    1.70
   0 -11   7   -0.90    2.40
   0 -11   7    0.30    2.00
  -1 -11  -7  156.88    5.80
  -1 -11  -7  158.28    5.90
   1 -11   7  148.49    5.70
  -1 -11   7  153.28    6.50
  -1 -11   7  157.58    6.10
   1 -11  -7  160.78    6.00
   1 -11  -7  159.68    5.80
  -2 -11  -7   41.80    3.40
   2 -11   7   37.60    3.30
  -2 -11  -7   40.30    3.40
  -2 -11   7   44.10    3.90
   2 -11  -7   40.70    3.60
   2 -11  -7   42.30    3.40
   3 -11   7   68.39    3.30
  -3 -11  -7   69.39    4.10
  -3 -11  -7   65.49    4.00
   3 -11  -7   69.19    4.20
   3 -11  -7   69.59    4.10
  -3 -11   7   72.59    4.70
  -4 -11  -7    1.80    2.00
  -4 -11  -7    0.70    2.00
   4 -11  -7    3.40    2.00
   4 -11  -7    1.70    1.90
  -4 -11   7    5.30    2.60
  -5 -11  -7    4.00    1.90
  -5  11   7    7.10    2.40
  -5 -11  -7    5.60    2.40
  -5 -11   7    6.20    2.90
   5 -11  -7    6.20    2.20
   5 -11  -7    6.80    2.20
  -6  11   7   22.60    3.10
  -6 -11  -7   20.10    3.90
  -6 -11  -7   21.30    2.80
  -6 -11   7   23.20    3.60
   6 -11  -7   22.40    2.80
   6 -11  -7   22.70    2.90
  -7  11   7   30.60    3.50
  -7 -11  -7   23.90    3.50
  -7 -11  -7   21.90    3.30
   7 -11  -7   23.90    3.10
   7 -11  -7   27.00    3.10
  -7 -11   7   24.00    3.70
  -8 -11  -7   47.40    5.10
  -8 -11  -7   67.09    5.30
  -8  11   7   53.69    5.10
  -8 -11   7   60.79    5.70
   8 -11  -7   59.19    5.30
   8 -11  -7   53.49    4.70
  -9 -11  -7   15.40    3.30
  -9  11   7    9.90    3.50
  -9 -11  -7    5.20    3.60
  -9 -11   7   15.40    4.00
   9 -11  -7    8.40    3.10
   9 -11  -7    9.30    3.40
 -10 -11  -7   -5.50    2.90
 -10 -11  -7   -4.60    3.90
 -10 -11   7    9.80    3.70
  10 -11  -7    1.20    3.50
 -11 -11  -7    4.50    4.70
 -11 -11  -7   12.80    3.70
 -11 -11   7   24.70    4.70
 -12 -11  -7   -2.40    5.10
 -12 -11  -7    0.40    3.80
   0 -12  -7   -0.60    1.80
   0 -12  -7   -0.90    1.90
   0 -12   7    1.10    2.20
   1 -12   7   54.79    4.00
  -1 -12  -7   54.99    3.90
  -1 -12  -7   64.29    4.20
   1 -12  -7   71.99    4.20
  -1 -12   7   63.39    4.60
   1 -12  -7   63.69    4.20
  -2 -12  -7   -1.10    2.00
   2 -12   7    0.60    2.00
  -2 -12  -7   -2.50    1.80
   2 -12  -7   -0.70    1.80
  -2 -12   7   -1.60    2.50
   2 -12  -7   -1.80    2.00
  -3 -12  -7    4.70    2.10
  -3 -12  -7    6.00    2.10
  -3 -12   7    7.20    2.80
   3 -12  -7    6.90    2.30
   3 -12  -7    2.20    2.10
  -4 -12  -7   23.80    2.90
  -4 -12  -7   22.50    3.00
  -4 -12   7   26.80    3.60
   4 -12  -7   24.80    2.90
   4 -12  -7   27.00    3.00
  -5 -12  -7   -0.10    1.90
  -5 -12  -7   -4.00    2.10
   5 -12  -7    1.70    2.20
   5 -12  -7   -0.70    2.10
  -5 -12   7    6.20    2.90
  -6 -12  -7   51.39    4.70
  -6 -12  -7   65.59    5.30
   6 -12  -7   54.59    4.90
   6 -12  -7   60.29    4.30
  -6 -12   7   57.49    5.40
  -7 -12  -7   10.00    2.90
  -7  12   7   14.30    3.20
  -7 -12  -7    5.60    3.20
   7 -12  -7   12.00    3.10
  -7 -12   7   16.80    3.60
   7 -12  -7   11.10    2.90
  -8  12   7    1.60    3.00
  -8 -12  -7    2.40    3.20
  -8 -12  -7    5.90    3.00
  -8 -12   7    3.40    3.60
   8 -12  -7    3.60    3.30
   8 -12  -7   -2.60    2.80
  -9 -12  -7    2.70    3.20
  -9 -12  -7   -3.50    3.70
   9 -12  -7   -3.10    3.40
  -9 -12   7    4.50    3.80
 -10 -12  -7   -0.30    3.20
 -10 -12  -7   -1.80    4.20
 -10 -12   7    9.20    4.20
 -11 -12  -7   -9.40    4.70
 -11 -12  -7    0.00    3.80
   0 -13  -7   -2.80    1.90
   0 -13  -7   -2.20    2.00
   0 -13   7    3.40    2.40
   1 -13   7   49.90    4.20
  -1 -13  -7   51.79    4.30
  -1 -13  -7   55.09    4.30
   1 -13  -7   46.70    4.20
   1 -13  -7   54.49    3.90
  -1 -13   7   50.09    4.80
  -2 -13  -7   -0.80    2.10
  -2 -13  -7    2.20    2.20
   2 -13  -7    4.50    2.40
  -2 -13   7    3.80    2.70
   2 -13  -7    0.90    2.40
  -3 -13  -7  246.38    8.40
   3 -13  -7  248.58    8.60
  -3 -13   7  253.67    9.20
   3 -13  -7  244.58    8.20
  -4 -13  -7    2.00    2.40
  -4 -13  -7    1.40    2.30
   4 -13  -7   -0.60    2.40
   4 -13  -7    2.30    2.30
  -4 -13   7    4.90    3.20
  -5 -13  -7  108.89    5.70
  -5 -13  -7   93.69    5.60
   5 -13  -7  102.39    5.40
   5 -13  -7  101.19    5.80
  -6 -13  -7    3.40    3.00
  -6 -13  -7    5.00    2.70
  -6 -13   7    6.00    3.40
   6 -13  -7    9.30    3.10
   6 -13  -7    3.40    2.60
  -7 -13  -7    3.10    3.30
  -7 -13  -7    4.40    2.80
   7 -13  -7    1.90    2.80
  -7 -13   7    8.90    3.90
  -8 -13  -7    0.40    3.50
  -8 -13  -7   -0.90    3.10
  -8 -13   7    0.90    3.60
   8 -13  -7    3.80    3.60
  -9 -13  -7   14.40    3.90
  -9 -13  -7    3.50    4.00
   9 -13  -7   16.90    4.20
  -9 -13   7   18.70    4.40
 -10 -13  -7  -10.20    4.30
 -10 -13  -7   -0.20    3.70
 -10 -13   7   12.40    4.60
 -11 -13  -7   -0.10    4.20
   0 -14   7    1.10    2.70
   0 -14  -7   -3.10    2.20
   0 -14  -7    0.20    2.30
   1 -14   7   11.70    2.80
  -1 -14  -7   14.20    2.70
   1 -14  -7   10.90    2.80
   1 -14  -7    8.10    2.50
  -1 -14   7   10.20    3.10
  -2 -14  -7    8.70    2.80
  -2 -14  -7    9.90    2.60
   2 -14  -7    7.20    2.70
  -2 -14   7   11.10    3.30
   2 -14  -7   10.60    2.60
  -3 -14  -7   15.90    3.00
  -3 -14  -7    8.80    4.90
  -3 -14   7   17.00    3.60
   3 -14  -7   14.30    3.10
   3 -14  -7   15.40    2.90
  -4 -14  -7    4.00    2.90
  -4 -14  -7    7.10    2.90
  -4 -14   7    9.00    4.20
   4 -14  -7    3.70    2.70
   4 -14  -7    5.60    3.20
  -5 -14  -7    7.10    2.70
  -5 -14  -7    2.90    2.90
   5 -14  -7    7.10    2.70
  -5 -14   7   10.10    3.60
   5 -14  -7   -2.00    3.40
  -6 -14  -7    4.00    3.00
  -6 -14  -7   -5.20    3.10
   6 -14  -7   -2.30    3.00
   6 -14  -7    4.20    3.00
  -6 -14   7    7.50    3.70
  -7 -14  -7   17.80    3.90
  -7 -14  -7   15.90    3.50
   7 -14  -7   20.50    3.80
  -7 -14   7   21.80    4.30
  -8 -14  -7    8.00    3.70
  -8 -14  -7    4.30    4.00
  -8 -14   7   17.00    4.40
   8 -14  -7    5.50    3.90
  -9 -14  -7    1.40    3.70
  -9 -14  -7   -7.80    4.20
  -9 -14   7    2.90    4.40
 -10 -14  -7   37.10    5.10
   0 -15  -7   -1.40    3.40
   0 -15  -7   -1.40    2.50
   0 -15   7    5.20    3.10
  -1 -15  -7  124.39    6.30
  -1 -15  -7  117.69    6.10
   1 -15  -7   96.49    9.30
   1 -15  -7  110.49    5.80
  -1 -15   7  117.29    6.60
  -2 -15  -7   10.00    3.10
  -2 -15  -7    7.90    2.90
   2 -15  -7    3.60    4.10
  -2 -15   7    7.50    3.60
  -3 -15  -7   24.10    3.60
  -3 -15  -7   23.50    3.50
  -3 -15   7   20.60    4.20
   3 -15  -7   24.00    3.90
   3 -15  -7   22.00    4.00
  -4 -15  -7   10.90    3.50
  -4 -15  -7    7.30    3.10
   4 -15  -7   10.90    3.30
  -4 -15   7   10.70    4.00
   4 -15  -7    4.20    3.00
  -5 -15  -7    5.40    2.80
  -5 -15  -7    1.30    3.30
  -5 -15   7   12.40    3.90
   5 -15  -7    2.50    3.40
   5 -15  -7    5.00    3.00
  -6 -15  -7   30.00    4.40
  -6 -15  -7   28.10    4.20
   6 -15  -7   25.00    3.90
  -6 -15   7   34.70    5.00
   6 -15  -7   26.00    4.20
  -7 -15  -7   41.20    4.70
  -7 -15  -7   31.00    4.80
  -7 -15   7   55.49    6.80
   7 -15  -7   35.60    4.60
  -8 -15  -7    1.40    3.70
  -8 -15   7   15.40    4.60
  -9 -15  -7   10.70    4.60
  -9 -15   7   26.10    5.70
   0 -16  -7    1.00    2.80
   0 -16  -7   -0.80    2.90
  -1 -16  -7   30.30    3.80
  -1 -16  -7   31.60    3.90
   1 -16  -7   29.80    3.70
  -1 -16   7   34.10    4.60
   1 -16  -7   32.70    4.10
  -2 -16  -7    5.00    3.00
  -2 -16  -7    6.60    3.20
   2 -16  -7    0.90    2.90
   2 -16  -7    4.00    3.20
  -2 -16   7    2.60    3.90
  -3 -16  -7    9.30    3.50
  -3 -16  -7   10.30    3.40
  -3 -16   7   12.90    4.30
   3 -16  -7    9.50    3.40
   3 -16  -7    6.30    3.30
  -4 -16  -7    6.10    3.40
  -4 -16  -7    3.90    3.40
  -4 -16   7    4.50    4.30
   4 -16  -7    4.40    3.30
   4 -16  -7    4.30    3.60
  -5 -16  -7    3.20    3.20
  -5 -16  -7   -2.50    3.30
   5 -16  -7    4.80    3.30
  -5 -16   7    8.60    4.20
   5 -16  -7    0.50    3.80
  -6 -16  -7   32.90    5.10
  -6 -16  -7   39.70    5.00
  -6 -16   7   43.90    5.50
   6 -16  -7   31.50    4.90
  -7 -16  -7    2.20    4.30
  -7 -16  -7   -2.90    3.50
  -7 -16   7   12.20    4.80
  -8 -16  -7   -6.80    4.30
  -8 -16   7    9.00    5.00
   0 -17  -7   -2.10    3.10
   0 -17  -7   -2.70    3.20
  -1 -17  -7   28.40    4.20
  -1 -17  -7   28.80    4.30
   1 -17  -7   32.70    4.40
   1 -17  -7   37.10    4.40
  -2 -17  -7    8.20    3.70
  -2 -17  -7    2.30    3.50
  -2 -17   7    5.10    4.30
   2 -17  -7    5.10    3.30
   2 -17  -7    4.60    3.90
  -3 -17  -7   49.10    5.80
  -3 -17  -7   64.79    6.90
   3 -17  -7   51.59    5.20
   3 -17  -7   44.00    5.70
  -3 -17   7   52.99    5.80
  -4 -17  -7   18.60    4.50
  -4 -17  -7    8.90    4.20
  -4 -17   7   25.20    5.20
   4 -17  -7   13.00    4.00
   4 -17  -7   15.40    4.60
  -5 -17  -7    7.80    3.60
  -5 -17  -7   -2.60    4.10
  -5 -17   7    6.80    4.60
   5 -17  -7    1.00    4.40
  -6 -17  -7   12.40    4.80
  -6 -17  -7   19.00    4.70
  -6 -17   7   30.10    5.70
  -7 -17   7   86.49    9.00
   0 -18  -7    4.10    3.80
   0 -18  -7    1.50    3.80
  -1 -18  -7    1.70    4.10
  -1 -18  -7   -0.70    3.90
   1 -18  -7    3.70    3.70
   1 -18  -7    5.90    4.00
  -2 -18  -7    6.20    4.20
  -2 -18  -7   14.40    4.30
   2 -18  -7   18.30    4.50
   2 -18  -7   11.90    4.20
  -3 -18  -7    5.10    4.30
  -3 -18  -7   14.40    4.30
   3 -18  -7   17.10    4.70
  -3 -18   7   17.00    5.60
   3 -18  -7    7.70    4.10
  -4 -18  -7   36.80    5.20
  -4 -18  -7   23.50    4.90
  -4 -18   7   45.30    6.00
  -5 -18  -7   17.10    4.70
  -5 -18   7   26.10    5.90
   0 -19  -7    1.60    4.40
   0 -19  -7   -6.30    4.60
  -1 -19  -7   27.50    5.50
  -1 -19  -7   16.20    5.00
   1 -19  -7   24.70    8.40
   1 -19  -7   23.80    5.10
  -2 -19  -7    1.40    4.40
   2 -19  -7    5.90    4.50
   0   0   8  593.54   14.90
   0   0  -8  594.44   14.80
  -1   0  -8   11.90    1.40
   1   0  -8   12.20    1.10
  -1   0   8   12.10    1.50
   1   0   8   14.20    1.70
   2   0  -8  445.16   10.70
  -2   0   8  429.26   11.50
  -2   0  -8  433.86   11.10
   2   0   8  442.26   11.20
   3   0   8   17.30    1.90
  -3   0   8   15.40    1.60
  -3   0  -8   18.50    1.50
   3   0  -8   18.90    1.70
  -4   0  -8   70.99    2.60
  -4   0   8   69.39    3.40
  -4   0   8   64.99    2.80
   4   0  -8   70.79    3.00
  -5   0   8   51.39    3.10
   5   0  -8   47.90    3.00
  -5   0  -8   55.39    2.40
  -6   0   8  345.47    9.80
  -6   0   8  360.26   10.40
   6   0  -8  355.46   10.00
  -6   0  -8  361.06    9.30
  -7   0   8   28.10    2.70
   7   0  -8   25.60    2.90
  -7   0  -8   26.10    2.50
  -7   0   8   20.10    2.50
  -8   0   8    2.80    2.40
  -8   0   8    3.90    2.10
  -9   0   8   88.99    5.20
  -9   0  -8   88.49    4.90
 -10   0  -8  257.57    8.70
 -10   0   8  254.67    9.40
 -11   0  -8  120.39    7.20
 -12   0   8   -0.20    3.30
 -13   0   8   11.40    4.40
 -14   0   8  170.88   10.10
   0   1   8 1186.08   29.40
   0  -1  -8 1202.28   29.30
   0  -1   8 1221.18   29.30
   0  -1  -8 1284.07   28.40
   1  -1   8    1.20    1.00
   1   1  -8    1.10    0.60
  -1   1   8    1.70    1.20
  -1  -1  -8    1.20    0.90
  -1   1  -8   -0.80    1.00
  -1   1  -8    1.50    0.90
   1   1   8    1.30    1.00
  -1  -1   8    1.10    1.10
   1  -1  -8    1.70    0.70
  -1  -1   8    2.50    0.70
  -2   1   8   81.99    3.50
   2   1  -8   82.49    2.70
   2  -1   8   79.49    3.00
  -2  -1  -8   80.79    3.10
   2   1   8   77.99    3.10
   2  -1  -8   82.49    2.70
  -2   1  -8   77.59    3.00
  -2  -1   8   81.79    2.70
  -2   1  -8   80.39    2.80
  -2  -1   8   75.69    3.30
  -3   1   8   26.00    2.50
   3  -1   8   29.20    1.70
  -3  -1  -8   30.80    1.40
   3   1  -8   30.30    1.90
  -3  -1  -8   32.50    1.90
   3  -1  -8   29.90    2.00
  -3  -1   8   30.60    2.00
  -3   1  -8   30.10    1.70
  -3   1  -8   28.10    1.90
  -4   1   8   15.30    1.90
  -4  -1  -8   17.80    1.40
   4   1  -8   14.10    1.60
   4  -1   8   13.40    1.60
  -4  -1  -8   11.50    1.50
  -4   1  -8   12.10    1.40
  -4  -1   8   15.00    1.50
  -4  -1   8   15.70    1.90
  -4   1  -8   13.90    1.30
   4  -1  -8   13.60    1.60
  -5  -1  -8   77.79    2.90
  -5   1   8   78.09    3.80
   5  -1   8   71.69    2.90
  -5  -1  -8   76.79    2.90
   5   1  -8   71.19    3.40
  -5   1  -8   80.59    2.80
   5  -1  -8   74.69    3.30
  -5   1  -8   71.39    3.10
  -6  -1  -8   17.20    1.70
  -6   1   8   17.40    2.20
  -6  -1  -8   18.20    1.90
   6   1  -8   13.50    2.20
  -6   1  -8   17.30    1.90
   6  -1  -8   16.30    2.10
  -6  -1   8   13.00    2.00
  -6  -1   8   15.10    2.00
  -7   1   8    2.90    1.90
   7   1  -8   -0.20    2.30
  -7  -1  -8    5.20    1.60
  -7  -1  -8    5.10    1.40
  -7   1  -8    5.30    1.50
  -7  -1   8    5.10    1.90
  -7  -1   8    7.10    2.10
   7  -1  -8    3.00    2.10
  -8  -1  -8  166.38    5.80
  -8   1   8  167.28    6.50
  -8  -1  -8  164.78    5.60
  -8  -1   8  157.68    6.60
  -8   1  -8  164.78    5.70
  -8  -1   8  146.49    6.20
  -9  -1  -8   52.39    4.30
  -9  -1  -8   47.10    3.60
  -9   1   8   55.39    4.40
  -9   1  -8   47.10    4.30
  -9  -1   8   55.19    4.50
 -10   1   8   20.30    3.30
 -10  -1  -8   17.40    3.30
 -10   1  -8   14.60    3.00
 -10  -1   8   19.10    3.30
 -11  -1  -8   44.70    4.50
 -11   1   8   55.69    5.60
 -11  -1   8   38.80    4.90
 -12   1   8    6.00    3.60
 -12  -1   8    0.10    3.50
 -13   1   8   31.10    5.30
 -13  -1   8   33.00    4.90
 -14   1   8    4.40    5.20
 -14  -1   8    2.30    5.00
   0   2   8  318.97    8.60
   0   2  -8  307.47    7.50
   0  -2   8  309.77    8.40
   0  -2  -8  307.37    7.50
   0  -2  -8  308.37    8.40
   0  -2   8  313.27    7.50
  -1   2   8   -1.10    1.10
   1  -2   8    0.20    0.40
  -1  -2  -8    0.70    0.80
   1  -2   8   -1.10    0.90
   1   2  -8    0.00    0.60
  -1  -2  -8    0.00    0.50
   1  -2  -8    0.60    0.60
   1   2   8    1.50    1.00
  -1  -2   8    1.60    0.70
  -1   2  -8    1.50    0.90
  -1  -2   8    0.00    1.00
   1  -2  -8   -0.30    0.90
   2  -2   8  660.93   15.70
  -2   2   8  680.83   16.90
   2   2  -8  655.03   16.00
  -2  -2  -8  627.64   15.90
   2  -2   8  665.83   16.20
  -2  -2  -8  669.33   16.50
   2  -2  -8  695.03   16.10
  -2  -2   8  659.63   16.80
  -2   2  -8  653.83   16.30
  -2   2  -8  662.53   16.20
   2   2   8  685.73   16.60
  -2  -2   8  692.83   16.10
  -3   2   8   -0.40    1.20
  -3  -2  -8   -0.50    0.70
  -3  -2  -8    0.80    1.00
   3  -2   8   -0.60    0.80
   3   2  -8   -0.30    0.90
  -3   2  -8   -0.80    1.00
   3  -2  -8    1.50    1.00
  -3  -2   8   -0.40    1.10
  -3   2  -8    0.00    0.70
  -3  -2   8   -0.10    1.00
   4   2  -8  174.68    5.40
  -4   2   8  181.48    6.00
  -4  -2  -8  177.68    5.30
  -4  -2  -8  175.98    4.90
   4  -2  -8  181.28    5.40
  -4   2  -8  167.98    5.00
  -4  -2   8  178.88    5.40
  -4   2  -8  179.28    4.80
  -4  -2   8  180.18    6.00
  -5  -2  -8   13.80    1.40
   5  -2   8   12.30    1.60
   5   2  -8   13.50    1.90
  -5  -2  -8   15.30    1.90
  -5   2   8   16.30    2.20
  -5   2  -8   16.30    1.50
  -5   2  -8   14.10    1.50
  -5  -2   8   11.40    1.80
   6  -2   8   73.69    2.90
  -6  -2  -8   80.59    3.30
   6   2  -8   76.79    4.10
  -6  -2  -8   76.69    3.20
  -6   2   8   83.69    4.10
   6  -2  -8   74.09    3.90
  -6   2  -8   69.69    3.00
  -6  -2   8   72.09    3.80
  -6   2  -8   80.49    2.80
  -6  -2   8   78.69    4.10
   7  -2   8    1.00    1.30
  -7  -2  -8    1.10    1.30
  -7  -2  -8    1.10    1.50
   7   2  -8   -1.20    2.00
  -7   2   8    2.40    1.90
  -7  -2   8    4.90    2.00
  -7   2  -8   -0.40    1.40
   7  -2  -8   -3.00    2.20
  -7  -2   8    2.10    1.80
  -7   2  -8    2.80    1.50
  -8  -2  -8  417.86   11.30
  -8   2   8  416.66   12.20
  -8  -2  -8  412.96   11.40
  -8   2  -8  418.46   11.00
  -8  -2   8  407.76   12.30
  -8  -2   8  411.76   11.90
  -9  -2  -8   53.19    3.70
  -9   2   8   62.19    5.00
  -9  -2  -8   53.99    4.30
  -9  -2   8   58.39    4.70
  -9   2  -8   57.59    4.30
 -10  -2  -8    9.20    3.10
 -10   2   8   11.50    3.20
 -10  -2   8   12.50    3.30
 -11  -2  -8    5.10    2.30
 -11   2   8    4.00    3.60
 -11  -2  -8    5.50    3.60
 -11  -2   8    0.80    3.10
 -12  -2  -8  143.09    8.40
 -12   2   8  161.78    8.40
 -12  -2   8  142.49    8.00
 -13   2   8   14.70    4.70
 -13  -2   8   21.70    4.80
 -14   2   8  141.59    9.70
 -14  -2   8  127.59    8.80
   0   3  -8   22.40    1.20
   0  -3  -8   22.10    1.90
   0  -3   8   18.00    1.80
   0   3   8   23.60    2.10
   0  -3   8   19.80    1.30
  -1   3   8  708.73   17.70
   1   3  -8  684.73   16.60
   1  -3   8  697.93   16.50
   1  -3   8  716.03   17.10
  -1  -3  -8  701.83   17.40
  -1  -3  -8  647.84   16.80
   1  -3  -8  696.73   17.50
  -1  -3   8  720.93   16.70
  -1   3  -8  677.13   17.00
  -1  -3   8  718.13   17.40
   1  -3  -8  707.03   16.70
   1   3   8  702.73   17.40
   2   3  -8    1.10    0.80
   2  -3   8    0.20    0.80
  -2  -3  -8    0.20    0.60
  -2   3   8    1.30    1.40
  -2  -3  -8    0.50    0.80
   2  -3   8   -0.40    0.70
  -2   3  -8    0.70    0.70
  -2  -3   8   -0.10    1.00
   2   3   8    1.40    1.00
  -2   3  -8    1.30    0.90
  -2  -3   8   -0.90    0.90
   2  -3  -8   -1.10    1.10
   3   3  -8   66.99    2.80
  -3  -3  -8   71.79    2.50
   3  -3   8   72.89    2.50
  -3  -3  -8   72.39    3.00
   3  -3   8   70.09    2.40
  -3   3   8   68.99    3.40
  -3  -3   8   72.59    2.90
  -3  -3   8   71.29    3.40
  -3   3  -8   71.79    2.70
  -3   3  -8   70.29    2.40
   3  -3  -8   80.39    3.00
  -4   3   8  184.98    6.10
  -4  -3  -8  190.18    5.60
  -4  -3  -8  176.18    5.10
   4   3  -8  185.78    5.60
  -4  -3   8  188.68    6.10
  -4   3  -8  185.08    4.90
   4  -3  -8  188.38    5.60
  -4  -3   8  182.58    5.60
  -4   3  -8  175.28    5.00
  -5   3   8    0.90    1.50
  -5  -3  -8    0.40    0.90
  -5  -3  -8    2.10    1.30
  -5   3  -8    1.30    0.80
   5  -3  -8    1.60    1.60
  -5  -3   8    1.50    1.60
  -5   3  -8    2.30    1.10
  -6  -3  -8  209.88    6.30
   6   3  -8  206.28    6.70
  -6   3   8  203.98    7.00
  -6  -3  -8  198.88    6.00
   6  -3   8  200.98    5.50
  -6   3  -8  192.88    5.60
   6  -3  -8  210.18    6.80
  -6  -3   8  201.08    7.00
  -6  -3   8  204.38    6.70
  -6   3  -8  214.48    5.50
  -7  -3  -8   20.40    2.30
   7   3  -8   26.50    3.00
  -7  -3  -8   24.50    2.50
  -7   3   8   21.60    2.80
   7  -3   8   18.00    1.90
   7  -3  -8   17.50    2.60
  -7   3  -8   25.00    2.50
  -7   3  -8   23.50    2.10
  -7  -3   8   25.50    2.70
  -7  -3   8   20.70    2.80
  -8   3   8    6.40    2.50
  -8  -3  -8    8.10    1.80
  -8  -3  -8    8.30    2.20
  -8   3  -8    8.30    1.90
  -8  -3   8    6.40    2.30
  -8  -3   8   12.10    2.90
  -9  -3  -8  261.47    8.10
  -9  -3  -8  259.37    8.50
  -9   3   8  271.97    9.30
  -9  -3   8  243.88    9.00
 -10  -3  -8    7.70    3.00
 -10   3   8    9.20    3.10
 -10  -3  -8    6.40    2.60
 -10  -3   8    6.20    2.90
 -11  -3  -8    6.60    3.70
 -11   3   8   11.00    3.50
 -11  -3  -8   10.80    2.60
 -11  -3   8   18.50    3.30
 -12   3   8    5.20    4.00
 -12  -3  -8   -1.10    4.20
 -12  -3  -8   -0.20    2.70
 -12  -3   8   10.40    3.90
 -13   3   8    8.60    4.60
 -13  -3  -8    2.70    3.30
 -13  -3   8    7.40    4.20
 -14   3   8   22.80    5.70
 -14  -3   8   18.40    5.20
   0   4   8 7534.75  172.78
   0  -4   8 7437.86  172.18
   0  -4   8 7575.04  173.28
   0  -4  -8 7316.27  172.58
   0  -4  -8 7458.05  172.38
   0   4  -8 7361.66  171.68
   1  -4   8  363.76    9.00
   1   4  -8  371.66    9.20
  -1  -4  -8  354.26    9.80
  -1   4   8  368.16   10.00
   1  -4   8  361.16    9.40
  -1  -4  -8  367.96    9.10
   1  -4  -8  371.46    9.20
   1  -4  -8  365.46    9.90
  -1  -4   8  363.76    9.70
  -1   4  -8  367.76    9.00
   1   4   8  355.76    9.90
  -1  -4   8  374.16    9.20
  -1   4  -8  344.77    9.30
  -2  -4  -8   17.30    1.90
   2  -4   8   16.00    1.50
   2   4  -8   16.30    1.60
  -2  -4  -8   18.60    1.40
   2  -4   8   18.60    1.60
  -2   4   8   17.30    2.00
   2  -4  -8   21.90    2.00
  -2  -4   8   19.90    1.80
  -2  -4   8   15.30    2.00
  -2   4  -8   22.60    1.80
   2  -4  -8   16.30    1.50
   3  -4   8    4.50    0.80
   3  -4   8    2.80    1.00
  -3   4   8    3.70    1.50
  -3  -4  -8    2.70    1.10
  -3  -4  -8    4.00    0.80
   3   4  -8    3.30    1.10
  -3   4  -8    3.70    0.70
   3  -4  -8    2.90    1.20
  -3   4  -8    4.10    1.00
  -3  -4   8    5.40    1.60
  -3  -4   8    5.60    1.30
  -4  -4  -8  551.24   14.00
  -4  -4  -8  575.94   14.50
   4   4  -8  551.24   14.30
   4  -4   8  578.44   14.00
  -4   4   8  575.74   15.00
   4  -4  -8  568.54   14.40
  -4   4  -8  577.84   13.50
  -4  -4   8  553.94   14.90
  -4   4  -8  567.14   13.60
   4  -4  -8  573.24   14.80
  -4  -4   8  559.24   14.40
  -5  -4  -8  239.78    6.70
   5   4  -8  231.58    7.30
  -5  -4  -8  243.78    7.10
  -5   4   8  240.98    7.70
  -5   4  -8  239.88    6.00
  -5  -4   8  233.08    7.60
  -5   4  -8  241.58    5.90
   5  -4  -8  240.68    7.20
  -6  -4  -8   72.09    3.20
  -6  -4  -8   69.49    3.50
   6   4  -8   68.99    4.10
  -6   4   8   67.89    4.20
  -6  -4   8   66.29    3.80
  -6  -4   8   67.69    4.00
   6  -4  -8   72.19    4.10
  -7  -4  -8    1.10    1.80
   7   4  -8   -1.10    2.10
  -7  -4  -8    1.50    1.30
  -7   4   8   -0.90    2.00
  -7  -4   8    1.50    2.10
   7  -4  -8    2.70    2.40
  -7  -4   8    1.40    2.30
  -8  -4  -8  457.55   12.50
  -8  -4  -8  448.06   12.20
  -8   4   8  457.85   13.20
  -8  -4   8  428.96   13.10
  -8  -4   8  451.15   12.80
  -9  -4  -8   60.49    4.00
  -9  -4  -8   61.79    4.60
  -9   4   8   62.89    4.90
  -9  -4   8   57.49    4.90
 -10  -4  -8   65.89    5.20
 -10   4   8   79.29    5.90
 -10  -4  -8   69.89    4.60
 -10  -4   8   75.59    5.60
 -11  -4  -8   -2.70    3.50
 -11   4   8   -0.20    3.50
 -11  -4  -8   -0.40    2.30
 -11  -4   8    7.90    3.30
 -12  -4  -8   79.89    5.90
 -12  -4  -8   77.99    7.40
 -12   4   8   84.19    7.40
 -12  -4   8   87.89    6.60
 -13  -4  -8    0.00    5.10
 -13   4   8   10.10    4.90
 -13  -4  -8    9.40    3.50
 -14  -4  -8    8.50    3.90
 -14   4   8    5.10    5.70
 -14  -4   8   18.50    5.20
   0  -5  -8   76.19    2.70
   0  -5   8   73.29    2.70
   0  -5   8   71.99    2.90
   0   5   8   74.99    3.30
   0   5  -8   70.19    2.60
   0  -5  -8   72.69    3.20
  -1  -5  -8   97.09    3.20
   1  -5   8   97.59    3.30
   1   5  -8   96.19    3.30
  -1   5   8   92.29    3.90
   1  -5   8   96.59    3.20
  -1  -5  -8   96.49    3.70
  -1   5  -8   97.49    3.60
   1  -5  -8   96.79    3.80
  -1  -5   8   93.39    3.60
  -1   5  -8  100.19    3.10
   1   5   8  101.19    3.90
   1  -5  -8   99.59    3.30
  -1  -5   8   96.49    3.40
  -2  -5  -8  124.59    3.90
   2  -5   8  128.69    3.90
   2   5  -8  123.39    4.00
  -2   5   8  125.49    4.60
  -2  -5  -8  126.29    4.40
   2  -5   8  125.09    3.80
  -2   5  -8  126.19    4.00
   2  -5  -8  129.09    4.50
  -2  -5   8  123.59    4.10
   2  -5  -8  124.69    4.00
   3  -5   8  285.97    7.20
  -3   5   8  292.27    8.50
  -3  -5  -8  291.07    8.20
  -3  -5  -8  288.57    7.60
   3   5  -8  285.87    7.90
   3  -5   8  286.87    7.60
  -3  -5   8  296.17    8.50
   3  -5  -8  282.27    8.30
   3  -5  -8  283.97    7.80
  -3   5  -8  295.07    7.30
  -3   5  -8  278.27    7.20
  -3  -5   8  283.87    7.90
  -4  -5  -8    3.70    1.10
   4   5  -8    1.30    1.30
  -4   5   8    2.20    1.60
   4  -5   8    0.60    1.10
  -4  -5  -8    2.40    1.30
   4  -5  -8    5.30    1.40
  -4  -5   8    3.70    1.60
   5  -5   8    9.30    1.60
   5   5  -8   10.70    2.00
  -5  -5  -8    7.10    1.40
  -5  -5  -8    9.20    1.70
  -5   5   8   10.00    2.00
  -5  -5   8    6.90    1.90
  -5  -5   8    5.50    1.70
   5  -5  -8   10.30    2.00
   5  -5  -8    8.40    1.70
  -6   5   8   30.00    3.30
   6   5  -8   24.90    2.60
  -6  -5  -8   31.70    2.80
  -6  -5  -8   30.10    2.60
  -6  -5   8   30.00    2.80
   6  -5  -8   30.80    2.90
  -6  -5   8   28.80    3.30
  -7  -5  -8   45.80    3.70
  -7  -5  -8   52.09    3.20
  -7   5   8   51.29    4.10
  -7  -5   8   49.00    4.10
  -7  -5   8   45.50    4.00
  -8   5   8   28.90    3.30
  -8  -5  -8   34.10    3.20
  -8  -5  -8   29.80    3.80
  -8  -5   8   23.50    3.10
  -9  -5  -8    1.90    2.00
  -9   5   8    2.20    2.60
  -9  -5  -8    1.80    2.50
  -9  -5   8   -0.40    2.40
 -10  -5  -8   30.00    3.10
 -10   5   8   33.50    4.10
 -10  -5  -8   32.80    4.00
 -10  -5   8   35.70    4.10
 -11   5   8   55.69    6.10
 -11  -5  -8   41.80    4.90
 -11  -5  -8   42.80    4.70
 -11  -5   8   52.59    6.00
 -12   5   8   29.50    4.80
 -12  -5  -8   24.50    3.50
 -12  -5  -8   30.80    5.30
 -12  -5   8   23.00    4.20
 -13  -5  -8   43.40    6.40
 -13   5   8   37.70    5.80
 -13  -5  -8   42.50    4.60
 -13  -5   8   68.49    7.10
 -14  -5  -8    4.70    4.00
   0  -6  -8  695.93   17.50
   0  -6  -8  686.83   16.90
   0   6  -8  695.33   16.90
   0   6   8  700.33   17.60
   0  -6   8  674.83   16.90
   0  -6   8  690.93   17.10
  -1  -6  -8    0.10    1.10
  -1  -6  -8   -0.20    0.80
   1  -6   8    0.10    0.90
   1   6  -8    0.10    1.00
   1  -6   8   -0.80    1.00
  -1   6   8    0.70    1.40
  -1  -6   8    0.60    1.00
  -1   6  -8   -0.30    0.80
  -1   6  -8   -0.30    1.60
   1  -6  -8    0.00    0.90
   1  -6  -8   -0.70    1.10
  -1  -6   8   -2.10    1.00
   2  -6   8  974.00   23.30
  -2  -6  -8  975.50   23.90
  -2   6   8  974.00   24.10
   2   6  -8  956.00   23.40
  -2  -6  -8  956.60   23.30
   2  -6   8  943.21   23.00
   2  -6  -8  984.30   23.50
  -2   6  -8  967.40   23.10
   2  -6  -8  971.60   24.00
  -2  -6   8  967.70   23.50
  -2  -6   8  981.80   24.00
   3  -6   8  189.08    5.20
   3  -6   8  198.88    5.80
  -3  -6  -8  199.98    5.80
   3   6  -8  192.18    6.00
  -3  -6  -8  203.98    6.30
  -3   6   8  206.08    6.60
   3  -6  -8  197.68    6.30
   3  -6  -8  199.68    5.90
  -3   6  -8  203.08    5.30
  -3  -6   8  197.08    6.10
  -3  -6   8  197.48    6.50
  -4  -6  -8  498.05   13.10
  -4   6   8  499.35   13.50
  -4  -6  -8  498.55   12.70
   4  -6   8  500.85   12.70
   4  -6  -8  491.75   13.30
  -4  -6   8  494.65   13.50
   4  -6  -8  495.35   12.90
  -5  -6  -8   -0.20    1.40
   5   6  -8   -3.60    1.60
  -5   6   8   -0.20    1.50
  -5  -6  -8   -0.30    1.20
   5  -6   8    2.10    1.40
   5  -6  -8   -1.40    1.40
  -5  -6   8   -2.50    1.70
  -5  -6   8   -0.90    1.70
  -6   6   8  435.86   12.30
  -6  -6  -8  419.06   11.50
   6   6  -8  407.96   11.90
   6  -6   8  440.46   11.60
  -6  -6  -8  440.66   11.90
  -6  -6   8  420.46   12.40
   6  -6  -8  427.06   12.00
   6  -6  -8  427.16   12.00
  -6  -6   8  428.76   11.90
  -7  -6  -8   32.50    3.70
  -7  -6  -8   35.50    3.20
  -7   6   8   39.70    3.70
  -7  -6   8   35.80    4.00
  -7  -6   8   30.60    3.20
   7  -6  -8   34.10    3.40
  -8  -6  -8   70.19    4.10
  -8   6   8   68.79    4.70
  -8  -6  -8   69.49    4.50
  -8  -6   8   63.09    5.00
  -9   6   8    2.90    2.70
  -9  -6  -8    6.70    2.70
 -10   6   8   97.69    5.80
 -10  -6  -8   86.49    6.00
 -10  -6  -8   88.09    5.20
 -10  -6   8   88.19    6.00
 -11   6   8    1.60    3.50
 -11  -6  -8   -1.20    3.50
 -11  -6  -8   -3.60    2.60
 -11  -6   8    3.80    3.10
 -12  -6  -8   57.99    6.20
 -12   6   8   77.99    7.10
 -12  -6  -8   60.89    5.60
 -12  -6   8   69.99    7.00
 -13  -6  -8    3.30    3.50
 -13  -6  -8   -9.20    5.20
 -13  -6   8    3.60    4.20
 -14  -6  -8   38.00    7.20
   0  -7   8   32.50    2.30
   0  -7   8   32.80    2.40
   0  -7  -8   30.50    2.10
   0  -7  -8   34.20    2.50
   0   7  -8   34.40    2.30
   1  -7   8   -1.30    1.20
  -1  -7  -8    1.40    1.00
   1  -7   8   -1.30    1.00
   1   7  -8   -0.30    1.20
  -1  -7  -8    0.60    1.20
  -1   7   8   -0.60    1.20
  -1  -7   8    1.60    1.10
  -1   7  -8   -0.10    1.10
   1  -7  -8   -1.00    1.20
  -1   7  -8   -0.90    2.50
  -1  -7   8   -0.70    1.20
   1  -7  -8   -0.10    1.00
   2   7  -8   37.60    2.70
  -2  -7  -8   37.30    2.40
   2  -7   8   40.30    2.60
  -2  -7  -8   39.10    2.70
  -2   7   8   39.80    2.90
   2  -7   8   40.30    2.20
   2  -7  -8   39.40    2.30
  -2   7  -8   42.30    2.50
   2  -7  -8   39.00    2.70
  -2  -7   8   41.40    2.80
  -2  -7   8   34.90    3.00
   3   7  -8   13.30    1.80
  -3   7   8   17.70    2.10
  -3  -7  -8   16.80    1.70
  -3  -7  -8   11.90    1.70
   3  -7   8   19.60    2.00
   3  -7   8   15.20    1.50
   3  -7  -8   14.30    1.70
  -3   7  -8   14.20    1.50
   3  -7  -8   13.60    1.90
  -3  -7   8   16.20    2.20
   4   7  -8    1.50    1.70
  -4  -7  -8    1.00    1.20
   4  -7   8   -0.50    1.30
  -4   7   8    0.60    1.60
  -4  -7  -8    2.00    1.60
  -4  -7   8   -0.50    1.90
  -4  -7   8    2.00    1.50
   4  -7  -8   -1.00    1.20
   4  -7  -8    1.90    1.40
  -5  -7  -8  155.48    5.30
  -5  -7  -8  155.28    5.60
   5   7  -8  147.99    5.80
  -5   7   8  161.08    6.00
   5  -7   8  151.18    5.40
   5  -7  -8  154.48    5.60
  -5  -7   8  148.89    5.80
   5  -7  -8  162.38    5.50
  -5  -7   8  156.18    6.30
  -6   7   8  151.78    6.00
  -6  -7  -8  156.98    5.80
  -6  -7  -8  153.38    5.40
   6  -7  -8  153.68    5.80
  -6  -7   8  142.19    6.40
  -6  -7   8  152.08    6.10
  -7  -7  -8   49.50    3.60
  -7   7   8   44.70    4.10
  -7  -7  -8   39.20    3.70
  -7  -7   8   33.00    4.30
   7  -7  -8   44.30    3.70
  -8  -7  -8   64.49    4.60
  -8   7   8   69.19    4.90
  -8  -7  -8   61.09    4.10
   8  -7  -8   58.49    4.10
  -8  -7   8   60.19    4.90
  -9  -7  -8   95.29    5.20
  -9   7   8   93.69    5.70
  -9  -7  -8   95.39    5.90
   9  -7  -8   97.49    5.30
  -9  -7   8   96.39    6.10
 -10   7   8    8.80    3.20
 -10  -7  -8   -2.30    3.20
 -10  -7  -8    4.40    2.50
  10  -7  -8   -1.80    2.60
 -10  -7   8    1.60    3.10
 -11  -7  -8   -1.70    3.70
 -11  -7  -8   -4.50    2.50
 -11   7   8    0.00    3.60
  11  -7  -8    1.30    3.10
 -11  -7   8    1.80    3.30
 -12   7   8   15.00    4.50
 -12  -7  -8    7.90    3.40
 -12  -7  -8   11.50    5.00
  12  -7  -8    9.10    3.50
 -12  -7   8   15.80    4.10
 -13  -7  -8   21.00    6.30
 -13  -7  -8   19.80    4.10
 -13  -7   8   21.40    4.70
   0  -8  -8  547.65   13.90
   0  -8  -8  544.75   14.40
   0   8  -8  534.75   13.90
   0  -8   8  534.85   13.90
   0  -8   8  560.84   14.00
   1   8  -8    6.90    1.50
   1  -8   8    7.40    1.50
   1  -8   8    7.30    1.60
  -1   8   8    6.50    1.70
  -1  -8  -8    6.30    1.60
  -1  -8  -8    5.60    1.30
  -1  -8   8    6.20    1.60
   1  -8  -8    8.90    1.60
   1  -8  -8    6.20    1.50
  -1   8  -8    7.60    1.50
  -1  -8   8    5.90    1.70
   2  -8   8  344.77    9.70
  -2  -8  -8  358.86   10.10
   2   8  -8  358.76    9.90
  -2   8   8  368.86   10.30
  -2  -8  -8  357.86    9.70
   2  -8   8  359.16    9.20
  -2   8  -8  342.77    9.10
   2  -8  -8  355.46   10.10
  -2  -8   8  363.06   10.20
   2  -8  -8  363.16    9.80
   3  -8   8   76.49    3.70
  -3  -8  -8   75.09    3.40
  -3   8   8   70.99    4.00
   3  -8   8   64.69    2.50
   3   8  -8   69.39    3.90
  -3  -8  -8   70.89    3.70
  -3   8  -8   73.39    2.50
  -3  -8   8   74.59    4.10
   3  -8  -8   74.59    3.70
   3  -8  -8   75.49    3.60
  -4  -8  -8  269.67    8.30
  -4   8   8  269.37    8.50
   4   8  -8  266.87    8.30
   4  -8   8  263.17    7.90
  -4  -8  -8  273.77    7.90
  -4  -8   8  269.37    8.30
   4  -8  -8  270.57    8.20
  -4  -8   8  270.37    8.70
   4  -8  -8  281.37    8.10
  -5  -8  -8   60.19    3.70
  -5  -8  -8   64.79    3.40
  -5   8   8   61.59    3.80
   5  -8  -8   60.19    3.70
  -5  -8   8   61.69    4.40
  -5  -8   8   68.49    4.50
   5  -8  -8   59.89    3.70
  -6  -8  -8  452.15   12.60
  -6   8   8  469.85   13.10
  -6  -8  -8  448.66   12.90
   6  -8  -8  467.45   12.80
  -6  -8   8  461.05   13.40
   6  -8  -8  456.15   12.80
  -7   8   8    4.60    2.40
  -7  -8  -8    3.80    2.30
  -7  -8  -8    6.00    2.00
  -7  -8   8    5.50    2.80
   7  -8  -8    5.40    2.20
  -8  -8  -8   29.10    3.50
  -8   8   8   25.60    3.20
  -8  -8  -8   26.80    3.50
   8  -8  -8   26.10    3.10
  -9  -8  -8   -0.90    3.00
  -9  -8  -8    1.20    2.30
  -9   8   8   -2.20    2.70
   9  -8  -8   -0.10    2.60
  -9  -8   8   -0.40    2.90
 -10  -8  -8   31.30    3.50
 -10   8   8   35.50    4.20
 -10  -8  -8   27.10    4.30
  10  -8  -8   28.50    3.70
 -10  -8   8   38.10    4.50
 -11   8   8    7.70    4.00
 -11  -8  -8    6.20    3.00
 -11  -8  -8    1.00    3.90
  11  -8  -8    8.10    3.20
 -11  -8   8    7.10    3.80
 -12  -8  -8  140.89    7.50
 -12  -8  -8  127.69    9.00
 -12  -8   8  149.39    8.40
 -13  -8  -8    2.90    5.80
 -13  -8  -8   -1.30    3.80
 -13  -8   8    3.00    4.40
   0  -9   8   75.19    3.80
   0   9  -8   70.59    3.70
   0  -9   8   76.79    3.80
   0  -9  -8   76.59    3.80
   0  -9  -8   77.99    3.50
  -1  -9  -8   48.90    3.20
   1   9  -8   55.69    3.30
  -1  -9  -8   59.19    3.10
   1  -9   8   58.49    3.30
   1  -9   8   53.39    3.40
   1  -9  -8   58.99    3.20
  -1  -9   8   57.69    3.70
   1  -9  -8   55.69    3.40
  -1   9  -8   59.29    3.30
   2  -9   8   20.70    2.40
  -2   9   8   22.70    2.50
   2  -9   8   15.90    1.80
  -2  -9  -8   14.70    2.10
  -2  -9  -8   17.10    2.00
   2   9  -8   15.90    2.70
   2  -9  -8   16.30    2.20
  -2   9  -8   14.80    1.70
   2  -9  -8   18.80    2.00
  -2   9  -8   17.80    2.00
  -2  -9   8   21.70    2.50
   3  -9   8  116.49    4.70
  -3  -9  -8  115.09    4.80
  -3   9   8  118.79    5.10
  -3  -9  -8  115.09    4.60
   3  -9   8  114.19    3.70
   3   9  -8  106.89    4.90
  -3  -9   8  109.59    5.00
  -3   9  -8  109.59    3.50
   3  -9  -8  122.09    4.70
  -3  -9   8  113.69    5.30
   3  -9  -8  114.59    4.80
  -4   9   8   19.20    2.50
  -4  -9  -8   16.00    2.00
  -4  -9  -8   16.00    2.30
  -4  -9   8   15.20    2.80
   4  -9  -8   18.00    2.40
   4  -9  -8   18.70    2.30
  -4  -9   8   16.90    2.60
  -5   9   8    7.20    2.30
  -5  -9  -8   10.30    2.00
  -5  -9  -8    9.70    2.30
   5  -9  -8    7.50    2.10
  -5  -9   8   10.20    2.70
   5  -9  -8    8.90    2.10
  -6  -9  -8   16.60    2.70
  -6  -9  -8   17.00    2.40
  -6   9   8   18.10    2.70
  -6  -9   8   21.30    3.10
   6  -9  -8   13.90    2.30
   6  -9  -8   16.20    2.50
  -7   9   8  180.58    7.00
  -7  -9  -8  177.88    7.00
  -7  -9  -8  174.18    6.60
  -7  -9   8  187.18    7.70
   7  -9  -8  173.38    6.80
   7  -9  -8  173.48    6.60
  -8   9   8   33.50    3.70
  -8  -9  -8   34.20    3.90
  -8  -9  -8   43.60    4.20
   8  -9  -8   27.50    3.20
  -8  -9   8   42.30    5.50
   8  -9  -8   35.30    3.60
  -9  -9  -8   -1.80    2.80
  -9   9   8   -0.20    3.00
  -9  -9  -8    1.50    2.40
  -9  -9   8    7.10    3.50
   9  -9  -8    3.20    2.70
 -10   9   8   45.90    5.80
 -10  -9  -8   48.30    5.20
 -10  -9  -8   41.30    5.00
 -10  -9   8   48.50    6.20
  10  -9  -8   49.90    5.00
 -11  -9  -8   55.59    5.60
 -11  -9  -8   49.40    5.60
 -11  -9   8   68.69    7.00
  11  -9  -8   62.99    8.20
 -12  -9  -8   -9.90    4.70
 -12  -9  -8    5.80    3.60
 -12  -9   8    7.40    4.20
 -13  -9  -8   35.80    6.80
 -13  -9  -8   35.30    6.20
   0 -10  -8    3.50    1.70
   0 -10  -8    5.70    1.60
   0  10  -8    5.30    1.90
   0 -10   8    6.20    1.90
   1  10  -8   10.20    2.20
  -1 -10  -8   11.90    1.90
   1 -10   8    8.60    2.00
  -1 -10  -8   10.10    2.10
   1 -10  -8   13.00    2.00
  -1  10  -8   12.60    2.00
   1 -10  -8   12.20    2.10
  -1 -10   8    8.70    2.20
  -2 -10  -8 1109.29   27.00
   2 -10   8 1094.59   26.30
  -2 -10  -8 1117.09   27.30
   2 -10  -8 1125.39   27.10
   2 -10  -8 1116.39   27.30
  -2 -10   8 1103.59   27.40
  -2  10  -8 1049.00   26.90
  -2 -10   8 1040.80   27.20
  -3 -10  -8   15.60    2.30
   3 -10   8   17.60    2.10
  -3 -10  -8   20.00    2.30
  -3  10   8   19.70    2.60
  -3 -10   8   18.00    2.90
   3 -10  -8   19.50    2.50
   3 -10  -8   17.40    2.20
  -4  10   8    4.10    2.00
  -4 -10  -8    3.90    2.00
  -4 -10  -8    2.80    1.70
   4 -10  -8    4.30    2.10
  -4 -10   8    3.00    2.60
   4 -10  -8    4.20    1.90
  -5 -10  -8   -0.30    2.00
  -5  10   8    3.30    2.30
  -5 -10  -8   -2.60    1.60
  -5 -10   8    0.70    2.60
   5 -10  -8    1.40    1.80
   5 -10  -8    0.40    2.00
  -6 -10  -8  267.07    8.60
  -6 -10  -8  281.87    9.20
  -6  10   8  276.57    9.10
   6 -10  -8  280.57    9.00
  -6 -10   8  268.67    9.60
   6 -10  -8  267.37    8.80
  -7 -10  -8    0.50    2.20
  -7 -10  -8    5.50    2.70
  -7  10   8   -1.70    2.60
   7 -10  -8    4.40    2.40
   7 -10  -8    4.80    2.20
  -7 -10   8    1.80    2.70
  -8 -10  -8    8.70    3.20
  -8 -10  -8   14.70    2.90
  -8  10   8   15.00    3.20
   8 -10  -8    8.70    2.70
  -8 -10   8   13.80    3.20
   8 -10  -8    5.70    2.90
  -9 -10  -8   -0.20    2.50
  -9  10   8   -1.00    3.10
  -9 -10  -8    1.10    3.20
   9 -10  -8    2.10    2.80
  -9 -10   8    5.90    3.40
 -10 -10  -8  210.58    8.60
 -10  10   8  204.18    8.80
 -10 -10  -8  206.38    9.40
 -10 -10   8  215.88    9.80
  10 -10  -8  219.78    8.50
  10 -10  -8  219.98    9.20
 -11 -10  -8   10.40    3.60
 -11 -10  -8   -2.90    4.30
 -11 -10   8   15.70    4.10
 -12 -10  -8    2.90    3.70
 -12 -10   8   12.50    4.70
   0 -11  -8  604.84   15.70
   0 -11   8  571.04   15.50
   0 -11  -8  598.34   15.90
   1 -11   8  402.86   14.40
  -1 -11  -8  460.55   12.60
  -1 -11  -8  475.65   12.90
   1 -11  -8  477.35   12.80
  -1 -11   8  468.15   12.80
   1 -11  -8  470.45   12.90
   2 -11   8   29.20    3.00
  -2 -11  -8   25.20    3.00
  -2 -11  -8   24.90    2.60
  -2 -11   8   23.80    3.00
   2 -11  -8   28.60    2.80
   2 -11  -8   23.30    2.80
  -3 -11  -8  312.87    9.50
  -3 -11  -8  316.97    9.70
  -3 -11   8  310.17   10.00
   3 -11  -8  319.77    9.60
   3 -11  -8  311.97    9.50
  -4  11   8   64.49    4.60
  -4 -11  -8   70.79    4.20
  -4 -11  -8   61.99    4.10
   4 -11  -8   66.09    4.30
  -4 -11   8   61.69    4.90
   4 -11  -8   64.69    4.20
  -5 -11  -8   19.80    2.90
  -5 -11  -8   19.70    2.70
  -5  11   8   24.10    3.10
   5 -11  -8   23.10    2.90
   5 -11  -8   22.00    2.80
  -5 -11   8   25.20    3.60
  -6  11   8   -0.70    2.40
  -6 -11  -8   -2.80    2.30
   6 -11  -8   -1.90    2.10
  -6 -11   8    0.60    3.20
   6 -11  -8    1.20    2.30
  -7 -11  -8  138.19    6.60
  -7  11   8  135.99    6.40
  -7 -11  -8  126.89    6.10
   7 -11  -8  140.89    6.60
  -7 -11   8  131.99    7.10
   7 -11  -8  137.59    6.10
  -8 -11  -8   -7.00    3.00
  -8 -11  -8    2.60    2.50
  -8  11   8    0.40    2.90
  -8 -11   8    2.60    3.10
   8 -11  -8    1.50    4.10
   8 -11  -8    3.20    2.70
  -9 -11  -8   30.40    4.00
  -9 -11  -8   18.20    4.10
  -9  11   8   23.30    4.10
   9 -11  -8   20.50    3.90
   9 -11  -8   27.30    3.60
 -10 -11  -8   13.30    4.40
 -10 -11  -8   23.00    3.90
 -10 -11   8   35.60    5.00
  10 -11  -8   19.10    4.40
 -11 -11  -8   77.79    7.80
 -11 -11  -8   91.09    7.00
 -11 -11   8  102.29    8.50
 -12 -11  -8    1.60    5.80
 -12 -11  -8   19.00    4.70
   0 -12   8   40.50    4.00
   0 -12  -8   41.20    3.80
   0 -12  -8   37.60    3.50
   1 -12   8    3.40    2.00
  -1 -12  -8    0.50    1.90
  -1 -12  -8    0.90    1.80
   1 -12  -8    2.50    1.90
  -1 -12   8    2.20    2.30
   1 -12  -8    1.70    1.90
   2 -12   8   93.79    4.40
  -2 -12  -8   91.49    4.80
  -2 -12  -8   92.99    4.90
  -2 -12   8   89.39    5.30
   2 -12  -8   93.59    4.70
   2 -12  -8   95.19    4.90
  -3 -12  -8    4.30    2.30
  -3 -12  -8   -1.10    1.90
   3 -12  -8    0.20    2.00
  -3 -12   8    1.00    2.50
   3 -12  -8    3.00    2.10
  -4 -12  -8  252.57    8.50
  -4 -12  -8  232.08   10.40
   4 -12  -8  270.17    8.70
  -4 -12   8  249.38    9.20
   4 -12  -8  254.97    8.30
  -5 -12  -8   12.40    2.70
  -5 -12  -8   11.70    3.00
   5 -12  -8   16.10    2.70
  -5 -12   8   10.80    3.40
   5 -12  -8   13.70    2.80
  -6 -12  -8   -4.40    2.50
  -6 -12  -8    3.30    2.20
  -6  12   8   -1.10    2.60
  -6 -12   8    4.50    3.00
   6 -12  -8   -2.40    2.40
   6 -12  -8    3.80    2.50
  -7 -12  -8   -1.50    2.40
  -7 -12  -8   -3.20    2.80
  -7  12   8    2.10    2.90
   7 -12  -8    2.60    2.90
  -7 -12   8   -1.80    3.00
  -8  12   8   85.89    6.20
  -8 -12  -8   82.79    6.20
  -8 -12  -8   89.09    6.10
  -8 -12   8   89.99    6.70
   8 -12  -8   89.59    5.70
   8 -12  -8   99.29    6.40
  -9 -12  -8    4.50    3.30
  -9 -12   8   15.10    3.90
   9 -12  -8   -4.90    3.40
 -10 -12  -8   65.79    6.30
 -10 -12  -8   60.09    6.60
  10 -12  -8   74.39    7.30
 -11 -12  -8    6.30    3.90
 -11 -12  -8   -0.60    4.70
   0 -13  -8   10.00    2.50
   0 -13  -8    8.80    2.40
   0 -13   8    8.50    2.60
  -1 -13  -8    9.90    2.60
  -1 -13  -8   11.20    2.40
   1 -13   8   11.70    2.50
  -1 -13   8   13.30    2.90
   1 -13  -8   12.00    2.50
   1 -13  -8   10.40    2.60
  -2 -13  -8    1.80    2.30
   2 -13  -8    0.20    2.20
  -2 -13   8    0.80    2.70
   2 -13  -8    2.60    2.30
  -3 -13  -8    9.70    3.80
  -3 -13  -8   12.00    2.70
   3 -13  -8   11.70    2.60
   3 -13  -8   15.00    2.80
  -3 -13   8   14.60    3.20
  -4 -13  -8    1.10    2.30
  -4 -13  -8    2.60    2.40
   4 -13  -8   -2.10    2.30
  -4 -13   8    0.30    3.00
   4 -13  -8    0.30    2.40
  -5 -13  -8   52.79    4.60
  -5 -13  -8   49.90    4.70
   5 -13  -8   47.50    4.50
  -5 -13   8   45.70    5.50
   5 -13  -8   53.19    5.00
  -6 -13  -8    4.40    2.60
  -6 -13  -8    2.10    2.80
   6 -13  -8    4.60    2.90
   6 -13  -8   -0.10    2.60
  -6 -13   8    6.90    3.50
  -7 -13  -8   17.70    3.30
  -7 -13  -8   18.40    3.80
   7 -13  -8   26.20    3.80
  -7 -13   8   24.50    4.40
   7 -13  -8   23.50    3.60
  -8 -13  -8    9.00    3.40
  -8  13   8   10.00    4.90
  -8 -13  -8    6.50    3.50
  -8 -13   8   15.10    4.20
   8 -13  -8   12.50    4.00
   8 -13  -8    8.40    3.90
  -9 -13  -8    8.40    3.70
  -9 -13   8   16.50    4.30
   9 -13  -8   12.60    4.20
 -10 -13  -8   37.40    4.80
   0 -14   8   91.59    5.60
   0 -14  -8   87.09    5.70
  -1 -14  -8   62.99    5.70
  -1 -14  -8   56.79    4.50
   1 -14  -8   58.49    6.80
  -1 -14   8   58.49    5.30
  -2 -14  -8   69.79    4.80
  -2 -14  -8   78.39    5.20
   2 -14  -8   65.09    4.90
  -2 -14   8   76.19    5.80
  -3 -14  -8    3.40    2.60
  -3 -14  -8    6.00    2.60
   3 -14  -8    8.00    5.10
  -3 -14   8    9.80    3.40
   3 -14  -8    8.30    2.80
  -4 -14  -8   61.39    5.10
  -4 -14  -8   53.49    4.80
   4 -14  -8   46.10    4.60
   4 -14  -8   45.40    4.30
  -5 -14  -8   22.80    3.30
  -5 -14  -8   20.40    3.60
   5 -14  -8   19.60    3.30
   5 -14  -8   21.30    3.40
  -5 -14   8   19.50    4.10
  -6 -14  -8   68.39    5.70
  -6 -14  -8   61.99    5.90
   6 -14  -8   62.59    5.80
  -6 -14   8   66.49    6.30
   6 -14  -8   56.69    5.40
  -7 -14  -8    8.30    3.20
  -7 -14  -8    5.30    3.70
   7 -14  -8   13.50    3.80
  -7 -14   8   19.30    4.40
  -8 -14  -8   56.89    5.20
  -8 -14  -8   58.69    6.30
  -8 -14   8   74.49    7.30
   8 -14  -8   68.59    7.00
  -9 -14  -8    6.30    4.00
  -9 -14  -8   -7.60    4.20
  -9 -14   8    9.30    4.60
   0 -15  -8   24.80    3.40
   0 -15  -8   28.70    3.50
  -1 -15  -8   -0.20    2.60
  -1 -15  -8    1.50    2.70
  -1 -15   8   -3.00    3.00
   1 -15  -8   -3.20    2.50
   1 -15  -8   -1.40    2.60
  -2 -15  -8    4.10    2.90
  -2 -15  -8    7.00    2.90
  -2 -15   8    4.90    3.40
   2 -15  -8    3.30    3.00
   2 -15  -8    4.40    2.70
  -3 -15  -8    5.40    2.90
  -3 -15  -8   -0.60    2.80
   3 -15  -8   -0.10    2.80
   3 -15  -8    3.20    3.10
  -3 -15   8    2.60    5.20
  -4 -15  -8   12.40    3.40
  -4 -15  -8   16.50    3.50
   4 -15  -8   16.10    3.70
   4 -15  -8   15.10    3.40
  -4 -15   8   16.90    4.20
  -5 -15  -8   51.39    5.40
  -5 -15  -8   52.79    5.30
   5 -15  -8   43.30    5.10
   5 -15  -8   44.40    4.70
  -5 -15   8   50.19    5.30
  -6 -15  -8   -1.90    3.30
  -6 -15  -8   -2.30    3.10
  -6 -15   8    8.10    4.00
   6 -15  -8    1.70    3.80
   6 -15  -8    5.90    3.10
  -7 -15  -8   -4.90    3.20
  -7 -15  -8   -9.90    3.70
  -7 -15   8    4.20    4.10
   7 -15  -8   -0.10    3.90
  -8 -15  -8    2.60    4.20
  -8 -15  -8   -2.90    3.90
  -8 -15   8    4.90    4.50
   8 -15  -8   -0.50    5.30
  -9 -15  -8    6.80    4.30
   0 -16  -8    9.40    3.40
   0 -16  -8    7.80    3.10
  -1 -16  -8   -0.40    3.10
  -1 -16  -8    5.80    3.20
   1 -16  -8    8.10    3.30
   1 -16  -8    0.10    2.80
  -2 -16  -8   75.99    6.10
  -2 -16  -8   68.89    5.60
   2 -16  -8   61.59    5.30
   2 -16  -8   67.79    5.90
  -2 -16   8   68.89    6.60
  -3 -16  -8    0.10    3.20
  -3 -16  -8    6.00    3.30
  -3 -16   8    6.80    4.10
   3 -16  -8    5.80    3.30
   3 -16  -8    0.70    3.30
  -4 -16  -8  155.28    8.20
  -4 -16  -8  161.48    8.30
   4 -16  -8  183.28    8.70
   4 -16  -8  176.88    7.70
  -4 -16   8  172.98    9.00
  -5 -16  -8   12.80    3.50
  -5 -16  -8    0.60    3.60
  -5 -16   8    8.30    4.50
   5 -16  -8    4.30    3.90
   5 -16  -8   -0.50    3.40
  -6 -16  -8   58.69    5.40
  -6 -16  -8   45.80    5.50
  -6 -16   8   59.49    7.30
   6 -16  -8   55.89    5.60
  -7 -16  -8   -1.20    3.60
  -7 -16  -8   -3.40    4.20
  -7 -16   8    6.60    4.80
   7 -16  -8    0.40    5.00
   0 -17  -8    2.40    3.50
   0 -17  -8   -1.80    3.40
  -1 -17  -8   -5.70    3.30
  -1 -17  -8    2.60    3.30
   1 -17  -8    0.20    3.50
   1 -17  -8   -4.20    3.30
  -2 -17  -8   11.20    3.90
  -2 -17  -8   13.10    3.80
   2 -17  -8   10.30    3.70
   2 -17  -8   14.50    3.90
  -3 -17  -8   36.00    4.80
  -3 -17  -8   43.10    4.80
   3 -17  -8   44.80    5.00
   3 -17  -8   39.90    4.60
  -3 -17   8   43.00    5.50
  -4 -17  -8   28.50    4.70
  -4 -17  -8   32.10    4.70
   4 -17  -8   24.50    4.70
   4 -17  -8   28.50    4.30
  -4 -17   8   31.80    5.40
  -5 -17  -8   30.80    4.70
  -5 -17  -8   12.90    4.50
  -5 -17   8   24.00    5.20
   5 -17  -8   22.20    4.90
  -6 -17  -8    9.90    4.50
  -6 -17   8   19.80    5.40
   0 -18  -8  125.19    7.80
   0 -18  -8  126.29    8.30
  -1 -18  -8    8.30    4.00
  -1 -18  -8    2.40    4.10
   1 -18  -8    1.60    3.90
   1 -18  -8    4.10    4.00
  -2 -18  -8   31.20    4.80
  -2 -18  -8   36.20    5.10
   2 -18  -8   38.90    5.00
   2 -18  -8   41.40    5.40
  -3 -18  -8   -0.60    3.90
  -3 -18  -8    7.50    4.10
   3 -18  -8   -2.40    4.10
   3 -18  -8   -3.30    4.20
  -4 -18  -8   50.79    5.50
  -4 -18  -8   31.60    6.40
   4 -18  -8   49.80    5.70
  -4 -18   8   44.30    6.20
   0   0   9    0.70    1.10
   0   0  -9    0.00    0.90
  -1   0   9    0.00    1.00
   1   0  -9   -0.50    0.50
  -1   0  -9   -0.40    0.90
   1   0   9   -0.50    1.00
   2   0  -9   -0.60    0.70
  -2   0   9   -0.40    1.40
  -2   0  -9    0.90    0.80
   2   0   9    1.70    1.00
  -3   0  -9    0.90    0.80
  -3   0   9   -1.00    1.20
   3   0   9   -0.60    0.90
   3   0  -9    0.90    1.00
  -4   0  -9   -0.80    0.80
  -4   0   9   -0.20    1.10
   4   0  -9    0.90    1.20
  -4   0   9   -0.80    1.20
   5   0  -9   -1.20    1.40
  -5   0  -9    0.00    1.00
  -5   0   9    1.30    1.30
  -5   0   9   -0.40    1.40
  -6   0  -9    0.00    1.20
  -6   0   9    1.50    1.60
   7   0  -9   -0.20    2.10
  -7   0   9   -1.10    1.90
  -7   0   9   -0.80    1.80
  -7   0  -9    0.80    1.50
  -8   0  -9    1.00    1.80
  -8   0   9    2.20    2.30
  -9   0  -9   -2.60    2.20
  -9   0   9    0.30    2.40
 -10   0   9   -2.00    2.80
 -10   0  -9    0.40    2.80
 -11   0   9   -0.60    3.10
 -12   0   9    5.30    3.60
 -13   0   9   10.10    4.30
 -14   0   9    5.50    5.10
   0  -1   9   -0.50    1.00
   0  -1  -9    0.10    0.80
   0   1   9   -0.30    0.90
   1  -1   9   89.69    3.40
  -1  -1  -9   89.29    3.30
   1   1  -9   91.89    2.60
  -1   1   9   86.99    3.70
  -1  -1   9   88.59    2.60
   1  -1  -9   90.79    2.70
  -1   1  -9   89.89    3.20
  -1  -1   9   93.49    3.70
   1  -1  -9   90.39    3.50
   1   1   9   93.49    3.50
  -2  -1  -9   29.70    1.90
   2   1  -9   36.30    1.70
  -2   1   9   35.20    2.60
   2  -1   9   35.70    2.00
   2   1   9   34.10    2.10
  -2  -1   9   36.60    1.80
  -2   1  -9   31.90    1.80
   2  -1  -9   34.60    1.80
  -3   1   9    4.70    1.50
   3   1  -9    4.10    1.10
  -3  -1  -9    3.10    1.00
  -3  -1  -9    4.90    0.70
   3  -1   9    4.40    1.10
  -3  -1   9    3.70    1.10
   3  -1  -9    3.40    1.10
  -3  -1   9    3.20    1.50
  -3   1  -9    3.20    0.90
   4  -1   9    4.20    1.30
  -4   1   9    4.50    1.70
  -4  -1  -9    5.30    0.90
   4   1  -9    4.20    1.30
  -4  -1  -9    4.40    1.10
  -4  -1   9    4.10    1.50
  -4  -1   9    5.70    1.30
  -4   1  -9    5.50    1.10
   4  -1  -9    3.80    1.20
   5   1  -9   63.89    3.40
  -5  -1  -9   65.99    2.80
  -5  -1  -9   66.79    2.60
  -5   1   9   72.29    3.80
  -5  -1   9   64.79    3.30
   5  -1  -9   65.59    3.30
  -5  -1   9   65.09    3.70
  -5   1  -9   68.19    2.70
  -6   1   9    4.50    1.80
  -6  -1  -9    6.40    1.30
  -6  -1   9    4.40    1.90
  -6   1  -9    9.40    1.40
   6  -1  -9    2.20    2.60
  -7  -1  -9   27.30    2.50
  -7  -1  -9   21.80    2.70
  -7   1   9   20.80    2.90
   7   1  -9   22.70    2.90
  -7   1  -9   28.60    2.60
   7  -1  -9   22.70    2.70
  -7  -1   9   21.00    2.50
  -7  -1   9   28.10    3.30
  -8  -1  -9   26.80    3.20
  -8  -1  -9   24.20    2.30
  -8   1   9   21.50    3.20
  -8  -1   9   22.70    3.20
  -8   1  -9   29.70    3.30
  -8  -1   9   28.90    3.20
  -9  -1  -9   63.59    4.60
  -9   1   9   73.39    5.40
  -9   1  -9   77.49    7.00
  -9  -1   9   73.49    4.90
 -10   1   9   23.60    3.70
 -10  -1  -9   19.40    3.30
 -10  -1   9   17.60    3.40
 -11  -1  -9    9.30    3.60
 -11   1   9    2.90    3.50
 -11  -1   9    8.70    3.30
 -12   1   9   10.30    4.30
 -12  -1   9    5.50    3.70
 -13   1   9   70.59    8.20
 -13  -1   9   70.69    7.10
 -14   1   9   18.10    5.80
 -14  -1   9   12.00    5.30
   0  -2   9    0.40    0.60
   0   2   9    0.00    1.00
   0  -2   9   -1.40    1.00
   0   2  -9   -0.60    0.40
   0  -2  -9    0.20    0.50
   0  -2  -9    0.00    0.90
   1  -2   9  312.47    8.30
  -1   2   9  297.97    9.10
  -1  -2  -9  317.37    8.50
  -1  -2  -9  297.87    7.50
   1   2  -9  317.27    7.60
  -1  -2   9  309.27    8.50
   1   2   9  308.27    8.50
  -1  -2   9  303.87    7.60
   1  -2  -9  288.97    8.90
   1  -2  -9  325.67    7.70
   1  -2  -9  311.17    7.60
  -2  -2  -9   12.90    1.60
  -2   2   9   14.30    1.80
   2  -2   9   14.30    1.60
   2   2  -9   14.40    1.30
  -2  -2  -9   15.20    1.00
   2  -2   9   13.20    0.90
  -2   2  -9   14.00    1.40
  -2   2  -9   15.20    1.80
   2   2   9   17.10    1.80
  -2  -2   9   13.60    1.60
  -2  -2   9   15.50    3.10
   2  -2  -9   15.60    1.50
   3  -2   9    3.80    0.80
  -3   2   9    5.00    1.60
  -3  -2  -9    4.00    1.10
  -3  -2  -9    5.00    0.80
   3   2  -9    4.20    1.10
   3  -2   9    4.60    1.00
   3  -2  -9    5.70    1.20
  -3   2  -9    4.60    1.30
  -3  -2   9    3.50    1.50
  -3  -2   9    4.20    1.30
  -3   2  -9    3.60    0.90
  -4   2   9    3.00    1.50
   4   2  -9    3.20    1.30
  -4  -2  -9    2.30    0.90
   4  -2  -9    3.50    1.30
  -4  -2   9    5.80    1.50
  -4   2  -9    3.80    1.30
  -4   2  -9    3.00    1.00
  -4  -2   9    2.70    1.40
  -5  -2  -9   30.60    2.30
  -5   2   9   28.80    3.00
  -5  -2  -9   26.60    1.90
   5   2  -9   29.60    2.80
  -5  -2   9   27.20    2.80
  -5  -2   9   31.80    2.80
  -5   2  -9   24.90    2.30
   5  -2  -9   27.50    2.70
  -5   2  -9   29.30    1.80
  -6   2   9    1.40    1.80
   6  -2   9    0.00    1.30
  -6  -2  -9   -0.20    1.30
  -6  -2  -9    1.60    1.10
  -6   2  -9    0.40    1.40
   6  -2  -9   -0.30    1.80
  -6   2  -9   -0.20    1.10
  -6  -2   9    0.50    1.60
   7   2  -9    1.70    2.30
  -7  -2  -9    1.50    1.30
  -7   2   9   -3.70    1.90
   7  -2   9    0.90    1.40
  -7  -2  -9    0.60    1.60
  -7   2  -9    2.00    2.60
   7  -2  -9   -1.70    1.90
  -7   2  -9    0.80    1.40
  -7  -2   9   -5.80    1.90
  -7  -2   9   -1.90    1.90
  -8  -2  -9   73.19    4.10
  -8  -2  -9   74.59    3.80
  -8   2   9   75.99    4.70
  -8  -2   9   70.49    4.90
  -8   2  -9   73.89    4.00
  -9  -2  -9    0.30    1.70
  -9   2   9    6.90    2.80
  -9  -2  -9   -1.40    2.30
  -9  -2   9   -3.40    2.40
  -9   2  -9    0.40    2.50
 -10  -2  -9   10.20    2.30
 -10   2   9   15.20    3.40
 -10  -2  -9    8.80    3.00
 -11  -2  -9    1.60    2.40
 -11  -2  -9   -3.20    3.40
 -11   2   9   -0.90    3.10
 -11  -2   9    9.60    3.30
 -12   2   9   15.20    4.20
 -12  -2   9   12.60    3.70
 -13   2   9   90.79    7.80
 -13  -2   9   89.29    7.90
 -14   2   9    4.70    5.30
 -14  -2   9    1.20    4.90
   0   3  -9    0.30    0.60
   0  -3   9   -1.10    0.70
   0  -3  -9   -0.80    0.60
   0   3   9    0.80    1.20
   0  -3   9    0.20    1.00
   0  -3  -9   -1.50    1.00
   1  -3   9    6.70    0.80
   1  -3   9    5.70    1.20
  -1  -3  -9    4.40    1.20
   1   3  -9    5.80    0.80
  -1  -3  -9    5.20    0.80
  -1   3   9    6.10    1.40
  -1  -3   9    6.20    1.40
   1   3   9    5.60    1.40
  -1  -3   9    6.80    1.00
   1  -3  -9    6.20    1.30
   1  -3  -9    6.90    0.90
   2  -3   9   15.80    1.20
  -2  -3  -9   15.20    1.80
  -2  -3  -9   13.90    1.10
  -2   3   9   17.20    1.90
   2   3  -9   17.10    1.50
   2  -3   9   16.50    1.60
  -2  -3   9   14.90    1.80
  -2   3  -9   19.20    1.90
  -2  -3   9   15.20    2.10
   2   3   9   18.70    2.00
   2  -3  -9   18.60    2.00
  -2   3  -9   16.00    1.50
   3   3  -9  155.58    4.70
   3  -3   9  153.98    4.50
  -3  -3  -9  154.78    4.30
   3  -3   9  144.99    4.20
  -3  -3  -9  158.98    5.00
  -3   3   9  157.78    5.50
   3  -3  -9  155.78    4.70
  -3   3  -9  150.58    4.60
  -3   3  -9  156.88    4.40
  -3  -3   9  152.88    4.70
   3  -3  -9  158.28    5.30
  -3  -3   9  152.28    5.40
   4  -3   9    0.60    1.00
  -4   3   9   -1.30    1.40
  -4  -3  -9    1.20    1.20
   4   3  -9    1.50    1.20
  -4  -3  -9    0.70    0.90
  -4  -3   9    0.10    1.40
  -4   3  -9   -0.50    1.10
  -4  -3   9   -0.80    1.30
  -4   3  -9   -0.40    0.80
   4  -3  -9    1.40    1.30
  -5  -3  -9   57.19    2.50
  -5   3   9   51.99    3.50
  -5  -3  -9   56.99    2.90
   5   3  -9   51.19    3.20
  -5  -3   9   52.99    3.50
  -5   3  -9   51.19    2.60
   5  -3  -9   52.49    3.20
  -5   3  -9   58.09    2.20
  -5  -3   9   49.50    3.20
  -6   3   9    1.80    1.90
  -6  -3  -9    1.80    1.50
   6   3  -9   -1.50    1.90
  -6  -3  -9    0.90    1.20
   6  -3  -9    2.50    2.00
  -6   3  -9    0.00    1.30
  -6  -3   9    1.70    1.70
  -6  -3   9   -3.10    1.70
  -6   3  -9    0.80    1.00
  -7  -3  -9   10.60    2.00
  -7  -3  -9    9.70    1.70
   7   3  -9    8.90    2.60
  -7   3   9    9.60    2.50
  -7  -3   9    8.90    2.40
  -7   3  -9    8.10    1.80
   7  -3  -9    9.70    2.60
  -7  -3   9    9.10    2.30
  -7   3  -9   12.60    1.70
  -8  -3  -9   53.39    3.80
  -8   3   9   56.49    4.50
  -8  -3  -9   54.09    3.40
  -8  -3   9   54.19    4.40
  -8   3  -9   52.99    3.50
  -9   3   9  111.09    6.00
  -9  -3  -9  113.99    5.50
  -9  -3  -9  115.89    4.90
  -9  -3   9  105.79    5.90
 -10   3   9   54.69    5.30
 -10  -3  -9   52.19    4.30
 -10  -3  -9   48.10    5.00
 -10  -3   9   59.29    5.40
 -11  -3  -9   47.40    6.10
 -11  -3  -9   59.99    4.70
 -11   3   9   58.09    7.20
 -11  -3   9   58.49    5.90
 -12  -3  -9   86.19    7.50
 -12   3   9   90.99    7.50
 -12  -3  -9   85.19    5.90
 -12  -3   9   77.39    7.20
 -13   3   9  145.29    9.50
 -13  -3   9  153.58    9.10
 -14   3   9    0.30    5.50
 -14  -3   9   13.80    4.90
   0   4   9   -0.20    1.20
   0  -4  -9    0.40    1.00
   0   4  -9   -0.90    0.60
   0  -4  -9   -0.50    0.70
   0  -4   9    0.30    0.80
   0  -4   9    1.50    1.00
   1   4  -9   30.60    1.70
   1  -4   9   29.10    2.00
  -1  -4  -9   29.00    1.60
  -1  -4  -9   30.20    2.20
  -1   4   9   31.70    2.40
   1  -4   9   27.50    1.60
  -1   4  -9   29.40    1.40
   1  -4  -9   28.90    2.20
   1   4   9   28.30    2.40
  -1  -4   9   28.50    2.30
   1  -4  -9   29.90    1.60
  -1  -4   9   29.40    1.90
   2  -4   9   50.49    2.10
   2   4  -9   53.39    2.40
  -2   4   9   54.39    3.10
  -2  -4  -9   54.79    2.80
  -2  -4  -9   51.59    2.10
   2  -4   9   51.59    2.30
  -2  -4   9   49.20    2.50
  -2   4  -9   54.69    2.60
  -2  -4   9   50.39    2.90
   2  -4  -9   54.49    2.90
   2  -4  -9   49.40    2.20
  -3   4   9  217.18    7.00
  -3  -4  -9  222.48    6.60
   3  -4   9  214.48    5.80
   3   4  -9  215.98    6.20
   3  -4   9  222.08    5.90
  -3  -4  -9  217.18    5.90
  -3  -4   9  223.48    6.90
  -3   4  -9  211.68    5.80
  -3  -4   9  217.68    6.30
  -3   4  -9  220.18    6.00
   3  -4  -9  217.78    6.80
   4   4  -9   45.90    2.80
   4  -4   9   48.50    2.40
  -4   4   9   49.50    3.30
  -4  -4  -9   49.99    2.30
  -4  -4  -9   50.09    2.80
   4  -4  -9   50.99    3.00
  -4  -4   9   48.60    2.80
   4  -4  -9   45.70    3.00
  -4   4  -9   48.30    2.00
  -4  -4   9   51.29    3.20
  -4   4  -9   40.70    2.20
  -5   4   9    7.50    1.90
  -5  -4  -9    7.90    1.40
  -5  -4  -9    6.90    1.60
   5   4  -9    6.10    1.70
   5  -4  -9    6.40    1.80
  -5   4  -9    8.50    1.20
  -5   4  -9    8.70    1.00
  -5  -4   9    7.70    1.90
  -6  -4  -9   16.80    2.00
  -6  -4  -9   16.80    1.80
   6   4  -9   16.70    2.40
  -6   4   9   17.30    2.60
  -6   4  -9   15.40    1.70
  -6  -4   9   16.10    2.50
  -6   4  -9   19.60    1.70
   6  -4  -9   13.90    2.40
  -7  -4  -9    8.90    2.00
  -7  -4  -9   10.50    1.80
  -7   4   9    7.20    2.30
  -7  -4   9    8.80    2.40
  -7  -4   9    8.10    2.60
  -8  -4  -9   23.00    2.30
  -8   4   9   20.40    3.20
  -8  -4  -9   22.20    2.80
  -8  -4   9   24.50    3.20
  -9   4   9  134.29    6.50
  -9  -4  -9  130.09    5.90
  -9  -4  -9  122.99    6.90
  -9  -4   9  129.09    6.40
 -10  -4  -9   30.30    3.10
 -10   4   9   29.50    4.10
 -10  -4  -9   28.00    3.80
 -10  -4   9   32.30    4.10
 -11  -4  -9    8.20    2.80
 -11   4   9    9.90    5.20
 -11  -4  -9   10.20    3.80
 -11  -4   9   21.70    3.70
 -12  -4  -9  172.58    7.60
 -12   4   9  175.78    9.30
 -12  -4  -9  181.28   14.50
 -12  -4   9  188.68    9.00
 -13   4   9   76.39    8.40
 -13  -4  -9   79.49    6.50
 -13  -4   9   69.89    7.50
 -14  -4  -9   10.20    6.30
 -14   4   9   18.30    5.80
 -14  -4   9   16.30    5.40
   0  -5   9    0.40    1.00
   0  -5  -9    0.70    1.20
   0  -5   9   -1.50    0.90
   0  -5  -9    0.00    0.70
   0   5  -9   -0.30    0.70
   0   5   9    2.20    1.40
  -1  -5  -9  227.48    6.90
   1  -5   9  220.38    6.10
  -1  -5  -9  221.08    6.00
  -1   5   9  228.18    7.10
   1   5  -9  222.28    6.20
   1  -5   9  217.28    6.30
  -1  -5   9  230.48    6.70
   1  -5  -9  224.38    6.90
  -1  -5   9  228.38    6.30
  -1   5  -9  228.58    6.00
   1  -5  -9  222.18    6.20
   1   5   9  235.68    7.00
   2  -5   9   16.20    1.80
  -2  -5  -9   21.40    2.20
   2  -5   9   23.10    1.90
   2   5  -9   22.50    1.90
  -2   5   9   21.10    2.50
  -2  -5  -9   21.00    1.70
  -2  -5   9   27.20    2.20
  -2  -5   9   23.00    2.40
   2  -5  -9   23.00    2.30
   2  -5  -9   25.30    1.80
  -2   5  -9   23.40    2.20
   3  -5   9  200.98    5.50
  -3  -5  -9  203.38    6.30
  -3  -5  -9  205.08    5.70
   3  -5   9  200.98    5.70
  -3   5   9  199.68    6.60
   3   5  -9  199.48    6.00
   3  -5  -9  199.18    6.50
  -3   5  -9  205.28    5.60
   3  -5  -9  201.28    5.90
  -3  -5   9  203.08    6.60
  -3   5  -9  195.88    5.40
  -3  -5   9  203.08    6.10
   4   5  -9   20.00    2.10
   4  -5   9   19.30    2.20
  -4  -5  -9   24.50    2.50
  -4  -5  -9   18.60    1.90
  -4   5   9   25.00    3.00
  -4  -5   9   23.30    2.80
  -4   5  -9   22.20    1.30
   4  -5  -9   25.00    2.40
  -4  -5   9   20.70    2.30
  -4   5  -9   20.40    1.80
  -5  -5  -9   12.40    1.90
  -5   5   9   15.70    2.30
  -5  -5  -9   15.20    1.70
   5  -5   9   14.00    1.70
   5   5  -9   11.90    2.10
  -5  -5   9   11.60    2.30
   5  -5  -9   11.50    2.40
   5  -5  -9   11.40    2.00
  -6  -5  -9   49.50    3.30
  -6  -5  -9   52.19    3.00
   6   5  -9   55.29    3.80
   6  -5   9   50.29    3.30
  -6   5   9   51.29    3.90
  -6  -5   9   41.80    3.70
  -6  -5   9   52.79    4.10
   6  -5  -9   52.69    3.90
  -7  -5  -9  144.29    5.20
  -7  -5  -9  143.19    5.50
  -7   5   9  145.69    6.20
  -7  -5   9  133.99    6.20
  -8   5   9   27.90    3.40
  -8  -5  -9   28.30    3.10
  -8  -5  -9   32.20    3.80
  -8  -5   9   27.10    3.30
  -9  -5  -9   10.60    2.30
  -9  -5  -9    8.80    2.80
  -9   5   9   10.30    3.20
 -10  -5  -9    2.00    3.00
 -10  -5  -9    3.40    2.30
 -10   5   9    8.20    3.50
 -10  -5   9    1.50    3.00
 -11  -5  -9    6.60    2.60
 -11  -5  -9   -0.60    3.60
 -11   5   9    3.60    5.10
 -11  -5   9    8.70    3.40
 -12  -5  -9   34.00    5.30
 -12  -5  -9   30.80    3.90
 -12   5   9   39.30    5.30
 -12  -5   9   47.20    6.20
 -13  -5  -9   13.30    5.80
 -13   5   9   13.30    5.20
 -13  -5  -9   14.10    3.60
 -14  -5   9   14.00    6.00
   0  -6  -9   -0.10    1.20
   0   6   9   -1.50    1.20
   0  -6  -9    0.60    0.90
   0  -6   9   -0.80    1.00
   0  -6   9    0.80    1.00
   0   6  -9   -0.90    0.90
   1   6  -9   90.19    3.40
   1  -6   9   92.59    3.30
  -1  -6  -9   90.29    3.20
  -1   6   9   90.29    4.00
  -1  -6  -9   91.29    3.80
   1  -6   9   89.69    3.50
  -1   6  -9   92.29    3.20
   1  -6  -9   95.39    3.90
  -1  -6   9   91.49    3.50
   1  -6  -9   92.09    3.30
  -2  -6  -9  335.47    8.70
  -2   6   9  339.77    9.70
   2   6  -9  322.07    8.90
   2  -6   9  328.27    8.60
   2  -6   9  332.77    8.70
  -2  -6  -9  339.77    9.40
  -2  -6   9  325.57    8.90
   2  -6  -9  324.17    8.80
   2  -6  -9  333.37    9.50
  -2   6  -9  331.07    8.80
  -2  -6   9  326.67    9.50
  -3   6   9  155.28    5.70
   3  -6   9  155.88    4.90
  -3  -6  -9  152.88    4.80
  -3  -6  -9  163.98    5.40
   3  -6   9  153.18    4.40
   3   6  -9  154.98    5.10
  -3   6  -9  151.38    4.30
   3  -6  -9  159.48    5.50
  -3  -6   9  159.68    5.30
  -3   6  -9  156.68    4.70
  -3  -6   9  155.58    5.70
   3  -6  -9  153.68    4.90
   4  -6   9   14.20    1.70
   4   6  -9   15.50    2.00
  -4  -6  -9   16.50    1.90
  -4   6   9   13.80    2.10
  -4  -6  -9   16.00    2.00
   4  -6  -9   16.50    1.80
   4  -6  -9   14.10    2.00
  -4  -6   9    9.00    2.00
  -4  -6   9   14.90    2.10
  -5  -6  -9   74.29    3.40
  -5  -6  -9   78.79    3.90
  -5   6   9   79.19    4.40
   5  -6   9   74.59    3.70
   5  -6  -9   76.89    4.00
  -5  -6   9   75.59    4.40
  -6   6   9   40.80    4.00
  -6  -6  -9   33.60    3.40
  -6  -6  -9   41.40    3.10
  -6  -6   9   27.50    3.60
   6  -6  -9   33.00    3.10
  -6  -6   9   38.90    4.00
  -7  -6  -9   51.39    3.90
  -7   6   9   57.49    4.40
  -7  -6  -9   42.20    3.40
   7  -6  -9   48.00    3.70
  -7  -6   9   47.30    4.30
  -8  -6  -9   45.60    3.60
  -8  -6  -9   34.80    4.10
  -8   6   9   31.20    3.60
   8  -6  -9   38.70    3.80
  -8  -6   9   33.30    4.20
  -9   6   9   17.50    3.40
  -9  -6  -9   19.80    3.20
  -9  -6  -9   19.20    2.70
  -9  -6   9   17.50    3.30
 -10   6   9    4.80    3.50
 -10  -6  -9    7.90    3.40
 -10  -6  -9    4.50    2.30
 -10  -6   9    8.50    3.00
 -11   6   9    9.20    4.10
 -11  -6  -9    3.50    2.60
 -11  -6  -9    4.20    3.80
 -11  -6   9   11.00    3.50
 -12  -6  -9   26.50    3.60
 -12  -6  -9   12.90    5.10
 -12   6   9   24.10    4.70
 -12  -6   9   21.00    4.30
 -13  -6  -9    0.50    3.60
 -13  -6  -9    0.90    5.70
 -13   6   9    6.10    4.80
 -13  -6   9    9.00    4.40
   0  -7   9    0.00    1.20
   0   7  -9   -1.50    1.10
   0   7   9   -0.60    1.40
   0  -7   9   -1.50    1.20
   0  -7  -9   -1.10    0.90
   0  -7  -9    1.10    1.30
   1  -7   9   18.40    2.20
   1   7  -9   21.10    2.30
  -1  -7  -9   18.30    1.90
   1  -7   9   16.00    1.70
  -1   7   9   18.10    2.20
  -1  -7  -9   17.70    2.10
  -1  -7   9   17.80    2.00
  -1   7  -9   22.00    2.00
   1  -7  -9   17.90    2.30
   1  -7  -9   18.30    2.00
  -1  -7   9   16.80    1.90
   2   7  -9   88.59    3.80
   2  -7   9   94.79    3.70
  -2  -7  -9   97.59    3.60
   2  -7   9   94.29    3.40
  -2  -7  -9   95.89    4.10
  -2   7   9   89.39    4.20
  -2  -7   9   88.19    4.20
   2  -7  -9   91.49    3.60
   2  -7  -9   91.69    4.00
  -2  -7   9   92.09    3.90
  -2   7  -9   90.49    3.80
  -3   7   9    8.10    1.90
   3  -7   9    7.60    1.20
  -3  -7  -9    6.70    1.30
  -3  -7  -9    6.00    1.70
   3  -7   9    7.80    1.60
   3   7  -9    8.40    1.80
  -3   7  -9    8.10    1.40
   3  -7  -9    5.10    1.30
  -3  -7   9    4.90    1.80
   3  -7  -9    5.70    1.70
  -3  -7   9    9.00    1.80
  -4   7   9   46.70    3.70
   4  -7   9   40.60    2.90
  -4  -7  -9   44.20    3.10
   4   7  -9   45.50    3.40
  -4  -7  -9   37.50    2.60
   4  -7  -9   47.10    2.90
   4  -7  -9   43.50    3.10
  -4  -7   9   37.40    3.60
[truncated: 302,032 more chars]
