# Supplementary material for: Catalytic activation of unstrained C(aryl)–C(aryl) bonds in 2,2′-biphenols
Source: Springer Nature journal article supplement (doi:10.1038/s41557-018-0157-x), 2018-10-31
Supplement: 41557_2018_157_MOESM300_ESM.mol [file 41557_2018_157_MOESM300_ESM.mol]

nchem.18051032B-comp3ai.mol
  ChemDraw09071815462D

 16 17  0  0  0  0  0  0  0  0999 V2000
    0.2956   -0.0000    0.0000 C   0  0  0  0  0  0  0  0  0  0  0  0
    0.2956   -0.8250    0.0000 C   0  0  0  0  0  0  0  0  0  0  0  0
    1.0101   -1.2375    0.0000 C   0  0  0  0  0  0  0  0  0  0  0  0
    1.7246   -0.8250    0.0000 C   0  0  0  0  0  0  0  0  0  0  0  0
    1.7246   -0.0000    0.0000 C   0  0  0  0  0  0  0  0  0  0  0  0
    1.0101    0.4125    0.0000 C   0  0  0  0  0  0  0  0  0  0  0  0
    2.4390   -1.2375    0.0000 O   0  0  0  0  0  0  0  0  0  0  0  0
   -0.4189    0.4125    0.0000 C   0  0  0  0  0  0  0  0  0  0  0  0
   -0.4189    1.2375    0.0000 O   0  0  0  0  0  0  0  0  0  0  0  0
   -1.1333    0.0000    0.0000 N   0  0  0  0  0  0  0  0  0  0  0  0
   -1.8870    0.3356    0.0000 C   0  0  0  0  0  0  0  0  0  0  0  0
   -2.4390   -0.2775    0.0000 C   0  0  0  0  0  0  0  0  0  0  0  0
   -2.0265   -0.9920    0.0000 C   0  0  0  0  0  0  0  0  0  0  0  0
   -1.2196   -0.8205    0.0000 C   0  0  0  0  0  0  0  0  0  0  0  0
    1.0101    1.2375    0.0000 I   0  0  0  0  0  0  0  0  0  0  0  0
    2.4390    0.4125    0.0000 C   0  0  0  0  0  0  0  0  0  0  0  0
  5 16  1  0      
  1  2  2  0      
  2  3  1  0      
  3  4  2  0      
  4  5  1  0      
  5  6  2  0      
  6  1  1  0      
  4  7  1  0      
  1  8  1  0      
  8  9  2  0      
  8 10  1  0      
 10 11  1  0      
 11 12  1  0      
 12 13  1  0      
 13 14  1  0      
 14 10  1  0      
  6 15  1  0      
M  STY  1   1 SUP
M  SLB  1   1   1
M  SAL   1  1  16
M  SBL   1  1   1
M  SMT   1 Me
M  SBV   1   1   -0.7145   -0.4125
M  END
